# Supplementary material for: De novo transcriptome analysis of high-salinity stress-induced antioxidant activity and plant phytohormone alterations in Sesuvium portulacastrum
Source: Front Plant Sci. 2022 Sep 23;13:995855. doi: 10.3389/fpls.2022.995855 (PMC9540214; doi:10.3389/fpls.2022.995855)
Supplement: Supplementary file 5 [file Table_5.XLSX]

## Sheet: Sheet1
Supplementary Dataset 1. Gene co-expression clusters of the upregulated DEGs in S. portulacastrum under 600mM NaCl stress.
gene_id	Clusters	nr_description	Control_vs_600mM NaCl_fc	Control_vs_600mM NaCl_log2fc	Control_vs_600mM NaCl_pvalue	Control_vs_600mM NaCl_padjust	Control_vs_600mM NaCl_significant	Control_vs_600mM NaCl_regulate	go	KO_id	KO_name	paths	cog	cog_description	swissprot	pfam
TRINITY_DN1825_c0_g1	Cluster 1		14.5894	3.86684	1.75817e-140	1.24227e-135	yes	up								PF00197(Kunitz_legume:Trypsin and protease inhibitor)
TRINITY_DN14761_c0_g3	Cluster 1	BAG family molecular chaperone regulator 6-like [Physcomitrella patens]	15.6591	3.96893	2.49921e-79	5.88622e-75	yes	up	GO:0051087(molecular_function:chaperone binding)				ENOG410Z1AE(C:Energy production and conversion)	ENOG410Z1AE(Produces ATP from ADP in the presence of a proton gradient across the membrane. The catalytic sites are hosted primarily by the beta subunits (By similarity))	sp|O82345|BAG6_ARATH(BAG family molecular chaperone regulator 6 OS=Arabidopsis thaliana OX=3702 GN=BAG6 PE=1 SV=1)	PF02179(BAG:BAG domain)
TRINITY_DN21524_c0_g1	Cluster 1	hypothetical protein SELMODRAFT_187747 [Selaginella moellendorffii]	9.52555	3.2518	4.5646e-77	8.06302e-73	yes	up	GO:0005975(biological_process:carbohydrate metabolic process); GO:0004565(molecular_function:beta-galactosidase activity); GO:0030246(molecular_function:carbohydrate binding)				COG1874(G:Carbohydrate transport and metabolism)	COG1874(beta-galactosidase)	sp|Q9FFN4|BGAL6_ARATH(Beta-galactosidase 6 OS=Arabidopsis thaliana OX=3702 GN=BGAL6 PE=2 SV=1)	PF01301(Glyco_hydro_35:Glycosyl hydrolases family 35); PF17834(GHD:Beta-sandwich domain in beta galactosidase)
TRINITY_DN10039_c0_g1	Cluster 1	uncharacterized protein LOC9645120 isoform X1 [Selaginella moellendorffii]	9.12911	3.19047	7.09418e-68	7.16077e-64	yes	up	GO:0006355(biological_process:regulation of transcription, DNA-templated); GO:0071949(molecular_function:FAD binding)				ENOG410ZWEA(S:Function unknown)	ENOG410ZWEA(Cell division cycle associated 7)	sp|Q96GN5|CDA7L_HUMAN(Cell division cycle-associated 7-like protein OS=Homo sapiens OX=9606 GN=CDCA7L PE=1 SV=2)	PF10497(zf-4CXXC_R1:Zinc-finger domain of monoamine-oxidase A repressor R1); PF15612(WHIM1:WSTF, HB1, Itc1p, MBD9 motif 1)
TRINITY_DN7977_c0_g1	Cluster 1		32.611	5.02729	6.45573e-67	5.70178e-63	yes	up
TRINITY_DN2896_c0_g1	Cluster 1	hypothetical protein MARPO_0004s0238 [Marchantia polymorpha]	20.0964	4.32887	1.88305e-66	1.47834e-62	yes	up	GO:0006886(biological_process:intracellular protein transport)	K15296	NAPA, SNAPA, SEC17		ENOG410XPQ6(U:Intracellular trafficking, secretion, and vesicular transport)	ENOG410XPQ6(attachment protein)	sp|Q9M5P8|SNAA_SOLTU(Alpha-soluble NSF attachment protein OS=Solanum tuberosum OX=4113 PE=2 SV=1)	PF14938(SNAP:Soluble NSF attachment protein, SNAP); PF13424(TPR_12:Tetratricopeptide repeat)
TRINITY_DN3720_c0_g1	Cluster 1	peamaclein [Selaginella moellendorffii]	6.58683	2.71958	4.30554e-60	2.76561e-56	yes	up					ENOG410YWQ9(O:Posttranslational modification, protein turnover, chaperones)	ENOG410YWQ9(gast1 protein homolog 1)	sp|Q93X17|SNAK2_SOLTU(Snakin-2 OS=Solanum tuberosum OX=4113 GN=SN2 PE=1 SV=1)	PF02704(GASA:Gibberellin regulated protein)
TRINITY_DN9334_c0_g1	Cluster 1		3.67259	1.8768	2.0561e-54	7.26391e-51	yes	up							sp|Q9U8Q4|PRSN_PIERA(Pierisin OS=Pieris rapae OX=64459 PE=1 SV=1)
TRINITY_DN13446_c0_g1	Cluster 1		20.0255	4.32376	5.88232e-54	1.97918e-50	yes	up
TRINITY_DN8014_c0_g1	Cluster 1	SLOW ANION CHANNEL-ASSOCIATED 1b [Ceratopteris richardii]	5.15237	2.36524	3.98062e-53	1.27845e-49	yes	up	GO:0016021(cellular_component:integral component of membrane); GO:0008308(molecular_function:voltage-gated anion channel activity); GO:0006873(biological_process:cellular ion homeostasis); GO:0005623(cellular_component:cell)				ENOG4111I0D(S:Function unknown)	ENOG4111I0D(phd finger)	sp|Q9FLV9|SLAH3_ARATH(S-type anion channel SLAH3 OS=Arabidopsis thaliana OX=3702 GN=SLAH3 PE=1 SV=1)	PF03595(SLAC1:Voltage-dependent anion channel)
TRINITY_DN10757_c0_g3	Cluster 1		15.7468	3.97699	2.31379e-46	6.05502e-43	yes	up
TRINITY_DN813_c0_g2	Cluster 1	transcription factor bHLH62 [Selaginella moellendorffii]	4.90847	2.29527	1.01147e-40	1.9852e-37	yes	up	GO:0003700(molecular_function:transcription factor activity, sequence-specific DNA binding); GO:0006355(biological_process:regulation of transcription, DNA-templated); GO:0046983(molecular_function:protein dimerization activity); GO:0005634(cellular_component:nucleus)				ENOG410YIH7(K:Transcription)	ENOG410YIH7(Transcription factor)	sp|Q9SRT2|BH062_ARATH(Transcription factor bHLH62 OS=Arabidopsis thaliana OX=3702 GN=BHLH62 PE=2 SV=1)	PF00010(HLH:Helix-loop-helix DNA-binding domain)
TRINITY_DN6690_c0_g2	Cluster 1	thaumatin-like protein isoform X2 [Physcomitrella patens]	35.5186	5.1505	2.88525e-40	5.09658e-37	yes	up					ENOG410YD4X(S:Function unknown)	ENOG410YD4X(thaumatin-like protein)	sp|E3SU11|ALL13_OLEEU(Thaumatin-like protein OS=Olea europaea OX=4146 PE=1 SV=1)	PF00314(Thaumatin:Thaumatin family)
TRINITY_DN657_c0_g1	Cluster 1		11.6505	3.54232	5.75934e-40	9.92531e-37	yes	up							sp|O81338|AMP1_MESCR(Antimicrobial peptide 1 OS=Mesembryanthemum crystallinum OX=3544 PE=3 SV=1)
TRINITY_DN22627_c0_g2	Cluster 1	hypothetical protein MARPO_0013s0198 [Marchantia polymorpha]	13.3219	3.73573	2.70023e-37	4.23978e-34	yes	up	GO:0007131(biological_process:reciprocal meiotic recombination)				ENOG4111RC1(S:Function unknown)	ENOG4111RC1(-)	sp|F4KG50|SHOC1_ARATH(Protein SHORTAGE IN CHIASMATA 1 OS=Arabidopsis thaliana OX=3702 GN=SHOC1 PE=1 SV=1)
TRINITY_DN19197_c0_g1	Cluster 1	peamaclein [Selaginella moellendorffii]	3.82289	1.93466	3.12459e-37	4.79944e-34	yes	up					ENOG410YWQ9(O:Posttranslational modification, protein turnover, chaperones)	ENOG410YWQ9(gast1 protein homolog 1)	sp|P46689|GASA1_ARATH(Gibberellin-regulated protein 1 OS=Arabidopsis thaliana OX=3702 GN=GASA1 PE=2 SV=2)	PF02704(GASA:Gibberellin regulated protein)
TRINITY_DN12611_c0_g1	Cluster 1	hypothetical protein AXG93_3818s1070 [Marchantia polymorpha subsp. ruderalis]	5.8428	2.54666	7.67578e-37	1.12989e-33	yes	up	GO:0003824(molecular_function:catalytic activity); GO:0005975(biological_process:carbohydrate metabolic process); GO:0030246(molecular_function:carbohydrate binding)	K18195	RGL4, rhiE		ENOG410YE12(S:Function unknown)	ENOG410YE12(Rhamnogalacturonate lyase)	sp|A5ABH4|RGLB_ASPNC(Probable rhamnogalacturonate lyase B OS=Aspergillus niger (strain CBS 513.88 / FGSC A1513) OX=425011 GN=rglB PE=3 SV=1)	PF14683(CBM-like:Polysaccharide lyase family 4, domain III); PF06045(Rhamnogal_lyase:Rhamnogalacturonate lyase family); PF14686(fn3_3:Polysaccharide lyase family 4, domain II)
TRINITY_DN1785_c0_g1	Cluster 1	gibberellin-regulated protein 4 [Selaginella moellendorffii]	5.16852	2.36975	9.65967e-37	1.36505e-33	yes	up					ENOG410YQ6U(S:Function unknown)	ENOG410YQ6U(Gibberellin-regulated protein)	sp|Q6NMQ7|GASA6_ARATH(Gibberellin-regulated protein 6 OS=Arabidopsis thaliana OX=3702 GN=GASA6 PE=3 SV=1)	PF02704(GASA:Gibberellin regulated protein)
TRINITY_DN19899_c0_g2	Cluster 1		37.0329	5.21073	1.49061e-36	2.06514e-33	yes	up								PF03732(Retrotrans_gag:Retrotransposon gag protein); PF00098(zf-CCHC:Zinc knuckle)
TRINITY_DN1885_c0_g1	Cluster 1	probable xyloglucan endotransglucosylase/hydrolase protein B [Selaginella moellendorffii]	3.14399	1.6526	1.25193e-35	1.52513e-32	yes	up	GO:0042546(biological_process:cell wall biogenesis); GO:0005618(cellular_component:cell wall); GO:0048046(cellular_component:apoplast); GO:0071555(biological_process:cell wall organization); GO:0016762(molecular_function:xyloglucan:xyloglucosyl transferase activity); GO:0004553(molecular_function:hydrolase activity, hydrolyzing O-glycosyl compounds); GO:0010411(biological_process:xyloglucan metab…	K08235	E2.4.1.207		COG2273(G:Carbohydrate transport and metabolism)	COG2273(hydrolase family 16)	sp|P35694|XTH2_SOYBN(Xyloglucan endotransglucosylase/hydrolase 2 OS=Glycine max OX=3847 PE=2 SV=1)	PF00722(Glyco_hydro_16:Glycosyl hydrolases family 16); PF06955(XET_C:Xyloglucan endo-transglycosylase (XET) C-terminus)
TRINITY_DN9324_c0_g1	Cluster 1		8.24567	3.04364	5.08229e-35	5.98499e-32	yes	up
TRINITY_DN8885_c0_g1	Cluster 1		3.21799	1.68616	1.69709e-34	1.87361e-31	yes	up					ENOG410YKCU(S:Function unknown)	ENOG410YKCU(-)
TRINITY_DN33008_c0_g1	Cluster 1	hypothetical protein AXG93_1154s1140 [Marchantia polymorpha subsp. ruderalis]	144.092	7.17085	1.49187e-32	1.5733e-29	yes	up					ENOG4111MK6(S:Function unknown); ENOG410Y65V(S:Function unknown)	ENOG4111MK6(Retrotransposon protein); ENOG410Y65V(Retrotransposon protein)	sp|P0C2F6|RNHX1_ARATH(Putative ribonuclease H protein At1g65750 OS=Arabidopsis thaliana OX=3702 GN=At1g65750 PE=3 SV=1)	PF00078(RVT_1:Reverse transcriptase (RNA-dependent DNA polymerase)); PF13966(zf-RVT:zinc-binding in reverse transcriptase)
TRINITY_DN1432_c0_g1	Cluster 1	peroxidase A2 [Selaginella moellendorffii]	7.22683	2.85336	1.88698e-32	1.96071e-29	yes	up	GO:0020037(molecular_function:heme binding); GO:0006979(biological_process:response to oxidative stress); GO:0005576(cellular_component:extracellular region); GO:0042744(biological_process:hydrogen peroxide catabolic process); GO:0046872(molecular_function:metal ion binding); GO:0004601(molecular_function:peroxidase activity)	K00430	E1.11.1.7	map00940(Phenylpropanoid biosynthesis)	ENOG410YAA5(S:Function unknown)	ENOG410YAA5(peroxidase)	sp|A7NY33|PER4_VITVI(Peroxidase 4 OS=Vitis vinifera OX=29760 GN=GSVIVT00023967001 PE=1 SV=1)	PF00141(peroxidase:Peroxidase)
TRINITY_DN8712_c3_g2	Cluster 1		9.28753	3.2153	2.31023e-30	2.26713e-27	yes	up
TRINITY_DN44987_c0_g2	Cluster 1		97.2184	6.60316	3.13109e-29	2.76541e-26	yes	up
TRINITY_DN7200_c1_g1	Cluster 1	hypothetical protein AXG93_3818s1000 [Marchantia polymorpha subsp. ruderalis]	5.07681	2.34392	6.72603e-29	5.86717e-26	yes	up	GO:0042546(biological_process:cell wall biogenesis); GO:0016762(molecular_function:xyloglucan:xyloglucosyl transferase activity); GO:0005618(cellular_component:cell wall); GO:0048046(cellular_component:apoplast); GO:0071555(biological_process:cell wall organization); GO:0006073(biological_process:cellular glucan metabolic process); GO:0004553(molecular_function:hydrolase activity, hydrolyzing O-g…	K08235	E2.4.1.207		COG2273(U:Intracellular trafficking, secretion, and vesicular transport)	COG2273(Reticulon)	sp|Q8LC45|XTH33_ARATH(Probable xyloglucan endotransglucosylase/hydrolase protein 33 OS=Arabidopsis thaliana OX=3702 GN=XTH33 PE=1 SV=2)	PF00722(Glyco_hydro_16:Glycosyl hydrolases family 16); PF06955(XET_C:Xyloglucan endo-transglycosylase (XET) C-terminus)
TRINITY_DN48072_c0_g1	Cluster 1	uncharacterized protein LOC9650950 [Selaginella moellendorffii]	5.32104	2.41171	2.17549e-28	1.82993e-25	yes	up	GO:0005634(cellular_component:nucleus); GO:0046872(molecular_function:metal ion binding); GO:0008270(molecular_function:zinc ion binding); GO:0005524(molecular_function:ATP binding); GO:0003677(molecular_function:DNA binding)	K11643;K11642	CHD4, MI2B;CHD3, MI2A		COG0553(L:Replication, recombination and repair)	COG0553(helicase)	sp|Q9M658|MOM1_ARATH(Helicase protein MOM1 OS=Arabidopsis thaliana OX=3702 GN=MOM1 PE=1 SV=1)
TRINITY_DN14382_c0_g2	Cluster 1	uncharacterized protein LOC112343504 [Selaginella moellendorffii]	4.95341	2.30842	1.71916e-27	1.38035e-24	yes	up								PF00385(Chromo:Chromo (CHRromatin Organisation MOdifier) domain)
TRINITY_DN57429_c0_g1	Cluster 1		53.6175	5.74463	2.71674e-27	2.13285e-24	yes	up
TRINITY_DN8712_c3_g1	Cluster 1		41.1555	5.36301	1.13004e-25	8.31722e-23	yes	up
TRINITY_DN22768_c0_g1	Cluster 1		12.8411	3.68269	5.06224e-25	3.64982e-22	yes	up					ENOG4111BB5(S:Function unknown)	ENOG4111BB5(F-box kelch-repeat protein At3g06240-like)	sp|Q9SU30|CPR1_ARATH(F-box protein CPR1 OS=Arabidopsis thaliana OX=3702 GN=CPR1 PE=1 SV=2)	PF08268(FBA_3:F-box associated domain)
TRINITY_DN2659_c1_g1	Cluster 1		27.5611	4.78456	9.75049e-25	6.8894e-22	yes	up					ENOG410Y65V(S:Function unknown)	ENOG410Y65V(Retrotransposon protein)	sp|P0C2F6|RNHX1_ARATH(Putative ribonuclease H protein At1g65750 OS=Arabidopsis thaliana OX=3702 GN=At1g65750 PE=3 SV=1)
TRINITY_DN11459_c0_g1	Cluster 1	EaTIP1,1 [Equisetum arvense]	2.84276	1.50729	1.50847e-24	1.04494e-21	yes	up	GO:0016021(cellular_component:integral component of membrane); GO:0015267(molecular_function:channel activity)	K09873	TIP		COG0580(U:Intracellular trafficking, secretion, and vesicular transport)	COG0580(Potassium voltage-gated channel, subfamily H (Eag-related), member)	sp|Q9ATM0|TIP12_MAIZE(Aquaporin TIP1-2 OS=Zea mays OX=4577 GN=TIP1-2 PE=2 SV=1)	PF00230(MIP:Major intrinsic protein)
TRINITY_DN14946_c0_g2	Cluster 1		57.0296	5.83364	3.19157e-24	2.13876e-21	yes	up								PF05695(DUF825:Plant protein of unknown function (DUF825))
TRINITY_DN1206_c3_g1	Cluster 1		4367.4	12.0926	6.95273e-24	4.44469e-21	yes	up
TRINITY_DN22451_c0_g1	Cluster 1	LRR receptor-like serine/threonine-protein kinase FLS2 [Selaginella moellendorffii]	4.2074	2.07293	6.98248e-24	4.44469e-21	yes	up	GO:0016021(cellular_component:integral component of membrane); GO:0005524(molecular_function:ATP binding); GO:0004672(molecular_function:protein kinase activity)	K13420	FLS2	map04016(MAPK signaling pathway - plant); map04626(Plant-pathogen interaction)	COG4886(S:Function unknown)	COG4886(leucine Rich Repeat)	sp|Q9FL28|FLS2_ARATH(LRR receptor-like serine/threonine-protein kinase FLS2 OS=Arabidopsis thaliana OX=3702 GN=FLS2 PE=1 SV=1)	PF00069(Pkinase:Protein kinase domain); PF07714(PK_Tyr_Ser-Thr:Protein tyrosine and serine/threonine kinase)
TRINITY_DN11597_c0_g1	Cluster 1	probable 2-oxoglutarate-dependent dioxygenase ANS [Selaginella moellendorffii]	4.3677	2.12687	9.25814e-24	5.78896e-21	yes	up	GO:0046872(molecular_function:metal ion binding); GO:0051213(molecular_function:dioxygenase activity); GO:0016491(molecular_function:oxidoreductase activity)				COG3491(S:Function unknown)	COG3491(2OGFe(II) oxygenase)	sp|Q39224|SRG1_ARATH(Protein SRG1 OS=Arabidopsis thaliana OX=3702 GN=SRG1 PE=2 SV=1)	PF14226(DIOX_N:non-haem dioxygenase in morphine synthesis N-terminal); PF03171(2OG-FeII_Oxy:2OG-Fe(II) oxygenase superfamily)
TRINITY_DN4071_c0_g1	Cluster 1	shaggy-related protein kinase 2 [Physcomitrella patens]	2.7341	1.45107	1.48352e-23	9.1948e-21	yes	up	GO:0005737(cellular_component:cytoplasm); GO:0004674(molecular_function:protein serine/threonine kinase activity); GO:0005829(cellular_component:cytosol); GO:0007165(biological_process:signal transduction); GO:0005524(molecular_function:ATP binding)	K14502	BIN2	map04075(Plant hormone signal transduction)	COG0515(T:Signal transduction mechanisms)	COG0515(Serine Threonine protein kinase)	sp|Q39011|KSG7_ARATH(Shaggy-related protein kinase eta OS=Arabidopsis thaliana OX=3702 GN=ASK7 PE=1 SV=2)	PF00069(Pkinase:Protein kinase domain); PF07714(PK_Tyr_Ser-Thr:Protein tyrosine and serine/threonine kinase); PF01636(APH:Phosphotransferase enzyme family)
TRINITY_DN27854_c0_g2	Cluster 1	hypothetical protein MARPO_YA0018 [Marchantia polymorpha]	119.707	6.90336	3.87498e-23	2.3008e-20	yes	up					ENOG4111BA7(S:Function unknown); COG2801(L:Replication, recombination and repair)	ENOG4111BA7(Retrotransposon gag protein); COG2801(Retrotransposon protein)		PF03732(Retrotrans_gag:Retrotransposon gag protein); PF13650(Asp_protease_2:Aspartyl protease)
TRINITY_DN26800_c0_g1	Cluster 1	hypothetical protein SELMODRAFT_77968, partial [Selaginella moellendorffii]	5.29536	2.40473	8.25462e-23	4.78071e-20	yes	up	GO:0006891(biological_process:intra-Golgi vesicle-mediated transport); GO:0006890(biological_process:retrograde vesicle-mediated transport, Golgi to ER); GO:0006888(biological_process:ER to Golgi vesicle-mediated transport); GO:0016192(biological_process:vesicle-mediated transport); GO:0030663(cellular_component:COPI-coated vesicle membrane); GO:0006281(biological_process:DNA repair); GO:0016874(…	K17302	COPB2, SEC27		ENOG410XNNY(S:Function unknown)	ENOG410XNNY(coatomer protein complex, subunit beta 2 (beta prime))	sp|Q9CAA0|COB21_ARATH(Coatomer subunit beta'-1 OS=Arabidopsis thaliana OX=3702 GN=At1g79990 PE=2 SV=2)	PF00400(WD40:WD domain, G-beta repeat); PF14783(BBS2_Mid:Ciliary BBSome complex subunit 2, middle region)
TRINITY_DN15082_c0_g1	Cluster 1		8.54323	3.09478	3.36362e-22	1.87137e-19	yes	up					COG0666(S:Function unknown); COG2801(L:Replication, recombination and repair)	COG0666(Ankyrin Repeat); COG2801(Retrotransposon protein)		PF13961(DUF4219:Domain of unknown function (DUF4219))
TRINITY_DN2919_c0_g1	Cluster 1		4.81362	2.26712	5.37838e-22	2.92323e-19	yes	up
TRINITY_DN6486_c0_g3	Cluster 1	alpha-glucan phosphorylase, H isozyme-like [Physcomitrella patens]	2.88817	1.53015	8.7167e-22	4.63079e-19	yes	up	GO:0005737(cellular_component:cytoplasm); GO:0005975(biological_process:carbohydrate metabolic process); GO:0005980(biological_process:glycogen catabolic process); GO:0009570(cellular_component:chloroplast stroma); GO:0102250(molecular_function:linear malto-oligosaccharide phosphorylase activity); GO:0030170(molecular_function:pyridoxal phosphate binding); GO:0009414(biological_process:response t…	K00688	PYG, glgP	map00500(Starch and sucrose metabolism)	COG0058(G:Carbohydrate transport and metabolism)	COG0058(Phosphorylase is an important allosteric enzyme in carbohydrate metabolism. Enzymes from different sources differ in their regulatory mechanisms and in their natural substrates. However, all known phosphorylases share catalytic and structural properties (By similarity))	sp|P53535|PHSL2_SOLTU(Alpha-1,4 glucan phosphorylase L-2 isozyme, chloroplastic/amyloplastic OS=Solanum tuberosum OX=4113 GN=STP-1 PE=1 SV=1)	PF00343(Phosphorylase:Carbohydrate phosphorylase)
TRINITY_DN1604_c1_g2	Cluster 1		6.92128	2.79104	5.74328e-21	2.87804e-18	yes	up							sp|Q9SBK8|THN_BRARP(Thionin OS=Brassica rapa subsp. pekinensis OX=51351 GN=THI2 PE=2 SV=1)	PF00321(Thionin:Plant thionin)
TRINITY_DN7086_c0_g2	Cluster 1	sugar transporter ERD6-like 4 isoform X1 [Physcomitrella patens]	3.84195	1.94184	6.66555e-21	3.31667e-18	yes	up	GO:0022857(molecular_function:transmembrane transporter activity); GO:0016021(cellular_component:integral component of membrane)	K08145	SLC2A8, GLUT8		ENOG410XNQK(G:Carbohydrate transport and metabolism)	ENOG410XNQK(Transporter)	sp|Q8LBI9|EDL16_ARATH(Sugar transporter ERD6-like 16 OS=Arabidopsis thaliana OX=3702 GN=At5g18840 PE=2 SV=2)	PF00083(Sugar_tr:Sugar (and other) transporter); PF07690(MFS_1:Major Facilitator Superfamily)
TRINITY_DN6105_c0_g1	Cluster 1	hypothetical protein MARPO_0072s0092 [Marchantia polymorpha]	2.83594	1.50383	8.3898e-21	4.08826e-18	yes	up	GO:0019477(biological_process:L-lysine catabolic process); GO:0008253(molecular_function:5'-nucleotidase activity); GO:0047130(molecular_function:saccharopine dehydrogenase (NADP+, L-lysine-forming) activity); GO:0009264(biological_process:deoxyribonucleotide catabolic process); GO:0080167(biological_process:response to karrikin); GO:0005829(cellular_component:cytosol); GO:0016491(molecular_funct…	K14157	AASS	map00310(Lysine degradation)	COG1748(E:Amino acid transport and metabolism)	COG1748(saccharopine dehydrogenase)	sp|Q9SMZ4|AASS_ARATH(Alpha-aminoadipic semialdehyde synthase OS=Arabidopsis thaliana OX=3702 GN=LKR/SDH PE=1 SV=1)	PF16653(Sacchrp_dh_C:Saccharopine dehydrogenase C-terminal domain); PF05222(AlaDh_PNT_N:Alanine dehydrogenase/PNT, N-terminal domain); PF04455(Saccharop_dh_N:LOR/SDH bifunctional enzyme conserved region); PF03435(Sacchrp_dh_NADP:Saccharopine dehydrogenase NADP binding domain); PF01262(AlaDh_PNT_C:Alanine dehydrogenase/PNT, C-terminal domain)
TRINITY_DN204_c0_g3	Cluster 1		2385.3	11.22	9.28101e-21	4.46101e-18	yes	up
TRINITY_DN17988_c0_g1	Cluster 1	hypothetical protein AXG93_3426s1300 [Marchantia polymorpha subsp. ruderalis]	13.0488	3.70584	1.12819e-20	5.3861e-18	yes	up					COG0154(J:Translation, ribosomal structure and biogenesis); ENOG4111UBM(S:Function unknown)	COG0154(Allows the formation of correctly charged Gln-tRNA(Gln) through the transamidation of misacylated Glu-tRNA(Gln) in organisms which lack glutaminyl-tRNA synthetase. The reaction takes place in the presence of glutamine and ATP through an activated gamma-phospho-Glu-tRNA(Gln) (By similarity)); ENOG4111UBM(Pollen proteins Ole e I like)		PF01190(Pollen_Ole_e_1:Pollen protein Ole e 1 like)
TRINITY_DN75886_c0_g1	Cluster 1	uncharacterized protein LOC112284010 [Physcomitrella patens]	7.12385	2.83266	2.08657e-20	9.82872e-18	yes	up	GO:0003700(molecular_function:transcription factor activity, sequence-specific DNA binding); GO:0005634(cellular_component:nucleus); GO:0003677(molecular_function:DNA binding)				ENOG410YYVP(K:Transcription); ENOG411198J(K:Transcription)	ENOG410YYVP(AP2); ENOG411198J(AP2 ERF domain-containing transcription factor)	sp|Q9FGF8|ABR1_ARATH(Ethylene-responsive transcription factor ABR1 OS=Arabidopsis thaliana OX=3702 GN=ABR1 PE=2 SV=1)	PF00847(AP2:AP2 domain)
TRINITY_DN5039_c0_g1	Cluster 1		2.40832	1.26803	3.0309e-20	1.39061e-17	yes	up
TRINITY_DN4401_c0_g1	Cluster 1	hypothetical protein MARPO_0206s0002 [Marchantia polymorpha]	2.55622	1.35401	3.35222e-20	1.52811e-17	yes	up	GO:0016021(cellular_component:integral component of membrane); GO:0015299(molecular_function:solute:proton antiporter activity)				COG0025(P:Inorganic ion transport and metabolism)	COG0025(Sodium hydrogen exchanger)	sp|Q9LKW9|NHX7_ARATH(Sodium/hydrogen exchanger 7 OS=Arabidopsis thaliana OX=3702 GN=NHX7 PE=1 SV=1)	PF00999(Na_H_Exchanger:Sodium/hydrogen exchanger family); PF00027(cNMP_binding:Cyclic nucleotide-binding domain)
TRINITY_DN9377_c0_g1	Cluster 1		18.5915	4.21657	7.50787e-20	3.33637e-17	yes	up
TRINITY_DN16183_c0_g1	Cluster 1		49.6349	5.63328	2.53959e-19	1.07449e-16	yes	up
TRINITY_DN30623_c0_g1	Cluster 1		646.996	9.33761	5.66507e-19	2.26145e-16	yes	up								PF14111(DUF4283:Domain of unknown function (DUF4283))
TRINITY_DN12175_c0_g1	Cluster 1		1706.49	10.7368	6.49195e-19	2.56258e-16	yes	up					ENOG410XUN0(S:Function unknown); ENOG410XYMV(S:Function unknown); ENOG4112ASD(S:Function unknown)	ENOG410XUN0(-); ENOG410XYMV(-); ENOG4112ASD(-)	sp|Q3BAI2|YCX91_PHAAO(Uncharacterized protein ORF91 OS=Phalaenopsis aphrodite subsp. formosana OX=308872 PE=4 SV=1)
TRINITY_DN1288_c0_g1	Cluster 1		4.99787	2.32131	7.13815e-19	2.78652e-16	yes	up		K20478	GOLGB1		ENOG410ZVAE(S:Function unknown)	ENOG410ZVAE(-)
TRINITY_DN15339_c0_g1	Cluster 1		3.2611	1.70536	9.18562e-19	3.56609e-16	yes	up		K03327	TC.MATE, SLC47A, norM, mdtK, dinF		COG0534(V:Defense mechanisms)	COG0534(Mate efflux family protein)	sp|Q9LVD9|DTX40_ARATH(Protein DETOXIFICATION 40 OS=Arabidopsis thaliana OX=3702 GN=DTX40 PE=1 SV=1)	PF01554(MatE:MatE)
TRINITY_DN46767_c0_g1	Cluster 1	uncharacterized protein LOC112295988 [Physcomitrella patens]	4.34823	2.12043	1.16012e-18	4.47925e-16	yes	up	GO:0016021(cellular_component:integral component of membrane); GO:0005886(cellular_component:plasma membrane)				ENOG4111QGE(S:Function unknown)	ENOG4111QGE(-)		PF13301(DUF4079:Protein of unknown function (DUF4079))
TRINITY_DN20632_c1_g2	Cluster 1		27.2029	4.76569	2.12393e-18	7.98248e-16	yes	up
TRINITY_DN8175_c0_g1	Cluster 1		3.8728	1.95338	2.38657e-18	8.87515e-16	yes	up
TRINITY_DN23686_c0_g1	Cluster 1	sugar transport protein 7 [Selaginella moellendorffii]	3.68318	1.88095	2.88003e-18	1.06542e-15	yes	up	GO:0022857(molecular_function:transmembrane transporter activity); GO:0016021(cellular_component:integral component of membrane)				ENOG410XNQK(G:Carbohydrate transport and metabolism)	ENOG410XNQK(Transporter)	sp|Q07423|HEX6_RICCO(Hexose carrier protein HEX6 OS=Ricinus communis OX=3988 GN=HEX6 PE=2 SV=1)	PF00083(Sugar_tr:Sugar (and other) transporter); PF07690(MFS_1:Major Facilitator Superfamily)
TRINITY_DN239_c2_g1	Cluster 1		108.734	6.76466	3.49573e-18	1.27318e-15	yes	up
TRINITY_DN3513_c0_g1	Cluster 1	probable L-ascorbate peroxidase 6, chloroplastic/mitochondrial [Selaginella moellendorffii]	2.06293	1.04469	3.85027e-18	1.39512e-15	yes	up	GO:0016021(cellular_component:integral component of membrane); GO:0004601(molecular_function:peroxidase activity); GO:0020037(molecular_function:heme binding); GO:0006979(biological_process:response to oxidative stress)	K00434	E1.11.1.11	map00480(Glutathione metabolism); map00053(Ascorbate and aldarate metabolism)	COG0376(P:Inorganic ion transport and metabolism)	COG0376(Bifunctional enzyme with both catalase and broad- spectrum peroxidase activity (By similarity))	sp|Q42592|APXS_ARATH(L-ascorbate peroxidase S, chloroplastic/mitochondrial OS=Arabidopsis thaliana OX=3702 GN=APXS PE=1 SV=2)	PF00141(peroxidase:Peroxidase)
TRINITY_DN3404_c0_g1	Cluster 1	cyclin-U4-1 [Selaginella moellendorffii]	4.38319	2.13198	4.83372e-18	1.71626e-15	yes	up	GO:0019901(molecular_function:protein kinase binding); GO:0000079(biological_process:regulation of cyclin-dependent protein serine/threonine kinase activity)				ENOG4111TTK(C:Energy production and conversion)	ENOG4111TTK(Aldo keto reductase)	sp|O80513|CCU41_ARATH(Cyclin-U4-1 OS=Arabidopsis thaliana OX=3702 GN=CYCU4-1 PE=1 SV=1)	PF08613(Cyclin:Cyclin); PF00134(Cyclin_N:Cyclin, N-terminal domain)
TRINITY_DN15150_c0_g1	Cluster 1		10.2054	3.35126	1.61754e-17	5.52128e-15	yes	up
TRINITY_DN13401_c0_g1	Cluster 1	hypothetical protein AXG93_949s1120 [Marchantia polymorpha subsp. ruderalis]	5.57813	2.47978	2.8064e-17	9.44246e-15	yes	up	GO:0016021(cellular_component:integral component of membrane); GO:0016746(molecular_function:transferase activity, transferring acyl groups)	K13508	GPAT	map00564(Glycerophospholipid metabolism); map00561(Glycerolipid metabolism)	ENOG410YBBE(I:Lipid transport and metabolism)	ENOG410YBBE(glycerol-3-phosphate acyltransferase)	sp|Q9FZ22|GPAT2_ARATH(Probable glycerol-3-phosphate acyltransferase 2 OS=Arabidopsis thaliana OX=3702 GN=GPAT2 PE=2 SV=1)	PF01553(Acyltransferase:Acyltransferase)
TRINITY_DN20799_c0_g1	Cluster 1		1269.24	10.3097	3.3131e-17	1.10422e-14	yes	up
TRINITY_DN12428_c0_g2	Cluster 1	hypothetical protein AXG93_2145s1510 [Marchantia polymorpha subsp. ruderalis]	4.29802	2.10367	3.98018e-17	1.31415e-14	yes	up					ENOG4111MK6(S:Function unknown)	ENOG4111MK6(Retrotransposon protein)	sp|P0C2F6|RNHX1_ARATH(Putative ribonuclease H protein At1g65750 OS=Arabidopsis thaliana OX=3702 GN=At1g65750 PE=3 SV=1)	PF00078(RVT_1:Reverse transcriptase (RNA-dependent DNA polymerase)); PF13966(zf-RVT:zinc-binding in reverse transcriptase)
TRINITY_DN68418_c0_g1	Cluster 1		18.0635	4.17501	5.05814e-17	1.63942e-14	yes	up
TRINITY_DN7455_c0_g1	Cluster 1	pectinesterase [Selaginella moellendorffii]	9.86034	3.30164	1.09173e-16	3.44369e-14	yes	up	GO:0042545(biological_process:cell wall modification); GO:0005618(cellular_component:cell wall); GO:0016021(cellular_component:integral component of membrane); GO:0030599(molecular_function:pectinesterase activity); GO:0005576(cellular_component:extracellular region); GO:0045330(molecular_function:aspartyl esterase activity); GO:0004857(molecular_function:enzyme inhibitor activity); GO:0045490(bi…	K01051	E3.1.1.11	map00040(Pentose and glucuronate interconversions)	COG4677(G:Carbohydrate transport and metabolism)	COG4677(pectinesterase)	sp|Q43062|PME_PRUPE(Pectinesterase/pectinesterase inhibitor PPE8B OS=Prunus persica OX=3760 PE=2 SV=1)	PF01095(Pectinesterase:Pectinesterase); PF04043(PMEI:Plant invertase/pectin methylesterase inhibitor)
TRINITY_DN54871_c0_g3	Cluster 1		3.1124	1.63803	1.10576e-16	3.47243e-14	yes	up
TRINITY_DN15625_c1_g1	Cluster 1		11.348	3.50436	1.46729e-16	4.48806e-14	yes	up
TRINITY_DN42_c0_g1	Cluster 1		2.97694	1.57383	1.6915e-16	5.12944e-14	yes	up
TRINITY_DN1536_c0_g3	Cluster 1	uncharacterized protein LOC9652308 [Selaginella moellendorffii]	6.27255	2.64905	1.81114e-16	5.44553e-14	yes	up	GO:0004451(molecular_function:isocitrate lyase activity); GO:0003824(molecular_function:catalytic activity); GO:0046872(molecular_function:metal ion binding); GO:0019752(biological_process:carboxylic acid metabolic process)				COG2513(G:Carbohydrate transport and metabolism)	COG2513(methylisocitrate lyase)	sp|Q05957|PDP_DIACA(Petal death protein OS=Dianthus caryophyllus OX=3570 GN=PDP PE=1 SV=1)	PF13714(PEP_mutase:Phosphoenolpyruvate phosphomutase); PF00463(ICL:Isocitrate lyase family)
TRINITY_DN16123_c0_g1	Cluster 1	hypothetical protein AXG93_4368s1940 [Marchantia polymorpha subsp. ruderalis]	2.21471	1.14712	1.87155e-16	5.6033e-14	yes	up	GO:0005978(biological_process:glycogen biosynthetic process); GO:0016021(cellular_component:integral component of membrane); GO:0008878(molecular_function:glucose-1-phosphate adenylyltransferase activity); GO:0019252(biological_process:starch biosynthetic process); GO:0005524(molecular_function:ATP binding); GO:0009507(cellular_component:chloroplast)	K00975	glgC	map00520(Amino sugar and nucleotide sugar metabolism); map00500(Starch and sucrose metabolism)	COG0448(S:Function unknown)	COG0448(Endonuclease/Exonuclease/phosphatase family)	sp|P23509|GLGS_SOLTU(Glucose-1-phosphate adenylyltransferase small subunit, chloroplastic/amyloplastic OS=Solanum tuberosum OX=4113 PE=1 SV=2)	PF00483(NTP_transferase:Nucleotidyl transferase); PF12804(NTP_transf_3:MobA-like NTP transferase domain)
TRINITY_DN15540_c1_g1	Cluster 1		4.80465	2.26443	2.52858e-16	7.44423e-14	yes	up
TRINITY_DN25874_c0_g1	Cluster 1		32.6947	5.03099	4.54325e-16	1.31026e-13	yes	up
TRINITY_DN1831_c0_g3	Cluster 1	kinesin 4-Ic protein [Marsilea vestita]	4.32398	2.11236	4.82782e-16	1.38666e-13	yes	up	GO:0008017(molecular_function:microtubule binding); GO:0007018(biological_process:microtubule-based movement); GO:0007052(biological_process:mitotic spindle organization); GO:0005524(molecular_function:ATP binding); GO:0016887(molecular_function:ATPase activity); GO:0005871(cellular_component:kinesin complex); GO:0005874(cellular_component:microtubule); GO:0003777(molecular_function:microtubule m…	K10395	KIF4_21_27		COG5059(Z:Cytoskeleton)	COG5059(Kinesin family member)	sp|F4K0J3|KN4C_ARATH(Kinesin-like protein KIN-4C OS=Arabidopsis thaliana OX=3702 GN=KIN4C PE=2 SV=2)	PF00225(Kinesin:Kinesin motor domain)
TRINITY_DN2635_c1_g1	Cluster 1		2.91651	1.54424	7.30377e-16	2.07254e-13	yes	up
TRINITY_DN6762_c0_g1	Cluster 1		2.28684	1.19335	7.69134e-16	2.14801e-13	yes	up
TRINITY_DN4217_c0_g1	Cluster 1	hypothetical protein MARPO_0133s0047 [Marchantia polymorpha]	2.07229	1.05123	1.33123e-15	3.64577e-13	yes	up	GO:0007165(biological_process:signal transduction)				ENOG410XQR0(S:Function unknown)	ENOG410XQR0(inverted formin, FH2 and WH2 domain containing)	sp|Q9SE97|FH1_ARATH(Formin-like protein 1 OS=Arabidopsis thaliana OX=3702 GN=FH1 PE=1 SV=1)	PF02181(FH2:Formin Homology 2 Domain)
TRINITY_DN6733_c0_g1	Cluster 1		829.56	9.6962	1.34622e-15	3.67259e-13	yes	up								PF13966(zf-RVT:zinc-binding in reverse transcriptase)
TRINITY_DN4225_c0_g1	Cluster 1	hydroxycinnamoyltransferase 1 isoform X1 [Selaginella moellendorffii]	2.29133	1.19619	2.24571e-15	6.07951e-13	yes	up	GO:0016747(molecular_function:transferase activity, transferring acyl groups other than amino-acyl groups)				ENOG410YADF(S:Function unknown)	ENOG410YADF(transferase) family)	sp|Q9SND9|Y3028_ARATH(Uncharacterized acetyltransferase At3g50280 OS=Arabidopsis thaliana OX=3702 GN=At3g50280 PE=3 SV=1)	PF02458(Transferase:Transferase family)
TRINITY_DN5401_c0_g1	Cluster 1	AP2/ERF and B3 domain-containing transcription factor RAV1 [Selaginella moellendorffii]	3.61167	1.85267	2.80876e-15	7.54596e-13	yes	up	GO:0003700(molecular_function:transcription factor activity, sequence-specific DNA binding); GO:0005634(cellular_component:nucleus); GO:0003677(molecular_function:DNA binding)	K09287	RAV		ENOG4110AU5(K:Transcription)	ENOG4110AU5(AP2 ERF and B3 domain-containing)	sp|P82280|RAV2_ARATH(AP2/ERF and B3 domain-containing transcription repressor RAV2 OS=Arabidopsis thaliana OX=3702 GN=RAV2 PE=1 SV=1)	PF02362(B3:B3 DNA binding domain); PF00847(AP2:AP2 domain)
TRINITY_DN19462_c0_g3	Cluster 1	acid phosphatase 1-like isoform X2 [Physcomitrella patens]	3.45195	1.78741	2.87863e-15	7.67529e-13	yes	up	GO:0016021(cellular_component:integral component of membrane)				ENOG410YCRN(S:Function unknown)	ENOG410YCRN(Acid phosphatase)	sp|P27061|PPA1_SOLLC(Acid phosphatase 1 OS=Solanum lycopersicum OX=4081 GN=APS1 PE=2 SV=1)	PF03767(Acid_phosphat_B:HAD superfamily, subfamily IIIB (Acid phosphatase))
TRINITY_DN113_c0_g2	Cluster 1	hypothetical protein SELMODRAFT_99264 [Selaginella moellendorffii]	3.59168	1.84466	3.1397e-15	8.30869e-13	yes	up					ENOG410YWQ9(O:Posttranslational modification, protein turnover, chaperones)	ENOG410YWQ9(gast1 protein homolog 1)	sp|Q93X17|SNAK2_SOLTU(Snakin-2 OS=Solanum tuberosum OX=4113 GN=SN2 PE=1 SV=1)	PF02704(GASA:Gibberellin regulated protein)
TRINITY_DN2547_c0_g1	Cluster 1	uncharacterized protein LOC112277124 [Physcomitrella patens]	2.99213	1.58117	3.27154e-15	8.56139e-13	yes	up	GO:0010019(biological_process:chloroplast-nucleus signaling pathway); GO:0009507(cellular_component:chloroplast); GO:0046906(molecular_function:tetrapyrrole binding)				ENOG410XQHG(S:Function unknown)	ENOG410XQHG(GUN4-like)	sp|Q9LX31|GUN4C_ARATH(Tetrapyrrole-binding protein, chloroplastic OS=Arabidopsis thaliana OX=3702 GN=GUN4 PE=1 SV=1)	PF05419(GUN4:GUN4-like)
TRINITY_DN476_c0_g1	Cluster 1	ABC transporter B family member 19-like [Physcomitrella patens]	3.06534	1.61605	4.31628e-15	1.10099e-12	yes	up	GO:0042626(molecular_function:ATPase activity, coupled to transmembrane movement of substances); GO:0016021(cellular_component:integral component of membrane); GO:0016887(molecular_function:ATPase activity); GO:0005524(molecular_function:ATP binding)	K05658	ABCB1, CD243	map02010(ABC transporters)	COG1132(V:Defense mechanisms)	COG1132((ABC) transporter)	sp|Q9C7F8|AB13B_ARATH(ABC transporter B family member 13 OS=Arabidopsis thaliana OX=3702 GN=ABCB13 PE=3 SV=1)	PF00664(ABC_membrane:ABC transporter transmembrane region); PF00005(ABC_tran:ABC transporter); PF02463(SMC_N:RecF/RecN/SMC N terminal domain); PF13191(AAA_16:AAA ATPase domain); PF13401(AAA_22:AAA domain)
TRINITY_DN13894_c0_g2	Cluster 1		9.35371	3.22554	4.99526e-15	1.26054e-12	yes	up							sp|Q0WPS2|B561M_ARATH(Cytochrome b561 domain-containing protein At4g18260 OS=Arabidopsis thaliana OX=3702 GN=At4g18260 PE=2 SV=1)
TRINITY_DN18265_c0_g4	Cluster 1		739.39	9.53019	5.19402e-15	1.30603e-12	yes	up
TRINITY_DN86730_c0_g1	Cluster 1	bark storage protein A [Selaginella moellendorffii]	15.6112	3.96451	7.32229e-15	1.79643e-12	yes	up	GO:0003824(molecular_function:catalytic activity); GO:0006260(biological_process:DNA replication); GO:0009116(biological_process:nucleoside metabolic process); GO:0042025(cellular_component:host cell nucleus)				COG0775(F:Nucleotide transport and metabolism); ENOG410YQE0(S:Function unknown)	COG0775(Catalyzes the irreversible cleavage of the glycosidic bond in both 5'-methylthioadenosine (MTA) and S- adenosylhomocysteine (SAH AdoHcy) to adenine and the corresponding thioribose, 5'-methylthioribose and S-ribosylhomocysteine, respectively (By similarity)); ENOG410YQE0(Phosphorylase superfamily)	sp|Q07469|BSPA_POPDE(Bark storage protein A OS=Populus deltoides OX=3696 GN=BSPA PE=2 SV=1)	PF01048(PNP_UDP_1:Phosphorylase superfamily)
TRINITY_DN25523_c0_g4	Cluster 1		718.797	9.48944	7.40641e-15	1.81078e-12	yes	up
TRINITY_DN16658_c0_g2	Cluster 1		668.448	9.38467	8.46895e-15	2.04229e-12	yes	up
TRINITY_DN44987_c1_g1	Cluster 1		659.943	9.3662	1.52068e-14	3.61772e-12	yes	up
TRINITY_DN76659_c0_g2	Cluster 1	uncharacterized protein LOC9648412 isoform X1 [Selaginella moellendorffii]	3.79765	1.92511	1.68511e-14	3.99546e-12	yes	up					ENOG410Y65V(S:Function unknown)	ENOG410Y65V(Retrotransposon protein)	sp|P0C2F6|RNHX1_ARATH(Putative ribonuclease H protein At1g65750 OS=Arabidopsis thaliana OX=3702 GN=At1g65750 PE=3 SV=1)	PF13456(RVT_3:Reverse transcriptase-like); PF00075(RNase_H:RNase H)
TRINITY_DN11424_c0_g2	Cluster 1	hypothetical protein SELMODRAFT_167957 [Selaginella moellendorffii]	4.16777	2.05928	1.72107e-14	4.06577e-12	yes	up	GO:0016758(molecular_function:transferase activity, transferring hexosyl groups)				COG1819(S:Function unknown)	COG1819(Transferase)	sp|K4CWS6|U75C1_SOLLC(UDP-glycosyltransferase 75C1 OS=Solanum lycopersicum OX=4081 GN=UGT75C1 PE=1 SV=1)	PF00201(UDPGT:UDP-glucoronosyl and UDP-glucosyl transferase)
TRINITY_DN4962_c0_g1	Cluster 1	hypothetical protein MARPO_0033s0001 [Marchantia polymorpha]	2.12551	1.08781	1.72627e-14	4.06577e-12	yes	up	GO:0016491(molecular_function:oxidoreductase activity)	K10767	ALKBH5		ENOG410YEYR(S:Function unknown); COG3145(L:Replication, recombination and repair)	ENOG410YEYR(2OG-Fe(II) oxygenase superfamily); COG3145(Alkylated DNA repair protein)	sp|Q9ZT92|AK10B_ARATH(RNA demethylase ALKBH10B OS=Arabidopsis thaliana OX=3702 GN=ALKBH10B PE=1 SV=1)	PF03171(2OG-FeII_Oxy:2OG-Fe(II) oxygenase superfamily)
TRINITY_DN79484_c0_g2	Cluster 1	hypothetical protein AXG93_2145s1510 [Marchantia polymorpha subsp. ruderalis]	640.195	9.32237	1.81939e-14	4.27085e-12	yes	up	GO:0004523(molecular_function:RNA-DNA hybrid ribonuclease activity); GO:0003676(molecular_function:nucleic acid binding)				ENOG410Y65V(S:Function unknown); ENOG4111MK6(S:Function unknown)	ENOG410Y65V(Retrotransposon protein); ENOG4111MK6(Retrotransposon protein)	sp|P0C2F6|RNHX1_ARATH(Putative ribonuclease H protein At1g65750 OS=Arabidopsis thaliana OX=3702 GN=At1g65750 PE=3 SV=1)	PF00078(RVT_1:Reverse transcriptase (RNA-dependent DNA polymerase))
TRINITY_DN47683_c0_g1	Cluster 1		10.5163	3.39456	2.44204e-14	5.6388e-12	yes	up								PF02992(Transposase_21:Transposase family tnp2); PF13963(Transpos_assoc:Transposase-associated domain); PF13952(DUF4216:Domain of unknown function (DUF4216))
TRINITY_DN6066_c0_g1	Cluster 1	hypothetical protein MARPO_0095s0012 [Marchantia polymorpha]	2.74704	1.45788	2.72168e-14	6.24369e-12	yes	up	GO:0016298(molecular_function:lipase activity); GO:0006629(biological_process:lipid metabolic process); GO:0016788(molecular_function:hydrolase activity, acting on ester bonds)				COG3240(S:Function unknown)	COG3240(GDSL esterase lipase)	sp|Q9SYF0|GLIP2_ARATH(GDSL esterase/lipase 2 OS=Arabidopsis thaliana OX=3702 GN=GLIP2 PE=2 SV=1)	PF00657(Lipase_GDSL:GDSL-like Lipase/Acylhydrolase)
TRINITY_DN11201_c1_g1	Cluster 1		4.33743	2.11684	3.65381e-14	8.2746e-12	yes	up								PF10950(Organ_specific:Organ specific protein)
TRINITY_DN8215_c0_g1	Cluster 1	hypothetical protein AXG93_620s1240 [Marchantia polymorpha subsp. ruderalis]	2.01529	1.01099	4.09113e-14	9.20596e-12	yes	up	GO:0016491(molecular_function:oxidoreductase activity)				COG0604(C:Energy production and conversion)	COG0604(alcohol dehydrogenase)	sp|Q53FA7|QORX_HUMAN(Quinone oxidoreductase PIG3 OS=Homo sapiens OX=9606 GN=TP53I3 PE=1 SV=2)	PF00107(ADH_zinc_N:Zinc-binding dehydrogenase); PF13602(ADH_zinc_N_2:Zinc-binding dehydrogenase); PF08240(ADH_N:Alcohol dehydrogenase GroES-like domain); PF00106(adh_short:short chain dehydrogenase)
TRINITY_DN14731_c0_g3	Cluster 1		6.80642	2.7669	4.98786e-14	1.10479e-11	yes	up
TRINITY_DN6361_c0_g1	Cluster 1		8.07371	3.01323	5.23547e-14	1.15601e-11	yes	up
TRINITY_DN126_c0_g1	Cluster 1		2.00648	1.00467	5.37463e-14	1.18304e-11	yes	up					ENOG410ZUCS(S:Function unknown)	ENOG410ZUCS(-)
TRINITY_DN25424_c0_g1	Cluster 1	anthocyanidin 3-O-glucosyltransferase 7 [Selaginella moellendorffii]	3.93273	1.97553	5.39428e-14	1.18368e-11	yes	up	GO:0016758(molecular_function:transferase activity, transferring hexosyl groups)	K13691	SGT1		COG1819(S:Function unknown)	COG1819(Transferase)	sp|Q9SYK9|U74E2_ARATH(UDP-glycosyltransferase 74E2 OS=Arabidopsis thaliana OX=3702 GN=UGT74E2 PE=1 SV=1)	PF00201(UDPGT:UDP-glucoronosyl and UDP-glucosyl transferase)
TRINITY_DN29160_c0_g2	Cluster 1		4.7653	2.25257	6.53529e-14	1.41645e-11	yes	up
TRINITY_DN19005_c0_g2	Cluster 1		67.9493	6.08639	7.57679e-14	1.61251e-11	yes	up
TRINITY_DN13584_c0_g3	Cluster 1		6.36208	2.6695	9.05443e-14	1.90799e-11	yes	up
TRINITY_DN8092_c0_g1	Cluster 1	universal stress protein PHOS32 [Selaginella moellendorffii]	3.03499	1.60169	9.4834e-14	1.98833e-11	yes	up					ENOG410ZKU6(S:Function unknown)	ENOG410ZKU6(universal stress protein)	sp|Q8VYN9|PHO32_ARATH(Universal stress protein PHOS32 OS=Arabidopsis thaliana OX=3702 GN=PHOS32 PE=1 SV=1)	PF00582(Usp:Universal stress protein family)
TRINITY_DN44987_c0_g4	Cluster 1		574.572	9.16634	1.23843e-13	2.55858e-11	yes	up
TRINITY_DN17715_c0_g1	Cluster 1		20.4076	4.35103	1.26771e-13	2.61145e-11	yes	up
TRINITY_DN8324_c1_g4	Cluster 1		6.51473	2.70371	1.29369e-13	2.65722e-11	yes	up
TRINITY_DN10757_c0_g1	Cluster 1		15.8742	3.98861	1.52055e-13	3.08729e-11	yes	up
TRINITY_DN52458_c0_g2	Cluster 1		19.5523	4.28927	1.89108e-13	3.79597e-11	yes	up		K16578	CLASP1_2					PF13966(zf-RVT:zinc-binding in reverse transcriptase)
TRINITY_DN86690_c0_g1	Cluster 1		3.81907	1.93322	2.47433e-13	4.86988e-11	yes	up
TRINITY_DN10082_c0_g1	Cluster 1	hypothetical protein AXG93_4182s1050 [Marchantia polymorpha subsp. ruderalis]	3.57626	1.83845	2.83034e-13	5.53971e-11	yes	up					ENOG410Y929(O:Posttranslational modification, protein turnover, chaperones)	ENOG410Y929(DNAJ heat shock N-terminal domain-containing protein)		PF14559(TPR_19:Tetratricopeptide repeat)
TRINITY_DN17203_c0_g2	Cluster 1		58.6853	5.87493	3.68322e-13	7.01469e-11	yes	up					ENOG410Y13W(S:Function unknown)	ENOG410Y13W(PG1 protein, homology to Homo sapiens)
TRINITY_DN1151_c0_g1	Cluster 1		2.85739	1.5147	3.70526e-13	7.0377e-11	yes	up
TRINITY_DN464_c0_g1	Cluster 1		3.31214	1.72777	3.91996e-13	7.38593e-11	yes	up
TRINITY_DN31150_c0_g2	Cluster 1		473.959	8.88862	4.68083e-13	8.70352e-11	yes	up
TRINITY_DN63389_c0_g1	Cluster 1	hypothetical protein PHYPA_007972, partial [Physcomitrella patens]	56.3925	5.81743	5.155e-13	9.51011e-11	yes	up	GO:0007018(biological_process:microtubule-based movement); GO:0008569(molecular_function:ATP-dependent microtubule motor activity, minus-end-directed); GO:0045505(molecular_function:dynein intermediate chain binding); GO:0015074(biological_process:DNA integration); GO:0051959(molecular_function:dynein light intermediate chain binding); GO:0008270(molecular_function:zinc ion binding); GO:0003676(m…	K03006	RPB1, POLR2A	map03020(RNA polymerase)	ENOG410XS4D(S:Function unknown); COG2801(L:Replication, recombination and repair)	ENOG410XS4D(Retrotransposon protein); COG2801(Retrotransposon protein)	sp|P10978|POLX_TOBAC(Retrovirus-related Pol polyprotein from transposon TNT 1-94 OS=Nicotiana tabacum OX=4097 PE=2 SV=1)	PF13976(gag_pre-integrs:GAG-pre-integrase domain); PF00665(rve:Integrase core domain)
TRINITY_DN38588_c0_g2	Cluster 1	hypothetical protein SELMODRAFT_125697, partial [Selaginella moellendorffii]	510.84	8.99673	6.00912e-13	1.09712e-10	yes	up	GO:0006355(biological_process:regulation of transcription, DNA-templated); GO:0003677(molecular_function:DNA binding)				ENOG4111FG3(S:Function unknown)	ENOG4111FG3(-)	sp|K4BNG7|NAP2_SOLLC(NAC domain-containing protein 2 OS=Solanum lycopersicum OX=4081 GN=NAP2 PE=2 SV=1)	PF02365(NAM:No apical meristem (NAM) protein)
TRINITY_DN13682_c0_g1	Cluster 1	hypothetical protein MARPO_0105s0050 [Marchantia polymorpha]	2.50938	1.32733	6.31476e-13	1.147e-10	yes	up	GO:0016021(cellular_component:integral component of membrane); GO:0005524(molecular_function:ATP binding); GO:0004672(molecular_function:protein kinase activity)	K00924	E2.7.1.-		ENOG41102Z7(T:Signal transduction mechanisms)	ENOG41102Z7(receptor protein kinase)	sp|P43298|TMK1_ARATH(Receptor protein kinase TMK1 OS=Arabidopsis thaliana OX=3702 GN=TMK1 PE=1 SV=1)	PF00069(Pkinase:Protein kinase domain); PF07714(PK_Tyr_Ser-Thr:Protein tyrosine and serine/threonine kinase); PF13855(LRR_8:Leucine rich repeat); PF12799(LRR_4:Leucine Rich repeats (2 copies)); PF08263(LRRNT_2:Leucine rich repeat N-terminal domain)
TRINITY_DN2503_c0_g4	Cluster 1		462.726	8.85401	6.56716e-13	1.18978e-10	yes	up
TRINITY_DN1512_c0_g1	Cluster 1		2.24625	1.16752	7.47853e-13	1.33101e-10	yes	up
TRINITY_DN3604_c0_g1	Cluster 1	inositol-phosphate phosphatase [Selaginella moellendorffii]	2.05506	1.03918	9.15397e-13	1.60494e-10	yes	up	GO:0019853(biological_process:L-ascorbic acid biosynthetic process); GO:0008934(molecular_function:inositol monophosphate 1-phosphatase activity); GO:0006021(biological_process:inositol biosynthetic process); GO:0052832(molecular_function:inositol monophosphate 3-phosphatase activity); GO:0005829(cellular_component:cytosol); GO:0046854(biological_process:phosphatidylinositol phosphorylation); GO:…	K10047	VTC4	map04070(Phosphatidylinositol signaling system); map00053(Ascorbate and aldarate metabolism); map00562(Inositol phosphate metabolism)	COG0483(G:Carbohydrate transport and metabolism)	COG0483(inositol monophosphatase)	sp|O49071|IMPP_MESCR(Inositol monophosphatase OS=Mesembryanthemum crystallinum OX=3544 GN=IMP1 PE=2 SV=1)	PF00459(Inositol_P:Inositol monophosphatase family)
TRINITY_DN68841_c1_g3	Cluster 1		434.643	8.76369	1.08705e-12	1.87555e-10	yes	up
TRINITY_DN4253_c0_g1	Cluster 1	abscisic acid 8'-hydroxylase 1 isoform X2 [Selaginella moellendorffii]	3.3827	1.75817	1.11252e-12	1.91258e-10	yes	up	GO:0005506(molecular_function:iron ion binding); GO:0016705(molecular_function:oxidoreductase activity, acting on paired donors, with incorporation or reduction of molecular oxygen); GO:0016021(cellular_component:integral component of membrane); GO:0004497(molecular_function:monooxygenase activity); GO:0020037(molecular_function:heme binding)	K09843	CYP707A	map00906(Carotenoid biosynthesis)	COG2124(Q:Secondary metabolites biosynthesis, transport and catabolism)	COG2124(Cytochrome p450)	sp|K4CI52|ABAH2_SOLLC(Abscisic acid 8'-hydroxylase CYP707A2 OS=Solanum lycopersicum OX=4081 GN=CYP707A2 PE=2 SV=1)	PF00067(p450:Cytochrome P450)
TRINITY_DN2058_c0_g1	Cluster 1	uncharacterized GPI-anchored protein At1g61900 [Selaginella moellendorffii]	2.12522	1.08761	1.2031e-12	2.06328e-10	yes	up	GO:0005886(cellular_component:plasma membrane)				ENOG410YBW4(S:Function unknown)	ENOG410YBW4(-)	sp|Q8GUI4|UGPI6_ARATH(Uncharacterized GPI-anchored protein At1g61900 OS=Arabidopsis thaliana OX=3702 GN=At1g61900 PE=2 SV=1)	PF19160(SPARK:SPARK)
TRINITY_DN4925_c0_g1	Cluster 1		3.44547	1.7847	1.37177e-12	2.32994e-10	yes	up								PF12609(DUF3774:Wound-induced protein)
TRINITY_DN401_c1_g3	Cluster 1		392.28	8.61574	1.57735e-12	2.65359e-10	yes	up
TRINITY_DN28072_c2_g1	Cluster 1		6.7524	2.7554	1.73099e-12	2.8846e-10	yes	up
TRINITY_DN57380_c0_g1	Cluster 1	galactoside 2-alpha-L-fucosyltransferase-like [Selaginella moellendorffii]	426.181	8.73532	1.86699e-12	3.08936e-10	yes	up	GO:0008107(molecular_function:galactoside 2-alpha-L-fucosyltransferase activity); GO:0005794(cellular_component:Golgi apparatus); GO:0042546(biological_process:cell wall biogenesis); GO:0009969(biological_process:xyloglucan biosynthetic process); GO:0071555(biological_process:cell wall organization); GO:0032580(cellular_component:Golgi cisterna membrane)	K13681	FUT		ENOG410XXHE(O:Posttranslational modification, protein turnover, chaperones)	ENOG410XXHE(fucosyltransferase)	sp|Q9SWH5|FUT1_ARATH(Galactoside 2-alpha-L-fucosyltransferase OS=Arabidopsis thaliana OX=3702 GN=FUT1 PE=1 SV=2)	PF03254(XG_FTase:Xyloglucan fucosyltransferase)
TRINITY_DN22518_c0_g1	Cluster 1		0.130035	-2.94302	1.91438e-12	3.15301e-10	yes	down					ENOG410Y6RQ(S:Function unknown); ENOG410XZB8(S:Function unknown); ENOG410XXPX(S:Function unknown); ENOG410YM5T(S:Function unknown)	ENOG410Y6RQ(-); ENOG410XZB8(-); ENOG410XXPX(-); ENOG410YM5T(-)
TRINITY_DN9275_c3_g1	Cluster 1		55.847	5.80341	1.94133e-12	3.18256e-10	yes	up
TRINITY_DN11786_c0_g2	Cluster 1	actin [Selaginella moellendorffii]	3.60903	1.85161	2.01146e-12	3.2617e-10	yes	up	GO:0005737(cellular_component:cytoplasm); GO:0005856(cellular_component:cytoskeleton); GO:0005524(molecular_function:ATP binding)	K10355	ACTF		COG5277(Z:Cytoskeleton)	COG5277(Actin-related protein)	sp|A2XLF2|ACT1_ORYSI(Actin-1 OS=Oryza sativa subsp. indica OX=39946 GN=ACT1 PE=2 SV=1)	PF00022(Actin:Actin)
TRINITY_DN192_c0_g1	Cluster 1	beta-galactosidase 9-like [Physcomitrella patens]	2.1992	1.13698	2.13849e-12	3.44976e-10	yes	up	GO:0005975(biological_process:carbohydrate metabolic process); GO:0016021(cellular_component:integral component of membrane); GO:0004565(molecular_function:beta-galactosidase activity); GO:0030246(molecular_function:carbohydrate binding); GO:0005774(cellular_component:vacuolar membrane)				COG1874(G:Carbohydrate transport and metabolism)	COG1874(beta-galactosidase)	sp|Q9SCW1|BGAL1_ARATH(Beta-galactosidase 1 OS=Arabidopsis thaliana OX=3702 GN=BGAL1 PE=2 SV=1)	PF01301(Glyco_hydro_35:Glycosyl hydrolases family 35); PF17834(GHD:Beta-sandwich domain in beta galactosidase); PF02140(Gal_Lectin:Galactose binding lectin domain); PF02449(Glyco_hydro_42:Beta-galactosidase)
TRINITY_DN16746_c0_g2	Cluster 1		402.061	8.65127	2.26254e-12	3.61824e-10	yes	up
TRINITY_DN30055_c1_g2	Cluster 1		406.21	8.66608	2.3558e-12	3.75742e-10	yes	up
TRINITY_DN68841_c1_g4	Cluster 1		447.988	8.80732	2.41255e-12	3.83065e-10	yes	up					ENOG410Y65V(S:Function unknown)	ENOG410Y65V(Retrotransposon protein)	sp|P0C2F6|RNHX1_ARATH(Putative ribonuclease H protein At1g65750 OS=Arabidopsis thaliana OX=3702 GN=At1g65750 PE=3 SV=1)	PF13456(RVT_3:Reverse transcriptase-like)
TRINITY_DN5028_c0_g1	Cluster 1	adenine phosphoribosyltransferase 4-like [Physcomitrella patens]	3.73884	1.90259	2.65078e-12	4.17141e-10	yes	up	GO:0005737(cellular_component:cytoplasm); GO:0006168(biological_process:adenine salvage); GO:0003999(molecular_function:adenine phosphoribosyltransferase activity); GO:0009116(biological_process:nucleoside metabolic process)	K00759	APRT, apt	map00230(Purine metabolism)	COG0503(F:Nucleotide transport and metabolism)	COG0503(Catalyzes a salvage reaction resulting in the formation of AMP, that is energically less costly than de novo synthesis (By similarity))	sp|Q9SUW2|APT3_ARATH(Adenine phosphoribosyltransferase 3 OS=Arabidopsis thaliana OX=3702 GN=APT3 PE=1 SV=1)	PF00156(Pribosyltran:Phosphoribosyl transferase domain); PF14681(UPRTase:Uracil phosphoribosyltransferase)
TRINITY_DN26718_c0_g1	Cluster 1	uncharacterized protein LOC9655488 [Selaginella moellendorffii]	2.12544	1.08776	3.14828e-12	4.92142e-10	yes	up	GO:0009579(cellular_component:thylakoid); GO:0015995(biological_process:chlorophyll biosynthetic process); GO:0048529(molecular_function:magnesium-protoporphyrin IX monomethyl ester (oxidative) cyclase activity); GO:0009507(cellular_component:chloroplast)				ENOG4111TQT(S:Function unknown)	ENOG4111TQT(Protein of unknown function (DUF2488))	sp|P72777|YC54L_SYNY3(Ycf54-like protein OS=Synechocystis sp. (strain PCC 6803 / Kazusa) OX=1111708 GN=slr1780 PE=1 SV=1)	PF10674(Ycf54:Protein of unknown function (DUF2488))
TRINITY_DN29987_c0_g1	Cluster 1		2.56446	1.35866	3.52568e-12	5.43917e-10	yes	up
TRINITY_DN27363_c0_g1	Cluster 1	photosystem II reaction center PSB28 [Hymenophyllum caudiculatum]	2.56463	1.35875	3.8684e-12	5.91623e-10	yes	up	GO:0009535(cellular_component:chloroplast thylakoid membrane); GO:0016021(cellular_component:integral component of membrane); GO:0009654(cellular_component:photosystem II oxygen evolving complex); GO:0015979(biological_process:photosynthesis)	K08903	psb28	map00195(Photosynthesis)	ENOG4111V3V(H:Coenzyme transport and metabolism)	ENOG4111V3V(photosystem II reaction center)	sp|Q0JG75|PSB28_ORYSJ(Photosystem II reaction center PSB28 protein, chloroplastic OS=Oryza sativa subsp. japonica OX=39947 GN=PSB28 PE=2 SV=2)	PF03912(Psb28:Psb28 protein)
TRINITY_DN10911_c1_g1	Cluster 1		417.284	8.70489	3.92549e-12	5.99057e-10	yes	up
TRINITY_DN19216_c0_g1	Cluster 1		4.07332	2.02621	4.32769e-12	6.57595e-10	yes	up
TRINITY_DN468_c2_g1	Cluster 1		3.54333	1.82511	5.3819e-12	8.0515e-10	yes	up					COG0417(L:Replication, recombination and repair); ENOG410YZ0H(S:Function unknown); ENOG410XWAR(S:Function unknown)	COG0417(DNA polymerase); ENOG410YZ0H(UV radiation resistance); ENOG410XWAR(WD and tetratricopeptide repeats)
TRINITY_DN16219_c0_g1	Cluster 1		373.289	8.54415	5.53359e-12	8.24867e-10	yes	up
TRINITY_DN27204_c0_g1	Cluster 1	linamarin synthase 1 [Selaginella moellendorffii]	2.75551	1.46232	5.56272e-12	8.27464e-10	yes	up	GO:0016758(molecular_function:transferase activity, transferring hexosyl groups)	K13692	IAGLU		COG1819(S:Function unknown)	COG1819(Transferase)	sp|K4CWS6|U75C1_SOLLC(UDP-glycosyltransferase 75C1 OS=Solanum lycopersicum OX=4081 GN=UGT75C1 PE=1 SV=1)	PF00201(UDPGT:UDP-glucoronosyl and UDP-glucosyl transferase)
TRINITY_DN90656_c0_g1	Cluster 1		371.47	8.5371	6.10142e-12	9.019e-10	yes	up
TRINITY_DN8445_c0_g1	Cluster 1	hypothetical protein SELMODRAFT_109519 [Selaginella moellendorffii]	2.37159	1.24586	6.50837e-12	9.58046e-10	yes	up	GO:0016717(molecular_function:oxidoreductase activity, acting on paired donors, with oxidation of a pair of donors resulting in the reduction of molecular oxygen to two molecules of water); GO:0016021(cellular_component:integral component of membrane); GO:0006629(biological_process:lipid metabolic process)	K10257	FAD3, FAD7, FAD8, desB		COG3239(I:Lipid transport and metabolism)	COG3239(linoleoyl-CoA desaturase activity)	sp|P48620|FAD3C_SESIN(Omega-3 fatty acid desaturase, chloroplastic OS=Sesamum indicum OX=4182 GN=FAD7 PE=2 SV=1)	PF11960(DUF3474:Domain of unknown function (DUF3474)); PF00487(FA_desaturase:Fatty acid desaturase)
TRINITY_DN48296_c0_g2	Cluster 1	GDSL esterase/lipase At3g09930-like [Physcomitrella patens]	5.25634	2.39406	8.51274e-12	1.23508e-09	yes	up	GO:0016788(molecular_function:hydrolase activity, acting on ester bonds)				ENOG4111T31(S:Function unknown)	ENOG4111T31(GDSL esterase lipase)	sp|Q9LZS7|GDL71_ARATH(GDSL esterase/lipase At5g03610 OS=Arabidopsis thaliana OX=3702 GN=At5g03610 PE=2 SV=1)	PF00657(Lipase_GDSL:GDSL-like Lipase/Acylhydrolase)
TRINITY_DN5816_c0_g2	Cluster 1	probable receptor-like protein kinase At1g80640 isoform X2 [Selaginella moellendorffii]	2.18291	1.12625	1.62364e-11	2.27171e-09	yes	up	GO:0004674(molecular_function:protein serine/threonine kinase activity); GO:0016021(cellular_component:integral component of membrane); GO:0005524(molecular_function:ATP binding); GO:0004672(molecular_function:protein kinase activity)				COG0515(G:Carbohydrate transport and metabolism)	COG0515(Hydrolase)	sp|Q0V7T5|Y1864_ARATH(Probable receptor-like protein kinase At1g80640 OS=Arabidopsis thaliana OX=3702 GN=At1g80640 PE=2 SV=1)	PF00069(Pkinase:Protein kinase domain); PF07714(PK_Tyr_Ser-Thr:Protein tyrosine and serine/threonine kinase)
TRINITY_DN6521_c0_g1	Cluster 1	hypothetical protein SELMODRAFT_49560, partial [Selaginella moellendorffii]	3.65911	1.87149	1.79668e-11	2.49898e-09	yes	up	GO:0009733(biological_process:response to auxin)	K14488	SAUR	map04075(Plant hormone signal transduction)	ENOG4111771(S:Function unknown)	ENOG4111771(auxin-induced protein)	sp|Q9FJG1|SAU19_ARATH(Auxin-responsive protein SAUR19 OS=Arabidopsis thaliana OX=3702 GN=SAUR19 PE=2 SV=1)	PF02519(Auxin_inducible:Auxin responsive protein)
TRINITY_DN14974_c0_g2	Cluster 1		324.355	8.34143	2.00607e-11	2.76302e-09	yes	up
TRINITY_DN8569_c1_g1	Cluster 1	hypothetical protein AXG93_2145s1510 [Marchantia polymorpha subsp. ruderalis]	146.299	7.19278	2.37982e-11	3.22128e-09	yes	up					ENOG4111MK6(S:Function unknown)	ENOG4111MK6(Retrotransposon protein)	sp|O00370|LORF2_HUMAN(LINE-1 retrotransposable element ORF2 protein OS=Homo sapiens OX=9606 PE=1 SV=1)	PF00078(RVT_1:Reverse transcriptase (RNA-dependent DNA polymerase))
TRINITY_DN14870_c0_g2	Cluster 1	ABC transporter G family member 22-like [Physcomitrella patens]	67.6792	6.08064	2.65324e-11	3.5573e-09	yes	up	GO:0016021(cellular_component:integral component of membrane); GO:0016887(molecular_function:ATPase activity); GO:0005524(molecular_function:ATP binding)				COG1131(S:Function unknown)	COG1131(-)	sp|Q93YS4|AB22G_ARATH(ABC transporter G family member 22 OS=Arabidopsis thaliana OX=3702 GN=ABCG22 PE=1 SV=1)	PF01061(ABC2_membrane:ABC-2 type transporter); PF19055(ABC2_membrane_7:ABC-2 type transporter); PF12698(ABC2_membrane_3:ABC-2 family transporter protein)
TRINITY_DN49905_c0_g2	Cluster 1		315.185	8.30005	2.90838e-11	3.85549e-09	yes	up
TRINITY_DN18206_c1_g1	Cluster 1	uncharacterized protein LOC112342454 [Selaginella moellendorffii]	3.91481	1.96894	3.49837e-11	4.57749e-09	yes	up	GO:0004523(molecular_function:RNA-DNA hybrid ribonuclease activity); GO:0003676(molecular_function:nucleic acid binding)						sp|Q9HSF6|RNH_HALSA(Ribonuclease HI OS=Halobacterium salinarum (strain ATCC 700922 / JCM 11081 / NRC-1) OX=64091 GN=rnhA PE=1 SV=1)	PF13456(RVT_3:Reverse transcriptase-like); PF00075(RNase_H:RNase H)
TRINITY_DN17438_c0_g1	Cluster 1	peptidyl-prolyl cis-trans isomerase CYP38, chloroplastic-like [Physcomitrella patens]	2.36731	1.24325	4.09452e-11	5.29865e-09	yes	up	GO:0009535(cellular_component:chloroplast thylakoid membrane); GO:0009570(cellular_component:chloroplast stroma); GO:0016021(cellular_component:integral component of membrane); GO:0031977(cellular_component:thylakoid lumen); GO:0042742(biological_process:defense response to bacterium); GO:0003755(molecular_function:peptidyl-prolyl cis-trans isomerase activity)				COG0652(O:Posttranslational modification, protein turnover, chaperones)	COG0652(peptidyl-prolyl cis-trans isomerase activity)	sp|O49939|TLP40_SPIOL(Peptidyl-prolyl cis-trans isomerase, chloroplastic OS=Spinacia oleracea OX=3562 GN=TLP40 PE=1 SV=1)	PF00160(Pro_isomerase:Cyclophilin type peptidyl-prolyl cis-trans isomerase/CLD)
TRINITY_DN46702_c2_g1	Cluster 1		66.4458	6.05411	4.22338e-11	5.45542e-09	yes	up
TRINITY_DN35348_c0_g2	Cluster 1		306.057	8.25766	4.26415e-11	5.48802e-09	yes	up
TRINITY_DN26657_c0_g2	Cluster 1	probable ADP,ATP carrier protein At5g56450 [Selaginella moellendorffii]	2.54245	1.34622	4.76411e-11	6.09814e-09	yes	up	GO:0005347(molecular_function:ATP transmembrane transporter activity); GO:0016021(cellular_component:integral component of membrane); GO:0005743(cellular_component:mitochondrial inner membrane)	K05863	SLC25A4S, ANT		ENOG410XNW0(U:Intracellular trafficking, secretion, and vesicular transport)	ENOG410XNW0(transmembrane transport)	sp|Q9FM86|ADT5_ARATH(Probable ADP,ATP carrier protein At5g56450 OS=Arabidopsis thaliana OX=3702 GN=At5g56450 PE=2 SV=1)	PF00153(Mito_carr:Mitochondrial carrier protein)
TRINITY_DN15138_c0_g2	Cluster 1		2.82853	1.50005	4.87271e-11	6.21465e-09	yes	up
TRINITY_DN33827_c0_g1	Cluster 1		16.6954	4.06138	5.00383e-11	6.37037e-09	yes	up
TRINITY_DN29728_c0_g1	Cluster 1		3.83889	1.94069	5.02809e-11	6.38975e-09	yes	up					ENOG41113DG(S:Function unknown)	ENOG41113DG(-)
TRINITY_DN9428_c0_g1	Cluster 1		328.193	8.3584	5.21961e-11	6.62122e-09	yes	up
TRINITY_DN7426_c0_g1	Cluster 1	hypothetical protein MARPO_0021s0058 [Marchantia polymorpha]	3.49153	1.80386	5.79964e-11	7.2657e-09	yes	up	GO:0016021(cellular_component:integral component of membrane)	K07297	ADIPOR		COG1272(S:Function unknown)	COG1272(Channel protein (Hemolysin III family)	sp|Q9SZG0|HHP4_ARATH(Heptahelical transmembrane protein 4 OS=Arabidopsis thaliana OX=3702 GN=HHP4 PE=2 SV=1)	PF03006(HlyIII:Haemolysin-III related)
TRINITY_DN16334_c0_g1	Cluster 1		309.65	8.27449	5.82212e-11	7.28095e-09	yes	up
TRINITY_DN2404_c0_g4	Cluster 1		170.426	7.413	6.60023e-11	8.16729e-09	yes	up
TRINITY_DN1085_c0_g1	Cluster 1		10.8018	3.4332	6.87407e-11	8.46169e-09	yes	up
TRINITY_DN59755_c0_g1	Cluster 1	acid phosphatase 1-like isoform X1 [Physcomitrella patens]	5.50839	2.46163	8.43149e-11	1.03248e-08	yes	up	GO:0016021(cellular_component:integral component of membrane)				ENOG410YCRN(S:Function unknown)	ENOG410YCRN(Acid phosphatase)	sp|P27061|PPA1_SOLLC(Acid phosphatase 1 OS=Solanum lycopersicum OX=4081 GN=APS1 PE=2 SV=1)	PF03767(Acid_phosphat_B:HAD superfamily, subfamily IIIB (Acid phosphatase))
TRINITY_DN2557_c0_g1	Cluster 1		3.02556	1.5972	1.05148e-10	1.27217e-08	yes	up					ENOG410YNJG(S:Function unknown)	ENOG410YNJG(Proline-rich protein)	sp|Q9T0I5|PRP4_ARATH(Proline-rich protein 4 OS=Arabidopsis thaliana OX=3702 GN=PRP4 PE=2 SV=1)	PF01190(Pollen_Ole_e_1:Pollen protein Ole e 1 like)
TRINITY_DN77094_c0_g1	Cluster 1	hypothetical protein PHYPA_016645 [Physcomitrella patens]	60.6189	5.9217	1.13541e-10	1.36436e-08	yes	up	GO:0008270(molecular_function:zinc ion binding)							PF04434(SWIM:SWIM zinc finger)
TRINITY_DN8201_c0_g1	Cluster 1	blue-light photoreceptor PHR2-like isoform X2 [Physcomitrella patens]	2.04509	1.03216	1.70078e-10	1.9929e-08	yes	up					COG0415(G:Carbohydrate transport and metabolism)	COG0415(Transporter)	sp|Q8LB72|PHR2_ARATH(Blue-light photoreceptor PHR2 OS=Arabidopsis thaliana OX=3702 GN=PHR2 PE=2 SV=2)	PF00875(DNA_photolyase:DNA photolyase)
TRINITY_DN11528_c0_g1	Cluster 1		31.0094	4.95463	1.70617e-10	1.99591e-08	yes	up
TRINITY_DN9760_c0_g1	Cluster 1		2.98454	1.57751	1.93011e-10	2.25042e-08	yes	up
TRINITY_DN1552_c0_g1	Cluster 1	hypothetical protein MARPO_0065s0029 [Marchantia polymorpha]	2.02486	1.01782	1.94835e-10	2.26795e-08	yes	up	GO:0006012(biological_process:galactose metabolic process); GO:0003978(molecular_function:UDP-glucose 4-epimerase activity); GO:0050662(molecular_function:coenzyme binding)	K01784	galE, GALE	map00520(Amino sugar and nucleotide sugar metabolism); map00052(Galactose metabolism)	COG1087(M:Cell wall/membrane/envelope biogenesis)	COG1087(udp-glucose 4-epimerase)	sp|Q42605|UGE1_ARATH(Bifunctional UDP-glucose 4-epimerase and UDP-xylose 4-epimerase 1 OS=Arabidopsis thaliana OX=3702 GN=UGE1 PE=1 SV=2)	PF16363(GDP_Man_Dehyd:GDP-mannose 4,6 dehydratase); PF01370(Epimerase:NAD dependent epimerase/dehydratase family); PF02719(Polysacc_synt_2:Polysaccharide biosynthesis protein); PF01073(3Beta_HSD:3-beta hydroxysteroid dehydrogenase/isomerase family); PF04321(RmlD_sub_bind:RmlD substrate binding domain); PF00106(adh_short:short chain dehydrogenase); PF13460(NAD_binding_10:NAD(P)H-binding); PF07993(…
TRINITY_DN22320_c0_g5	Cluster 1		290.525	8.18252	2.22567e-10	2.54878e-08	yes	up
TRINITY_DN26214_c0_g1	Cluster 1	hypothetical protein AXG93_1040s1390 [Marchantia polymorpha subsp. ruderalis]	3.07	1.61824	2.24177e-10	2.56306e-08	yes	up	GO:0006633(biological_process:fatty acid biosynthetic process); GO:0016021(cellular_component:integral component of membrane); GO:0016747(molecular_function:transferase activity, transferring acyl groups other than amino-acyl groups)	K15397	KCS	map04626(Plant-pathogen interaction); map00062(Fatty acid elongation)	ENOG410Y5VH(I:Lipid transport and metabolism)	ENOG410Y5VH(3-ketoacyl-coa synthase)	sp|Q5XEP9|KCS2_ARATH(3-ketoacyl-CoA synthase 2 OS=Arabidopsis thaliana OX=3702 GN=KCS2 PE=2 SV=2)	PF08392(FAE1_CUT1_RppA:FAE1/Type III polyketide synthase-like protein); PF08541(ACP_syn_III_C:3-Oxoacyl-[acyl-carrier-protein (ACP)] synthase III C terminal); PF02797(Chal_sti_synt_C:Chalcone and stilbene synthases, C-terminal domain); PF08545(ACP_syn_III:3-Oxoacyl-[acyl-carrier-protein (ACP)] synthase III)
TRINITY_DN17374_c1_g1	Cluster 1		4.42866	2.14687	2.30894e-10	2.63559e-08	yes	up
TRINITY_DN27441_c0_g1	Cluster 1	hypothetical protein AXG93_815s1540 [Marchantia polymorpha subsp. ruderalis]	16.0364	4.00328	2.35793e-10	2.68716e-08	yes	up							sp|P0C2F6|RNHX1_ARATH(Putative ribonuclease H protein At1g65750 OS=Arabidopsis thaliana OX=3702 GN=At1g65750 PE=3 SV=1)	PF13456(RVT_3:Reverse transcriptase-like); PF13966(zf-RVT:zinc-binding in reverse transcriptase)
TRINITY_DN14776_c0_g1	Cluster 1		8.25804	3.0458	2.37984e-10	2.70777e-08	yes	up
TRINITY_DN34277_c0_g1	Cluster 1		8.28831	3.05108	2.39913e-10	2.72533e-08	yes	up
TRINITY_DN16784_c0_g1	Cluster 1	serine carboxypeptidase-like 44 [Selaginella moellendorffii]	2.90997	1.541	2.45098e-10	2.77976e-08	yes	up	GO:0004185(molecular_function:serine-type carboxypeptidase activity)	K16297	SCPL-II		COG2939(E:Amino acid transport and metabolism)	COG2939(carboxy-peptidase)	sp|Q93Y09|SCP45_ARATH(Serine carboxypeptidase-like 45 OS=Arabidopsis thaliana OX=3702 GN=SCPL45 PE=2 SV=1)	PF00450(Peptidase_S10:Serine carboxypeptidase)
TRINITY_DN718_c0_g1	Cluster 1	ATP-dependent zinc metalloprotease FTSH, chloroplastic [Selaginella moellendorffii]	2.39476	1.25988	2.72398e-10	3.05021e-08	yes	up	GO:0016021(cellular_component:integral component of membrane); GO:0016020(cellular_component:membrane); GO:0004222(molecular_function:metalloendopeptidase activity); GO:0005524(molecular_function:ATP binding)	K03798	ftsH, hflB		COG0465(S:Function unknown)	COG0465(-)	sp|O82150|FTSH_TOBAC(ATP-dependent zinc metalloprotease FTSH, chloroplastic OS=Nicotiana tabacum OX=4097 GN=FTSH PE=2 SV=2)	PF01434(Peptidase_M41:Peptidase family M41); PF00004(AAA:ATPase family associated with various cellular activities (AAA)); PF17862(AAA_lid_3:AAA+ lid domain); PF07728(AAA_5:AAA domain (dynein-related subfamily)); PF13191(AAA_16:AAA ATPase domain)
TRINITY_DN21787_c0_g1	Cluster 1		251.783	7.97604	2.78611e-10	3.10993e-08	yes	up
TRINITY_DN13436_c0_g1	Cluster 1		24.7828	4.63127	2.80055e-10	3.12111e-08	yes	up
TRINITY_DN2460_c0_g1	Cluster 1	protochlorophyllide reductase-like [Physcomitrella patens]	2.18948	1.13059	2.9479e-10	3.26472e-08	yes	up	GO:0015995(biological_process:chlorophyll biosynthetic process); GO:0015979(biological_process:photosynthesis); GO:0016630(molecular_function:protochlorophyllide reductase activity); GO:0009507(cellular_component:chloroplast)	K00218	por	map00860(Porphyrin and chlorophyll metabolism)	COG1028(S:Function unknown)	COG1028(Dehydrogenase reductase)	sp|Q41249|PORA_CUCSA(Protochlorophyllide reductase, chloroplastic OS=Cucumis sativus OX=3659 GN=PORA PE=2 SV=1)	PF00106(adh_short:short chain dehydrogenase); PF13561(adh_short_C2:Enoyl-(Acyl carrier protein) reductase); PF08659(KR:KR domain)
TRINITY_DN49770_c0_g1	Cluster 1	thiocyanate methyltransferase 1 isoform X1 [Selaginella moellendorffii]	8.80544	3.1384	3.21652e-10	3.54555e-08	yes	up	GO:0008757(molecular_function:S-adenosylmethionine-dependent methyltransferase activity)	K21552	HOL		COG0500(Q:Secondary metabolites biosynthesis, transport and catabolism)	COG0500(Methyltransferase)	sp|Q0WP12|HOL1_ARATH(Thiocyanate methyltransferase 1 OS=Arabidopsis thaliana OX=3702 GN=HOL1 PE=1 SV=2)	PF05724(TPMT:Thiopurine S-methyltransferase (TPMT)); PF13847(Methyltransf_31:Methyltransferase domain); PF13649(Methyltransf_25:Methyltransferase domain); PF08242(Methyltransf_12:Methyltransferase domain); PF08241(Methyltransf_11:Methyltransferase domain)
TRINITY_DN42305_c0_g1	Cluster 1		276.04	8.10873	3.23781e-10	3.56345e-08	yes	up
TRINITY_DN40687_c0_g1	Cluster 1		24.971	4.64218	3.57162e-10	3.89445e-08	yes	up
TRINITY_DN2338_c0_g1	Cluster 1		2.13309	1.09294	3.87919e-10	4.21032e-08	yes	up
TRINITY_DN8706_c0_g2	Cluster 1	UDP-glycosyltransferase 85A3 [Selaginella moellendorffii]	2.07217	1.05114	4.04332e-10	4.36963e-08	yes	up	GO:0016758(molecular_function:transferase activity, transferring hexosyl groups)	K23260	TOGT1	map00940(Phenylpropanoid biosynthesis)	COG1819(S:Function unknown)	COG1819(Transferase)	sp|Q9AT54|SCGT_TOBAC(Scopoletin glucosyltransferase OS=Nicotiana tabacum OX=4097 GN=TOGT1 PE=1 SV=1)	PF00201(UDPGT:UDP-glucoronosyl and UDP-glucosyl transferase)
TRINITY_DN8605_c0_g1	Cluster 1		2.76821	1.46895	4.14212e-10	4.46824e-08	yes	up					ENOG410YR2X(S:Function unknown)	ENOG410YR2X(-)
TRINITY_DN12678_c0_g1	Cluster 1	chloroplast unusual positioning 1A [Adiantum capillus-veneris]	3.14155	1.65148	4.36265e-10	4.68468e-08	yes	up					ENOG410YEKY(S:Function unknown)	ENOG410YEKY(-)	sp|Q9LI74|CHUP1_ARATH(Protein CHUP1, chloroplastic OS=Arabidopsis thaliana OX=3702 GN=CHUP1 PE=1 SV=1)
TRINITY_DN6478_c0_g2	Cluster 1		254.903	7.9938	4.5942e-10	4.88874e-08	yes	up
TRINITY_DN59338_c0_g1	Cluster 1		7.66934	2.9391	5.13713e-10	5.44189e-08	yes	up							sp|P0C2F6|RNHX1_ARATH(Putative ribonuclease H protein At1g65750 OS=Arabidopsis thaliana OX=3702 GN=At1g65750 PE=3 SV=1)	PF13966(zf-RVT:zinc-binding in reverse transcriptase)
TRINITY_DN2883_c0_g1	Cluster 1		231.707	7.85616	5.81812e-10	6.11743e-08	yes	up
TRINITY_DN8362_c0_g1	Cluster 1		4.84478	2.27643	6.12136e-10	6.38873e-08	yes	up
TRINITY_DN976_c0_g1	Cluster 1	protein NRT1/ PTR FAMILY 3.1 [Selaginella moellendorffii]	2.21788	1.14918	6.14166e-10	6.40046e-08	yes	up	GO:0006857(biological_process:oligopeptide transport); GO:0022857(molecular_function:transmembrane transporter activity); GO:0016021(cellular_component:integral component of membrane)				COG3104(E:Amino acid transport and metabolism)	COG3104(transporter)	sp|Q9LV10|PTR53_ARATH(Protein NRT1/ PTR FAMILY 2.11 OS=Arabidopsis thaliana OX=3702 GN=NPF2.11 PE=1 SV=1)	PF00854(PTR2:POT family)
TRINITY_DN2526_c0_g1	Cluster 1	hypothetical protein AXG93_1429s1030 [Marchantia polymorpha subsp. ruderalis]	2.16326	1.1132	6.20588e-10	6.4389e-08	yes	up					ENOG410XS82(S:Function unknown); ENOG4111SG9(S:Function unknown); ENOG410YRUW(S:Function unknown); ENOG4111K5V(S:Function unknown)	ENOG410XS82(Retrotransposon protein); ENOG4111SG9(Reverse transcriptase (RNA-dependent DNA polymerase)); ENOG410YRUW(reverse transcriptase); ENOG4111K5V(Reverse transcriptase (RNA-dependent DNA polymerase))	sp|O00370|LORF2_HUMAN(LINE-1 retrotransposable element ORF2 protein OS=Homo sapiens OX=9606 PE=1 SV=1)	PF00078(RVT_1:Reverse transcriptase (RNA-dependent DNA polymerase))
TRINITY_DN25497_c1_g2	Cluster 1		13.5024	3.75514	6.55236e-10	6.75558e-08	yes	up
TRINITY_DN5534_c0_g2	Cluster 1		107.694	6.75079	6.55891e-10	6.75558e-08	yes	up
TRINITY_DN24556_c0_g1	Cluster 1	uncharacterized protein LOC112341862 [Selaginella moellendorffii]	5.03154	2.331	6.73612e-10	6.91794e-08	yes	up	GO:0015074(biological_process:DNA integration); GO:0003676(molecular_function:nucleic acid binding)	K14560	IMP3	map03008(Ribosome biogenesis in eukaryotes)	COG2801(L:Replication, recombination and repair); ENOG4111WQF(S:Function unknown)	COG2801(Retrotransposon protein); ENOG4111WQF(-)	sp|P10978|POLX_TOBAC(Retrovirus-related Pol polyprotein from transposon TNT 1-94 OS=Nicotiana tabacum OX=4097 PE=2 SV=1)
TRINITY_DN38884_c0_g2	Cluster 1		233.818	7.86924	7.06417e-10	7.21291e-08	yes	up
TRINITY_DN16147_c0_g3	Cluster 1		227.364	7.82886	7.10182e-10	7.24088e-08	yes	up
TRINITY_DN17841_c0_g1	Cluster 1	LOW QUALITY PROTEIN: hypothetical protein MARPO_2248s0001 [Marchantia polymorpha]	23.7774	4.57152	7.60074e-10	7.67208e-08	yes	up					ENOG4111JHC(S:Function unknown); ENOG41123AA(S:Function unknown)	ENOG4111JHC(senescence-associated protein); ENOG41123AA(-)
TRINITY_DN27602_c0_g2	Cluster 1		107.537	6.74869	7.65043e-10	7.71122e-08	yes	up
TRINITY_DN970_c0_g1	Cluster 1	nucleoside diphosphate kinase II, chloroplastic [Selaginella moellendorffii]	2.23123	1.15784	7.69222e-10	7.7423e-08	yes	up	GO:0006220(biological_process:pyrimidine nucleotide metabolic process); GO:0006228(biological_process:UTP biosynthetic process); GO:0070301(biological_process:cellular response to hydrogen peroxide); GO:0006163(biological_process:purine nucleotide metabolic process); GO:0006241(biological_process:CTP biosynthetic process); GO:0004550(molecular_function:nucleoside diphosphate kinase activity); GO:…	K00940	ndk, NME	map00240(Pyrimidine metabolism); map04016(MAPK signaling pathway - plant); map00230(Purine metabolism)	COG0105(F:Nucleotide transport and metabolism)	COG0105(Major role in the synthesis of nucleoside triphosphates other than ATP. The ATP gamma phosphate is transferred to the NDP beta phosphate via a ping-pong mechanism, using a phosphorylated active-site intermediate (By similarity))	sp|Q01402|NDK2_SPIOL(Nucleoside diphosphate kinase 2, chloroplastic OS=Spinacia oleracea OX=3562 GN=NDPK2 PE=1 SV=1)	PF00334(NDK:Nucleoside diphosphate kinase)
TRINITY_DN34893_c0_g1	Cluster 1	uncharacterized protein LOC112276082 [Physcomitrella patens]	2.03366	1.02408	9.33895e-10	9.28867e-08	yes	up	GO:0005737(cellular_component:cytoplasm); GO:0003746(molecular_function:translation elongation factor activity); GO:0045454(biological_process:cell redox homeostasis); GO:0016021(cellular_component:integral component of membrane); GO:0005623(cellular_component:cell)	K02356	efp		COG0231(A:RNA processing and modification)	COG0231(Protein CWC15 homolog)	sp|B0JHV3|EFP_MICAN(Elongation factor P OS=Microcystis aeruginosa (strain NIES-843) OX=449447 GN=efp PE=3 SV=1)	PF09285(Elong-fact-P_C:Elongation factor P, C-terminal); PF01132(EFP:Elongation factor P (EF-P) OB domain); PF08207(EFP_N:Elongation factor P (EF-P) KOW-like domain)
TRINITY_DN1314_c1_g1	Cluster 1	probable inositol transporter 2 isoform X2 [Selaginella moellendorffii]	2.21702	1.14862	9.68534e-10	9.58455e-08	yes	up	GO:0022857(molecular_function:transmembrane transporter activity); GO:0016021(cellular_component:integral component of membrane)	K08150	SLC2A13, ITR		ENOG410XNQK(G:Carbohydrate transport and metabolism)	ENOG410XNQK(Transporter)	sp|O23492|INT4_ARATH(Inositol transporter 4 OS=Arabidopsis thaliana OX=3702 GN=INT4 PE=1 SV=1)	PF00083(Sugar_tr:Sugar (and other) transporter); PF07690(MFS_1:Major Facilitator Superfamily); PF06609(TRI12:Fungal trichothecene efflux pump (TRI12))
TRINITY_DN63509_c0_g1	Cluster 1		187.889	7.55374	1.0366e-09	1.02153e-07	yes	up								PF07899(Frigida:Frigida-like protein)
TRINITY_DN77181_c0_g2	Cluster 1	ethylene-responsive transcription factor ERF003-like [Physcomitrella patens]	2.22892	1.15634	1.067e-09	1.04275e-07	yes	up	GO:0003700(molecular_function:transcription factor activity, sequence-specific DNA binding); GO:0005634(cellular_component:nucleus); GO:0003677(molecular_function:DNA binding)				ENOG4111RRZ(K:Transcription)	ENOG4111RRZ(Transcription factor)	sp|Q94AW5|ERF03_ARATH(Ethylene-responsive transcription factor ERF003 OS=Arabidopsis thaliana OX=3702 GN=ERF003 PE=2 SV=1)	PF00847(AP2:AP2 domain)
TRINITY_DN10757_c0_g5	Cluster 1		233.402	7.86668	1.07401e-09	1.04815e-07	yes	up
TRINITY_DN15373_c0_g2	Cluster 1		221.707	7.79251	1.16114e-09	1.12542e-07	yes	up
TRINITY_DN11475_c5_g1	Cluster 1		186.908	7.54619	1.16496e-09	1.12629e-07	yes	up
TRINITY_DN68952_c0_g4	Cluster 1	uncharacterized protein LOC112345739 [Selaginella moellendorffii]	183.785	7.52187	1.29437e-09	1.23757e-07	yes	up	GO:0015074(biological_process:DNA integration); GO:0003676(molecular_function:nucleic acid binding)				COG2801(L:Replication, recombination and repair)	COG2801(Retrotransposon protein)
TRINITY_DN14757_c0_g2	Cluster 1		213.391	7.73735	1.32427e-09	1.26444e-07	yes	up
TRINITY_DN18062_c0_g1	Cluster 1		218.915	7.77423	1.45374e-09	1.36773e-07	yes	up
TRINITY_DN69871_c0_g2	Cluster 1		220.395	7.78395	1.54194e-09	1.44495e-07	yes	up					ENOG410XWAR(S:Function unknown); ENOG410YZ0H(S:Function unknown); COG0417(L:Replication, recombination and repair)	ENOG410XWAR(WD and tetratricopeptide repeats); ENOG410YZ0H(UV radiation resistance); COG0417(DNA polymerase)
TRINITY_DN11691_c0_g1	Cluster 1	glycerophosphodiester phosphodiesterase GDPDL4 [Selaginella moellendorffii]	2.37839	1.24999	1.54751e-09	1.44825e-07	yes	up	GO:0006629(biological_process:lipid metabolic process); GO:0008081(molecular_function:phosphoric diester hydrolase activity)				COG0584(C:Energy production and conversion)	COG0584(glycerophosphoryl diester phosphodiesterase)	sp|Q9SZ11|GPDL3_ARATH(Glycerophosphodiester phosphodiesterase GDPDL3 OS=Arabidopsis thaliana OX=3702 GN=GDPDL3 PE=2 SV=3)	PF03009(GDPD:Glycerophosphoryl diester phosphodiesterase family)
TRINITY_DN41750_c0_g2	Cluster 1		227.262	7.82821	1.55182e-09	1.45036e-07	yes	up
TRINITY_DN5765_c1_g1	Cluster 1	ATP synthase subunit beta, mitochondrial-like [Physcomitrella patens]	2.0173	1.01242	1.6144e-09	1.5009e-07	yes	up	GO:0045261(cellular_component:proton-transporting ATP synthase complex, catalytic core F(1)); GO:0009535(cellular_component:chloroplast thylakoid membrane); GO:0015986(biological_process:ATP synthesis coupled proton transport); GO:0005524(molecular_function:ATP binding); GO:0046933(molecular_function:proton-transporting ATP synthase activity, rotational mechanism)	K02133	ATPeF1B, ATP5B, ATP2	map00190(Oxidative phosphorylation)	COG0055(C:Energy production and conversion)	COG0055(Produces ATP from ADP in the presence of a proton gradient across the membrane. The catalytic sites are hosted primarily by the beta subunits (By similarity))	sp|Q01859|ATPBM_ORYSJ(ATP synthase subunit beta, mitochondrial OS=Oryza sativa subsp. japonica OX=39947 GN=ATPB PE=1 SV=2)	PF02874(ATP-synt_ab_N:ATP synthase alpha/beta family, beta-barrel domain); PF11421(Synthase_beta:ATP synthase F1 beta subunit); PF00006(ATP-synt_ab:ATP synthase alpha/beta family, nucleotide-binding domain)
TRINITY_DN42025_c0_g1	Cluster 1		236.764	7.88731	1.65642e-09	1.53554e-07	yes	up					ENOG410Y65V(S:Function unknown); ENOG4111MK6(S:Function unknown)	ENOG410Y65V(Retrotransposon protein); ENOG4111MK6(Retrotransposon protein)	sp|P0C2F6|RNHX1_ARATH(Putative ribonuclease H protein At1g65750 OS=Arabidopsis thaliana OX=3702 GN=At1g65750 PE=3 SV=1)
TRINITY_DN2883_c0_g2	Cluster 1		231.684	7.85602	1.81121e-09	1.66633e-07	yes	up
TRINITY_DN1950_c0_g1	Cluster 1	hypothetical protein MARPO_0019s0173 [Marchantia polymorpha]	2.28717	1.19356	1.825e-09	1.67684e-07	yes	up	GO:0005506(molecular_function:iron ion binding); GO:0008610(biological_process:lipid biosynthetic process); GO:0016021(cellular_component:integral component of membrane); GO:0016491(molecular_function:oxidoreductase activity)				ENOG410Y1F6(S:Function unknown)	ENOG410Y1F6(WAX2 C-terminal domain)	sp|Q8H1Z0|CER3_ARATH(Very-long-chain aldehyde decarbonylase CER3 OS=Arabidopsis thaliana OX=3702 GN=CER3 PE=1 SV=1)	PF12076(Wax2_C:WAX2 C-terminal domain); PF04116(FA_hydroxylase:Fatty acid hydroxylase superfamily); PF00106(adh_short:short chain dehydrogenase)
TRINITY_DN17744_c0_g2	Cluster 1		205.187	7.6808	1.89522e-09	1.73011e-07	yes	up
TRINITY_DN23686_c0_g4	Cluster 1		11.0015	3.45963	1.94601e-09	1.77418e-07	yes	up
TRINITY_DN4445_c0_g3	Cluster 1		174.18	7.44444	2.13161e-09	1.93094e-07	yes	up
TRINITY_DN9239_c0_g1	Cluster 1	DExH-box ATP-dependent RNA helicase DExH11-like isoform X2 [Physcomitrella patens]	3.79684	1.9248	2.16515e-09	1.95631e-07	yes	up	GO:0006401(biological_process:RNA catabolic process); GO:0003724(molecular_function:RNA helicase activity); GO:0003723(molecular_function:RNA binding); GO:0005524(molecular_function:ATP binding)	K12599	SKI2, SKIV2L	map03018(RNA degradation)	COG4581(L:Replication, recombination and repair)	COG4581(helicase)	sp|F4JAA5|SKI2_ARATH(DExH-box ATP-dependent RNA helicase DExH11 OS=Arabidopsis thaliana OX=3702 GN=SKI2 PE=1 SV=1)
TRINITY_DN8468_c0_g1	Cluster 1		3.2386	1.69537	2.38985e-09	2.14561e-07	yes	up					ENOG410Z0M7(K:Transcription)	ENOG410Z0M7(transcription factor bHLH135-like)	sp|Q8GW32|PRE6_ARATH(Transcription factor PRE6 OS=Arabidopsis thaliana OX=3702 GN=PRE6 PE=1 SV=1)	PF00010(HLH:Helix-loop-helix DNA-binding domain)
TRINITY_DN38617_c0_g1	Cluster 1		204.215	7.67394	2.49687e-09	2.23885e-07	yes	up
TRINITY_DN7021_c0_g1	Cluster 1	hypothetical protein AXG93_1864s1060 [Marchantia polymorpha subsp. ruderalis]	2.013	1.00935	2.61318e-09	2.33426e-07	yes	up	GO:0003735(molecular_function:structural constituent of ribosome); GO:0015934(cellular_component:large ribosomal subunit); GO:0006412(biological_process:translation)	K02876	RP-L15, MRPL15, rplO	map03010(Ribosome)	COG0200(S:Function unknown)	COG0200(DNA binding protein)	sp|P22798|RK15_SPIOL(50S ribosomal protein L15, chloroplastic OS=Spinacia oleracea OX=3562 GN=RPL15 PE=1 SV=3)	PF00828(Ribosomal_L27A:Ribosomal proteins 50S-L15, 50S-L18e, 60S-L27A)
TRINITY_DN66692_c1_g1	Cluster 1		197.103	7.62281	2.67224e-09	2.38099e-07	yes	up
TRINITY_DN39004_c0_g1	Cluster 1		195.059	7.60777	2.97012e-09	2.62653e-07	yes	up
TRINITY_DN433_c0_g4	Cluster 1	hypothetical protein SELMODRAFT_23468, partial [Selaginella moellendorffii]	2.11655	1.08171	2.98002e-09	2.63199e-07	yes	up	GO:0005737(cellular_component:cytoplasm); GO:0007017(biological_process:microtubule-based process); GO:0003924(molecular_function:GTPase activity); GO:0005200(molecular_function:structural constituent of cytoskeleton); GO:0005874(cellular_component:microtubule); GO:0005525(molecular_function:GTP binding)	K07375	TUBB	map04145(Phagosome)	COG5023(S:Function unknown)	COG5023(SAM domain (Sterile alpha motif))	sp|Q43594|TBB1_ORYSJ(Tubulin beta-1 chain OS=Oryza sativa subsp. japonica OX=39947 GN=TUBB1 PE=2 SV=2)	PF00091(Tubulin:Tubulin/FtsZ family, GTPase domain); PF03953(Tubulin_C:Tubulin C-terminal domain); PF13809(Tubulin_2:Tubulin like)
TRINITY_DN8570_c0_g3	Cluster 1		194.641	7.60468	3.10555e-09	2.73261e-07	yes	up
TRINITY_DN7805_c1_g2	Cluster 1		3.89612	1.96204	3.2909e-09	2.87779e-07	yes	up
TRINITY_DN42126_c0_g3	Cluster 1		221.375	7.79035	3.36053e-09	2.93142e-07	yes	up
TRINITY_DN6894_c0_g3	Cluster 1		193.971	7.5997	3.75433e-09	3.25485e-07	yes	up							sp|Q8VXY4|TIPRL_ARATH(TIP41-like protein OS=Arabidopsis thaliana OX=3702 GN=TIP41L PE=2 SV=1)
TRINITY_DN1211_c0_g1	Cluster 1	pectinesterase [Selaginella moellendorffii]	2.39058	1.25736	3.81386e-09	3.30241e-07	yes	up	GO:0042545(biological_process:cell wall modification); GO:0005618(cellular_component:cell wall); GO:0016021(cellular_component:integral component of membrane); GO:0030599(molecular_function:pectinesterase activity); GO:0005576(cellular_component:extracellular region); GO:0045330(molecular_function:aspartyl esterase activity); GO:0004857(molecular_function:enzyme inhibitor activity); GO:0045490(bi…	K01051	E3.1.1.11	map00040(Pentose and glucuronate interconversions)	COG4677(G:Carbohydrate transport and metabolism)	COG4677(pectinesterase)	sp|Q42534|PME2_ARATH(Pectinesterase 2 OS=Arabidopsis thaliana OX=3702 GN=PME2 PE=2 SV=2)	PF01095(Pectinesterase:Pectinesterase); PF04043(PMEI:Plant invertase/pectin methylesterase inhibitor)
TRINITY_DN30226_c1_g1	Cluster 1		18.5335	4.21207	4.02305e-09	3.47434e-07	yes	up
TRINITY_DN35564_c0_g1	Cluster 1		2.48314	1.31217	4.07799e-09	3.51388e-07	yes	up
TRINITY_DN15740_c0_g1	Cluster 1		46.342	5.53425	4.65756e-09	3.96493e-07	yes	up							sp|P0C2F6|RNHX1_ARATH(Putative ribonuclease H protein At1g65750 OS=Arabidopsis thaliana OX=3702 GN=At1g65750 PE=3 SV=1)	PF13966(zf-RVT:zinc-binding in reverse transcriptase)
TRINITY_DN5398_c0_g1	Cluster 1	hypothetical protein AXG93_698s1030 [Marchantia polymorpha subsp. ruderalis]	2.25021	1.17006	5.05856e-09	4.28564e-07	yes	up	GO:0015995(biological_process:chlorophyll biosynthetic process); GO:0009507(cellular_component:chloroplast); GO:0015979(biological_process:photosynthesis); GO:0005524(molecular_function:ATP binding); GO:0016851(molecular_function:magnesium chelatase activity)	K03405	chlI, bchI	map00860(Porphyrin and chlorophyll metabolism)	COG1239(H:Coenzyme transport and metabolism)	COG1239(magnesium chelatase)	sp|O22436|CHLI_TOBAC(Magnesium-chelatase subunit ChlI, chloroplastic OS=Nicotiana tabacum OX=4097 GN=CHLI PE=2 SV=1)	PF17863(AAA_lid_2:AAA lid domain); PF01078(Mg_chelatase:Magnesium chelatase, subunit ChlI); PF00493(MCM:MCM P-loop domain); PF07728(AAA_5:AAA domain (dynein-related subfamily)); PF13401(AAA_22:AAA domain); PF13191(AAA_16:AAA ATPase domain)
TRINITY_DN27248_c0_g1	Cluster 1		8.82562	3.1417	6.12452e-09	5.06128e-07	yes	up
TRINITY_DN8961_c0_g2	Cluster 1		3.72119	1.89576	6.41381e-09	5.28799e-07	yes	up					ENOG410YNU9(S:Function unknown); COG4886(S:Function unknown); ENOG410Z9QH(S:Function unknown)	ENOG410YNU9(Cotton fibre expressed protein); COG4886(leucine Rich Repeat); ENOG410Z9QH(-)		PF05553(DUF761:Cotton fibre expressed protein)
TRINITY_DN5383_c1_g1	Cluster 1	acetyl-coenzyme A synthetase, chloroplastic/glyoxysomal-like [Physcomitrella patens]	2.09557	1.06734	7.03264e-09	5.75122e-07	yes	up	GO:0003987(molecular_function:acetate-CoA ligase activity); GO:0016208(molecular_function:AMP binding); GO:0019427(biological_process:acetyl-CoA biosynthetic process from acetate); GO:0005524(molecular_function:ATP binding)	K01895	ACSS1_2, acs	map00630(Glyoxylate and dicarboxylate metabolism); map00640(Propanoate metabolism); map00620(Pyruvate metabolism); map00010(Glycolysis / Gluconeogenesis)	COG0365(S:Function unknown)	COG0365(Beta-1,3-galactosyltransferase)	sp|B9DGD6|ACS_ARATH(Acetyl-coenzyme A synthetase, chloroplastic/glyoxysomal OS=Arabidopsis thaliana OX=3702 GN=ACS PE=1 SV=1)	PF16177(ACAS_N:Acetyl-coenzyme A synthetase N-terminus); PF00501(AMP-binding:AMP-binding enzyme)
TRINITY_DN28838_c0_g1	Cluster 1	hemoglobin-2 isoform X1 [Selaginella moellendorffii]	3.04667	1.60724	7.53774e-09	6.14296e-07	yes	up	GO:0005344(molecular_function:oxygen transporter activity); GO:0046872(molecular_function:metal ion binding); GO:0019825(molecular_function:oxygen binding); GO:0020037(molecular_function:heme binding)	K21894	CYGB		COG1018(Q:Secondary metabolites biosynthesis, transport and catabolism)	COG1018(Cytochrome p450)	sp|Q947C5|HBL1_GOSHI(Non-symbiotic hemoglobin 1 OS=Gossypium hirsutum OX=3635 GN=HB1 PE=2 SV=1)	PF00042(Globin:Globin)
TRINITY_DN3566_c0_g1	Cluster 1	UDP-sulfoquinovose synthase, chloroplastic-like [Physcomitrella patens]	2.04874	1.03474	7.8331e-09	6.36165e-07	yes	up	GO:0003824(molecular_function:catalytic activity); GO:0050662(molecular_function:coenzyme binding)	K06118	SQD1, sqdB	map00520(Amino sugar and nucleotide sugar metabolism); map00561(Glycerolipid metabolism)	COG1087(S:Function unknown)	COG1087(-)	sp|Q84KI6|SQD1_SPIOL(UDP-sulfoquinovose synthase, chloroplastic OS=Spinacia oleracea OX=3562 GN=SQD1 PE=1 SV=1)	PF01370(Epimerase:NAD dependent epimerase/dehydratase family); PF16363(GDP_Man_Dehyd:GDP-mannose 4,6 dehydratase); PF02719(Polysacc_synt_2:Polysaccharide biosynthesis protein)
TRINITY_DN14921_c0_g1	Cluster 1	hypothetical protein SELMODRAFT_11342, partial [Selaginella moellendorffii]	2.5448	1.34755	8.2422e-09	6.6709e-07	yes	up	GO:0004674(molecular_function:protein serine/threonine kinase activity); GO:0005524(molecular_function:ATP binding)	K08867	WNK, PRKWNK		ENOG410XQWZ(T:Signal transduction mechanisms)	ENOG410XQWZ(WNK lysine deficient protein kinase)	sp|Q944Q0|WNK8_ARATH(Serine/threonine-protein kinase WNK8 OS=Arabidopsis thaliana OX=3702 GN=WNK8 PE=1 SV=1)	PF00069(Pkinase:Protein kinase domain); PF07714(PK_Tyr_Ser-Thr:Protein tyrosine and serine/threonine kinase); PF06207(DUF1002:Protein of unknown function (DUF1002))
TRINITY_DN79677_c0_g1	Cluster 1	asparagine--tRNA ligase, cytoplasmic 1-like [Physcomitrella patens]	4.73503	2.24337	8.87385e-09	7.15753e-07	yes	up	GO:0005737(cellular_component:cytoplasm); GO:0004815(molecular_function:aspartate-tRNA ligase activity); GO:0006421(biological_process:asparaginyl-tRNA aminoacylation); GO:0016021(cellular_component:integral component of membrane); GO:0004816(molecular_function:asparagine-tRNA ligase activity); GO:0003676(molecular_function:nucleic acid binding); GO:0006422(biological_process:aspartyl-tRNA aminoa…	K01893	NARS, asnS	map00970(Aminoacyl-tRNA biosynthesis)	COG0017(P:Inorganic ion transport and metabolism)	COG0017(p-type ATPase)	sp|Q9SW95|SYNC2_ARATH(Asparagine--tRNA ligase, cytoplasmic 2 OS=Arabidopsis thaliana OX=3702 GN=SYNC2 PE=1 SV=2)	PF00152(tRNA-synt_2:tRNA synthetases class II (D, K and N))
TRINITY_DN8991_c0_g1	Cluster 1		2.00423	1.00305	8.89265e-09	7.16451e-07	yes	up
TRINITY_DN1381_c9_g1	Cluster 1		7.4291	2.89319	9.84988e-09	7.8818e-07	yes	up
TRINITY_DN28062_c0_g1	Cluster 1	hypothetical protein AXG93_1748s1270 [Marchantia polymorpha subsp. ruderalis]	2.05765	1.041	1.05316e-08	8.34231e-07	yes	up	GO:0016021(cellular_component:integral component of membrane)				ENOG410XQ41(S:Function unknown)	ENOG410XQ41(Protein of unknown function (DUF3537))		PF12056(DUF3537:Protein of unknown function (DUF3537))
TRINITY_DN48278_c0_g2	Cluster 1		182.61	7.51262	1.05594e-08	8.35497e-07	yes	up
TRINITY_DN64086_c0_g3	Cluster 1		30.1338	4.91331	1.15772e-08	9.05878e-07	yes	up
TRINITY_DN6248_c0_g1	Cluster 1	leucine-rich repeat extensin-like protein 4 [Selaginella moellendorffii]	2.18002	1.12434	1.17751e-08	9.17664e-07	yes	up					ENOG410Y973(S:Function unknown)	ENOG410Y973(leucine-rich repeat extensin-like protein)	sp|Q9LHF1|LRX4_ARATH(Leucine-rich repeat extensin-like protein 4 OS=Arabidopsis thaliana OX=3702 GN=LRX4 PE=1 SV=1)	PF13855(LRR_8:Leucine rich repeat); PF12799(LRR_4:Leucine Rich repeats (2 copies)); PF08263(LRRNT_2:Leucine rich repeat N-terminal domain)
TRINITY_DN14965_c0_g3	Cluster 1	EaPIP1,1 [Equisetum arvense]	2.17141	1.11863	1.28462e-08	9.97443e-07	yes	up	GO:0016021(cellular_component:integral component of membrane); GO:0015267(molecular_function:channel activity)	K09872	PIP		COG0580(G:Carbohydrate transport and metabolism)	COG0580(Channel that permits osmotically driven movement of water in both directions. It is involved in the osmoregulation and in the maintenance of cell turgor during volume expansion in rapidly growing cells. It mediates rapid entry or exit of water in response to abrupt changes in osmolarity (By similarity))	sp|Q7XSQ9|PIP12_ORYSJ(Probable aquaporin PIP1-2 OS=Oryza sativa subsp. japonica OX=39947 GN=PIP1-2 PE=2 SV=3)	PF00230(MIP:Major intrinsic protein)
TRINITY_DN4291_c0_g2	Cluster 1		8.1702	3.03037	1.3157e-08	1.01933e-06	yes	up
TRINITY_DN6572_c0_g1	Cluster 1	rhodanese-like domain-containing protein 4, chloroplastic [Physcomitrella patens]	2.05087	1.03623	1.47828e-08	1.13228e-06	yes	up					ENOG410YFAD(S:Function unknown); ENOG410Y65V(S:Function unknown)	ENOG410YFAD(Retrotransposon protein); ENOG410Y65V(-)	sp|Q56XR7|STR4A_ARATH(Rhodanese-like domain-containing protein 4A, chloroplastic OS=Arabidopsis thaliana OX=3702 GN=STR4A PE=2 SV=1)
TRINITY_DN83507_c0_g1	Cluster 1	uncharacterized protein LOC112341862 [Selaginella moellendorffii]	6.80043	2.76563	1.51181e-08	1.15481e-06	yes	up	GO:0015074(biological_process:DNA integration); GO:0003676(molecular_function:nucleic acid binding)						sp|Q9ZT94|POLR2_ARATH(Retrovirus-related Pol polyprotein from transposon RE2 OS=Arabidopsis thaliana OX=3702 GN=RE2 PE=4 SV=1)
TRINITY_DN58220_c0_g1	Cluster 1		164.327	7.36043	1.55135e-08	1.17864e-06	yes	up
TRINITY_DN23475_c0_g2	Cluster 1		19.8397	4.31032	1.57286e-08	1.19114e-06	yes	up
TRINITY_DN20943_c0_g1	Cluster 1	hypothetical protein AXG93_1712s1320 [Marchantia polymorpha subsp. ruderalis]	2.19577	1.13473	1.71509e-08	1.28644e-06	yes	up	GO:0016021(cellular_component:integral component of membrane)	K10664	ATL6S		ENOG41121N2(O:Posttranslational modification, protein turnover, chaperones)	ENOG41121N2(zinc ion binding)	sp|Q8RXX9|ATL6_ARATH(E3 ubiquitin-protein ligase ATL6 OS=Arabidopsis thaliana OX=3702 GN=ATL6 PE=1 SV=2)	PF13639(zf-RING_2:Ring finger domain); PF17123(zf-RING_11:RING-like zinc finger); PF13923(zf-C3HC4_2:Zinc finger, C3HC4 type (RING finger)); PF12678(zf-rbx1:RING-H2 zinc finger domain); PF14634(zf-RING_5:zinc-RING finger domain); PF13445(zf-RING_UBOX:RING-type zinc-finger); PF00097(zf-C3HC4:Zinc finger, C3HC4 type (RING finger)); PF12861(zf-ANAPC11:Anaphase-promoting complex subunit 11 RING-H2 fi…
TRINITY_DN17135_c0_g1	Cluster 1	hypothetical protein MARPO_0002s0087 [Marchantia polymorpha]	2.45404	1.29516	1.77048e-08	1.32378e-06	yes	up	GO:0016747(molecular_function:transferase activity, transferring acyl groups other than amino-acyl groups)	K13065;K15400	E2.3.1.133, HCT;HHT1	map00941(Flavonoid biosynthesis); map00940(Phenylpropanoid biosynthesis); map00073(Cutin, suberine and wax biosynthesis); map00945(Stilbenoid, diarylheptanoid and gingerol biosynthesis)	ENOG4111F55(S:Function unknown)	ENOG4111F55(BAHD family acyltransferase, clade V (EC 2.3.1.-))	sp|Q9FFQ7|FACT_ARATH(Fatty alcohol:caffeoyl-CoA acyltransferase OS=Arabidopsis thaliana OX=3702 GN=FACT PE=2 SV=1)	PF02458(Transferase:Transferase family)
TRINITY_DN27506_c0_g1	Cluster 1	hypothetical protein AXG93_1429s1030 [Marchantia polymorpha subsp. ruderalis]	7.95065	2.99107	1.84655e-08	1.37494e-06	yes	up							sp|P14381|YTX2_XENLA(Transposon TX1 uncharacterized 149 kDa protein OS=Xenopus laevis OX=8355 PE=4 SV=1)	PF00078(RVT_1:Reverse transcriptase (RNA-dependent DNA polymerase))
TRINITY_DN433_c0_g5	Cluster 1	tubulin beta chain-like [Physcomitrella patens]	2.41886	1.27433	1.86352e-08	1.38455e-06	yes	up	GO:0005737(cellular_component:cytoplasm); GO:0007017(biological_process:microtubule-based process); GO:0000278(biological_process:mitotic cell cycle); GO:0003924(molecular_function:GTPase activity); GO:0005200(molecular_function:structural constituent of cytoskeleton); GO:0000226(biological_process:microtubule cytoskeleton organization); GO:0005874(cellular_component:microtubule); GO:0005525(mole…	K07375	TUBB	map04145(Phagosome)	COG5023(Z:Cytoskeleton)	COG5023(protein polymerization)	sp|Q43594|TBB1_ORYSJ(Tubulin beta-1 chain OS=Oryza sativa subsp. japonica OX=39947 GN=TUBB1 PE=2 SV=2)	PF00091(Tubulin:Tubulin/FtsZ family, GTPase domain); PF10644(Misat_Tub_SegII:Misato Segment II tubulin-like domain)
TRINITY_DN24750_c0_g2	Cluster 1		134.021	7.06632	1.87163e-08	1.38911e-06	yes	up
TRINITY_DN2815_c0_g1	Cluster 1		2.58706	1.37131	1.93576e-08	1.4296e-06	yes	up
TRINITY_DN1202_c0_g2	Cluster 1		163.096	7.34958	2.09809e-08	1.53622e-06	yes	up		K00766	trpD	map00400(Phenylalanine, tyrosine and tryptophan biosynthesis)	COG0547(E:Amino acid transport and metabolism)	COG0547(Anthranilate phosphoribosyltransferase)	sp|Q02166|TRPD_ARATH(Anthranilate phosphoribosyltransferase, chloroplastic OS=Arabidopsis thaliana OX=3702 GN=PAT1 PE=2 SV=1)
TRINITY_DN69617_c0_g1	Cluster 1	chlorophyll a-b binding protein 1 [Hymenophyllum caudiculatum]	2.63437	1.39746	2.14566e-08	1.56779e-06	yes	up	GO:0009535(cellular_component:chloroplast thylakoid membrane); GO:0016168(molecular_function:chlorophyll binding); GO:0009522(cellular_component:photosystem I); GO:0009523(cellular_component:photosystem II); GO:0016021(cellular_component:integral component of membrane); GO:0018298(biological_process:protein-chromophore linkage); GO:0046872(molecular_function:metal ion binding); GO:0009765(biologi…	K08912	LHCB1	map00196(Photosynthesis - antenna proteins)			sp|P15194|CB2B_PINSY(Chlorophyll a-b binding protein type 2 member 1B, chloroplastic OS=Pinus sylvestris OX=3349 PE=2 SV=1)	PF00504(Chloroa_b-bind:Chlorophyll A-B binding protein)
TRINITY_DN11347_c0_g1	Cluster 1		2.09034	1.06374	2.21361e-08	1.61079e-06	yes	up
TRINITY_DN26573_c0_g1	Cluster 1	hypothetical protein MARPO_0034s0071 [Marchantia polymorpha]	4.9658	2.31203	2.28069e-08	1.65618e-06	yes	up	GO:0005506(molecular_function:iron ion binding); GO:0008610(biological_process:lipid biosynthetic process); GO:0016491(molecular_function:oxidoreductase activity)	K20417	FAD4		ENOG410XRWR(S:Function unknown)	ENOG410XRWR(ubiquitin-conjugating enzyme)	sp|Q9SZ42|FAD4_ARATH(Fatty acid desaturase 4, chloroplastic OS=Arabidopsis thaliana OX=3702 GN=FAD4 PE=1 SV=1)	PF10520(TMEM189_B_dmain:B domain of TMEM189, localisation domain); PF04116(FA_hydroxylase:Fatty acid hydroxylase superfamily)
TRINITY_DN42126_c0_g2	Cluster 1		160.413	7.32564	2.37481e-08	1.71597e-06	yes	up
TRINITY_DN16350_c0_g1	Cluster 1		185.91	7.53846	2.48218e-08	1.77815e-06	yes	up
TRINITY_DN33223_c1_g4	Cluster 1	low-temperature-induced cysteine proteinase [Selaginella moellendorffii]	155.443	7.28024	2.68667e-08	1.90213e-06	yes	up	GO:0008234(molecular_function:cysteine-type peptidase activity)				COG4870(O:Posttranslational modification, protein turnover, chaperones)	COG4870(cathepsin)	sp|Q94B08|RDL1_ARATH(Germination-specific cysteine protease 1 OS=Arabidopsis thaliana OX=3702 GN=GCP1 PE=2 SV=2)	PF00112(Peptidase_C1:Papain family cysteine protease); PF08246(Inhibitor_I29:Cathepsin propeptide inhibitor domain (I29))
TRINITY_DN45328_c0_g1	Cluster 1	hypothetical protein SELMODRAFT_232221 [Selaginella moellendorffii]	2.49352	1.31818	3.0299e-08	2.11964e-06	yes	up	GO:0016787(molecular_function:hydrolase activity); GO:0006541(biological_process:glutamine metabolic process)				COG2071(S:Function unknown)	COG2071(Glutamine amidotransferase)	sp|Q8H0Z4|GT121_ARATH(Putative glutamine amidotransferase GAT1_2.1 OS=Arabidopsis thaliana OX=3702 GN=GAT1_2.1 PE=2 SV=1)	PF07722(Peptidase_C26:Peptidase C26); PF00117(GATase:Glutamine amidotransferase class-I)
TRINITY_DN28468_c0_g1	Cluster 1		156.571	7.29068	3.22105e-08	2.24448e-06	yes	up
TRINITY_DN25464_c0_g1	Cluster 1		44.7084	5.48248	3.26535e-08	2.26863e-06	yes	up					ENOG4111UA7(S:Function unknown)	ENOG4111UA7(-)
TRINITY_DN51659_c1_g2	Cluster 1		4.6395	2.21397	3.34482e-08	2.32156e-06	yes	up
TRINITY_DN9421_c0_g1	Cluster 1	allene oxide synthase [Selaginella moellendorffii]	2.02011	1.01443	3.39921e-08	2.34972e-06	yes	up	GO:0004497(molecular_function:monooxygenase activity); GO:0020037(molecular_function:heme binding); GO:0016021(cellular_component:integral component of membrane); GO:0016705(molecular_function:oxidoreductase activity, acting on paired donors, with incorporation or reduction of molecular oxygen); GO:0047987(molecular_function:hydroperoxide dehydratase activity); GO:0005506(molecular_function:iron …	K01723	AOS	map00592(alpha-Linolenic acid metabolism)	ENOG410ZAGU(Q:Secondary metabolites biosynthesis, transport and catabolism)	ENOG410ZAGU(Allene oxide synthase)	sp|K4BV52|AOS1_SOLLC(Allene oxide synthase 1, chloroplastic OS=Solanum lycopersicum OX=4081 GN=AOS1 PE=2 SV=1)	PF00067(p450:Cytochrome P450)
TRINITY_DN10413_c0_g1	Cluster 1		2.35517	1.23583	3.77553e-08	2.59249e-06	yes	up
TRINITY_DN12968_c0_g2	Cluster 1		27.0744	4.75886	3.91869e-08	2.68558e-06	yes	up
TRINITY_DN26052_c0_g1	Cluster 1		2.02966	1.02124	4.68119e-08	3.15309e-06	yes	up							sp|Q9SKX1|IBH1_ARATH(Transcription factor IBH1 OS=Arabidopsis thaliana OX=3702 GN=IBH1 PE=1 SV=1)
TRINITY_DN8712_c0_g2	Cluster 1		20.9007	4.38548	5.17189e-08	3.44745e-06	yes	up
TRINITY_DN12082_c0_g1	Cluster 1		16.5913	4.05236	5.40163e-08	3.57697e-06	yes	up
TRINITY_DN3200_c0_g1	Cluster 1	hypothetical protein SELMODRAFT_104575 [Selaginella moellendorffii]	2.14315	1.09974	5.49147e-08	3.6195e-06	yes	up	GO:0005506(molecular_function:iron ion binding); GO:0016705(molecular_function:oxidoreductase activity, acting on paired donors, with incorporation or reduction of molecular oxygen); GO:0016021(cellular_component:integral component of membrane); GO:0004497(molecular_function:monooxygenase activity); GO:0020037(molecular_function:heme binding)	K09590	CYP85A1, BR6OX1	map00905(Brassinosteroid biosynthesis)	COG2124(Q:Secondary metabolites biosynthesis, transport and catabolism)	COG2124(Cytochrome p450)	sp|Q69F95|C85A_PHAVU(Cytochrome P450 85A OS=Phaseolus vulgaris OX=3885 GN=BA13 PE=3 SV=2)	PF00067(p450:Cytochrome P450)
TRINITY_DN54542_c0_g1	Cluster 1	hypothetical protein MARPO_0039s0054 [Marchantia polymorpha]	2.10699	1.07518	5.76633e-08	3.79713e-06	yes	up	GO:0016620(molecular_function:oxidoreductase activity, acting on the aldehyde or oxo group of donors, NAD or NADP as acceptor)	K00130	betB, gbsA	map00260(Glycine, serine and threonine metabolism)	COG1012(S:Function unknown)	COG1012(transposon protein)	sp|O04895|BADH_AMAHP(Betaine aldehyde dehydrogenase, chloroplastic OS=Amaranthus hypochondriacus OX=28502 GN=BADH4 PE=3 SV=1)	PF00171(Aldedh:Aldehyde dehydrogenase family)
TRINITY_DN38830_c0_g1	Cluster 1		3.46986	1.79488	5.87876e-08	3.85679e-06	yes	up								PF10950(Organ_specific:Organ specific protein)
TRINITY_DN68952_c0_g3	Cluster 1		139.477	7.12388	6.95851e-08	4.47377e-06	yes	up					ENOG410Y65V(S:Function unknown)	ENOG410Y65V(Retrotransposon protein)
TRINITY_DN38858_c0_g1	Cluster 1		6.61801	2.7264	7.53674e-08	4.79751e-06	yes	up
TRINITY_DN79626_c1_g1	Cluster 1		20.3192	4.34477	7.64752e-08	4.85927e-06	yes	up
TRINITY_DN28763_c0_g3	Cluster 1		138.154	7.11013	7.91163e-08	5.00011e-06	yes	up
TRINITY_DN7773_c2_g1	Cluster 1		149.656	7.22551	7.93061e-08	5.00763e-06	yes	up
TRINITY_DN18939_c0_g1	Cluster 1	MADS-box gene 4 protein [Spinulum annotinum]	4.19514	2.06872	8.01053e-08	5.04907e-06	yes	up	GO:0003700(molecular_function:transcription factor activity, sequence-specific DNA binding); GO:0046983(molecular_function:protein dimerization activity); GO:0005634(cellular_component:nucleus); GO:0045944(biological_process:positive regulation of transcription from RNA polymerase II promoter); GO:0000977(molecular_function:RNA polymerase II regulatory region sequence-specific DNA binding)	K09264	K09264		COG5068(K:Transcription)	COG5068(Transcription factor)	sp|D7SMN6|FULL_VITVI(Agamous-like MADS-box protein FUL-L OS=Vitis vinifera OX=29760 GN=FULL PE=2 SV=1)	PF00319(SRF-TF:SRF-type transcription factor (DNA-binding and dimerisation domain)); PF01486(K-box:K-box region)
TRINITY_DN28460_c1_g1	Cluster 1		25.4742	4.67097	8.47238e-08	5.31174e-06	yes	up
TRINITY_DN63231_c0_g3	Cluster 1	gibberellin-regulated protein 7 [Selaginella moellendorffii]	3.29864	1.72187	9.8203e-08	6.06532e-06	yes	up					ENOG410YU8R(S:Function unknown)	ENOG410YU8R(Gibberellin-regulated)	sp|P86888|PMLN_PRUPE(Peamaclein OS=Prunus persica OX=3760 PE=1 SV=1)	PF02704(GASA:Gibberellin regulated protein)
TRINITY_DN70366_c0_g1	Cluster 1		62.3974	5.96341	1.03529e-07	6.37199e-06	yes	up
TRINITY_DN16258_c0_g4	Cluster 1		110.178	6.78369	1.06841e-07	6.56438e-06	yes	up
TRINITY_DN228_c0_g1	Cluster 1	26S proteasome regulatory subunit 8 homolog A-like [Physcomitrella patens]	2.06732	1.04776	1.07909e-07	6.62428e-06	yes	up	GO:0005737(cellular_component:cytoplasm); GO:0016787(molecular_function:hydrolase activity); GO:0030163(biological_process:protein catabolic process); GO:0005524(molecular_function:ATP binding)	K03066	PSMC5, RPT6	map03050(Proteasome)	COG1222(O:Posttranslational modification, protein turnover, chaperones)	COG1222(26S protease regulatory subunit)	sp|Q9C5U3|PRS8A_ARATH(26S proteasome regulatory subunit 8 homolog A OS=Arabidopsis thaliana OX=3702 GN=RPT6A PE=1 SV=1)
TRINITY_DN11351_c0_g1	Cluster 1	annexin A4 isoform X1 [Selaginella moellendorffii]	2.05958	1.04235	1.11887e-07	6.8506e-06	yes	up	GO:0005544(molecular_function:calcium-dependent phospholipid binding); GO:0005509(molecular_function:calcium ion binding)	K17098	ANNAT		ENOG410XPUN(O:Posttranslational modification, protein turnover, chaperones)	ENOG410XPUN(zinc ion binding)	sp|Q9ZVJ6|ANXD4_ARATH(Annexin D4 OS=Arabidopsis thaliana OX=3702 GN=ANN4 PE=1 SV=1)	PF00191(Annexin:Annexin)
TRINITY_DN11007_c0_g2	Cluster 1		140.314	7.13252	1.3597e-07	8.14861e-06	yes	up
TRINITY_DN58299_c0_g1	Cluster 1		145.326	7.18315	1.43846e-07	8.57696e-06	yes	up
TRINITY_DN29067_c0_g3	Cluster 1	hypothetical protein AXG93_815s1560 [Marchantia polymorpha subsp. ruderalis]	104.506	6.70744	1.44366e-07	8.60076e-06	yes	up					ENOG4111SG9(S:Function unknown); ENOG410XS82(S:Function unknown); ENOG410ZSHC(L:Replication, recombination and repair); ENOG410Y65V(S:Function unknown)	ENOG4111SG9(Reverse transcriptase (RNA-dependent DNA polymerase)); ENOG410XS82(Retrotransposon protein); ENOG410ZSHC(Reverse transcriptase (RNA-dependent DNA polymerase)); ENOG410Y65V(Retrotransposon protein)	sp|P14381|YTX2_XENLA(Transposon TX1 uncharacterized 149 kDa protein OS=Xenopus laevis OX=8355 PE=4 SV=1)	PF00078(RVT_1:Reverse transcriptase (RNA-dependent DNA polymerase))
TRINITY_DN8994_c0_g1	Cluster 1	hypothetical protein SELMODRAFT_84711 [Selaginella moellendorffii]	2.49529	1.31921	1.52157e-07	8.98911e-06	yes	up	GO:0019901(molecular_function:protein kinase binding); GO:0010375(biological_process:stomatal complex patterning); GO:2000123(biological_process:positive regulation of stomatal complex development); GO:0033612(molecular_function:receptor serine/threonine kinase binding)						sp|Q9SV72|EPFL9_ARATH(EPIDERMAL PATTERNING FACTOR-like protein 9 OS=Arabidopsis thaliana OX=3702 GN=EPFL9 PE=1 SV=1)	PF16851(Stomagen:Stomagen)
TRINITY_DN31931_c0_g2	Cluster 1		5.01626	2.32661	1.55628e-07	9.17117e-06	yes	up		K12599	SKI2, SKIV2L	map03018(RNA degradation)	COG4581(L:Replication, recombination and repair)	COG4581(helicase)	sp|F4JAA5|SKI2_ARATH(DExH-box ATP-dependent RNA helicase DExH11 OS=Arabidopsis thaliana OX=3702 GN=SKI2 PE=1 SV=1)
TRINITY_DN18545_c0_g1	Cluster 1	probable xyloglucan endotransglucosylase/hydrolase protein 5 [Selaginella moellendorffii]	21.9291	4.45478	1.59159e-07	9.36363e-06	yes	up	GO:0042546(biological_process:cell wall biogenesis); GO:0005618(cellular_component:cell wall); GO:0048046(cellular_component:apoplast); GO:0071555(biological_process:cell wall organization); GO:0016762(molecular_function:xyloglucan:xyloglucosyl transferase activity); GO:0004553(molecular_function:hydrolase activity, hydrolyzing O-glycosyl compounds); GO:0010411(biological_process:xyloglucan metab…	K14504	TCH4	map04075(Plant hormone signal transduction)	COG2273(U:Intracellular trafficking, secretion, and vesicular transport)	COG2273(Vacuolar Protein)	sp|Q38910|XTH23_ARATH(Probable xyloglucan endotransglucosylase/hydrolase protein 23 OS=Arabidopsis thaliana OX=3702 GN=XTH23 PE=2 SV=1)	PF00722(Glyco_hydro_16:Glycosyl hydrolases family 16)
TRINITY_DN19892_c0_g1	Cluster 1		2.53084	1.33962	1.70221e-07	9.93991e-06	yes	up
TRINITY_DN17037_c0_g1	Cluster 1		5.86738	2.55272	1.70539e-07	9.95025e-06	yes	up
TRINITY_DN4537_c1_g2	Cluster 1		3.45236	1.78758	1.79246e-07	1.04167e-05	yes	up					ENOG411079S(S:Function unknown); ENOG410YBST(S:Function unknown); ENOG41107JU(S:Function unknown)	ENOG411079S(-); ENOG410YBST(Mariner sub-class); ENOG41107JU(-)
TRINITY_DN14974_c1_g2	Cluster 1		125.616	6.97287	1.88263e-07	1.08855e-05	yes	up
TRINITY_DN50596_c0_g1	Cluster 1		4.43204	2.14797	1.96602e-07	1.13206e-05	yes	up
TRINITY_DN3908_c0_g1	Cluster 1	putative glucose-6-phosphate 1-epimerase isoform X1 [Physcomitrella patens]	2.09998	1.07037	2.13163e-07	1.21463e-05	yes	up	GO:0016853(molecular_function:isomerase activity); GO:0005975(biological_process:carbohydrate metabolic process); GO:0030246(molecular_function:carbohydrate binding); GO:0047938(molecular_function:glucose-6-phosphate 1-epimerase activity)	K01792	E5.1.3.15	map00010(Glycolysis / Gluconeogenesis)	COG0676(G:Carbohydrate transport and metabolism)	COG0676(Aldose 1epimerase)	sp|Q40784|AAPC_CENCI(Putative glucose-6-phosphate 1-epimerase OS=Cenchrus ciliaris OX=35872 PE=2 SV=1)	PF01263(Aldose_epim:Aldose 1-epimerase)
TRINITY_DN1472_c1_g2	Cluster 1	linamarin synthase 1 [Selaginella moellendorffii]	2.14085	1.09818	2.16342e-07	1.22917e-05	yes	up	GO:0016758(molecular_function:transferase activity, transferring hexosyl groups)	K17193	UGT79B1	map00942(Anthocyanin biosynthesis)	COG1819(S:Function unknown)	COG1819(Transferase)	sp|Q9LVW3|AXYLT_ARATH(Anthocyanidin 3-O-glucoside 2'''-O-xylosyltransferase OS=Arabidopsis thaliana OX=3702 GN=A3G2XYLT PE=1 SV=1)	PF00201(UDPGT:UDP-glucoronosyl and UDP-glucosyl transferase)
TRINITY_DN68294_c0_g1	Cluster 1		135.732	7.08462	2.24512e-07	1.27113e-05	yes	up
TRINITY_DN15335_c0_g1	Cluster 1	hypothetical protein MARPO_0010s0090 [Marchantia polymorpha]	2.35295	1.23447	2.26127e-07	1.27888e-05	yes	up		K10268	FBXL2_20		ENOG410XQ54(F:Nucleotide transport and metabolism); ENOG410YDZS(F:Nucleotide transport and metabolism)	ENOG410XQ54(nucleoside hydrolase); ENOG410YDZS(nucleoside hydrolase)	sp|Q8RWU5|FBL3_ARATH(F-box/LRR-repeat protein 3 OS=Arabidopsis thaliana OX=3702 GN=FBL3 PE=2 SV=1)	PF13516(LRR_6:Leucine Rich repeat); PF18511(F-box_5:F-box)
TRINITY_DN6198_c0_g1	Cluster 1	LOW QUALITY PROTEIN: probable disease resistance protein At4g27220 [Selaginella moellendorffii]	2.19741	1.13581	2.31021e-07	1.30273e-05	yes	up					COG4886(S:Function unknown)	COG4886(leucine Rich Repeat)	sp|P0C8S1|RP8L2_ARATH(Probable disease resistance RPP8-like protein 2 OS=Arabidopsis thaliana OX=3702 GN=RPP8L2 PE=3 SV=1)	PF00931(NB-ARC:NB-ARC domain)
TRINITY_DN6810_c0_g1	Cluster 1	potassium transporter 1-like [Physcomitrella patens]	2.12027	1.08425	2.40944e-07	1.35221e-05	yes	up	GO:0016021(cellular_component:integral component of membrane); GO:0015079(molecular_function:potassium ion transmembrane transporter activity)	K03549	kup				sp|O22397|POT1_ARATH(Potassium transporter 1 OS=Arabidopsis thaliana OX=3702 GN=POT1 PE=1 SV=2)	PF02705(K_trans:K+ potassium transporter)
TRINITY_DN34012_c0_g1	Cluster 1		120.893	6.91758	2.45315e-07	1.37456e-05	yes	up
TRINITY_DN6297_c0_g1	Cluster 1	hypothetical protein MARPO_0116s0014 [Marchantia polymorpha]	2.11939	1.08365	2.4698e-07	1.38279e-05	yes	up	GO:0009535(cellular_component:chloroplast thylakoid membrane); GO:0061635(biological_process:regulation of protein complex stability)				ENOG4111PN6(S:Function unknown)	ENOG4111PN6(-)	sp|Q9FL44|MPH1_ARATH(Protein MAINTENANCE OF PSII UNDER HIGH LIGHT 1 OS=Arabidopsis thaliana OX=3702 GN=MPH1 PE=1 SV=1)
TRINITY_DN23708_c0_g1	Cluster 1		61.7574	5.94854	2.50929e-07	1.40157e-05	yes	up
TRINITY_DN14969_c0_g2	Cluster 1		4.3344	2.11583	2.66127e-07	1.47365e-05	yes	up
TRINITY_DN10132_c0_g1	Cluster 1	hypothetical protein AXG93_2891s1160 [Marchantia polymorpha subsp. ruderalis]	19.0663	4.25295	2.75633e-07	1.52152e-05	yes	up	GO:0016021(cellular_component:integral component of membrane); GO:0009507(cellular_component:chloroplast)				ENOG410Y0RG(O:Posttranslational modification, protein turnover, chaperones)	ENOG410Y0RG(Acts as a processive, ATP-dependent zinc metallopeptidase for both cytoplasmic and membrane proteins. Plays a role in the quality control of integral membrane proteins (By similarity))	sp|P93735|ELIP1_ARATH(Early light-induced protein 1, chloroplastic OS=Arabidopsis thaliana OX=3702 GN=ELIP1 PE=1 SV=1)	PF00504(Chloroa_b-bind:Chlorophyll A-B binding protein)
TRINITY_DN86457_c0_g1	Cluster 1		95.9562	6.5843	2.8382e-07	1.56183e-05	yes	up
TRINITY_DN22422_c2_g2	Cluster 1		119.699	6.90326	2.87929e-07	1.58321e-05	yes	up
TRINITY_DN3395_c0_g1	Cluster 1		4.92749	2.30085	3.0179e-07	1.65299e-05	yes	up
TRINITY_DN41021_c0_g1	Cluster 1		128.265	7.00299	3.25841e-07	1.76964e-05	yes	up					ENOG410Y65V(S:Function unknown); ENOG4111MK6(S:Function unknown)	ENOG410Y65V(Retrotransposon protein); ENOG4111MK6(Retrotransposon protein)
TRINITY_DN63231_c0_g5	Cluster 1	gibberellin-regulated protein 7 [Selaginella moellendorffii]	8.78415	3.1349	3.31156e-07	1.79574e-05	yes	up					ENOG410YU8R(S:Function unknown)	ENOG410YU8R(Protein of unknown function (DUF1399))	sp|Q948Z4|SNAK1_SOLTU(Snakin-1 OS=Solanum tuberosum OX=4113 GN=SN1 PE=1 SV=1)	PF02704(GASA:Gibberellin regulated protein)
TRINITY_DN48216_c0_g1	Cluster 1		140.621	7.13567	3.3233e-07	1.80072e-05	yes	up					COG0577(V:Defense mechanisms)	COG0577(ABC transporter (permease))
TRINITY_DN74687_c1_g1	Cluster 1		17.0272	4.08977	3.36037e-07	1.81802e-05	yes	up
TRINITY_DN11813_c1_g1	Cluster 1	hypothetical protein PHYPA_013086 [Physcomitrella patens]	3.12088	1.64195	3.43719e-07	1.85391e-05	yes	up	GO:0016021(cellular_component:integral component of membrane); GO:0005975(biological_process:carbohydrate metabolic process); GO:0004553(molecular_function:hydrolase activity, hydrolyzing O-glycosyl compounds)	K01193	INV, sacA	map00500(Starch and sucrose metabolism); map00052(Galactose metabolism)	COG1621(G:Carbohydrate transport and metabolism)	COG1621(Hydrolase)	sp|Q43089|INV1_PEA(Beta-fructofuranosidase, cell wall isozyme OS=Pisum sativum OX=3888 GN=BFRUCT1 PE=2 SV=1)	PF08244(Glyco_hydro_32C:Glycosyl hydrolases family 32 C terminal)
TRINITY_DN25515_c0_g3	Cluster 1		122.581	6.93759	3.49575e-07	1.87975e-05	yes	up
TRINITY_DN27829_c0_g1	Cluster 1	hypothetical protein SELMODRAFT_20506, partial [Selaginella moellendorffii]	2.91823	1.54509	3.71648e-07	1.98335e-05	yes	up	GO:0016021(cellular_component:integral component of membrane); GO:0005524(molecular_function:ATP binding); GO:0004672(molecular_function:protein kinase activity)	K13420	FLS2	map04016(MAPK signaling pathway - plant); map04626(Plant-pathogen interaction)	COG4886(S:Function unknown)	COG4886(leucine Rich Repeat)	sp|Q9FL28|FLS2_ARATH(LRR receptor-like serine/threonine-protein kinase FLS2 OS=Arabidopsis thaliana OX=3702 GN=FLS2 PE=1 SV=1)	PF00069(Pkinase:Protein kinase domain); PF07714(PK_Tyr_Ser-Thr:Protein tyrosine and serine/threonine kinase)
TRINITY_DN3395_c2_g1	Cluster 1	hypothetical protein SELMODRAFT_74418 [Selaginella moellendorffii]	3.68007	1.87974	3.75471e-07	2.00224e-05	yes	up	GO:0008289(molecular_function:lipid binding)				ENOG410YQJJ(S:Function unknown)	ENOG410YQJJ(Protein of unknown function (DUF1336))	sp|F4JSE7|EDR2_ARATH(Protein ENHANCED DISEASE RESISTANCE 2 OS=Arabidopsis thaliana OX=3702 GN=EDR2 PE=2 SV=1)	PF07059(DUF1336:Protein of unknown function (DUF1336)); PF01852(START:START domain)
TRINITY_DN17113_c0_g1	Cluster 1		54.027	5.75561	3.81515e-07	2.02967e-05	yes	up
TRINITY_DN1381_c9_g2	Cluster 1		118.205	6.88514	3.81765e-07	2.02967e-05	yes	up
TRINITY_DN33698_c0_g1	Cluster 1		56.0337	5.80822	3.86384e-07	2.05115e-05	yes	up
TRINITY_DN49857_c0_g2	Cluster 1		117.036	6.87081	3.93449e-07	2.08708e-05	yes	up
TRINITY_DN58545_c0_g1	Cluster 1		5.4998	2.45938	4.05167e-07	2.14281e-05	yes	up
TRINITY_DN5853_c0_g1	Cluster 1	photosystem II 22 kDa protein, chloroplastic [Selaginella moellendorffii]	2.27287	1.18451	4.07373e-07	2.14965e-05	yes	up	GO:0009535(cellular_component:chloroplast thylakoid membrane); GO:0046872(molecular_function:metal ion binding); GO:0009055(molecular_function:electron carrier activity); GO:0020037(molecular_function:heme binding); GO:0016021(cellular_component:integral component of membrane); GO:0010196(biological_process:nonphotochemical quenching); GO:0019904(molecular_function:protein domain specific binding…	K03542	psbS	map00195(Photosynthesis)	ENOG4111VNI(I:Lipid transport and metabolism)	ENOG4111VNI(Photosystem II 22 kDa protein)	sp|A2XZ94|PSBS2_ORYSI(Photosystem II 22 kDa protein 2, chloroplastic OS=Oryza sativa subsp. indica OX=39946 GN=PSBS2 PE=3 SV=2)
TRINITY_DN18062_c0_g5	Cluster 1		9.61374	3.2651	4.18314e-07	2.20245e-05	yes	up
TRINITY_DN3746_c0_g1	Cluster 1	hypothetical protein AXG93_3818s1000 [Marchantia polymorpha subsp. ruderalis]	2.08876	1.06265	4.33541e-07	2.27077e-05	yes	up	GO:0042546(biological_process:cell wall biogenesis); GO:0016762(molecular_function:xyloglucan:xyloglucosyl transferase activity); GO:0005618(cellular_component:cell wall); GO:0048046(cellular_component:apoplast); GO:0071555(biological_process:cell wall organization); GO:0006073(biological_process:cellular glucan metabolic process); GO:0004553(molecular_function:hydrolase activity, hydrolyzing O-g…	K08235	E2.4.1.207		ENOG4111G24(G:Carbohydrate transport and metabolism)	ENOG4111G24(xyloglucan endotransglucosylase hydrolase protein)	sp|Q38908|XTH30_ARATH(Probable xyloglucan endotransglucosylase/hydrolase protein 30 OS=Arabidopsis thaliana OX=3702 GN=XTH30 PE=2 SV=2)	PF00722(Glyco_hydro_16:Glycosyl hydrolases family 16); PF06955(XET_C:Xyloglucan endo-transglycosylase (XET) C-terminus)
TRINITY_DN15740_c0_g3	Cluster 1	hypothetical protein AXG93_2145s1510 [Marchantia polymorpha subsp. ruderalis]	93.4878	6.54671	4.47672e-07	2.33785e-05	yes	up					ENOG4111MK6(S:Function unknown)	ENOG4111MK6(Retrotransposon protein)	sp|P11369|LORF2_MOUSE(LINE-1 retrotransposable element ORF2 protein OS=Mus musculus OX=10090 GN=Pol PE=1 SV=2)	PF00078(RVT_1:Reverse transcriptase (RNA-dependent DNA polymerase))
TRINITY_DN36313_c0_g1	Cluster 1		2.98546	1.57795	4.58699e-07	2.38838e-05	yes	up
TRINITY_DN30055_c1_g4	Cluster 1		115.915	6.85692	4.72776e-07	2.45084e-05	yes	up
TRINITY_DN40153_c0_g1	Cluster 1	uncharacterized protein LOC9649775 isoform X1 [Selaginella moellendorffii]	2.14727	1.1025	4.79695e-07	2.48307e-05	yes	up					ENOG4111623(S:Function unknown); ENOG410YU8R(S:Function unknown)	ENOG4111623(Gibberellin regulated protein); ENOG410YU8R(Gibberellin-regulated)	sp|Q948Z4|SNAK1_SOLTU(Snakin-1 OS=Solanum tuberosum OX=4113 GN=SN1 PE=1 SV=1)	PF02704(GASA:Gibberellin regulated protein)
TRINITY_DN26431_c1_g1	Cluster 1		53.7773	5.74892	4.89968e-07	2.53438e-05	yes	up
TRINITY_DN41165_c0_g1	Cluster 1	heat shock 70 kDa protein, mitochondrial-like [Physcomitrella patens]	2.50529	1.32498	5.16852e-07	2.65981e-05	yes	up	GO:0006457(biological_process:protein folding); GO:0051082(molecular_function:unfolded protein binding); GO:0005524(molecular_function:ATP binding)	K04043	dnaK, HSPA9	map03018(RNA degradation)	COG0443(O:Posttranslational modification, protein turnover, chaperones)	COG0443(Heat shock protein)	sp|Q01899|HSP7M_PHAVU(Heat shock 70 kDa protein, mitochondrial OS=Phaseolus vulgaris OX=3885 PE=2 SV=1)	PF00012(HSP70:Hsp70 protein); PF06723(MreB_Mbl:MreB/Mbl protein); PF14450(FtsA:Cell division protein FtsA)
TRINITY_DN34116_c0_g1	Cluster 1		110.928	6.79349	5.205e-07	2.67663e-05	yes	up
TRINITY_DN806_c1_g2	Cluster 1		9.10703	3.18698	5.37345e-07	2.74925e-05	yes	up
TRINITY_DN51935_c0_g1	Cluster 1		7.05451	2.81855	5.75227e-07	2.90937e-05	yes	up
TRINITY_DN18390_c0_g1	Cluster 1		2.77863	1.47438	5.811e-07	2.93277e-05	yes	up
TRINITY_DN9626_c0_g1	Cluster 1		2.32611	1.21792	6.43885e-07	3.20387e-05	yes	up
TRINITY_DN23771_c0_g2	Cluster 1	uncharacterized protein K02A2.6-like [Selaginella moellendorffii]	53.0262	5.72863	6.57325e-07	3.26385e-05	yes	up	GO:0015074(biological_process:DNA integration); GO:0003676(molecular_function:nucleic acid binding)				COG2801(L:Replication, recombination and repair)	COG2801(Retrotransposon protein)	sp|Q9UR07|TF211_SCHPO(Transposon Tf2-11 polyprotein OS=Schizosaccharomyces pombe (strain 972 / ATCC 24843) OX=284812 GN=Tf2-11 PE=3 SV=1)	PF17921(Integrase_H2C2:Integrase zinc binding domain); PF00665(rve:Integrase core domain)
TRINITY_DN69774_c0_g1	Cluster 1		11.9802	3.58258	6.57937e-07	3.2646e-05	yes	up					ENOG410YUPY(S:Function unknown)	ENOG410YUPY(Retroelement)
TRINITY_DN15154_c0_g2	Cluster 1		53.3785	5.73819	6.69004e-07	3.31485e-05	yes	up
TRINITY_DN25797_c1_g3	Cluster 1		96.2091	6.5881	7.31847e-07	3.57855e-05	yes	up
TRINITY_DN14460_c1_g1	Cluster 1	GDSL esterase/lipase 1-like isoform X1 [Physcomitrella patens]	2.07453	1.05279	7.81696e-07	3.79603e-05	yes	up	GO:0016788(molecular_function:hydrolase activity, acting on ester bonds)				COG3240(S:Function unknown)	COG3240(GDSL esterase lipase)	sp|H6U1I8|GLIP_TANCI(GDSL lipase OS=Tanacetum cinerariifolium OX=118510 GN=GLIP PE=1 SV=1)	PF00657(Lipase_GDSL:GDSL-like Lipase/Acylhydrolase)
TRINITY_DN25429_c0_g1	Cluster 1		110.096	6.78262	8.38419e-07	4.03543e-05	yes	up
TRINITY_DN80575_c0_g1	Cluster 1	protein FAR1-RELATED SEQUENCE 5-like [Physcomitrella patens]	3.98424	1.99431	8.43789e-07	4.05576e-05	yes	up	GO:0006355(biological_process:regulation of transcription, DNA-templated)							PF10551(MULE:MULE transposase domain)
TRINITY_DN1604_c1_g1	Cluster 1		3.43809	1.78161	9.22867e-07	4.39401e-05	yes	up					ENOG410YY3S(S:Function unknown)	ENOG410YY3S(- Plant thionin family protein precursor)	sp|Q9SBK8|THN_BRARP(Thionin OS=Brassica rapa subsp. pekinensis OX=51351 GN=THI2 PE=2 SV=1)	PF00321(Thionin:Plant thionin)
TRINITY_DN11192_c0_g5	Cluster 1		105.484	6.72088	9.25532e-07	4.40373e-05	yes	up								PF02902(Peptidase_C48:Ulp1 protease family, C-terminal catalytic domain)
TRINITY_DN6361_c10_g1	Cluster 1		5.2341	2.38794	9.34188e-07	4.44192e-05	yes	up
TRINITY_DN3108_c0_g1	Cluster 1		2.55869	1.3554	9.4707e-07	4.4941e-05	yes	up
TRINITY_DN5834_c0_g1	Cluster 1	hypothetical protein MARPO_0007s0127 [Marchantia polymorpha]	2.04126	1.02946	9.5808e-07	4.54329e-05	yes	up	GO:0016779(molecular_function:nucleotidyltransferase activity); GO:0009226(biological_process:nucleotide-sugar biosynthetic process); GO:0070569(molecular_function:uridylyltransferase activity)	K22920	UGP3	map00561(Glycerolipid metabolism)	ENOG410XTB8(S:Function unknown)	ENOG410XTB8(-)	sp|F4IY62|UGPA3_ARATH(UTP--glucose-1-phosphate uridylyltransferase 3, chloroplastic OS=Arabidopsis thaliana OX=3702 GN=UGP3 PE=1 SV=1)
TRINITY_DN22532_c0_g1	Cluster 1		51.3693	5.68283	9.72205e-07	4.6041e-05	yes	up
TRINITY_DN26276_c1_g2	Cluster 1		102.932	6.68554	1.04689e-06	4.92838e-05	yes	up
TRINITY_DN4498_c0_g1	Cluster 1	BTB/POZ domain-containing protein At1g63850-like isoform X1 [Physcomitrella patens]	2.01001	1.0072	1.06871e-06	5.00741e-05	yes	up					ENOG410YECX(S:Function unknown)	ENOG410YECX(BTB POZ domain-containing protein)	sp|Q9LVG9|Y5600_ARATH(BTB/POZ domain-containing protein At5g60050 OS=Arabidopsis thaliana OX=3702 GN=At5g60050 PE=2 SV=1)
TRINITY_DN16516_c0_g1	Cluster 1		10.6289	3.40992	1.07949e-06	5.05124e-05	yes	up
TRINITY_DN5347_c0_g1	Cluster 1	peamaclein [Selaginella moellendorffii]	5.27121	2.39813	1.08401e-06	5.06568e-05	yes	up					ENOG410YWQ9(O:Posttranslational modification, protein turnover, chaperones)	ENOG410YWQ9(gast1 protein homolog 1)	sp|P46689|GASA1_ARATH(Gibberellin-regulated protein 1 OS=Arabidopsis thaliana OX=3702 GN=GASA1 PE=2 SV=2)	PF02704(GASA:Gibberellin regulated protein)
TRINITY_DN44056_c0_g1	Cluster 1		3.14034	1.65092	1.08814e-06	5.07825e-05	yes	up
TRINITY_DN61736_c0_g1	Cluster 1		103.493	6.69338	1.12081e-06	5.21352e-05	yes	up
TRINITY_DN14758_c0_g2	Cluster 1		57.0136	5.83323	1.25906e-06	5.76203e-05	yes	up					ENOG4112C4M(S:Function unknown)	ENOG4112C4M(-)
TRINITY_DN6795_c0_g1	Cluster 1	purple acid phosphatase 18 [Selaginella moellendorffii]	2.062	1.04404	1.26619e-06	5.78689e-05	yes	up	GO:0046872(molecular_function:metal ion binding); GO:0003993(molecular_function:acid phosphatase activity)	K22390	ACP7		COG1409(S:Function unknown)	COG1409(Hydrolyzes cAMP to 5'-AMP. Plays an important regulatory role in modulating the intracellular concentration of cAMP, thereby influencing cAMP-dependent processes (By similarity))	sp|Q8S340|PPA22_ARATH(Purple acid phosphatase 22 OS=Arabidopsis thaliana OX=3702 GN=PAP22 PE=2 SV=1)	PF16656(Pur_ac_phosph_N:Purple acid Phosphatase, N-terminal domain); PF00149(Metallophos:Calcineurin-like phosphoesterase); PF14008(Metallophos_C:Iron/zinc purple acid phosphatase-like protein C)
TRINITY_DN81237_c0_g1	Cluster 1		100.341	6.64876	1.28482e-06	5.86067e-05	yes	up
TRINITY_DN16471_c2_g1	Cluster 1		4.75724	2.25012	1.48815e-06	6.68032e-05	yes	up
TRINITY_DN7613_c1_g1	Cluster 1		4.60493	2.20318	1.52598e-06	6.82845e-05	yes	up
TRINITY_DN13385_c0_g1	Cluster 1		105.089	6.71547	1.54338e-06	6.88452e-05	yes	up
TRINITY_DN8870_c0_g1	Cluster 1	putative methylesterase 14, chloroplastic [Selaginella moellendorffii]	2.09152	1.06455	1.663e-06	7.34392e-05	yes	up					ENOG4111IVV(S:Function unknown)	ENOG4111IVV(esterase)	sp|Q9FW03|MES11_ARATH(Putative methylesterase 11, chloroplastic OS=Arabidopsis thaliana OX=3702 GN=MES11 PE=2 SV=1)	PF12697(Abhydrolase_6:Alpha/beta hydrolase family); PF00561(Abhydrolase_1:alpha/beta hydrolase fold); PF12146(Hydrolase_4:Serine aminopeptidase, S33)
TRINITY_DN25298_c0_g3	Cluster 1		97.9021	6.61327	1.74522e-06	7.67344e-05	yes	up
TRINITY_DN14451_c1_g1	Cluster 1		47.9211	5.58259	1.74874e-06	7.68412e-05	yes	up
TRINITY_DN45475_c0_g3	Cluster 1		3.20767	1.68152	1.82197e-06	7.97613e-05	yes	up								PF12274(DUF3615:Protein of unknown function (DUF3615))
TRINITY_DN58521_c0_g1	Cluster 1	EH domain-containing protein 1-like [Physcomitrella patens]	5.10998	2.35332	1.88993e-06	8.23268e-05	yes	up	GO:0005509(molecular_function:calcium ion binding); GO:0005525(molecular_function:GTP binding)	K12483	EHD1	map04144(Endocytosis)	ENOG410XYGB(S:Function unknown)	ENOG410XYGB(EH-domain containing)	sp|Q94CF0|EHD1_ARATH(EH domain-containing protein 1 OS=Arabidopsis thaliana OX=3702 GN=EHD1 PE=1 SV=1)	PF18150(DUF5600:Domain of unknown function (DUF5600)); PF00350(Dynamin_N:Dynamin family); PF01926(MMR_HSR1:50S ribosome-binding GTPase); PF00009(GTP_EFTU:Elongation factor Tu GTP binding domain)
TRINITY_DN24593_c0_g5	Cluster 1		99.4281	6.63558	1.90082e-06	8.25991e-05	yes	up
TRINITY_DN63550_c0_g1	Cluster 1		96.0244	6.58533	1.95781e-06	8.48308e-05	yes	up					ENOG410Z56V(S:Function unknown); ENOG410XUGJ(S:Function unknown); ENOG411288N(S:Function unknown)	ENOG410Z56V(-); ENOG410XUGJ(-); ENOG411288N(-)
TRINITY_DN15999_c0_g1	Cluster 1		77.7101	6.28003	1.96147e-06	8.48308e-05	yes	up
TRINITY_DN58144_c0_g2	Cluster 1	uncharacterized protein LOC112341017 [Selaginella moellendorffii]	94.7174	6.56556	2.01127e-06	8.65469e-05	yes	up							sp|Q9UR07|TF211_SCHPO(Transposon Tf2-11 polyprotein OS=Schizosaccharomyces pombe (strain 972 / ATCC 24843) OX=284812 GN=Tf2-11 PE=3 SV=1)
TRINITY_DN15932_c0_g1	Cluster 1	protein ECERIFERUM 3-like [Physcomitrella patens]	4.66709	2.22252	2.05338e-06	8.81442e-05	yes	up	GO:0005506(molecular_function:iron ion binding); GO:0008610(biological_process:lipid biosynthetic process); GO:0016021(cellular_component:integral component of membrane); GO:0016491(molecular_function:oxidoreductase activity)				ENOG410Y1F6(S:Function unknown)	ENOG410Y1F6(WAX2 C-terminal domain)	sp|Q8H1Z0|CER3_ARATH(Very-long-chain aldehyde decarbonylase CER3 OS=Arabidopsis thaliana OX=3702 GN=CER3 PE=1 SV=1)	PF04116(FA_hydroxylase:Fatty acid hydroxylase superfamily)
TRINITY_DN75189_c0_g2	Cluster 1		102.957	6.6859	2.15062e-06	9.17059e-05	yes	up
TRINITY_DN16696_c0_g1	Cluster 1		7.1486	2.83766	2.17585e-06	9.26027e-05	yes	up
TRINITY_DN31628_c0_g1	Cluster 1		7.56524	2.91939	2.1769e-06	9.26027e-05	yes	up
TRINITY_DN44212_c0_g1	Cluster 1		6.3277	2.66168	2.23648e-06	9.47947e-05	yes	up					ENOG4111VRG(S:Function unknown); COG0048(J:Translation, ribosomal structure and biogenesis); ENOG410Y13W(S:Function unknown)	ENOG4111VRG(-); COG0048(Interacts with and stabilizes bases of the 16S rRNA that are involved in tRNA selection in the A site and with the mRNA backbone. Located at the interface of the 30S and 50S subunits, it traverses the body of the 30S subunit contacting proteins on the other side and probably holding the rRNA structure together. The combined cluster of proteins S8, S12 and S17 appears to ho…
TRINITY_DN34439_c0_g1	Cluster 1		103.562	6.69436	2.24815e-06	9.51182e-05	yes	up
TRINITY_DN18135_c0_g1	Cluster 1		3.41816	1.77322	2.34121e-06	9.84659e-05	yes	up
TRINITY_DN5559_c0_g1	Cluster 1		7.73175	2.95079	2.35428e-06	9.88393e-05	yes	up
TRINITY_DN9049_c0_g1	Cluster 1		109.228	6.77119	2.35787e-06	9.88725e-05	yes	up
TRINITY_DN25817_c0_g3	Cluster 1		5.01714	2.32687	2.49574e-06	0.00010373	yes	up
TRINITY_DN6750_c1_g1	Cluster 1		97.0147	6.60013	2.5282e-06	0.000105018	yes	up
TRINITY_DN70782_c2_g1	Cluster 1		99.6836	6.63928	2.57569e-06	0.000106677	yes	up
TRINITY_DN48343_c0_g3	Cluster 1		78.8468	6.30098	2.61765e-06	0.000108224	yes	up
TRINITY_DN23939_c0_g1	Cluster 1	hypothetical protein AXG93_3218s1300 [Marchantia polymorpha subsp. ruderalis]	2.56162	1.35705	2.75684e-06	0.000113382	yes	up	GO:0034765(biological_process:regulation of ion transmembrane transport); GO:0016021(cellular_component:integral component of membrane); GO:0005216(molecular_function:ion channel activity); GO:0005249(molecular_function:voltage-gated potassium channel activity)	K21867	AKT, KAT, GORK, SKOR		ENOG410XPSE(I:Lipid transport and metabolism)	ENOG410XPSE(Enoyl-CoA hydratase)	sp|Q38998|AKT1_ARATH(Potassium channel AKT1 OS=Arabidopsis thaliana OX=3702 GN=AKT1 PE=1 SV=2)	PF07885(Ion_trans_2:Ion channel); PF13857(Ank_5:Ankyrin repeats (many copies)); PF13637(Ank_4:Ankyrin repeats (many copies)); PF12796(Ank_2:Ankyrin repeats (3 copies)); PF00027(cNMP_binding:Cyclic nucleotide-binding domain); PF00023(Ank:Ankyrin repeat); PF13606(Ank_3:Ankyrin repeat); PF00520(Ion_trans:Ion transport protein)
TRINITY_DN18962_c0_g4	Cluster 1		42.4414	5.4074	2.88615e-06	0.000118013	yes	up
TRINITY_DN17996_c0_g2	Cluster 1	ATP-dependent zinc metalloprotease FTSH 2, chloroplastic [Selaginella moellendorffii]	2.71171	1.4392	3.11582e-06	0.000126526	yes	up	GO:0016021(cellular_component:integral component of membrane); GO:0016020(cellular_component:membrane); GO:0004222(molecular_function:metalloendopeptidase activity); GO:0005524(molecular_function:ATP binding)	K03798	ftsH, hflB		COG0465(J:Translation, ribosomal structure and biogenesis)	COG0465(Nucleolar protein)	sp|Q1PDW5|FTSH6_ARATH(ATP-dependent zinc metalloprotease FTSH 6, chloroplastic OS=Arabidopsis thaliana OX=3702 GN=FTSH6 PE=2 SV=1)	PF01434(Peptidase_M41:Peptidase family M41); PF00004(AAA:ATPase family associated with various cellular activities (AAA)); PF17862(AAA_lid_3:AAA+ lid domain); PF06480(FtsH_ext:FtsH Extracellular); PF06068(TIP49:TIP49 P-loop domain); PF07728(AAA_5:AAA domain (dynein-related subfamily)); PF05496(RuvB_N:Holliday junction DNA helicase RuvB P-loop domain); PF13207(AAA_17:AAA domain); PF13191(AAA_16:AA…
TRINITY_DN62750_c0_g1	Cluster 1		78.5849	6.29618	3.39968e-06	0.00013695	yes	up					ENOG410YZ0H(S:Function unknown); COG0417(L:Replication, recombination and repair); ENOG410XWAR(S:Function unknown)	ENOG410YZ0H(UV radiation resistance); COG0417(DNA polymerase); ENOG410XWAR(WD and tetratricopeptide repeats)
TRINITY_DN9661_c1_g1	Cluster 1		3.01606	1.59266	3.47576e-06	0.000139617	yes	up
TRINITY_DN27540_c1_g4	Cluster 1	ubiquitin-40S ribosomal protein S27a-like [Physcomitrella patens]	95.8968	6.58341	3.48694e-06	0.000139962	yes	up	GO:0005737(cellular_component:cytoplasm); GO:0031625(molecular_function:ubiquitin protein ligase binding); GO:0005840(cellular_component:ribosome); GO:0005634(cellular_component:nucleus); GO:0019941(biological_process:modification-dependent protein catabolic process); GO:0003735(molecular_function:structural constituent of ribosome); GO:0016567(biological_process:protein ubiquitination); GO:00313…	K08770;K02977;K02927	UBC;RP-S27Ae, RPS27A;RP-L40e, RPL40	map03010(Ribosome)			sp|P59271|R27AA_ARATH(Ubiquitin-40S ribosomal protein S27a-1 OS=Arabidopsis thaliana OX=3702 GN=RPS27AA PE=2 SV=2)	PF00240(ubiquitin:Ubiquitin family); PF11976(Rad60-SLD:Ubiquitin-2 like Rad60 SUMO-like); PF01428(zf-AN1:AN1-like Zinc finger); PF14560(Ubiquitin_2:Ubiquitin-like domain)
TRINITY_DN19756_c0_g1	Cluster 1	pentatricopeptide repeat protein 65 [Funaria hygrometrica]	3.62783	1.85911	3.54491e-06	0.000141991	yes	up	GO:0043231(cellular_component:intracellular membrane-bounded organelle); GO:0008270(molecular_function:zinc ion binding); GO:0009451(biological_process:RNA modification)				ENOG410Z7Z7(S:Function unknown)	ENOG410Z7Z7(Pentatricopeptide repeat-containing protein)	sp|Q9LJJ1|PP259_ARATH(Putative pentatricopeptide repeat-containing protein At3g28640 OS=Arabidopsis thaliana OX=3702 GN=PCMP-E79 PE=3 SV=1)	PF01535(PPR:PPR repeat); PF12854(PPR_1:PPR repeat)
TRINITY_DN14088_c2_g1	Cluster 1		88.6616	6.47024	3.54746e-06	0.000142013	yes	up
TRINITY_DN20978_c0_g1	Cluster 1	hypothetical protein MARPO_0047s0119 [Marchantia polymorpha]	12.1957	3.6083	3.59934e-06	0.000143764	yes	up	GO:0004674(molecular_function:protein serine/threonine kinase activity); GO:0000184(biological_process:nuclear-transcribed mRNA catabolic process, nonsense-mediated decay); GO:0044877(molecular_function:macromolecular complex binding); GO:0005524(molecular_function:ATP binding)	K07203	MTOR, FRAP, TOR	map04136(Autophagy - other)	COG5032(B:Chromatin structure and dynamics); COG5032(D:Cell cycle control, cell division, chromosome partitioning); COG5032(L:Replication, recombination and repair); COG5032(T:Signal transduction mechanisms); COG5032(U:Intracellular trafficking, secretion, and vesicular transport)	COG5032(phosphatidylinositol kinase activity); COG5032(phosphatidylinositol kinase activity); COG5032(phosphatidylinositol kinase activity); COG5032(phosphatidylinositol kinase activity); COG5032(phosphatidylinositol kinase activity)	sp|Q0DJS1|TOR_ORYSJ(Serine/threonine-protein kinase TOR OS=Oryza sativa subsp. japonica OX=39947 GN=TOR PE=1 SV=3)	PF00454(PI3_PI4_kinase:Phosphatidylinositol 3- and 4-kinase)
TRINITY_DN18962_c0_g1	Cluster 1		94.1183	6.5564	3.74436e-06	0.000148632	yes	up
TRINITY_DN19216_c0_g2	Cluster 1		73.6413	6.20244	4.15512e-06	0.000163137	yes	up
TRINITY_DN36151_c0_g2	Cluster 1		88.3232	6.46472	4.1748e-06	0.000163514	yes	up
TRINITY_DN6811_c0_g1	Cluster 1		3.8215	1.93414	4.24716e-06	0.000166164	yes	up								PF14244(Retrotran_gag_3:gag-polypeptide of LTR copia-type); PF03732(Retrotrans_gag:Retrotransposon gag protein); PF14223(Retrotran_gag_2:gag-polypeptide of LTR copia-type)
TRINITY_DN72452_c0_g2	Cluster 1		86.8096	6.43978	4.51848e-06	0.00017513	yes	up
TRINITY_DN10308_c3_g3	Cluster 1		86.0103	6.42644	4.54814e-06	0.000176183	yes	up
TRINITY_DN77052_c0_g1	Cluster 1		91.7938	6.52032	4.65486e-06	0.000179751	yes	up
TRINITY_DN29150_c0_g3	Cluster 1		66.4278	6.05371	4.71989e-06	0.000181641	yes	up
TRINITY_DN2094_c0_g1	Cluster 1	protein CDI [Selaginella moellendorffii]	2.10126	1.07126	4.97366e-06	0.000190267	yes	up					ENOG410ZX6Q(S:Function unknown)	ENOG410ZX6Q(-)	sp|Q9XIP8|CDI_ARATH(Protein CDI OS=Arabidopsis thaliana OX=3702 GN=CDI PE=2 SV=1)
TRINITY_DN57426_c1_g2	Cluster 1		10.2894	3.36308	5.00271e-06	0.000191275	yes	up					ENOG411180M(S:Function unknown); ENOG411175T(S:Function unknown)	ENOG411180M(Arabidopsis protein of unknown function); ENOG411175T(Arabidopsis protein of unknown function)		PF03087(DUF241:Arabidopsis protein of unknown function)
TRINITY_DN17764_c0_g1	Cluster 1	heptahelical transmembrane protein ADIPOR1 [Selaginella moellendorffii]	2.24806	1.16868	5.15808e-06	0.000196365	yes	up	GO:0016021(cellular_component:integral component of membrane)	K07297	ADIPOR		COG1272(E:Amino acid transport and metabolism)	COG1272(amino acid transport)	sp|Q84N34|HHP2_ARATH(Heptahelical transmembrane protein 2 OS=Arabidopsis thaliana OX=3702 GN=HHP2 PE=2 SV=1)	PF03006(HlyIII:Haemolysin-III related)
TRINITY_DN37003_c0_g1	Cluster 1		84.0438	6.39307	5.25673e-06	0.000199906	yes	up
TRINITY_DN3395_c1_g1	Cluster 1		2.1193	1.08359	5.27029e-06	0.000200313	yes	up
TRINITY_DN19033_c0_g1	Cluster 1	hypothetical protein AXG93_4577s1040 [Marchantia polymorpha subsp. ruderalis]	2.12804	1.08953	5.37471e-06	0.000204063	yes	up	GO:0005737(cellular_component:cytoplasm); GO:0070125(biological_process:mitochondrial translational elongation); GO:0003924(molecular_function:GTPase activity); GO:0005739(cellular_component:mitochondrion); GO:0003746(molecular_function:translation elongation factor activity); GO:0005525(molecular_function:GTP binding); GO:0006415(biological_process:translational termination); GO:0009507(cellular…	K02355	fusA, GFM, EFG		COG0480(S:Function unknown)	COG0480(KIP1-like protein)	sp|I1K0K6|EFGC2_SOYBN(Elongation factor G-2, chloroplastic OS=Glycine max OX=3847 GN=fusA2 PE=3 SV=1)	PF00009(GTP_EFTU:Elongation factor Tu GTP binding domain); PF03764(EFG_IV:Elongation factor G, domain IV); PF14492(EFG_III:Elongation Factor G, domain III); PF00679(EFG_C:Elongation factor G C-terminus); PF03144(GTP_EFTU_D2:Elongation factor Tu domain 2); PF16658(RF3_C:Class II release factor RF3, C-terminal domain); PF01926(MMR_HSR1:50S ribosome-binding GTPase)
TRINITY_DN43436_c0_g1	Cluster 1		96.4059	6.59105	5.47124e-06	0.000207365	yes	up
TRINITY_DN90754_c0_g1	Cluster 1	hypothetical protein PHYPA_024799 [Physcomitrella patens]	84.4249	6.3996	5.50743e-06	0.000208542	yes	up								PF14111(DUF4283:Domain of unknown function (DUF4283))
TRINITY_DN25600_c0_g1	Cluster 1	hypothetical protein MARPO_0071s0016 [Marchantia polymorpha]	2.17751	1.12268	5.51315e-06	0.000208646	yes	up	GO:0006457(biological_process:protein folding); GO:0051082(molecular_function:unfolded protein binding); GO:0005524(molecular_function:ATP binding)	K09487	HSP90B, TRA1	map04626(Plant-pathogen interaction); map04141(Protein processing in endoplasmic reticulum)	COG0326(S:Function unknown)	COG0326(-)	sp|Q9SIF2|HS905_ARATH(Heat shock protein 90-5, chloroplastic OS=Arabidopsis thaliana OX=3702 GN=HSP90-5 PE=1 SV=1)	PF00183(HSP90:Hsp90 protein)
TRINITY_DN4939_c1_g2	Cluster 1		2.48989	1.31608	5.52686e-06	0.000208941	yes	up
TRINITY_DN11192_c0_g2	Cluster 1		92.4657	6.53085	5.56027e-06	0.00020998	yes	up
TRINITY_DN53823_c0_g2	Cluster 1	hypothetical protein AXG93_321s1000 [Marchantia polymorpha subsp. ruderalis]	83.8525	6.38978	5.71124e-06	0.000214649	yes	up		K09286	EREBP		ENOG4111CZE(S:Function unknown)	ENOG4111CZE(-)
TRINITY_DN70366_c0_g2	Cluster 1		41.1286	5.36207	5.78352e-06	0.000217019	yes	up
TRINITY_DN9039_c0_g1	Cluster 1	hypothetical protein MARPO_0202s0019 [Marchantia polymorpha]	3.01543	1.59236	5.85718e-06	0.00021955	yes	up	GO:0005506(molecular_function:iron ion binding); GO:0016705(molecular_function:oxidoreductase activity, acting on paired donors, with incorporation or reduction of molecular oxygen); GO:0016021(cellular_component:integral component of membrane); GO:0004497(molecular_function:monooxygenase activity); GO:0020037(molecular_function:heme binding)	K00512	CYP17A		COG2124(Q:Secondary metabolites biosynthesis, transport and catabolism)	COG2124(Cytochrome p450)	sp|A0A4D6Q415|CYP1_CROXC(Flavonoid 3'-monooxygenase CYP75B137 OS=Crocosmia x crocosmiiflora OX=1053288 GN=CYP75B137 PE=1 SV=1)	PF00067(p450:Cytochrome P450)
TRINITY_DN20171_c0_g1	Cluster 1	hypothetical protein PHYPA_021642 [Physcomitrella patens]	2.14898	1.10365	5.95771e-06	0.000222256	yes	up	GO:0005737(cellular_component:cytoplasm); GO:0003824(molecular_function:catalytic activity); GO:0016832(molecular_function:aldehyde-lyase activity)				COG3836(G:Carbohydrate transport and metabolism)	COG3836(Aldolase)	sp|B1LLJ9|RHMA_ECOSM(2-keto-3-deoxy-L-rhamnonate aldolase OS=Escherichia coli (strain SMS-3-5 / SECEC) OX=439855 GN=rhmA PE=3 SV=1)	PF03328(HpcH_HpaI:HpcH/HpaI aldolase/citrate lyase family)
TRINITY_DN81111_c0_g2	Cluster 1		89.7534	6.48789	5.96483e-06	0.000222337	yes	up
TRINITY_DN34066_c0_g2	Cluster 1	hypothetical protein SELMODRAFT_429742 [Selaginella moellendorffii]	86.0496	6.4271	6.17443e-06	0.000228532	yes	up	GO:0016021(cellular_component:integral component of membrane); GO:0005975(biological_process:carbohydrate metabolic process); GO:0004553(molecular_function:hydrolase activity, hydrolyzing O-glycosyl compounds)	K01193	INV, sacA	map00500(Starch and sucrose metabolism); map00052(Galactose metabolism)	COG1621(G:Carbohydrate transport and metabolism)	COG1621(Hydrolase)	sp|Q67XZ3|INV3_ARATH(Beta-fructofuranosidase, insoluble isoenzyme CWINV3 OS=Arabidopsis thaliana OX=3702 GN=CWINV3 PE=1 SV=2)	PF00251(Glyco_hydro_32N:Glycosyl hydrolases family 32 N-terminal domain)
TRINITY_DN4570_c0_g1	Cluster 1		8.02249	3.00405	6.22925e-06	0.000230079	yes	up					ENOG410XPMQ(K:Transcription)	ENOG410XPMQ(homeobox)	sp|Q38874|STM_ARATH(Homeobox protein SHOOT MERISTEMLESS OS=Arabidopsis thaliana OX=3702 GN=STM PE=1 SV=2)	PF03790(KNOX1:KNOX1 domain)
TRINITY_DN10325_c3_g1	Cluster 1		5.59901	2.48517	6.27702e-06	0.000231722	yes	up
TRINITY_DN32685_c0_g2	Cluster 1	uncharacterized protein LOC112342112 [Selaginella moellendorffii]	9.15033	3.19382	6.32346e-06	0.000232949	yes	up	GO:0003964(molecular_function:RNA-directed DNA polymerase activity); GO:0008168(molecular_function:methyltransferase activity); GO:0003676(molecular_function:nucleic acid binding); GO:0015074(biological_process:DNA integration)				COG2801(L:Replication, recombination and repair)	COG2801(DNA polymerase processivity factor activity)	sp|P20825|POL2_DROME(Retrovirus-related Pol polyprotein from transposon 297 OS=Drosophila melanogaster OX=7227 GN=pol PE=4 SV=1)	PF00078(RVT_1:Reverse transcriptase (RNA-dependent DNA polymerase))
TRINITY_DN58823_c0_g8	Cluster 1		24.4665	4.61274	6.3317e-06	0.00023301	yes	up
TRINITY_DN17117_c0_g1	Cluster 1		2.71143	1.43905	6.78148e-06	0.000247627	yes	up		K08235	E2.4.1.207				sp|Q8LDS2|XTH27_ARATH(Probable xyloglucan endotransglucosylase/hydrolase protein 27 OS=Arabidopsis thaliana OX=3702 GN=XTH27 PE=2 SV=2)
TRINITY_DN22809_c0_g2	Cluster 1		15.0749	3.91408	6.8499e-06	0.000249481	yes	up
TRINITY_DN58368_c1_g2	Cluster 1		81.7208	6.35263	7.06753e-06	0.000255694	yes	up
TRINITY_DN12902_c1_g2	Cluster 1	probable xyloglucan endotransglucosylase/hydrolase protein 5 [Selaginella moellendorffii]	5.94968	2.57281	7.57206e-06	0.000271721	yes	up	GO:0042546(biological_process:cell wall biogenesis); GO:0005618(cellular_component:cell wall); GO:0048046(cellular_component:apoplast); GO:0071555(biological_process:cell wall organization); GO:0016762(molecular_function:xyloglucan:xyloglucosyl transferase activity); GO:0004553(molecular_function:hydrolase activity, hydrolyzing O-glycosyl compounds); GO:0010411(biological_process:xyloglucan metab…	K14504	TCH4	map04075(Plant hormone signal transduction)	COG2273(G:Carbohydrate transport and metabolism)	COG2273(hydrolase family 16)	sp|Q38910|XTH23_ARATH(Probable xyloglucan endotransglucosylase/hydrolase protein 23 OS=Arabidopsis thaliana OX=3702 GN=XTH23 PE=2 SV=1)	PF00722(Glyco_hydro_16:Glycosyl hydrolases family 16); PF06955(XET_C:Xyloglucan endo-transglycosylase (XET) C-terminus)
TRINITY_DN67385_c0_g1	Cluster 1	uncharacterized protein LOC9642938 [Selaginella moellendorffii]	80.1961	6.32546	7.6063e-06	0.000272766	yes	up	GO:0016758(molecular_function:transferase activity, transferring hexosyl groups)	K23452	UGT85A	map00908(Zeatin biosynthesis)	COG1819(S:Function unknown)	COG1819(UV radiation resistance)	sp|G3FIN9|UGTK5_MANES(Linamarin synthase 2 OS=Manihot esculenta OX=3983 GN=UGT85K5 PE=1 SV=1)	PF00201(UDPGT:UDP-glucoronosyl and UDP-glucosyl transferase)
TRINITY_DN20720_c0_g1	Cluster 1	hypothetical protein AXG93_3105s1100 [Marchantia polymorpha subsp. ruderalis]	2.15961	1.11077	7.60891e-06	0.000272766	yes	up	GO:0016020(cellular_component:membrane); GO:0009688(biological_process:abscisic acid biosynthetic process); GO:0009540(molecular_function:zeaxanthin epoxidase [overall] activity); GO:0071949(molecular_function:FAD binding); GO:0009507(cellular_component:chloroplast)				COG0654(C:Energy production and conversion); COG0654(H:Coenzyme transport and metabolism)	COG0654(oxidoreductase activity, acting on paired donors, with incorporation or reduction of molecular oxygen, NAD(P)H as one donor, and incorporation of one atom of oxygen); COG0654(oxidoreductase activity, acting on paired donors, with incorporation or reduction of molecular oxygen, NAD(P)H as one donor, and incorporation of one atom of oxygen)	sp|O81816|MO2_ARATH(Monooxygenase 2 OS=Arabidopsis thaliana OX=3702 GN=MO2 PE=2 SV=1)	PF01494(FAD_binding_3:FAD binding domain); PF01266(DAO:FAD dependent oxidoreductase); PF05834(Lycopene_cycl:Lycopene cyclase protein); PF13450(NAD_binding_8:NAD(P)-binding Rossmann-like domain); PF00890(FAD_binding_2:FAD binding domain); PF12831(FAD_oxidored:FAD dependent oxidoreductase); PF07992(Pyr_redox_2:Pyridine nucleotide-disulphide oxidoreductase); PF01946(Thi4:Thi4 family)
TRINITY_DN49801_c3_g1	Cluster 1		80.3607	6.32842	7.68942e-06	0.000275094	yes	up
TRINITY_DN8291_c0_g5	Cluster 1		62.2814	5.96073	7.82205e-06	0.000278851	yes	up
TRINITY_DN15879_c0_g1	Cluster 1	uncharacterized protein At1g03900-like [Physcomitrella patens]	63.5686	5.99024	7.92705e-06	0.000282025	yes	up	GO:0016020(cellular_component:membrane); GO:0006897(biological_process:endocytosis)	K20069	NECAP1_2		ENOG41113PS(S:Function unknown)	ENOG41113PS(expressed protein)	sp|Q681Q7|Y1390_ARATH(Uncharacterized protein At1g03900 OS=Arabidopsis thaliana OX=3702 GN=At1g03900 PE=2 SV=1)	PF07933(DUF1681:Protein of unknown function (DUF1681))
TRINITY_DN30488_c0_g1	Cluster 1		79.8676	6.31954	8.04217e-06	0.000285259	yes	up
TRINITY_DN19731_c0_g2	Cluster 1		6.17333	2.62605	9.46161e-06	0.000328193	yes	up
TRINITY_DN19968_c0_g1	Cluster 1		77.9873	6.28517	9.89519e-06	0.000341222	yes	up
TRINITY_DN20644_c0_g1	Cluster 1		85.8369	6.42353	1.03076e-05	0.000352691	yes	up
TRINITY_DN77098_c0_g1	Cluster 1	hypothetical protein AXG93_891s1050 [Marchantia polymorpha subsp. ruderalis]	6.83527	2.773	1.06253e-05	0.000361286	yes	up	GO:0004523(molecular_function:RNA-DNA hybrid ribonuclease activity); GO:0003676(molecular_function:nucleic acid binding)				ENOG410Y65V(S:Function unknown)	ENOG410Y65V(Retrotransposon protein)	sp|P0C2F6|RNHX1_ARATH(Putative ribonuclease H protein At1g65750 OS=Arabidopsis thaliana OX=3702 GN=At1g65750 PE=3 SV=1)	PF13456(RVT_3:Reverse transcriptase-like)
TRINITY_DN61811_c0_g1	Cluster 1		23.2545	4.53944	1.07577e-05	0.000364561	yes	up
TRINITY_DN35693_c0_g1	Cluster 1	rosmarinate synthase [Selaginella moellendorffii]	2.27644	1.18678	1.14629e-05	0.000385868	yes	up	GO:0016747(molecular_function:transferase activity, transferring acyl groups other than amino-acyl groups)				ENOG410YVYC(S:Function unknown)	ENOG410YVYC(Transferase family)	sp|Q6K638|HCT2_ORYSJ(Hydroxycinnamoyltransferase 2 OS=Oryza sativa subsp. japonica OX=39947 GN=HCT2 PE=2 SV=1)	PF02458(Transferase:Transferase family)
TRINITY_DN10821_c0_g1	Cluster 1	glutathione S-transferase U19-like [Selaginella moellendorffii]	3.49918	1.80702	1.15422e-05	0.000388167	yes	up		K00799	GST, gst	map00480(Glutathione metabolism)	ENOG410XSIX(O:Posttranslational modification, protein turnover, chaperones)	ENOG410XSIX(glutathione Stransferase)	sp|Q9FUS8|GSTUH_ARATH(Glutathione S-transferase U17 OS=Arabidopsis thaliana OX=3702 GN=GSTU17 PE=2 SV=1)	PF02798(GST_N:Glutathione S-transferase, N-terminal domain); PF13417(GST_N_3:Glutathione S-transferase, N-terminal domain); PF13409(GST_N_2:Glutathione S-transferase, N-terminal domain)
TRINITY_DN17723_c0_g2	Cluster 1	hypothetical protein AXG93_1487s1220 [Marchantia polymorpha subsp. ruderalis]	75.8819	6.24568	1.17795e-05	0.000395768	yes	up	GO:0015074(biological_process:DNA integration); GO:0003676(molecular_function:nucleic acid binding)				COG2801(L:Replication, recombination and repair)	COG2801(Retrotransposon protein)	sp|P10978|POLX_TOBAC(Retrovirus-related Pol polyprotein from transposon TNT 1-94 OS=Nicotiana tabacum OX=4097 PE=2 SV=1)	PF07727(RVT_2:Reverse transcriptase (RNA-dependent DNA polymerase))
TRINITY_DN31120_c0_g1	Cluster 1		78.4508	6.29372	1.19446e-05	0.000400365	yes	up
TRINITY_DN3283_c0_g1	Cluster 1	palmitoyl-acyl carrier protein thioesterase, chloroplastic-like isoform X2 [Physcomitrella patens]	2.01843	1.01323	1.20841e-05	0.000404849	yes	up	GO:0006633(biological_process:fatty acid biosynthetic process); GO:0016790(molecular_function:thiolester hydrolase activity); GO:0009507(cellular_component:chloroplast)	K10781	FATB	map00061(Fatty acid biosynthesis)	COG3884(I:Lipid transport and metabolism)	COG3884(acyl-ACP thioesterase)	sp|Q9SJE2|FATB_ARATH(Palmitoyl-acyl carrier protein thioesterase, chloroplastic OS=Arabidopsis thaliana OX=3702 GN=FATB PE=1 SV=1)	PF01643(Acyl-ACP_TE:Acyl-ACP thioesterase)
TRINITY_DN19913_c1_g1	Cluster 1		78.7429	6.29908	1.22071e-05	0.00040839	yes	up
TRINITY_DN39504_c1_g1	Cluster 1		76.4897	6.25719	1.22473e-05	0.000409348	yes	up		K08790	STK38, NDR		ENOG410Y65V(S:Function unknown)	ENOG410Y65V(Retrotransposon protein)
TRINITY_DN30638_c0_g1	Cluster 1		78.3106	6.29114	1.23087e-05	0.000410815	yes	up
TRINITY_DN28046_c0_g1	Cluster 1		13.9258	3.79969	1.27181e-05	0.000423193	yes	up
TRINITY_DN9719_c0_g1	Cluster 1		2.34413	1.22905	1.3023e-05	0.000432409	yes	up
TRINITY_DN22426_c0_g1	Cluster 1		24.5271	4.61631	1.30507e-05	0.000433124	yes	up
TRINITY_DN464_c0_g2	Cluster 1		2.50154	1.32282	1.37667e-05	0.000454327	yes	up
TRINITY_DN40419_c0_g1	Cluster 1	hypothetical protein AXG93_4473s1030 [Marchantia polymorpha subsp. ruderalis]	76.8276	6.26355	1.41163e-05	0.000464347	yes	up	GO:0015074(biological_process:DNA integration); GO:0003676(molecular_function:nucleic acid binding)				ENOG410XS4D(S:Function unknown); COG2801(L:Replication, recombination and repair)	ENOG410XS4D(Retrotransposon protein); COG2801(Retrotransposon protein)	sp|P10978|POLX_TOBAC(Retrovirus-related Pol polyprotein from transposon TNT 1-94 OS=Nicotiana tabacum OX=4097 PE=2 SV=1)	PF07727(RVT_2:Reverse transcriptase (RNA-dependent DNA polymerase))
TRINITY_DN11568_c0_g1	Cluster 1		58.3912	5.86768	1.46109e-05	0.000479924	yes	up
TRINITY_DN18361_c0_g1	Cluster 1		4.11345	2.04035	1.53102e-05	0.000499432	yes	up
TRINITY_DN3860_c2_g1	Cluster 1		3.98728	1.99541	1.60167e-05	0.000517936	yes	up
TRINITY_DN39603_c0_g1	Cluster 1		8.83597	3.14339	1.6039e-05	0.000518183	yes	up
TRINITY_DN1052_c0_g1	Cluster 1		4.57367	2.19335	1.62294e-05	0.000522661	yes	up
TRINITY_DN25160_c0_g1	Cluster 1		55.7356	5.80053	1.68117e-05	0.000538326	yes	up					ENOG410Y65V(S:Function unknown)	ENOG410Y65V(Retrotransposon protein)		PF14111(DUF4283:Domain of unknown function (DUF4283)); PF14392(zf-CCHC_4:Zinc knuckle)
TRINITY_DN66434_c1_g1	Cluster 1		71.8701	6.16732	1.78562e-05	0.000566787	yes	up
TRINITY_DN23376_c0_g1	Cluster 1		72.0605	6.17114	1.83178e-05	0.000580916	yes	up
TRINITY_DN44754_c0_g3	Cluster 1		71.9219	6.16836	1.88413e-05	0.000594316	yes	up
TRINITY_DN2892_c0_g2	Cluster 1	hypothetical protein MARPO_0031s0123 [Marchantia polymorpha]	2.33026	1.22049	1.89747e-05	0.00059799	yes	up	GO:0009508(cellular_component:plastid chromosome); GO:0042644(cellular_component:chloroplast nucleoid)				ENOG410XTIN(S:Function unknown)	ENOG410XTIN(-)
TRINITY_DN32080_c1_g2	Cluster 1		37.259	5.21952	1.95356e-05	0.000612935	yes	up
TRINITY_DN75832_c0_g1	Cluster 1		4.5704	2.19232	1.97954e-05	0.000619983	yes	up
TRINITY_DN120_c2_g3	Cluster 1		2.40661	1.267	1.98827e-05	0.000621117	yes	up
TRINITY_DN11125_c0_g1	Cluster 1	hypothetical protein MARPO_0207s0002 [Marchantia polymorpha]	3.02056	1.59481	2.15698e-05	0.000664556	yes	up	GO:0015074(biological_process:DNA integration); GO:0003676(molecular_function:nucleic acid binding)						sp|P03360|POL_AVIRE(Gag-Pol polyprotein (Fragment) OS=Avian reticuloendotheliosis virus OX=11636 GN=pol PE=1 SV=2)	PF00665(rve:Integrase core domain)
TRINITY_DN23252_c0_g1	Cluster 1	hypothetical protein MARPO_0011s0213 [Marchantia polymorpha]	2.01258	1.00905	2.17252e-05	0.000668279	yes	up	GO:0016021(cellular_component:integral component of membrane); GO:0005524(molecular_function:ATP binding); GO:0004672(molecular_function:protein kinase activity)				COG4886(S:Function unknown)	COG4886(Pfam:MuDR)	sp|Q8RZV7|MSP1_ORYSJ(Leucine-rich repeat receptor protein kinase MSP1 OS=Oryza sativa subsp. japonica OX=39947 GN=MSP1 PE=1 SV=1)	PF07714(PK_Tyr_Ser-Thr:Protein tyrosine and serine/threonine kinase); PF00069(Pkinase:Protein kinase domain)
TRINITY_DN10136_c0_g1	Cluster 1	proline dehydrogenase 1, mitochondrial-like isoform X1 [Physcomitrella patens]	2.05869	1.04172	2.42772e-05	0.000735572	yes	up	GO:0004657(molecular_function:proline dehydrogenase activity); GO:0010133(biological_process:proline catabolic process to glutamate); GO:0005739(cellular_component:mitochondrion); GO:0071949(molecular_function:FAD binding); GO:0006562(biological_process:proline catabolic process)	K00318	PRODH, fadM, putB	map00330(Arginine and proline metabolism)	COG0506(E:Amino acid transport and metabolism)	COG0506(Proline dehydrogenase)	sp|Q6NKX1|PROD2_ARATH(Proline dehydrogenase 2, mitochondrial OS=Arabidopsis thaliana OX=3702 GN=POX2 PE=2 SV=1)	PF01619(Pro_dh:Proline dehydrogenase)
TRINITY_DN54049_c0_g2	Cluster 1		4.53485	2.18105	2.54883e-05	0.000767331	yes	up					ENOG410YXD4(S:Function unknown)	ENOG410YXD4(Defensin-like protein)	sp|P82659|DFSD2_HELAN(Defensin SD2 OS=Helianthus annuus OX=4232 GN=SD2 PE=2 SV=1)	PF00304(Gamma-thionin:Gamma-thionin family)
TRINITY_DN16631_c2_g1	Cluster 1	hypothetical protein PHYPA_014847, partial [Physcomitrella patens]	3.06979	1.61814	2.57155e-05	0.000773182	yes	up		K12598	MTR4, SKIV2L2	map03018(RNA degradation)			sp|P14381|YTX2_XENLA(Transposon TX1 uncharacterized 149 kDa protein OS=Xenopus laevis OX=8355 PE=4 SV=1)	PF00078(RVT_1:Reverse transcriptase (RNA-dependent DNA polymerase))
TRINITY_DN41176_c0_g1	Cluster 1		72.453	6.17897	2.63061e-05	0.000787589	yes	up
TRINITY_DN23851_c0_g1	Cluster 1		34.1662	5.0945	2.68529e-05	0.000801921	yes	up
TRINITY_DN60628_c0_g1	Cluster 1		8.30395	3.0538	2.6947e-05	0.000804052	yes	up
TRINITY_DN48857_c0_g1	Cluster 1		8.66146	3.11461	2.70013e-05	0.000805333	yes	up
TRINITY_DN41779_c1_g3	Cluster 1		5.77959	2.53097	2.7338e-05	0.000814001	yes	up								PF14223(Retrotran_gag_2:gag-polypeptide of LTR copia-type); PF03732(Retrotrans_gag:Retrotransposon gag protein); PF13976(gag_pre-integrs:GAG-pre-integrase domain)
TRINITY_DN31937_c1_g1	Cluster 1	hypothetical protein PHYPA_023986, partial [Physcomitrella patens]	69.6503	6.12206	2.76176e-05	0.00082025	yes	up	GO:0003964(molecular_function:RNA-directed DNA polymerase activity); GO:0015074(biological_process:DNA integration); GO:0003676(molecular_function:nucleic acid binding)				COG2801(L:Replication, recombination and repair); ENOG410XS4D(S:Function unknown)	COG2801(Retrotransposon protein); ENOG410XS4D(Retrotransposon protein)	sp|Q94HW2|POLR1_ARATH(Retrovirus-related Pol polyprotein from transposon RE1 OS=Arabidopsis thaliana OX=3702 GN=RE1 PE=2 SV=1)	PF07727(RVT_2:Reverse transcriptase (RNA-dependent DNA polymerase))
TRINITY_DN37148_c0_g2	Cluster 1		80.1338	6.32434	2.77746e-05	0.000823874	yes	up
TRINITY_DN6966_c0_g1	Cluster 1	uncharacterized protein LOC112294033 [Physcomitrella patens]	2.1868	1.12882	2.89247e-05	0.000852977	yes	up					ENOG4111ZTB(S:Function unknown)	ENOG4111ZTB(Nuclear transport factor 2 (NTF2) domain)
TRINITY_DN59798_c0_g1	Cluster 1		70.6883	6.1434	2.91832e-05	0.000859227	yes	up
TRINITY_DN21223_c0_g2	Cluster 1	hypothetical protein SELMODRAFT_81509 [Selaginella moellendorffii]	67.5813	6.07855	2.97083e-05	0.000871545	yes	up	GO:0005829(cellular_component:cytosol); GO:0006529(biological_process:asparagine biosynthetic process); GO:0006541(biological_process:glutamine metabolic process); GO:0005524(molecular_function:ATP binding); GO:0004066(molecular_function:asparagine synthase (glutamine-hydrolyzing) activity)	K01953	asnB, ASNS	map00250(Alanine, aspartate and glutamate metabolism)	COG0367(E:Amino acid transport and metabolism)	COG0367(asparagine synthetase)	sp|P49091|ASNS_BRAOL(Asparagine synthetase [glutamine-hydrolyzing] OS=Brassica oleracea OX=3712 PE=2 SV=2)	PF00733(Asn_synthase:Asparagine synthase)
TRINITY_DN5057_c1_g1	Cluster 1	serine carboxypeptidase-like 42 [Selaginella moellendorffii]	2.18526	1.1278	3.01716e-05	0.000882016	yes	up	GO:0004185(molecular_function:serine-type carboxypeptidase activity)	K16297	SCPL-II		COG2939(E:Amino acid transport and metabolism)	COG2939(carboxy-peptidase)	sp|Q93Y09|SCP45_ARATH(Serine carboxypeptidase-like 45 OS=Arabidopsis thaliana OX=3702 GN=SCPL45 PE=2 SV=1)	PF00450(Peptidase_S10:Serine carboxypeptidase)
TRINITY_DN53873_c0_g1	Cluster 1		2.50349	1.32394	3.03655e-05	0.000886772	yes	up
TRINITY_DN92115_c0_g1	Cluster 1	AAA-ATPase At4g25835-like [Selaginella moellendorffii]	3.22111	1.68756	3.03719e-05	0.000886772	yes	up	GO:0005524(molecular_function:ATP binding)	K08900	BCS1		COG0465(O:Posttranslational modification, protein turnover, chaperones)	COG0465(Acts as a processive, ATP-dependent zinc metallopeptidase for both cytoplasmic and membrane proteins. Plays a role in the quality control of integral membrane proteins (By similarity))	sp|Q9FLD5|ASD_ARATH(AAA-ATPase ASD, mitochondrial OS=Arabidopsis thaliana OX=3702 GN=AATP1 PE=1 SV=1)	PF14363(AAA_assoc:Domain associated at C-terminal with AAA); PF00004(AAA:ATPase family associated with various cellular activities (AAA)); PF05496(RuvB_N:Holliday junction DNA helicase RuvB P-loop domain)
TRINITY_DN37756_c0_g1	Cluster 1		9.00734	3.1711	3.06368e-05	0.000892706	yes	up
TRINITY_DN6468_c0_g2	Cluster 1		3.23881	1.69547	3.2228e-05	0.000934401	yes	up
TRINITY_DN51488_c1_g2	Cluster 1		3.59586	1.84634	3.23936e-05	0.000938432	yes	up
TRINITY_DN25236_c0_g2	Cluster 1		50.5084	5.65845	3.2839e-05	0.000950345	yes	up
TRINITY_DN28914_c0_g1	Cluster 1		68.1041	6.08967	3.41373e-05	0.000984103	yes	up
TRINITY_DN16884_c0_g1	Cluster 1		5.4635	2.44982	3.4939e-05	0.00100272	yes	up
TRINITY_DN31465_c0_g1	Cluster 1	chlorophyll a-b binding protein 1 [Hymenophyllum caudiculatum]	65.8395	6.04088	3.50866e-05	0.00100613	yes	up	GO:0009535(cellular_component:chloroplast thylakoid membrane); GO:0016168(molecular_function:chlorophyll binding); GO:0009522(cellular_component:photosystem I); GO:0009523(cellular_component:photosystem II); GO:0016021(cellular_component:integral component of membrane); GO:0018298(biological_process:protein-chromophore linkage); GO:0009765(biological_process:photosynthesis, light harvesting)	K08912	LHCB1	map00196(Photosynthesis - antenna proteins)	ENOG410ZHBU(S:Function unknown)	ENOG410ZHBU(Zinc finger protein)	sp|P06671|CB22_MAIZE(Chlorophyll a-b binding protein, chloroplastic OS=Zea mays OX=4577 PE=2 SV=1)
TRINITY_DN10293_c0_g1	Cluster 1	hypothetical protein MARPO_0122s0029 [Marchantia polymorpha]	12.9418	3.69396	3.59402e-05	0.00102853	yes	up	GO:0005634(cellular_component:nucleus); GO:0008270(molecular_function:zinc ion binding)				COG5641(F:Nucleotide transport and metabolism)	COG5641(Dihydroorotase)	sp|Q8RWD0|COL16_ARATH(Zinc finger protein CONSTANS-LIKE 16 OS=Arabidopsis thaliana OX=3702 GN=COL16 PE=1 SV=2)
TRINITY_DN12805_c0_g1	Cluster 1	uncharacterized protein LOC9657574 [Selaginella moellendorffii]	2.00632	1.00455	3.59797e-05	0.00102924	yes	up					ENOG410YE87(S:Function unknown)	ENOG410YE87(Plant protein of unknown function (DUF868))		PF05910(DUF868:Plant protein of unknown function (DUF868))
TRINITY_DN24727_c0_g1	Cluster 1		67.6576	6.08018	3.60794e-05	0.00103126	yes	up
TRINITY_DN44659_c0_g3	Cluster 1		49.7353	5.6362	3.72908e-05	0.0010603	yes	up					ENOG410Z2VT(S:Function unknown); ENOG410XYMV(S:Function unknown)	ENOG410Z2VT(-); ENOG410XYMV(-)
TRINITY_DN35667_c0_g2	Cluster 1	pectinesterase-like [Selaginella moellendorffii]	2.43463	1.2837	3.73722e-05	0.00106219	yes	up	GO:0042545(biological_process:cell wall modification); GO:0005618(cellular_component:cell wall); GO:0016021(cellular_component:integral component of membrane); GO:0030599(molecular_function:pectinesterase activity); GO:0005576(cellular_component:extracellular region); GO:0045330(molecular_function:aspartyl esterase activity); GO:0004857(molecular_function:enzyme inhibitor activity); GO:0045490(bi…				COG4677(G:Carbohydrate transport and metabolism)	COG4677(pectinesterase)	sp|O48711|PME12_ARATH(Probable pectinesterase/pectinesterase inhibitor 12 OS=Arabidopsis thaliana OX=3702 GN=PME12 PE=2 SV=1)	PF01095(Pectinesterase:Pectinesterase); PF04043(PMEI:Plant invertase/pectin methylesterase inhibitor)
TRINITY_DN34634_c1_g1	Cluster 1	amino acid transporter AVT1B [Selaginella moellendorffii]	2.02253	1.01616	3.74477e-05	0.00106348	yes	up	GO:0020037(molecular_function:heme binding); GO:0003333(biological_process:amino acid transmembrane transport); GO:0016705(molecular_function:oxidoreductase activity, acting on paired donors, with incorporation or reduction of molecular oxygen); GO:0015171(molecular_function:amino acid transmembrane transporter activity); GO:0005886(cellular_component:plasma membrane); GO:0005506(molecular_functi…	K15015	SLC32A, VGAT		COG0814(S:Function unknown)	COG0814(beige BEACH domain containing protein)	sp|O80668|AVT1A_ARATH(Amino acid transporter AVT1A OS=Arabidopsis thaliana OX=3702 GN=AVT1A PE=2 SV=2)	PF01490(Aa_trans:Transmembrane amino acid transporter protein)
TRINITY_DN80987_c0_g1	Cluster 1		68.2736	6.09326	3.82189e-05	0.00107931	yes	up
TRINITY_DN71745_c0_g1	Cluster 1		67.8959	6.08525	3.94078e-05	0.00110934	yes	up
TRINITY_DN21646_c0_g1	Cluster 1		4.09972	2.03552	3.94886e-05	0.00111117	yes	up
TRINITY_DN59648_c0_g2	Cluster 1	hypothetical protein MARPO_0003s0071 [Marchantia polymorpha]	67.5164	6.07717	3.99075e-05	0.00112103	yes	up					ENOG410XQDR(S:Function unknown)	ENOG410XQDR(Domain-Containing protein)		PF13621(Cupin_8:Cupin-like domain)
TRINITY_DN26395_c0_g1	Cluster 1		66.2252	6.04931	4.11982e-05	0.00115285	yes	up
TRINITY_DN17101_c0_g1	Cluster 1		55.6701	5.79883	4.17848e-05	0.00116695	yes	up
TRINITY_DN15552_c0_g4	Cluster 1		21.1046	4.39949	4.19597e-05	0.00117002	yes	up
TRINITY_DN19357_c0_g1	Cluster 1		65.4738	6.03285	4.31917e-05	0.00120102	yes	up
TRINITY_DN45612_c0_g1	Cluster 1		4.71623	2.23764	4.35838e-05	0.00121049	yes	up
TRINITY_DN14832_c0_g3	Cluster 1		48.7567	5.60753	4.45074e-05	0.00123469	yes	up
TRINITY_DN63231_c0_g4	Cluster 1		4.58077	2.19559	4.49721e-05	0.00124604	yes	up
TRINITY_DN82614_c0_g1	Cluster 1		63.9858	5.99968	4.54992e-05	0.00125973	yes	up
TRINITY_DN2907_c0_g4	Cluster 1		3.89311	1.96092	4.56073e-05	0.00126174	yes	up
TRINITY_DN16441_c1_g5	Cluster 1		10.7071	3.4205	4.58188e-05	0.00126561	yes	up
TRINITY_DN662_c0_g1	Cluster 1		2.02676	1.01918	4.59252e-05	0.00126706	yes	up					ENOG41117UE(U:Intracellular trafficking, secretion, and vesicular transport); ENOG410YKTH(S:Function unknown)	ENOG41117UE(AAI); ENOG410YKTH(AAI)	sp|Q00451|PRF1_SOLLC(36.4 kDa proline-rich protein OS=Solanum lycopersicum OX=4081 GN=TPRP-F1 PE=2 SV=1)	PF14547(Hydrophob_seed:Hydrophobic seed protein); PF14368(LTP_2:Probable lipid transfer); PF00234(Tryp_alpha_amyl:Protease inhibitor/seed storage/LTP family)
TRINITY_DN17495_c1_g1	Cluster 1		63.8992	5.99773	4.73406e-05	0.00130103	yes	up
TRINITY_DN24375_c0_g1	Cluster 1		63.8992	5.99773	4.73406e-05	0.00130103	yes	up					ENOG4111T8J(S:Function unknown); ENOG410ZRGX(S:Function unknown)	ENOG4111T8J(transposon protein); ENOG410ZRGX(Pfam:hATC)	sp|P08770|TRA1_MAIZE(Putative AC transposase OS=Zea mays OX=4577 PE=2 SV=2)	PF05699(Dimer_Tnp_hAT:hAT family C-terminal dimerisation region)
TRINITY_DN79702_c0_g1	Cluster 1		65.6652	6.03706	4.80582e-05	0.00131665	yes	up
TRINITY_DN53251_c0_g3	Cluster 1		11.612	3.53754	4.91689e-05	0.00134292	yes	up								PF10551(MULE:MULE transposase domain)
TRINITY_DN8114_c0_g1	Cluster 1		2.16155	1.11207	5.04431e-05	0.00136925	yes	up					ENOG410YWBC(U:Intracellular trafficking, secretion, and vesicular transport)	ENOG410YWBC(Plant non-specific lipid-transfer proteins transfer phospholipids as well as galactolipids across membranes. May play a role in wax or cutin deposition in the cell walls of expanding epidermal cells and certain secretory tissues (By similarity))	sp|Q43748|NLTP_BETVU(Non-specific lipid-transfer protein OS=Beta vulgaris OX=161934 GN=IWF1' PE=3 SV=1)	PF00234(Tryp_alpha_amyl:Protease inhibitor/seed storage/LTP family); PF14368(LTP_2:Probable lipid transfer)
TRINITY_DN91734_c0_g1	Cluster 1		70.0676	6.13067	5.23041e-05	0.00141271	yes	up
TRINITY_DN22422_c1_g1	Cluster 1		66.4275	6.05371	5.37938e-05	0.00144576	yes	up
TRINITY_DN44160_c0_g1	Cluster 1		64.2356	6.0053	5.65084e-05	0.0015048	yes	up
TRINITY_DN45855_c0_g1	Cluster 1		21.4364	4.42199	6.01831e-05	0.00158848	yes	up
TRINITY_DN14900_c0_g3	Cluster 1		5.77318	2.52937	6.22361e-05	0.00163473	yes	up
TRINITY_DN13474_c0_g2	Cluster 1		3.88978	1.95969	6.64631e-05	0.00172587	yes	up
TRINITY_DN83271_c0_g1	Cluster 1		61.463	5.94165	6.76794e-05	0.00175294	yes	up
TRINITY_DN19750_c0_g1	Cluster 1	hypothetical protein AXG93_154s1390 [Marchantia polymorpha subsp. ruderalis]	2.36318	1.24073	6.87412e-05	0.00177329	yes	up	GO:0003700(molecular_function:transcription factor activity, sequence-specific DNA binding)				ENOG410YFVN(K:Transcription); ENOG410YEVN(K:Transcription)	ENOG410YFVN(bZIP transcription factor domain containing protein, expressed); ENOG410YEVN(Transcription factor)	sp|Q9M2K4|BZP61_ARATH(Basic leucine zipper 61 OS=Arabidopsis thaliana OX=3702 GN=BZIP61 PE=1 SV=1)	PF00170(bZIP_1:bZIP transcription factor); PF07716(bZIP_2:Basic region leucine zipper); PF03131(bZIP_Maf:bZIP Maf transcription factor)
TRINITY_DN68117_c0_g1	Cluster 1		4.03518	2.01263	6.99081e-05	0.00180011	yes	up
TRINITY_DN44212_c0_g2	Cluster 1		62.2537	5.96009	7.21557e-05	0.00184653	yes	up					ENOG4111VRG(S:Function unknown)	ENOG4111VRG(-)
TRINITY_DN18043_c0_g1	Cluster 1		45.7597	5.516	7.39482e-05	0.00188695	yes	up
TRINITY_DN58592_c0_g1	Cluster 1	transcription factor MYB53-like [Physcomitrella patens]	52.7073	5.71993	7.41651e-05	0.00189112	yes	up	GO:0005634(cellular_component:nucleus); GO:0003677(molecular_function:DNA binding)	K09422	MYBP		COG5147(U:Intracellular trafficking, secretion, and vesicular transport)	COG5147(Signal-recognition-particle assembly has a crucial role in targeting secretory proteins to the rough endoplasmic reticulum membrane (By similarity))	sp|Q9LTC4|MYB15_ARATH(Transcription factor MYB15 OS=Arabidopsis thaliana OX=3702 GN=MYB15 PE=1 SV=1)	PF00249(Myb_DNA-binding:Myb-like DNA-binding domain); PF13921(Myb_DNA-bind_6:Myb-like DNA-binding domain)
TRINITY_DN45113_c0_g1	Cluster 1	hypothetical protein SELMODRAFT_85852, partial [Selaginella moellendorffii]	3.00872	1.58915	7.52859e-05	0.00191218	yes	up	GO:0016787(molecular_function:hydrolase activity)	K06130	LYPLA2	map00564(Glycerophospholipid metabolism)	COG0400(S:Function unknown)	COG0400(phospholipase carboxylesterase)	sp|O95372|LYPA2_HUMAN(Acyl-protein thioesterase 2 OS=Homo sapiens OX=9606 GN=LYPLA2 PE=1 SV=1)	PF02230(Abhydrolase_2:Phospholipase/Carboxylesterase); PF03959(FSH1:Serine hydrolase (FSH1)); PF12146(Hydrolase_4:Serine aminopeptidase, S33); PF00326(Peptidase_S9:Prolyl oligopeptidase family)
TRINITY_DN18098_c0_g1	Cluster 1		2.77546	1.47273	7.88041e-05	0.0019893	yes	up
TRINITY_DN37035_c0_g3	Cluster 1		60.0284	5.90757	7.90735e-05	0.00199539	yes	up
TRINITY_DN2142_c0_g3	Cluster 1		45.36	5.50335	8.09629e-05	0.0020329	yes	up
TRINITY_DN22203_c0_g1	Cluster 1		61.9644	5.95337	8.21542e-05	0.00205916	yes	up
TRINITY_DN52911_c0_g1	Cluster 1		62.5337	5.96656	8.34868e-05	0.0020859	yes	up
TRINITY_DN22083_c0_g1	Cluster 1	hypothetical protein SELMODRAFT_42776, partial [Selaginella moellendorffii]	2.78563	1.47801	8.80897e-05	0.00217937	yes	up	GO:0003333(biological_process:amino acid transmembrane transport); GO:0016021(cellular_component:integral component of membrane); GO:0015171(molecular_function:amino acid transmembrane transporter activity); GO:0005886(cellular_component:plasma membrane)	K15015	SLC32A, VGAT		COG0814(E:Amino acid transport and metabolism)	COG0814(amino acid transport)	sp|O80668|AVT1A_ARATH(Amino acid transporter AVT1A OS=Arabidopsis thaliana OX=3702 GN=AVT1A PE=2 SV=2)	PF01490(Aa_trans:Transmembrane amino acid transporter protein)
TRINITY_DN22320_c0_g1	Cluster 1		66.2063	6.0489	8.90945e-05	0.0021988	yes	up					ENOG410Y5S3(S:Function unknown)	ENOG410Y5S3(transposon protein)	sp|Q9SZL8|FRS5_ARATH(Protein FAR1-RELATED SEQUENCE 5 OS=Arabidopsis thaliana OX=3702 GN=FRS5 PE=1 SV=1)
TRINITY_DN20127_c0_g1	Cluster 1		4.47748	2.16269	8.94275e-05	0.00220547	yes	up
TRINITY_DN38421_c1_g4	Cluster 1		28.8727	4.85163	9.06626e-05	0.00223126	yes	up
TRINITY_DN30201_c1_g1	Cluster 1		43.4582	5.44155	9.29088e-05	0.00227781	yes	up					ENOG4111P6Q(S:Function unknown); ENOG410XUN0(S:Function unknown)	ENOG4111P6Q(-); ENOG410XUN0(-)	sp|Q3BAI2|YCX91_PHAAO(Uncharacterized protein ORF91 OS=Phalaenopsis aphrodite subsp. formosana OX=308872 PE=4 SV=1)
TRINITY_DN47993_c0_g3	Cluster 1	hypothetical protein AXG93_1881s1230 [Marchantia polymorpha subsp. ruderalis]	29.0289	4.85942	9.75157e-05	0.00237756	yes	up	GO:0005737(cellular_component:cytoplasm); GO:0031625(molecular_function:ubiquitin protein ligase binding); GO:0005840(cellular_component:ribosome); GO:0005634(cellular_component:nucleus); GO:0019941(biological_process:modification-dependent protein catabolic process); GO:0003735(molecular_function:structural constituent of ribosome); GO:0016567(biological_process:protein ubiquitination); GO:00313…	K02977	RP-S27Ae, RPS27A	map03010(Ribosome)	COG5272(P:Inorganic ion transport and metabolism)	COG5272(Bifunctional enzyme with both catalase and broad- spectrum peroxidase activity (By similarity))	sp|P15357|RS27A_DROME(Ubiquitin-40S ribosomal protein S27a OS=Drosophila melanogaster OX=7227 GN=RpS27A PE=1 SV=2)	PF00240(ubiquitin:Ubiquitin family); PF01599(Ribosomal_S27:Ribosomal protein S27a); PF11976(Rad60-SLD:Ubiquitin-2 like Rad60 SUMO-like); PF14560(Ubiquitin_2:Ubiquitin-like domain); PF13881(Rad60-SLD_2:Ubiquitin-2 like Rad60 SUMO-like)
TRINITY_DN9391_c0_g1	Cluster 1	hypothetical protein AXG93_2079s1090 [Marchantia polymorpha subsp. ruderalis]	4.7815	2.25746	9.95103e-05	0.00242201	yes	up	GO:0015074(biological_process:DNA integration); GO:0016021(cellular_component:integral component of membrane); GO:0003676(molecular_function:nucleic acid binding)				ENOG410XS4D(S:Function unknown); COG2801(L:Replication, recombination and repair)	ENOG410XS4D(Retrotransposon protein); COG2801(Retrotransposon protein)	sp|Q94HW2|POLR1_ARATH(Retrovirus-related Pol polyprotein from transposon RE1 OS=Arabidopsis thaliana OX=3702 GN=RE1 PE=2 SV=1)	PF07727(RVT_2:Reverse transcriptase (RNA-dependent DNA polymerase))
TRINITY_DN4780_c0_g1	Cluster 1		2.10218	1.07188	0.000100647	0.00244715	yes	up					COG0719(O:Posttranslational modification, protein turnover, chaperones)	COG0719(Fe-S assembly protein)
TRINITY_DN89931_c0_g1	Cluster 1	60S ribosomal protein L9-like [Physcomitrella patens]	57.4264	5.84364	0.00010112	0.0024578	yes	up	GO:0003735(molecular_function:structural constituent of ribosome); GO:0005840(cellular_component:ribosome); GO:0006412(biological_process:translation); GO:0019843(molecular_function:rRNA binding)	K02940	RP-L9e, RPL9	map03010(Ribosome)	COG0097(K:Transcription)	COG0097(Transcription factor)	sp|P49210|RL9_ORYSJ(60S ribosomal protein L9 OS=Oryza sativa subsp. japonica OX=39947 GN=RPL9 PE=2 SV=3)	PF00347(Ribosomal_L6:Ribosomal protein L6)
TRINITY_DN30603_c0_g1	Cluster 1	uncharacterized protein LOC112288386 [Physcomitrella patens]	3.19312	1.67497	0.000102788	0.00249136	yes	up	GO:0003700(molecular_function:transcription factor activity, sequence-specific DNA binding); GO:0005634(cellular_component:nucleus); GO:0003677(molecular_function:DNA binding)				ENOG410YY7D(K:Transcription)	ENOG410YY7D(Transcription factor)	sp|Q9FH54|EF114_ARATH(Ethylene-responsive transcription factor ERF114 OS=Arabidopsis thaliana OX=3702 GN=ERF114 PE=1 SV=1)	PF00847(AP2:AP2 domain)
TRINITY_DN4291_c1_g1	Cluster 1		57.4616	5.84453	0.000103257	0.00250028	yes	up
TRINITY_DN51783_c0_g1	Cluster 1		5.94854	2.57254	0.000103438	0.00250381	yes	up
TRINITY_DN27335_c0_g2	Cluster 1		19.91	4.31542	0.0001039	0.00251241	yes	up
TRINITY_DN38155_c1_g2	Cluster 1		60.5157	5.91924	0.000105461	0.00254494	yes	up
TRINITY_DN26303_c1_g4	Cluster 1	hypothetical protein MARPO_YA0006 [Marchantia polymorpha]	57.8975	5.85543	0.000107137	0.00257921	yes	up	GO:0016301(molecular_function:kinase activity); GO:0005773(cellular_component:vacuole); GO:0005829(cellular_component:cytosol); GO:0009738(biological_process:abscisic acid-activated signaling pathway); GO:0004674(molecular_function:protein serine/threonine kinase activity); GO:0010119(biological_process:regulation of stomatal movement); GO:0005509(molecular_function:calcium ion binding); GO:00103…	K13412	CPK	map04626(Plant-pathogen interaction)	ENOG410XRMJ(S:Function unknown)	ENOG410XRMJ(Protein of unknown function DUF89)	sp|Q6NLQ6|CDPKW_ARATH(Calcium-dependent protein kinase 32 OS=Arabidopsis thaliana OX=3702 GN=CPK32 PE=1 SV=1)	PF00036(EF-hand_1:EF hand); PF13405(EF-hand_6:EF-hand domain); PF13202(EF-hand_5:EF hand); PF13499(EF-hand_7:EF-hand domain pair); PF13833(EF-hand_8:EF-hand domain pair)
TRINITY_DN9601_c0_g2	Cluster 1		5.78801	2.53307	0.00011208	0.0026863	yes	up
TRINITY_DN5063_c0_g1	Cluster 1	cytochrome P450 71A1-like [Selaginella moellendorffii]	3.91163	1.96777	0.000112892	0.0027012	yes	up	GO:0005506(molecular_function:iron ion binding); GO:0016705(molecular_function:oxidoreductase activity, acting on paired donors, with incorporation or reduction of molecular oxygen); GO:0016021(cellular_component:integral component of membrane); GO:0004497(molecular_function:monooxygenase activity); GO:0020037(molecular_function:heme binding)				COG2124(S:Function unknown)	COG2124(Retrotransposon protein)	sp|O81974|C71D8_SOYBN(Cytochrome P450 71D8 OS=Glycine max OX=3847 GN=CYP71D8 PE=2 SV=1)	PF00067(p450:Cytochrome P450)
TRINITY_DN6447_c3_g2	Cluster 1		9.31001	3.21878	0.000118901	0.00282109	yes	up
TRINITY_DN19765_c0_g1	Cluster 1		42.3346	5.40377	0.000122093	0.00288518	yes	up
TRINITY_DN32719_c0_g1	Cluster 1	hypothetical protein AXG93_1429s1010 [Marchantia polymorpha subsp. ruderalis]	7.5456	2.91564	0.000123556	0.00291101	yes	up					ENOG410Y65V(S:Function unknown); ENOG4111MK6(S:Function unknown)	ENOG410Y65V(Retrotransposon protein); ENOG4111MK6(Retrotransposon protein)	sp|P14381|YTX2_XENLA(Transposon TX1 uncharacterized 149 kDa protein OS=Xenopus laevis OX=8355 PE=4 SV=1)	PF00078(RVT_1:Reverse transcriptase (RNA-dependent DNA polymerase))
TRINITY_DN5368_c1_g2	Cluster 1		5.29499	2.40463	0.000123728	0.00291311	yes	up		K01179	E3.2.1.4	map00500(Starch and sucrose metabolism)			sp|P22503|GUN_PHAVU(Endoglucanase OS=Phaseolus vulgaris OX=3885 PE=2 SV=2)
TRINITY_DN31207_c1_g1	Cluster 1		55.851	5.80351	0.000126067	0.00296226	yes	up
TRINITY_DN31166_c0_g1	Cluster 1		8.93284	3.15912	0.0001281	0.00300006	yes	up
TRINITY_DN52854_c0_g2	Cluster 1		11.7847	3.55884	0.000129454	0.00303076	yes	up
TRINITY_DN65386_c0_g1	Cluster 1		41.2837	5.3675	0.000131874	0.00307824	yes	up
TRINITY_DN16350_c0_g2	Cluster 1		55.7742	5.80153	0.000135169	0.0031427	yes	up
TRINITY_DN17779_c0_g3	Cluster 1		56.0194	5.80785	0.00013721	0.00318072	yes	up
TRINITY_DN6331_c0_g3	Cluster 1		5.02447	2.32897	0.000138317	0.00320428	yes	up
TRINITY_DN46058_c0_g1	Cluster 1		6.02533	2.59104	0.000143167	0.00330472	yes	up
TRINITY_DN14615_c2_g2	Cluster 1		56.1093	5.81017	0.000144196	0.00332522	yes	up					ENOG410Y21X(S:Function unknown)	ENOG410Y21X(-)	sp|Q6CQE5|TAR1_KLULA(Protein TAR1 OS=Kluyveromyces lactis (strain ATCC 8585 / CBS 2359 / DSM 70799 / NBRC 1267 / NRRL Y-1140 / WM37) OX=284590 GN=TAR1-A PE=4 SV=2)
TRINITY_DN17858_c1_g2	Cluster 1		60.4394	5.91742	0.000146728	0.0033803	yes	up
TRINITY_DN67385_c0_g2	Cluster 1	hypothetical protein SELMODRAFT_95938 [Selaginella moellendorffii]	13.2184	3.72447	0.000147977	0.00340449	yes	up	GO:0016758(molecular_function:transferase activity, transferring hexosyl groups)	K23452	UGT85A	map00908(Zeatin biosynthesis)	COG1819(S:Function unknown)	COG1819(Transferase)	sp|G3FIN8|UGTK4_MANES(Linamarin synthase 1 OS=Manihot esculenta OX=3983 GN=UGT85K4 PE=1 SV=1)
TRINITY_DN10319_c0_g1	Cluster 1		13.6787	3.77386	0.00014939	0.00343268	yes	up
TRINITY_DN17267_c0_g1	Cluster 1	ERF, partial [Bryum argenteum]	3.1687	1.66389	0.000155455	0.003557	yes	up	GO:0003700(molecular_function:transcription factor activity, sequence-specific DNA binding); GO:0005634(cellular_component:nucleus); GO:0003677(molecular_function:DNA binding)	K14516	ERF1	map04016(MAPK signaling pathway - plant); map04075(Plant hormone signal transduction)	ENOG4111E8T(K:Transcription); ENOG410YJNR(K:Transcription)	ENOG4111E8T(Transcription factor); ENOG410YJNR(Transcription factor)	sp|A0A3Q7I5Y9|ERFC3_SOLLC(Ethylene-response factor C3 OS=Solanum lycopersicum OX=4081 GN=ERF.C.3 PE=2 SV=1)	PF00847(AP2:AP2 domain)
TRINITY_DN70600_c0_g2	Cluster 1		56.1912	5.81227	0.000155623	0.00355968	yes	up
TRINITY_DN42025_c0_g2	Cluster 1	hypothetical protein AXG93_2145s1510 [Marchantia polymorpha subsp. ruderalis]	53.6663	5.74595	0.000156548	0.00357415	yes	up					COG0577(V:Defense mechanisms)	COG0577(ABC transporter (permease))	sp|P0C2F6|RNHX1_ARATH(Putative ribonuclease H protein At1g65750 OS=Arabidopsis thaliana OX=3702 GN=At1g65750 PE=3 SV=1)
TRINITY_DN26273_c3_g1	Cluster 1		53.2247	5.73402	0.00016338	0.00370712	yes	up
TRINITY_DN9049_c0_g2	Cluster 1		17.7357	4.14859	0.000165631	0.00374856	yes	up
TRINITY_DN5441_c1_g1	Cluster 1		2.15666	1.1088	0.000168114	0.00379503	yes	up
TRINITY_DN12278_c0_g2	Cluster 1		70.2904	6.13526	0.00017904	0.00400331	yes	up					ENOG4112BYE(S:Function unknown)	ENOG4112BYE(protein Sb1514s002010 source)
TRINITY_DN36402_c0_g2	Cluster 1	hypothetical protein MARPO_4316s0001 [Marchantia polymorpha]	6.30056	2.65548	0.00018041	0.00402501	yes	up
TRINITY_DN14770_c2_g1	Cluster 1		25.9626	4.69837	0.000184853	0.00411117	yes	up
TRINITY_DN18656_c0_g1	Cluster 1		4.48332	2.16457	0.000187855	0.0041635	yes	up
TRINITY_DN43103_c0_g1	Cluster 1		5.781	2.53132	0.000188372	0.00417235	yes	up
TRINITY_DN3395_c0_g2	Cluster 1		16.8121	4.07143	0.000191723	0.00423462	yes	up
TRINITY_DN60768_c0_g5	Cluster 1	hypothetical protein SELMODRAFT_271983 [Selaginella moellendorffii]	56.5132	5.82051	0.000194376	0.00427767	yes	up	GO:0045735(molecular_function:nutrient reservoir activity)				ENOG410YATH(S:Function unknown)	ENOG410YATH(seed storage protein)	sp|B5KVH4|11S1_CARIL(11S globulin seed storage protein 1 OS=Carya illinoinensis OX=32201 PE=1 SV=1)	PF00190(Cupin_1:Cupin)
TRINITY_DN18611_c0_g2	Cluster 1		54.0941	5.7574	0.000201042	0.00439508	yes	up
TRINITY_DN16350_c0_g5	Cluster 1		51.3444	5.68214	0.000203354	0.00443879	yes	up
TRINITY_DN35365_c0_g2	Cluster 1		3.66825	1.87509	0.000204093	0.00444581	yes	up
TRINITY_DN25306_c0_g1	Cluster 1	hypothetical protein AXG93_1630s1400 [Marchantia polymorpha subsp. ruderalis]	2.24261	1.16518	0.000204568	0.00445358	yes	up	GO:0005506(molecular_function:iron ion binding); GO:0016705(molecular_function:oxidoreductase activity, acting on paired donors, with incorporation or reduction of molecular oxygen); GO:0016021(cellular_component:integral component of membrane); GO:0004497(molecular_function:monooxygenase activity); GO:0020037(molecular_function:heme binding)				COG2124(Q:Secondary metabolites biosynthesis, transport and catabolism)	COG2124(Cytochrome p450)	sp|I3PFJ5|C76AD_BETVU(Cytochrome P450 76AD1 OS=Beta vulgaris OX=161934 GN=CYP76AD1 PE=2 SV=1)	PF00067(p450:Cytochrome P450)
TRINITY_DN52092_c0_g1	Cluster 1		51.206	5.67824	0.000209142	0.00452877	yes	up					ENOG410XUN0(S:Function unknown); ENOG4112ASD(S:Function unknown)	ENOG410XUN0(-); ENOG4112ASD(-)
TRINITY_DN45317_c1_g2	Cluster 1		51.1801	5.67751	0.000212979	0.00459145	yes	up
TRINITY_DN46364_c0_g1	Cluster 1		26.3174	4.71794	0.000213311	0.0045953	yes	up
TRINITY_DN58146_c0_g1	Cluster 1		2.35586	1.23626	0.000219966	0.00471689	yes	up
TRINITY_DN4_c1_g1	Cluster 1		51.8413	5.69603	0.000221975	0.00475419	yes	up
TRINITY_DN15599_c0_g1	Cluster 1		9.40828	3.23393	0.000223604	0.00478183	yes	up					ENOG410Z2X5(S:Function unknown); ENOG410YRAU(S:Function unknown)	ENOG410Z2X5(CACTA, En Spm sub-class); ENOG410YRAU(CACTA, En Spm sub-class)
TRINITY_DN8388_c2_g1	Cluster 1		7.50608	2.90806	0.000224956	0.00480348	yes	up
TRINITY_DN69968_c0_g1	Cluster 1	hypothetical protein MARPO_0040s0097 [Marchantia polymorpha]	5.28364	2.40153	0.000225807	0.00481898	yes	up	GO:0016021(cellular_component:integral component of membrane)				ENOG411157M(S:Function unknown)	ENOG411157M(Pfam:DUF231)	sp|Q9ZV89|TBL42_ARATH(Protein trichome birefringence-like 42 OS=Arabidopsis thaliana OX=3702 GN=TBL42 PE=3 SV=1)	PF13839(PC-Esterase:GDSL/SGNH-like Acyl-Esterase family found in Pmr5 and Cas1p); PF14416(PMR5N:PMR5 N terminal Domain)
TRINITY_DN60883_c0_g3	Cluster 1		56.5483	5.82141	0.000230294	0.00490117	yes	up
TRINITY_DN39075_c0_g2	Cluster 1		3.59166	1.84465	0.000230876	0.00491209	yes	up
TRINITY_DN77801_c0_g3	Cluster 1		6.07923	2.60389	0.000231358	0.00491946	yes	up
TRINITY_DN9736_c5_g1	Cluster 1		54.2429	5.76136	0.000236702	0.00501038	yes	up
TRINITY_DN75004_c0_g1	Cluster 1		36.9824	5.20877	0.000242065	0.00510403	yes	up
TRINITY_DN68118_c1_g1	Cluster 1		26.484	4.72705	0.000244324	0.0051446	yes	up
TRINITY_DN65417_c1_g1	Cluster 1		51.1174	5.67574	0.00024507	0.00515706	yes	up
TRINITY_DN30226_c1_g2	Cluster 1		54.4962	5.76808	0.000252115	0.00527658	yes	up
TRINITY_DN6447_c3_g1	Cluster 1		37.0269	5.2105	0.000254929	0.00532285	yes	up
TRINITY_DN19372_c0_g2	Cluster 1		38.4323	5.26425	0.000255331	0.00532652	yes	up
TRINITY_DN37225_c0_g6	Cluster 1		49.3514	5.62502	0.000264427	0.00548873	yes	up
TRINITY_DN15107_c0_g5	Cluster 1		16.1798	4.01612	0.000268298	0.00554464	yes	up
TRINITY_DN35794_c1_g1	Cluster 1		16.5703	4.05053	0.00026934	0.00556129	yes	up
TRINITY_DN35046_c0_g3	Cluster 1		42.1262	5.39665	0.000270084	0.00557503	yes	up					ENOG4111VRG(S:Function unknown); COG0048(J:Translation, ribosomal structure and biogenesis)	ENOG4111VRG(-); COG0048(Interacts with and stabilizes bases of the 16S rRNA that are involved in tRNA selection in the A site and with the mRNA backbone. Located at the interface of the 30S and 50S subunits, it traverses the body of the 30S subunit contacting proteins on the other side and probably holding the rRNA structure together. The combined cluster of proteins S8, S12 and S17 appears to ho…
TRINITY_DN81451_c0_g1	Cluster 1		49.1873	5.62021	0.000272278	0.00561048	yes	up
TRINITY_DN29458_c0_g1	Cluster 1	hypothetical protein SELMODRAFT_444883 [Selaginella moellendorffii]	49.2388	5.62172	0.00028147	0.00576625	yes	up	GO:0005737(cellular_component:cytoplasm); GO:0004349(molecular_function:glutamate 5-kinase activity); GO:0006561(biological_process:proline biosynthetic process); GO:0004350(molecular_function:glutamate-5-semialdehyde dehydrogenase activity); GO:0055129(biological_process:L-proline biosynthetic process); GO:0005524(molecular_function:ATP binding)	K12657	ALDH18A1, P5CS	map00330(Arginine and proline metabolism)	COG0263(S:Function unknown)	COG0263(auxin-responsive protein)	sp|O65361|P5CS_MESCR(Delta-1-pyrroline-5-carboxylate synthase OS=Mesembryanthemum crystallinum OX=3544 GN=P5CS PE=2 SV=1)	PF00696(AA_kinase:Amino acid kinase family)
TRINITY_DN62862_c0_g1	Cluster 1	hypothetical protein MARPO_0007s0191 [Marchantia polymorpha]	49.1612	5.61945	0.000282688	0.00578792	yes	up	GO:0003735(molecular_function:structural constituent of ribosome); GO:0005680(cellular_component:anaphase-promoting complex); GO:0006412(biological_process:translation); GO:0005840(cellular_component:ribosome)	K02870	RP-L12e, RPL12	map03010(Ribosome)	COG0080(J:Translation, ribosomal structure and biogenesis)	COG0080(This protein binds directly to 23S ribosomal RNA (By similarity))	sp|P61865|RL12_CAEBR(60S ribosomal protein L12 OS=Caenorhabditis briggsae OX=6238 GN=rpl-12 PE=3 SV=1)	PF03946(Ribosomal_L11_N:Ribosomal protein L11, N-terminal domain); PF00298(Ribosomal_L11:Ribosomal protein L11, RNA binding domain)
TRINITY_DN11936_c0_g1	Cluster 1		12.3224	3.62321	0.000283861	0.00580346	yes	up
TRINITY_DN34040_c0_g3	Cluster 1		35.9326	5.16722	0.000291071	0.00592856	yes	up
TRINITY_DN49982_c0_g1	Cluster 1	protein DMR6-LIKE OXYGENASE 2 [Selaginella moellendorffii]	4.49521	2.16839	0.000297578	0.00604022	yes	up	GO:0046872(molecular_function:metal ion binding); GO:0051213(molecular_function:dioxygenase activity); GO:0016491(molecular_function:oxidoreductase activity)				COG3491(S:Function unknown)	COG3491(Retrotransposon protein)	sp|O04847|DV4H_CATRO(Deacetoxyvindoline 4-hydroxylase OS=Catharanthus roseus OX=4058 GN=D4H PE=1 SV=2)	PF03171(2OG-FeII_Oxy:2OG-Fe(II) oxygenase superfamily)
TRINITY_DN22509_c0_g1	Cluster 1	UDP-glycosyltransferase 72B1-like [Physcomitrella patens]	2.3841	1.25345	0.000310545	0.00625846	yes	up	GO:0016758(molecular_function:transferase activity, transferring hexosyl groups)				COG1819(S:Function unknown)	COG1819(protein FAR1-RELATED SEQUENCE)	sp|Q9ZVX4|U90A1_ARATH(UDP-glycosyltransferase 90A1 OS=Arabidopsis thaliana OX=3702 GN=UGT90A1 PE=2 SV=1)	PF00201(UDPGT:UDP-glucoronosyl and UDP-glucosyl transferase)
TRINITY_DN12931_c1_g1	Cluster 1		54.0474	5.75615	0.000313558	0.00631378	yes	up							sp|Q8TGM6|TAR1_YEAST(Protein TAR1 OS=Saccharomyces cerevisiae (strain ATCC 204508 / S288c) OX=559292 GN=TAR1 PE=2 SV=1)
TRINITY_DN75233_c0_g1	Cluster 1	auxin-responsive protein SAUR40 [Selaginella moellendorffii]	6.93168	2.7932	0.000314232	0.00632375	yes	up	GO:0009733(biological_process:response to auxin)	nnu;K14488	;SAUR	map04075(Plant hormone signal transduction)			sp|Q9FK62|SAU24_ARATH(Auxin-responsive protein SAUR24 OS=Arabidopsis thaliana OX=3702 GN=SAUR24 PE=2 SV=1)	PF02519(Auxin_inducible:Auxin responsive protein)
TRINITY_DN6134_c0_g2	Cluster 1		12.0155	3.58683	0.000322027	0.0064494	yes	up
TRINITY_DN15687_c0_g2	Cluster 1		2.64362	1.40251	0.000326582	0.00652397	yes	up					ENOG4111PQU(K:Transcription)	ENOG4111PQU(Telomere repeat-binding protein)
TRINITY_DN18036_c0_g3	Cluster 1		37.0515	5.21146	0.000330622	0.0065935	yes	up
TRINITY_DN8055_c0_g2	Cluster 1		9.16665	3.19639	0.000335742	0.00667113	yes	up
TRINITY_DN21621_c0_g2	Cluster 1		10.0648	3.33125	0.000337011	0.00669445	yes	up
TRINITY_DN52381_c0_g1	Cluster 1		12.0852	3.59517	0.000340022	0.00674099	yes	up
TRINITY_DN79230_c0_g1	Cluster 1		47.3585	5.56555	0.000350418	0.00691027	yes	up
TRINITY_DN75479_c0_g2	Cluster 1		22.7465	4.50757	0.000351476	0.00692726	yes	up
TRINITY_DN1406_c1_g2	Cluster 1		47.4974	5.56978	0.000354248	0.00697217	yes	up
TRINITY_DN32399_c0_g1	Cluster 1	putative lysozyme-like protein [Selaginella moellendorffii]	50.0239	5.64454	0.000355653	0.00699788	yes	up	GO:0003676(molecular_function:nucleic acid binding)				ENOG410Z8CN(S:Function unknown)	ENOG410Z8CN(zinc finger protein)	sp|Q39261|ZFP2_ARATH(Zinc finger protein 2 OS=Arabidopsis thaliana OX=3702 GN=ZFP2 PE=1 SV=1)	PF13912(zf-C2H2_6:C2H2-type zinc finger)
TRINITY_DN41012_c0_g1	Cluster 1	hypothetical protein AXG93_2079s1090 [Marchantia polymorpha subsp. ruderalis]	2.24851	1.16897	0.000357678	0.00703381	yes	up	GO:0015074(biological_process:DNA integration); GO:0003676(molecular_function:nucleic acid binding)						sp|P92519|M810_ARATH(Uncharacterized mitochondrial protein AtMg00810 OS=Arabidopsis thaliana OX=3702 GN=AtMg00810 PE=4 SV=1)	PF07727(RVT_2:Reverse transcriptase (RNA-dependent DNA polymerase))
TRINITY_DN27877_c0_g1	Cluster 1		35.7738	5.16083	0.000360207	0.00707602	yes	up
TRINITY_DN17604_c0_g2	Cluster 1		52.6042	5.71711	0.000374107	0.00728591	yes	up					ENOG41122GY(S:Function unknown); ENOG4111P6Q(S:Function unknown)	ENOG41122GY(-); ENOG4111P6Q(-)
TRINITY_DN66230_c0_g1	Cluster 1	pectinesterase-like [Selaginella moellendorffii]	3.34957	1.74398	0.000399286	0.0076831	yes	up	GO:0042545(biological_process:cell wall modification); GO:0005618(cellular_component:cell wall); GO:0016021(cellular_component:integral component of membrane); GO:0030599(molecular_function:pectinesterase activity); GO:0005576(cellular_component:extracellular region); GO:0045330(molecular_function:aspartyl esterase activity); GO:0004857(molecular_function:enzyme inhibitor activity); GO:0045490(bi…	K01051	E3.1.1.11	map00040(Pentose and glucuronate interconversions)	COG4677(S:Function unknown)	COG4677(Doublestrandbreak repair protein rad21)	sp|P83948|PME3_CITSI(Pectinesterase 3 OS=Citrus sinensis OX=2711 PE=1 SV=1)	PF01095(Pectinesterase:Pectinesterase); PF04043(PMEI:Plant invertase/pectin methylesterase inhibitor)
TRINITY_DN54792_c0_g1	Cluster 1		4.01424	2.00513	0.00040047	0.00769541	yes	up
TRINITY_DN86537_c0_g1	Cluster 1		47.7805	5.57835	0.000407625	0.00781377	yes	up
TRINITY_DN40683_c0_g1	Cluster 1		22.9899	4.52293	0.000413254	0.00790667	yes	up
TRINITY_DN30559_c0_g1	Cluster 1		3.26526	1.7072	0.000419387	0.0079937	yes	up
TRINITY_DN31542_c0_g3	Cluster 1		47.2722	5.56292	0.000420234	0.00800336	yes	up
TRINITY_DN44496_c0_g1	Cluster 1		3.70713	1.8903	0.000426487	0.00810497	yes	up
TRINITY_DN21767_c0_g1	Cluster 1		14.6677	3.87457	0.000438291	0.00829138	yes	up
TRINITY_DN29088_c1_g2	Cluster 1		22.0552	4.46304	0.000440981	0.00832445	yes	up
TRINITY_DN1548_c1_g1	Cluster 1		47.8624	5.58082	0.000444846	0.0083862	yes	up
TRINITY_DN35640_c0_g1	Cluster 1	peroxidase A2 [Selaginella moellendorffii]	22.4915	4.49131	0.000452852	0.00851441	yes	up	GO:0020037(molecular_function:heme binding); GO:0006979(biological_process:response to oxidative stress); GO:0005576(cellular_component:extracellular region); GO:0042744(biological_process:hydrogen peroxide catabolic process); GO:0046872(molecular_function:metal ion binding); GO:0004601(molecular_function:peroxidase activity)	K00430	E1.11.1.7	map00940(Phenylpropanoid biosynthesis)	ENOG41107DQ(S:Function unknown)	ENOG41107DQ(Peroxidase)	sp|O23237|PER49_ARATH(Peroxidase 49 OS=Arabidopsis thaliana OX=3702 GN=PER49 PE=2 SV=2)
TRINITY_DN22917_c0_g4	Cluster 1		3.4507	1.78689	0.000456645	0.00856595	yes	up
TRINITY_DN64370_c0_g1	Cluster 1		47.4393	5.56801	0.000456684	0.00856595	yes	up
TRINITY_DN88929_c0_g1	Cluster 1	60S ribosomal protein L35-like [Physcomitrella patens]	45.3398	5.50271	0.000464417	0.00868103	yes	up	GO:0003735(molecular_function:structural constituent of ribosome); GO:0006412(biological_process:translation); GO:0005840(cellular_component:ribosome)	K02918	RP-L35e, RPL35	map03010(Ribosome)	COG0255(J:Translation, ribosomal structure and biogenesis)	COG0255(50s ribosomal protein l29)	sp|Q9M3D2|RL353_ARATH(60S ribosomal protein L35-3 OS=Arabidopsis thaliana OX=3702 GN=RPL35C PE=2 SV=1)	PF00831(Ribosomal_L29:Ribosomal L29 protein)
TRINITY_DN38052_c0_g1	Cluster 1		2.0335	1.02397	0.000474226	0.00882815	yes	up					ENOG411162B(S:Function unknown); ENOG410ZMUJ(S:Function unknown)	ENOG411162B(F-box protein); ENOG410ZMUJ(F-box protein)	sp|Q3EBZ2|SKI23_ARATH(F-box protein SKIP23 OS=Arabidopsis thaliana OX=3702 GN=SKIP23 PE=1 SV=1)	PF03478(DUF295:Protein of unknown function (DUF295))
TRINITY_DN42435_c0_g1	Cluster 1		2.86289	1.51747	0.00047877	0.00889988	yes	up
TRINITY_DN87915_c0_g1	Cluster 1		47.2988	5.56373	0.000485348	0.00900322	yes	up
TRINITY_DN35870_c0_g1	Cluster 1		3.14	1.65077	0.0004928	0.00912809	yes	up
TRINITY_DN70319_c0_g1	Cluster 1	hypothetical protein MARPO_0114s0042 [Marchantia polymorpha]	45.0627	5.49386	0.000492855	0.00912809	yes	up	GO:0003735(molecular_function:structural constituent of ribosome); GO:0005840(cellular_component:ribosome); GO:0022627(cellular_component:cytosolic small ribosomal subunit)	K02975	RP-S25e, RPS25	map03010(Ribosome)	COG4901(J:Translation, ribosomal structure and biogenesis)	COG4901(Ribosomal protein S25)	sp|Q8ISN9|RS25_BRABE(40S ribosomal protein S25 OS=Branchiostoma belcheri OX=7741 GN=RPS25 PE=2 SV=1)	PF03297(Ribosomal_S25:S25 ribosomal protein)
TRINITY_DN27555_c0_g2	Cluster 1		48.1515	5.58951	0.000497435	0.00920086	yes	up
TRINITY_DN22815_c0_g3	Cluster 1		6.51226	2.70316	0.000502736	0.00928918	yes	up
TRINITY_DN20254_c0_g1	Cluster 1	uncharacterized protein LOC9642938 [Selaginella moellendorffii]	2.42609	1.27863	0.000511458	0.00942568	yes	up	GO:0016758(molecular_function:transferase activity, transferring hexosyl groups)				COG1819(S:Function unknown)	COG1819(Transferase)	sp|Q9C768|U76B1_ARATH(UDP-glycosyltransferase 76B1 OS=Arabidopsis thaliana OX=3702 GN=UGT76B1 PE=2 SV=1)	PF00201(UDPGT:UDP-glucoronosyl and UDP-glucosyl transferase); PF04101(Glyco_tran_28_C:Glycosyltransferase family 28 C-terminal domain)
TRINITY_DN60768_c0_g1	Cluster 1	hypothetical protein SELMODRAFT_270393 [Selaginella moellendorffii]	45.6728	5.51326	0.000515297	0.00947174	yes	up	GO:0045735(molecular_function:nutrient reservoir activity)				ENOG410YATH(S:Function unknown)	ENOG410YATH(seed storage protein)	sp|Q09151|GLUA3_ORYSJ(Glutelin type-A 3 OS=Oryza sativa subsp. japonica OX=39947 GN=GLUA3 PE=2 SV=2)	PF00190(Cupin_1:Cupin); PF07883(Cupin_2:Cupin domain)
TRINITY_DN86330_c0_g1	Cluster 1		8.5117	3.08945	0.000546441	0.00996225	yes	up
TRINITY_DN15171_c1_g1	Cluster 1	hypothetical protein MARPO_4038s0001, partial [Marchantia polymorpha]	40.2561	5.33114	0.000549699	0.0100026	yes	up					ENOG41129JI(S:Function unknown); ENOG41123PQ(S:Function unknown)	ENOG41129JI(-); ENOG41123PQ(-)
TRINITY_DN57835_c0_g1	Cluster 1		2.69932	1.4326	0.000567421	0.0102748	yes	up
TRINITY_DN6037_c1_g1	Cluster 1		4.52635	2.17835	0.000571158	0.0103372	yes	up
TRINITY_DN19753_c0_g4	Cluster 1		32.5939	5.02653	0.000585338	0.010564	yes	up
TRINITY_DN15846_c0_g1	Cluster 1	probable WRKY transcription factor 23 isoform X1 [Selaginella moellendorffii]	2.38303	1.2528	0.000601502	0.0108061	yes	up	GO:0003700(molecular_function:transcription factor activity, sequence-specific DNA binding); GO:0043565(molecular_function:sequence-specific DNA binding); GO:0005634(cellular_component:nucleus)				ENOG410ZKP8(K:Transcription); ENOG410YIC2(K:Transcription)	ENOG410ZKP8(Transcription factor); ENOG410YIC2(Transcription factor)	sp|Q93WV4|WRK71_ARATH(WRKY transcription factor 71 OS=Arabidopsis thaliana OX=3702 GN=WRKY71 PE=2 SV=1)	PF03106(WRKY:WRKY DNA -binding domain)
TRINITY_DN58263_c0_g4	Cluster 1		31.8122	4.99151	0.000618713	0.0110843	yes	up
TRINITY_DN23375_c0_g1	Cluster 1		9.93681	3.31278	0.000619171	0.0110897	yes	up
TRINITY_DN87727_c0_g1	Cluster 1	hypothetical protein AXG93_4473s1030 [Marchantia polymorpha subsp. ruderalis]	3.44825	1.78586	0.000624979	0.011171	yes	up	GO:0015074(biological_process:DNA integration); GO:0003676(molecular_function:nucleic acid binding)				COG2801(L:Replication, recombination and repair)	COG2801(Retrotransposon protein)	sp|Q94HW2|POLR1_ARATH(Retrovirus-related Pol polyprotein from transposon RE1 OS=Arabidopsis thaliana OX=3702 GN=RE1 PE=2 SV=1)	PF07727(RVT_2:Reverse transcriptase (RNA-dependent DNA polymerase))
TRINITY_DN84222_c0_g1	Cluster 1		43.3212	5.437	0.000628864	0.0112178	yes	up
TRINITY_DN41291_c0_g1	Cluster 1		2.72237	1.44486	0.000634157	0.0112951	yes	up
TRINITY_DN64013_c1_g1	Cluster 1	26S proteasome regulatory subunit 4 homolog B [Physcomitrella patens]	43.1567	5.43151	0.000636054	0.011326	yes	up	GO:0005737(cellular_component:cytoplasm); GO:0016787(molecular_function:hydrolase activity); GO:0036402(molecular_function:proteasome-activating ATPase activity); GO:0030163(biological_process:protein catabolic process); GO:0000502(cellular_component:proteasome complex); GO:0005524(molecular_function:ATP binding)	K03062	PSMC1, RPT2	map03050(Proteasome)	COG1222(O:Posttranslational modification, protein turnover, chaperones)	COG1222(peptidase (S8 and S53, subtilisin, kexin, sedolisin)	sp|Q9SZD4|PRS4A_ARATH(26S proteasome regulatory subunit 4 homolog A OS=Arabidopsis thaliana OX=3702 GN=RPT2A PE=1 SV=1)	PF00004(AAA:ATPase family associated with various cellular activities (AAA))
TRINITY_DN71154_c0_g1	Cluster 1		44.9729	5.49098	0.000636628	0.0113334	yes	up
TRINITY_DN21655_c0_g1	Cluster 1		3.2221	1.688	0.000655694	0.011623	yes	up
TRINITY_DN7364_c1_g1	Cluster 1		43.5135	5.44339	0.000663942	0.0117457	yes	up
TRINITY_DN35052_c0_g1	Cluster 1		45.5907	5.51067	0.000664395	0.0117507	yes	up
TRINITY_DN33213_c1_g1	Cluster 1		42.9921	5.426	0.00066916	0.0118173	yes	up
TRINITY_DN36402_c0_g5	Cluster 1		53.1084	5.73087	0.000671517	0.0118559	yes	up					ENOG410Y5Z0(S:Function unknown)	ENOG410Y5Z0(-)
TRINITY_DN69597_c0_g1	Cluster 1		46.1355	5.5278	0.0006756	0.0119161	yes	up
TRINITY_DN14818_c0_g3	Cluster 1		6.17021	2.62532	0.000681821	0.0120018	yes	up
TRINITY_DN26446_c0_g1	Cluster 1	hypothetical protein AXG93_815s1540 [Marchantia polymorpha subsp. ruderalis]	2.20123	1.13831	0.000682361	0.0120084	yes	up							sp|P0C2F6|RNHX1_ARATH(Putative ribonuclease H protein At1g65750 OS=Arabidopsis thaliana OX=3702 GN=At1g65750 PE=3 SV=1)
TRINITY_DN41437_c0_g1	Cluster 1	hypothetical protein MARPO_0037s0124 [Marchantia polymorpha]	40.3453	5.33433	0.000694081	0.0121661	yes	up	GO:0071555(biological_process:cell wall organization); GO:0005576(cellular_component:extracellular region); GO:0005975(biological_process:carbohydrate metabolic process); GO:0004650(molecular_function:polygalacturonase activity)	K01184	E3.2.1.15	map00040(Pentose and glucuronate interconversions)	COG5434(S:Function unknown)	COG5434(Protein of unknown function (DUF3730))	sp|P48979|PGLR_PRUPE(Polygalacturonase OS=Prunus persica OX=3760 PE=2 SV=1)	PF00295(Glyco_hydro_28:Glycosyl hydrolases family 28); PF13229(Beta_helix:Right handed beta helix region)
TRINITY_DN17616_c0_g1	Cluster 1		5.57178	2.47814	0.000716093	0.0124788	yes	up
TRINITY_DN24083_c0_g1	Cluster 1	probable inactive shikimate kinase like 2, chloroplastic [Selaginella moellendorffii]	2.79814	1.48447	0.000718868	0.0125078	yes	up	GO:0000287(molecular_function:magnesium ion binding); GO:0019632(biological_process:shikimate metabolic process); GO:0004765(molecular_function:shikimate kinase activity); GO:0009073(biological_process:aromatic amino acid family biosynthetic process)				ENOG410XSXA(S:Function unknown)	ENOG410XSXA(Shikimate kinase)	sp|O82290|SKL2_ARATH(Probable inactive shikimate kinase like 2, chloroplastic OS=Arabidopsis thaliana OX=3702 GN=SKL2 PE=2 SV=2)	PF04969(CS:CS domain)
TRINITY_DN23249_c0_g2	Cluster 1		4.21533	2.07565	0.000719174	0.0125098	yes	up
TRINITY_DN24593_c0_g1	Cluster 1		43.5417	5.44433	0.000723342	0.0125606	yes	up
TRINITY_DN65140_c1_g1	Cluster 1		5.2226	2.38477	0.000738227	0.0127783	yes	up
TRINITY_DN29618_c0_g1	Cluster 1		3.40321	1.7669	0.000738708	0.0127835	yes	up
TRINITY_DN45159_c0_g1	Cluster 1		8.38382	3.06761	0.000747307	0.0129039	yes	up
TRINITY_DN31279_c0_g3	Cluster 1		14.0306	3.8105	0.000747309	0.0129039	yes	up
TRINITY_DN74127_c0_g1	Cluster 1		30.6923	4.9398	0.000768058	0.0132009	yes	up
TRINITY_DN62557_c0_g1	Cluster 1		6.89969	2.78653	0.000777688	0.0133235	yes	up		K02349	POLQ		COG0749(L:Replication, recombination and repair)	COG0749(DNA polymerase)
TRINITY_DN48954_c0_g1	Cluster 1		9.25971	3.21097	0.000778464	0.013331	yes	up					ENOG410YUPY(S:Function unknown); ENOG410Y65V(S:Function unknown)	ENOG410YUPY(Retroelement); ENOG410Y65V(Retrotransposon protein)
TRINITY_DN16293_c0_g1	Cluster 1		20.7445	4.37466	0.000787388	0.0134351	yes	up
TRINITY_DN19428_c0_g2	Cluster 1		3.59289	1.84514	0.000810839	0.0137488	yes	up		K06856;phi	IGH;	map04145(Phagosome)	ENOG41116WB(S:Function unknown); ENOG410YNB1(S:Function unknown); ENOG4111XUQ(S:Function unknown)	ENOG41116WB(Immunoglobulin heavy constant epsilon); ENOG410YNB1(antigen binding); ENOG4111XUQ(antigen binding)	sp|P01855|IGHE_RAT(Ig epsilon chain C region OS=Rattus norvegicus OX=10116 PE=2 SV=1)	PF07654(C1-set:Immunoglobulin C1-set domain); PF13927(Ig_3:Immunoglobulin domain)
TRINITY_DN2860_c0_g1	Cluster 1		5.00343	2.32292	0.000834256	0.0140649	yes	up
TRINITY_DN86171_c0_g1	Cluster 1		41.1896	5.36421	0.000838871	0.014136	yes	up								PF13966(zf-RVT:zinc-binding in reverse transcriptase)
TRINITY_DN32412_c1_g1	Cluster 1	eukaryotic translation initiation factor 3 subunit M-like [Physcomitrella patens]	43.7138	5.45002	0.000843415	0.014199	yes	up	GO:0001732(biological_process:formation of cytoplasmic translation initiation complex); GO:0071541(cellular_component:eukaryotic translation initiation factor 3 complex, eIF3m); GO:0033290(cellular_component:eukaryotic 48S preinitiation complex); GO:0016282(cellular_component:eukaryotic 43S preinitiation complex); GO:0003743(molecular_function:translation initiation factor activity)	K15030	EIF3M		ENOG410XNP7(J:Translation, ribosomal structure and biogenesis)	ENOG410XNP7(formation of translation preinitiation complex)
TRINITY_DN80963_c0_g1	Cluster 1		43.7138	5.45002	0.000843415	0.014199	yes	up					ENOG411288N(S:Function unknown); ENOG410ZPN7(S:Function unknown)	ENOG411288N(-); ENOG410ZPN7(-)
TRINITY_DN8763_c0_g1	Cluster 1		13.566	3.76192	0.000847155	0.0142486	yes	up
TRINITY_DN24777_c1_g1	Cluster 1		41.0253	5.35844	0.000849147	0.0142723	yes	up
TRINITY_DN24854_c0_g1	Cluster 1		41.303	5.36818	0.000873131	0.0146053	yes	up
TRINITY_DN17817_c1_g1	Cluster 1		41.303	5.36818	0.000873131	0.0146053	yes	up					ENOG410XZB8(S:Function unknown)	ENOG410XZB8(-)
TRINITY_DN42025_c0_g3	Cluster 1	hypothetical protein AXG93_1429s1010 [Marchantia polymorpha subsp. ruderalis]	41.303	5.36818	0.000873131	0.0146053	yes	up					ENOG4111MK6(S:Function unknown)	ENOG4111MK6(Retrotransposon protein)	sp|O00370|LORF2_HUMAN(LINE-1 retrotransposable element ORF2 protein OS=Homo sapiens OX=9606 PE=1 SV=1)	PF00078(RVT_1:Reverse transcriptase (RNA-dependent DNA polymerase))
TRINITY_DN9655_c0_g1	Cluster 1		2.25195	1.17117	0.000877681	0.014671	yes	up		K08679	E5.1.3.6	map00520(Amino sugar and nucleotide sugar metabolism)	COG0451(S:Function unknown); COG1087(S:Function unknown)	COG0451(Protein of unknown function (DUF455)); COG1087(Protein of unknown function (DUF455))	sp|Q9LIS3|GAE6_ARATH(UDP-glucuronate 4-epimerase 6 OS=Arabidopsis thaliana OX=3702 GN=GAE6 PE=1 SV=1)
TRINITY_DN68609_c0_g1	Cluster 1		13.6836	3.77437	0.000880522	0.014708	yes	up
TRINITY_DN57324_c0_g1	Cluster 1		2.56914	1.36129	0.000886922	0.014794	yes	up					COG0428(J:Translation, ribosomal structure and biogenesis)	COG0428(Ribosomal protein)	sp|Q9C9Z1|ZTP50_ARATH(Putative zinc transporter At3g08650 OS=Arabidopsis thaliana OX=3702 GN=At3g08650 PE=2 SV=2)
TRINITY_DN22822_c1_g1	Cluster 1	protein FAM32A-like [Physcomitrella patens]	2.67085	1.4173	0.000899082	0.0149685	yes	up		K13120	FAM32A		ENOG41126B2(S:Function unknown)	ENOG41126B2(family with sequence similarity 32 member A)
TRINITY_DN31078_c0_g1	Cluster 1		41.3825	5.37095	0.000944156	0.0155904	yes	up
TRINITY_DN43291_c0_g1	Cluster 1		41.523	5.37584	0.000949359	0.0156617	yes	up
TRINITY_DN19751_c0_g1	Cluster 1		41.523	5.37584	0.000949359	0.0156617	yes	up		K19562	BIO3-BIO1	map00780(Biotin metabolism)	COG0161(S:Function unknown)	COG0161(Protein of unknown function (DUF1162))
TRINITY_DN61914_c0_g1	Cluster 1		48.7694	5.60791	0.000950517	0.0156771	yes	up
TRINITY_DN23382_c0_g4	Cluster 1	UDP-glucuronic acid decarboxylase 4-like [Physcomitrella patens]	14.3978	3.84778	0.00096207	0.0158307	yes	up	GO:0016021(cellular_component:integral component of membrane)	K08678	UXS1, uxs	map00520(Amino sugar and nucleotide sugar metabolism)	COG0451(S:Function unknown)	COG0451(Endonuclease Exonuclease phosphatase)	sp|Q9LZI2|UXS2_ARATH(UDP-glucuronic acid decarboxylase 2 OS=Arabidopsis thaliana OX=3702 GN=UXS2 PE=1 SV=1)
TRINITY_DN6214_c1_g1	Cluster 1		5.05476	2.33764	0.000963064	0.0158434	yes	up
TRINITY_DN38559_c0_g2	Cluster 1	hypothetical protein MARPO_0010s0030 [Marchantia polymorpha]	4.40626	2.13956	0.00097186	0.0159658	yes	up					COG5076(S:Function unknown)	COG5076(fad dependent oxidoreductase)	sp|Q9FT54|GTE6_ARATH(Transcription factor GTE6 OS=Arabidopsis thaliana OX=3702 GN=GTE6 PE=2 SV=1)
TRINITY_DN21522_c0_g3	Cluster 1		29.6561	4.89026	0.000973211	0.0159842	yes	up					ENOG410YHBV(S:Function unknown)	ENOG410YHBV(Serine threonine-protein phosphatase 7 long form homolog)	sp|Q9LNG5|PPP7L_ARATH(Serine/threonine-protein phosphatase 7 long form homolog OS=Arabidopsis thaliana OX=3702 GN=MAIL3 PE=2 SV=1)
TRINITY_DN2850_c0_g2	Cluster 1		2.97344	1.57213	0.000993014	0.0162378	yes	up
TRINITY_DN20021_c1_g1	Cluster 1		4.3297	2.11427	0.0010096	0.0164557	yes	up
TRINITY_DN22178_c1_g2	Cluster 1		31.0792	4.95788	0.00102762	0.0166917	yes	up
TRINITY_DN62886_c1_g1	Cluster 1		7.81436	2.96613	0.00103239	0.0167498	yes	up					ENOG4111AFN(S:Function unknown); COG0025(S:Function unknown)	ENOG4111AFN(-); COG0025(-)
TRINITY_DN24137_c0_g1	Cluster 1		19.8354	4.31001	0.00103983	0.0168589	yes	up
TRINITY_DN21104_c0_g1	Cluster 1		14.1976	3.82758	0.00106187	0.0171416	yes	up
TRINITY_DN63034_c0_g1	Cluster 1		4.62152	2.20837	0.00106237	0.0171456	yes	up
TRINITY_DN75744_c0_g2	Cluster 1	hypothetical protein MARPO_4038s0001, partial [Marchantia polymorpha]	27.9364	4.80408	0.00107634	0.0173237	yes	up
TRINITY_DN83491_c0_g1	Cluster 1	LOW QUALITY PROTEIN: hypothetical protein MARPO_2248s0001 [Marchantia polymorpha]	32.4956	5.02217	0.00112004	0.0179209	yes	up					ENOG4111SG9(S:Function unknown)	ENOG4111SG9(Reverse transcriptase (RNA-dependent DNA polymerase))
TRINITY_DN58443_c0_g6	Cluster 1		41.2708	5.36705	0.00113373	0.0180899	yes	up								PF03732(Retrotrans_gag:Retrotransposon gag protein)
TRINITY_DN28387_c0_g1	Cluster 1		2.6423	1.40179	0.00113903	0.0181575	yes	up
TRINITY_DN62995_c0_g2	Cluster 1		39.1452	5.29076	0.00116584	0.018478	yes	up
TRINITY_DN16350_c0_g4	Cluster 1		38.868	5.28051	0.00119196	0.0188034	yes	up
TRINITY_DN20766_c0_g2	Cluster 1		39.3636	5.29879	0.00124172	0.0194364	yes	up
TRINITY_DN4848_c0_g2	Cluster 1		2.42867	1.28017	0.00126316	0.0197153	yes	up
TRINITY_DN40867_c0_g1	Cluster 1	hypothetical protein MARPO_4316s0001 [Marchantia polymorpha]	5.05748	2.33842	0.00126794	0.0197767	yes	up					ENOG410XWUN(S:Function unknown); ENOG410Y5Z0(S:Function unknown); ENOG410Y1YS(S:Function unknown)	ENOG410XWUN(protein Sb1211s002020 source); ENOG410Y5Z0(-); ENOG410Y1YS(-)
TRINITY_DN52653_c1_g1	Cluster 1	uncharacterized protein LOC112284981 [Physcomitrella patens]	39.4522	5.30203	0.00127551	0.0198817	yes	up	GO:0015074(biological_process:DNA integration); GO:0003676(molecular_function:nucleic acid binding)						sp|Q2F7J0|POL_XMRV4(Gag-Pol polyprotein OS=Xenotropic MuLV-related virus (isolate VP42) OX=356664 GN=gag-pol PE=3 SV=1)
TRINITY_DN36797_c0_g1	Cluster 1		2.2681	1.18148	0.00128544	0.0199924	yes	up
TRINITY_DN24034_c0_g2	Cluster 1		41.7397	5.38335	0.00138364	0.0212183	yes	up
TRINITY_DN13244_c0_g1	Cluster 1	hypothetical protein SELMODRAFT_230656 [Selaginella moellendorffii]	3.33173	1.73627	0.00141999	0.021642	yes	up	GO:0020037(molecular_function:heme binding); GO:0016021(cellular_component:integral component of membrane); GO:0006979(biological_process:response to oxidative stress); GO:0005576(cellular_component:extracellular region); GO:0042744(biological_process:hydrogen peroxide catabolic process); GO:0046872(molecular_function:metal ion binding); GO:0004601(molecular_function:peroxidase activity)	K00430	E1.11.1.7	map00940(Phenylpropanoid biosynthesis)	ENOG410ZMT4(G:Carbohydrate transport and metabolism)	ENOG410ZMT4(peroxidase)	sp|Q96520|PER12_ARATH(Peroxidase 12 OS=Arabidopsis thaliana OX=3702 GN=PER12 PE=1 SV=1)	PF00141(peroxidase:Peroxidase)
TRINITY_DN54446_c0_g2	Cluster 1		27.7194	4.79282	0.00143101	0.0217678	yes	up
TRINITY_DN20985_c0_g1	Cluster 1		2.57637	1.36534	0.00143916	0.021868	yes	up
TRINITY_DN37876_c0_g2	Cluster 1		33.9486	5.08528	0.00145307	0.0220221	yes	up
TRINITY_DN10925_c0_g1	Cluster 1	hapless 2-like [Physcomitrella patens]	2.07536	1.05336	0.00146488	0.0221399	yes	up	GO:0016021(cellular_component:integral component of membrane)				ENOG4111J3I(S:Function unknown)	ENOG4111J3I(single fertilization)	sp|F4JP36|HAP2_ARATH(Protein HAPLESS 2 OS=Arabidopsis thaliana OX=3702 GN=HAP2 PE=1 SV=1)	PF10699(HAP2-GCS1:Male gamete fusion factor)
TRINITY_DN37767_c0_g1	Cluster 1		2.68046	1.42248	0.00150075	0.0225662	yes	up								PF18052(Rx_N:Rx N-terminal domain)
TRINITY_DN16699_c0_g4	Cluster 1		3.61671	1.85468	0.00150525	0.0226243	yes	up
TRINITY_DN18590_c0_g1	Cluster 1		17.4232	4.12293	0.00151064	0.022685	yes	up
TRINITY_DN45578_c0_g2	Cluster 1		3.5183	1.81488	0.00155578	0.0232109	yes	up
TRINITY_DN1957_c0_g2	Cluster 1		3.89732	1.96248	0.00157542	0.0234347	yes	up
TRINITY_DN23943_c0_g1	Cluster 1		12.2997	3.62055	0.00158737	0.0235861	yes	up
TRINITY_DN33198_c0_g4	Cluster 1		36.9878	5.20898	0.00159032	0.0236065	yes	up
TRINITY_DN30559_c0_g2	Cluster 1		36.8493	5.20357	0.00160927	0.0238377	yes	up
TRINITY_DN16660_c0_g2	Cluster 1		2.48583	1.31373	0.00164268	0.024226	yes	up
TRINITY_DN13894_c1_g1	Cluster 1		17.8897	4.16106	0.0016456	0.0242539	yes	up
TRINITY_DN69415_c0_g1	Cluster 1		37.2051	5.21743	0.00165461	0.0243511	yes	up
TRINITY_DN57603_c0_g1	Cluster 1		36.9008	5.20558	0.0016723	0.0245604	yes	up
TRINITY_DN22234_c0_g1	Cluster 1		4.88329	2.28785	0.00167812	0.0246099	yes	up
TRINITY_DN62419_c0_g1	Cluster 1		27.8224	4.79817	0.0016793	0.0246222	yes	up
TRINITY_DN17856_c0_g2	Cluster 1		39.5664	5.3062	0.00171373	0.0249869	yes	up
TRINITY_DN66093_c0_g2	Cluster 1		8.30507	3.05399	0.00172608	0.0251328	yes	up
TRINITY_DN9903_c1_g1	Cluster 1	shikimate O-hydroxycinnamoyltransferase [Selaginella moellendorffii]	2.09824	1.06918	0.00172966	0.0251777	yes	up	GO:0047172(molecular_function:shikimate O-hydroxycinnamoyltransferase activity); GO:0016747(molecular_function:transferase activity, transferring acyl groups other than amino-acyl groups)	K22889	AYT1, TRI101				sp|Q9SND9|Y3028_ARATH(Uncharacterized acetyltransferase At3g50280 OS=Arabidopsis thaliana OX=3702 GN=At3g50280 PE=3 SV=1)	PF02458(Transferase:Transferase family)
TRINITY_DN24593_c0_g3	Cluster 1		39.7101	5.31143	0.00173294	0.0252095	yes	up
TRINITY_DN15065_c0_g1	Cluster 1		2.52846	1.33826	0.00179216	0.0258743	yes	up
TRINITY_DN46917_c0_g1	Cluster 1		53.8642	5.75125	0.00182107	0.0261793	yes	up
TRINITY_DN36428_c0_g1	Cluster 1		37.2331	5.21851	0.00186503	0.0266636	yes	up
TRINITY_DN75832_c0_g2	Cluster 1	hypothetical protein AXG93_4413s1270 [Marchantia polymorpha subsp. ruderalis]	12.0953	3.59638	0.00188641	0.026916	yes	up	GO:0015074(biological_process:DNA integration); GO:0016021(cellular_component:integral component of membrane); GO:0008270(molecular_function:zinc ion binding); GO:0003676(molecular_function:nucleic acid binding)				ENOG410XS4D(S:Function unknown); COG2801(L:Replication, recombination and repair); ENOG410ZXEB(S:Function unknown)	ENOG410XS4D(Retrotransposon protein); COG2801(Retrotransposon protein); ENOG410ZXEB(Integrase core domain)	sp|P10978|POLX_TOBAC(Retrovirus-related Pol polyprotein from transposon TNT 1-94 OS=Nicotiana tabacum OX=4097 PE=2 SV=1)
TRINITY_DN77229_c0_g1	Cluster 1	hypothetical protein MARPO_0039s0120 [Marchantia polymorpha]	2.08375	1.05918	0.00193773	0.0275059	yes	up	GO:0017116(molecular_function:single-stranded DNA-dependent ATP-dependent DNA helicase activity); GO:0017108(molecular_function:5'-flap endonuclease activity); GO:0033567(biological_process:DNA replication, Okazaki fragment processing)	K10742	DNA2	map03030(DNA replication)	COG1112(L:Replication, recombination and repair)	COG1112(Helicase)	sp|A0A1P8ASY1|JHS1_ARATH(DNA replication ATP-dependent helicase/nuclease JHS1 OS=Arabidopsis thaliana OX=3702 GN=JHS1 PE=2 SV=1)	PF08696(Dna2:DNA replication factor Dna2); PF01930(Cas_Cas4:Domain of unknown function DUF83)
TRINITY_DN71060_c0_g1	Cluster 1	hypothetical protein AXG93_2752s1770 [Marchantia polymorpha subsp. ruderalis]	37.6592	5.23493	0.00197259	0.0279412	yes	up	GO:0016021(cellular_component:integral component of membrane); GO:0030246(molecular_function:carbohydrate binding); GO:0015074(biological_process:DNA integration); GO:0003676(molecular_function:nucleic acid binding); GO:0004672(molecular_function:protein kinase activity); GO:0008168(molecular_function:methyltransferase activity); GO:0005524(molecular_function:ATP binding)				COG2801(L:Replication, recombination and repair)	COG2801(Retrotransposon protein)	sp|P20825|POL2_DROME(Retrovirus-related Pol polyprotein from transposon 297 OS=Drosophila melanogaster OX=7227 GN=pol PE=4 SV=1)	PF17919(RT_RNaseH_2:RNase H-like domain found in reverse transcriptase); PF17917(RT_RNaseH:RNase H-like domain found in reverse transcriptase)
TRINITY_DN44316_c0_g1	Cluster 1	hypothetical protein AXG93_2145s1530 [Marchantia polymorpha subsp. ruderalis]	25.3502	4.66393	0.00200418	0.0282936	yes	up	GO:0016021(cellular_component:integral component of membrane)						sp|P92555|M1250_ARATH(Uncharacterized mitochondrial protein AtMg01250 OS=Arabidopsis thaliana OX=3702 GN=AtMg01250 PE=4 SV=1)	PF00078(RVT_1:Reverse transcriptase (RNA-dependent DNA polymerase))
TRINITY_DN21016_c0_g3	Cluster 1		36.7858	5.20108	0.00203068	0.028565	yes	up
TRINITY_DN20710_c2_g1	Cluster 1		8.1538	3.02747	0.00205267	0.0287369	yes	up
TRINITY_DN48579_c0_g2	Cluster 1		3.94232	1.97904	0.00205421	0.0287472	yes	up
TRINITY_DN26823_c0_g1	Cluster 1		36.9524	5.2076	0.00209453	0.0291669	yes	up
TRINITY_DN49783_c0_g1	Cluster 1		3.10648	1.63528	0.00210209	0.0292607	yes	up
TRINITY_DN33428_c0_g1	Cluster 1		7.35664	2.87905	0.00219135	0.0302886	yes	up
TRINITY_DN45690_c0_g2	Cluster 1		35.1862	5.13694	0.00222228	0.0306201	yes	up
TRINITY_DN17562_c0_g2	Cluster 1		34.8305	5.12228	0.00222347	0.0306235	yes	up
TRINITY_DN64638_c0_g1	Cluster 1		34.8305	5.12228	0.00222347	0.0306235	yes	up					ENOG410Y13W(S:Function unknown)	ENOG410Y13W(PG1 protein, homology to Homo sapiens)
TRINITY_DN74025_c0_g2	Cluster 1	hypothetical protein MARPO_0025s0001 [Marchantia polymorpha]	37.5846	5.23207	0.00222581	0.0306389	yes	up					ENOG4111JHC(S:Function unknown)	ENOG4111JHC(senescence-associated protein)	sp|Q8TGM7|ART2_YEAST(Putative uncharacterized protein ART2 OS=Saccharomyces cerevisiae (strain ATCC 204508 / S288c) OX=559292 GN=ART2 PE=5 SV=1)
TRINITY_DN87007_c0_g1	Cluster 1		35.1342	5.13481	0.00223263	0.0307088	yes	up
TRINITY_DN14836_c0_g2	Cluster 1		2.72959	1.44868	0.00227057	0.0311638	yes	up
TRINITY_DN82577_c1_g1	Cluster 1		37.2629	5.21967	0.00227555	0.03119	yes	up
TRINITY_DN40829_c0_g1	Cluster 1		37.2629	5.21967	0.00227555	0.03119	yes	up
TRINITY_DN55925_c0_g1	Cluster 1		37.121	5.21416	0.00238952	0.0324435	yes	up
TRINITY_DN48940_c0_g2	Cluster 1		17.3084	4.1134	0.00243329	0.0328878	yes	up
TRINITY_DN4574_c0_g1	Cluster 1		2.64278	1.40206	0.00244343	0.0329791	yes	up		K01889	FARSA, pheS	map00970(Aminoacyl-tRNA biosynthesis)
TRINITY_DN33790_c0_g2	Cluster 1		25.7492	4.68645	0.00249594	0.0334713	yes	up
TRINITY_DN24972_c0_g5	Cluster 1		7.69539	2.94399	0.00251536	0.0336415	yes	up
TRINITY_DN51951_c0_g1	Cluster 1	peroxidase A2-like [Selaginella moellendorffii]	39.9072	5.31858	0.00252587	0.03375	yes	up	GO:0020037(molecular_function:heme binding); GO:0006979(biological_process:response to oxidative stress); GO:0005576(cellular_component:extracellular region); GO:0042744(biological_process:hydrogen peroxide catabolic process); GO:0046872(molecular_function:metal ion binding); GO:0004601(molecular_function:peroxidase activity)	K00430	E1.11.1.7	map00940(Phenylpropanoid biosynthesis)			sp|Q43729|PER57_ARATH(Peroxidase 57 OS=Arabidopsis thaliana OX=3702 GN=PER57 PE=1 SV=1)	PF00141(peroxidase:Peroxidase)
TRINITY_DN22017_c0_g3	Cluster 1		2.09154	1.06456	0.00254535	0.0339513	yes	up
TRINITY_DN48323_c0_g3	Cluster 1	hypothetical protein SELMODRAFT_427751 [Selaginella moellendorffii]	2.99459	1.58236	0.00256448	0.0341626	yes	up							sp|P14381|YTX2_XENLA(Transposon TX1 uncharacterized 149 kDa protein OS=Xenopus laevis OX=8355 PE=4 SV=1)
TRINITY_DN18039_c0_g2	Cluster 1		34.5506	5.11064	0.00259986	0.0345432	yes	up					COG1132(V:Defense mechanisms)	COG1132((ABC) transporter)
TRINITY_DN6478_c6_g1	Cluster 1		3.97996	1.99275	0.00265078	0.0350676	yes	up
TRINITY_DN49648_c0_g1	Cluster 1	sacsin-like [Physcomitrella patens]	5.0576	2.33845	0.00265942	0.0351333	yes	up	GO:0009506(cellular_component:plasmodesma)	K17592	SACS		ENOG410XQZM(S:Function unknown)	ENOG410XQZM(Spastic ataxia of Charlevoix-Saguenay (Sacsin))	sp|Q9NZJ4|SACS_HUMAN(Sacsin OS=Homo sapiens OX=9606 GN=SACS PE=1 SV=2)
TRINITY_DN29458_c0_g2	Cluster 1	hypothetical protein AXG93_4201s1430 [Marchantia polymorpha subsp. ruderalis]	17.6847	4.14443	0.00265994	0.0351333	yes	up	GO:0005737(cellular_component:cytoplasm); GO:0004349(molecular_function:glutamate 5-kinase activity); GO:0006561(biological_process:proline biosynthetic process); GO:0004350(molecular_function:glutamate-5-semialdehyde dehydrogenase activity); GO:0055129(biological_process:L-proline biosynthetic process); GO:0005524(molecular_function:ATP binding)	K00147;K12657	proA;ALDH18A1, P5CS	map00330(Arginine and proline metabolism); map00332(Carbapenem biosynthesis)	COG0263(E:Amino acid transport and metabolism)	COG0263(Catalyzes the transfer of a phosphate group to glutamate to form glutamate 5-phosphate which rapidly cyclizes to 5- oxoproline (By similarity))	sp|P32296|P5CS_VIGAC(Delta-1-pyrroline-5-carboxylate synthase OS=Vigna aconitifolia OX=3918 PE=2 SV=1)	PF00171(Aldedh:Aldehyde dehydrogenase family)
TRINITY_DN20242_c0_g4	Cluster 1		3.75058	1.90711	0.00267916	0.0353175	yes	up
TRINITY_DN70222_c0_g1	Cluster 1		16.2793	4.02496	0.00268626	0.0354044	yes	up
TRINITY_DN13738_c0_g1	Cluster 1	hypothetical protein AXG93_4510s1160 [Marchantia polymorpha subsp. ruderalis]	3.07511	1.62064	0.00289619	0.0375718	yes	up	GO:0015074(biological_process:DNA integration); GO:0003676(molecular_function:nucleic acid binding)				COG2801(L:Replication, recombination and repair)	COG2801(Retrotransposon protein)	sp|Q94HW2|POLR1_ARATH(Retrovirus-related Pol polyprotein from transposon RE1 OS=Arabidopsis thaliana OX=3702 GN=RE1 PE=2 SV=1)	PF07727(RVT_2:Reverse transcriptase (RNA-dependent DNA polymerase))
TRINITY_DN24332_c0_g2	Cluster 1		4.89814	2.29223	0.00289644	0.0375718	yes	up					ENOG4111BA7(S:Function unknown); COG2801(L:Replication, recombination and repair)	ENOG4111BA7(Retrotransposon gag protein); COG2801(Retrotransposon protein)		PF03732(Retrotrans_gag:Retrotransposon gag protein)
TRINITY_DN22769_c0_g3	Cluster 1		35.5289	5.15092	0.00292675	0.0378907	yes	up
TRINITY_DN62073_c0_g1	Cluster 1		35.244	5.13931	0.00292696	0.0378907	yes	up
TRINITY_DN45003_c0_g1	Cluster 1		4.87427	2.28518	0.00292821	0.0378907	yes	up
TRINITY_DN77504_c0_g3	Cluster 1		11.3317	3.50229	0.00293279	0.037918	yes	up
TRINITY_DN44110_c0_g7	Cluster 1		35.4229	5.14661	0.00295436	0.0381275	yes	up
TRINITY_DN48398_c0_g4	Cluster 1		32.8634	5.03841	0.00298555	0.0384314	yes	up
TRINITY_DN10760_c0_g1	Cluster 1		2.81501	1.49314	0.00302349	0.0387926	yes	up
TRINITY_DN60657_c0_g1	Cluster 1		11.6975	3.54813	0.0030259	0.0388165	yes	up		K15283	SLC35E1		ENOG410XP1S(S:Function unknown)	ENOG410XP1S(solute carrier family 35 member)	sp|Q94B38|GPT2_ARATH(Glucose-6-phosphate/phosphate translocator 2, chloroplastic OS=Arabidopsis thaliana OX=3702 GN=GPT2 PE=2 SV=2)
TRINITY_DN51324_c0_g1	Cluster 1		33.1416	5.05057	0.00305826	0.0391321	yes	up					ENOG410YF14(S:Function unknown)	ENOG410YF14(zinc knuckle family protein)		PF00077(RVP:Retroviral aspartyl protease)
TRINITY_DN36151_c0_g1	Cluster 1		32.699	5.03117	0.00312587	0.0397954	yes	up
TRINITY_DN22571_c0_g1	Cluster 1		6.6622	2.736	0.00315192	0.0400777	yes	up
TRINITY_DN7466_c1_g1	Cluster 1		8.30235	3.05352	0.00320782	0.0405974	yes	up
TRINITY_DN18842_c0_g3	Cluster 1		11.4653	3.5192	0.00323492	0.0408379	yes	up
TRINITY_DN26753_c0_g1	Cluster 1		10.9779	3.45653	0.00323687	0.040838	yes	up
TRINITY_DN3203_c2_g1	Cluster 1		5.40096	2.43322	0.00326456	0.0411092	yes	up
TRINITY_DN81522_c0_g1	Cluster 1		24.589	4.61994	0.00327749	0.0412344	yes	up
TRINITY_DN16541_c0_g3	Cluster 1		33.1169	5.0495	0.00329606	0.0414027	yes	up
TRINITY_DN32960_c1_g2	Cluster 1		23.1502	4.53295	0.00329675	0.0414039	yes	up
TRINITY_DN83052_c0_g1	Cluster 1		24.7296	4.62817	0.00335554	0.042007	yes	up
TRINITY_DN69731_c0_g1	Cluster 1		33.2841	5.05676	0.00336163	0.0420543	yes	up					ENOG410Y13W(S:Function unknown); ENOG4111VRG(S:Function unknown); COG0048(J:Translation, ribosomal structure and biogenesis)	ENOG410Y13W(PG1 protein, homology to Homo sapiens); ENOG4111VRG(-); COG0048(Interacts with and stabilizes bases of the 16S rRNA that are involved in tRNA selection in the A site and with the mRNA backbone. Located at the interface of the 30S and 50S subunits, it traverses the body of the 30S subunit contacting proteins on the other side and probably holding the rRNA structure together. The combin…
TRINITY_DN15028_c0_g1	Cluster 1	hypothetical protein AXG93_1130s1780 [Marchantia polymorpha subsp. ruderalis]	32.6461	5.02884	0.00342347	0.0426236	yes	up	GO:0006401(biological_process:RNA catabolic process); GO:0003724(molecular_function:RNA helicase activity); GO:0003676(molecular_function:nucleic acid binding); GO:0005524(molecular_function:ATP binding)	bvg;K12854	;SNRNP200, BRR2	map03040(Spliceosome)	COG1204(I:Lipid transport and metabolism)	COG1204(Dehydrogenase)	sp|Q9SYP1|DEXHC_ARATH(DExH-box ATP-dependent RNA helicase DExH12 OS=Arabidopsis thaliana OX=3702 GN=BRR2A PE=1 SV=1)
TRINITY_DN32254_c0_g1	Cluster 1		11.6667	3.54432	0.00347155	0.0431316	yes	up
TRINITY_DN32114_c0_g1	Cluster 1		23.4904	4.554	0.00354892	0.0438921	yes	up
TRINITY_DN45890_c1_g2	Cluster 1		33.4536	5.06409	0.00355536	0.0439334	yes	up
TRINITY_DN35219_c0_g2	Cluster 1		7.74602	2.95346	0.0035718	0.0440748	yes	up								PF17919(RT_RNaseH_2:RNase H-like domain found in reverse transcriptase); PF17917(RT_RNaseH:RNase H-like domain found in reverse transcriptase)
TRINITY_DN5666_c0_g1	Cluster 1		2.38615	1.25468	0.00373491	0.0457362	yes	up
TRINITY_DN38056_c0_g1	Cluster 1		3.76571	1.91292	0.00380737	0.0463983	yes	up
TRINITY_DN89469_c0_g1	Cluster 1		22.2396	4.47506	0.00386878	0.0470007	yes	up
TRINITY_DN37606_c0_g2	Cluster 1	hypothetical protein AXG93_4324s1140 [Marchantia polymorpha subsp. ruderalis]	2.62926	1.39466	0.00390674	0.047334	yes	up	GO:0005524(molecular_function:ATP binding)	K09490	HSPA5, BIP	map03060(Protein export); map04141(Protein processing in endoplasmic reticulum)	COG0443(S:Function unknown)	COG0443(Plant phosphoribosyltransferase C-terminal)	sp|Q03684|BIP4_TOBAC(Luminal-binding protein 4 OS=Nicotiana tabacum OX=4097 GN=BIP4 PE=2 SV=1)	PF00012(HSP70:Hsp70 protein); PF06723(MreB_Mbl:MreB/Mbl protein); PF14450(FtsA:Cell division protein FtsA)
TRINITY_DN57540_c0_g1	Cluster 1		5.05145	2.3367	0.00391622	0.0474141	yes	up
TRINITY_DN24262_c0_g3	Cluster 1		9.76761	3.28801	0.00410733	0.0491384	yes	up
TRINITY_DN69774_c0_g4	Cluster 1		11.4187	3.51332	0.00413104	0.0493887	yes	up
TRINITY_DN31380_c0_g1	Cluster 1		23.2606	4.53982	0.0041364	0.049436	yes	up
TRINITY_DN17157_c0_g1	Cluster 1		6.32488	2.66104	0.00413717	0.0494369	yes	up
TRINITY_DN70461_c0_g1	Cluster 1		3.34902	1.74374	0.00415007	0.0495419	yes	up
TRINITY_DN67159_c0_g1	Cluster 1		30.9834	4.95342	0.0041724	0.0497569	yes	up
TRINITY_DN27211_c1_g2	Cluster 1		30.9834	4.95342	0.0041724	0.0497569	yes	up								PF13966(zf-RVT:zinc-binding in reverse transcriptase)
TRINITY_DN1057_c0_g1	Cluster 4	boron transporter 1 [Selaginella moellendorffii]	10.7196	3.42218	7.75635e-57	3.14576e-53	yes	up	GO:0005452(molecular_function:inorganic anion exchanger activity); GO:0016021(cellular_component:integral component of membrane)				ENOG410XPHD(U:Intracellular trafficking, secretion, and vesicular transport)	ENOG410XPHD(solute carrier family 4)	sp|Q9XI23|BOR4_ARATH(Boron transporter 4 OS=Arabidopsis thaliana OX=3702 GN=BOR4 PE=2 SV=1)	PF00955(HCO3_cotransp:HCO3- transporter family)
TRINITY_DN1575_c0_g1	Cluster 4	early light-induced protein 1, chloroplastic [Selaginella moellendorffii]	17.5847	4.13625	3.32109e-49	1.02025e-45	yes	up	GO:0016021(cellular_component:integral component of membrane); GO:0009507(cellular_component:chloroplast)				ENOG410Y0RG(S:Function unknown)	ENOG410Y0RG(early light-induced protein)	sp|P93735|ELIP1_ARATH(Early light-induced protein 1, chloroplastic OS=Arabidopsis thaliana OX=3702 GN=ELIP1 PE=1 SV=1)	PF00504(Chloroa_b-bind:Chlorophyll A-B binding protein)
TRINITY_DN8828_c0_g1	Cluster 4		3.41216	1.77069	7.82075e-28	6.42548e-25	yes	up								PF17983(Tryp_inh:Trypsin inhibitors 1,2 and 3)
TRINITY_DN5423_c0_g1	Cluster 4	hexokinase-1 [Selaginella moellendorffii]	2.96887	1.56991	1.84134e-21	9.56646e-19	yes	up	GO:0005829(cellular_component:cytosol); GO:0008865(molecular_function:fructokinase activity); GO:0016021(cellular_component:integral component of membrane); GO:0004396(molecular_function:hexokinase activity); GO:0004340(molecular_function:glucokinase activity); GO:0005623(cellular_component:cell); GO:0019158(molecular_function:mannokinase activity); GO:0001678(biological_process:cellular glucose …	K00844	HK	map00520(Amino sugar and nucleotide sugar metabolism); map00010(Glycolysis / Gluconeogenesis); map00500(Starch and sucrose metabolism); map00051(Fructose and mannose metabolism); map00052(Galactose metabolism)	COG5026(G:Carbohydrate transport and metabolism)	COG5026(hexokinase)	sp|Q9SEK3|HXK1_SPIOL(Hexokinase-1 OS=Spinacia oleracea OX=3562 GN=HXK1 PE=2 SV=1)	PF03727(Hexokinase_2:Hexokinase); PF00349(Hexokinase_1:Hexokinase)
TRINITY_DN25898_c0_g1	Cluster 4		15.9012	3.99106	2.08025e-21	1.07176e-18	yes	up							sp|Q9LMT7|MAIN_ARATH(Protein MAINTENANCE OF MERISTEMS OS=Arabidopsis thaliana OX=3702 GN=MAIN PE=1 SV=1)	PF10536(PMD:Plant mobile domain); PF09331(DUF1985:Domain of unknown function (DUF1985))
TRINITY_DN16179_c0_g1	Cluster 4	uncharacterized protein LOC112290246 [Physcomitrella patens]	2.222	1.15186	7.46612e-17	2.36562e-14	yes	up	GO:0016021(cellular_component:integral component of membrane)				ENOG410ZJZP(S:Function unknown)	ENOG410ZJZP(Nhl repeatcontaining protein)		PF01436(NHL:NHL repeat)
TRINITY_DN13588_c0_g1	Cluster 4	enolase isoform X2 [Selaginella moellendorffii]	2.02889	1.02069	2.73098e-16	8.00677e-14	yes	up	GO:0000015(cellular_component:phosphopyruvate hydratase complex); GO:0000287(molecular_function:magnesium ion binding); GO:0004634(molecular_function:phosphopyruvate hydratase activity); GO:0006096(biological_process:glycolytic process)	K01689	ENO, eno	map03018(RNA degradation); map00010(Glycolysis / Gluconeogenesis)	COG0148(G:Carbohydrate transport and metabolism)	COG0148(Catalyzes the reversible conversion of 2- phosphoglycerate into phosphoenolpyruvate. It is essential for the degradation of carbohydrates via glycolysis (By similarity))	sp|Q43130|ENO_MESCR(Enolase OS=Mesembryanthemum crystallinum OX=3544 GN=PGH1 PE=2 SV=1)	PF00113(Enolase_C:Enolase, C-terminal TIM barrel domain); PF03952(Enolase_N:Enolase, N-terminal domain); PF13378(MR_MLE_C:Enolase C-terminal domain-like); PF07476(MAAL_C:Methylaspartate ammonia-lyase C-terminus)
TRINITY_DN21896_c0_g1	Cluster 4	probable 2-oxoglutarate-dependent dioxygenase ANS [Selaginella moellendorffii]	3.85034	1.94498	6.95952e-16	1.98282e-13	yes	up	GO:0046872(molecular_function:metal ion binding); GO:0051213(molecular_function:dioxygenase activity); GO:0016491(molecular_function:oxidoreductase activity)				COG3491(S:Function unknown)	COG3491(2OGFe(II) oxygenase)	sp|O80449|DIOX4_ARATH(Probable 2-oxoglutarate-dependent dioxygenase ANS OS=Arabidopsis thaliana OX=3702 GN=ANS PE=2 SV=1)	PF14226(DIOX_N:non-haem dioxygenase in morphine synthesis N-terminal); PF03171(2OG-FeII_Oxy:2OG-Fe(II) oxygenase superfamily)
TRINITY_DN2596_c0_g1	Cluster 4		3.04219	1.60511	8.3623e-15	2.02348e-12	yes	up
TRINITY_DN77241_c0_g1	Cluster 4		6.2264	2.6384	9.02814e-14	1.90799e-11	yes	up					ENOG4111ADI(S:Function unknown)	ENOG4111ADI(Mediator complex subunit 28)	sp|Q9SS87|SEOB_ARATH(Protein SIEVE ELEMENT OCCLUSION B OS=Arabidopsis thaliana OX=3702 GN=SEOB PE=1 SV=1)	PF14576(SEO_N:Sieve element occlusion N-terminus); PF14577(SEO_C:Sieve element occlusion C-terminus)
TRINITY_DN21621_c0_g1	Cluster 4	universal stress protein PHOS34 [Selaginella moellendorffii]	3.11592	1.63966	4.08758e-13	7.66091e-11	yes	up					COG0589(S:Function unknown)	COG0589(-)	sp|Q8LGG8|USPAL_ARATH(Universal stress protein A-like protein OS=Arabidopsis thaliana OX=3702 GN=At3g01520 PE=1 SV=2)	PF00582(Usp:Universal stress protein family)
TRINITY_DN9199_c0_g1	Cluster 4	lysine histidine transporter-like 8 [Selaginella moellendorffii]	2.13675	1.09542	6.89087e-13	1.2389e-10	yes	up	GO:0016021(cellular_component:integral component of membrane)				COG0814(E:Amino acid transport and metabolism)	COG0814(amino acid transport)	sp|Q9SX98|LHTL8_ARATH(Lysine histidine transporter-like 8 OS=Arabidopsis thaliana OX=3702 GN=AATL1 PE=1 SV=1)	PF01490(Aa_trans:Transmembrane amino acid transporter protein)
TRINITY_DN16856_c0_g1	Cluster 4	hypothetical protein MARPO_0061s0061 [Marchantia polymorpha]	3.23655	1.69445	1.3433e-12	2.28707e-10	yes	up	GO:0046872(molecular_function:metal ion binding)						sp|Q947D2|PRAF1_ARATH(PH, RCC1 and FYVE domains-containing protein 1 OS=Arabidopsis thaliana OX=3702 GN=PRAF1 PE=1 SV=1)	PF00415(RCC1:Regulator of chromosome condensation (RCC1) repeat); PF13540(RCC1_2:Regulator of chromosome condensation (RCC1) repeat); PF08381(BRX:Transcription factor regulating root and shoot growth via Pin3); PF01363(FYVE:FYVE zinc finger); PF13713(BRX_N:Transcription factor BRX N-terminal domain); PF16457(PH_12:Pleckstrin homology domain)
TRINITY_DN183_c0_g1	Cluster 4		13.0665	3.7078	6.18278e-12	9.12018e-10	yes	up
TRINITY_DN3646_c3_g1	Cluster 4	pentatricopeptide repeat-containing protein At3g12770-like [Physcomitrella patens]	5.59127	2.48318	3.11673e-11	4.10856e-09	yes	up	GO:0043231(cellular_component:intracellular membrane-bounded organelle); GO:0008270(molecular_function:zinc ion binding); GO:0009451(biological_process:RNA modification)				ENOG410Z7Z7(S:Function unknown)	ENOG410Z7Z7(Pentatricopeptide repeat-containing protein)	sp|Q9LJI9|PP260_ARATH(Pentatricopeptide repeat-containing protein At3g28660 OS=Arabidopsis thaliana OX=3702 GN=PCMP-E80 PE=2 SV=1)	PF01535(PPR:PPR repeat); PF13041(PPR_2:PPR repeat family)
TRINITY_DN6243_c0_g1	Cluster 4	probable leucine-rich repeat receptor-like protein kinase At5g63930 isoform X1 [Physcomitrella patens]	3.76468	1.91253	3.95505e-11	5.1444e-09	yes	up					ENOG41107RG(S:Function unknown)	ENOG41107RG(Leucine-rich repeat protein FLR1)	sp|Q9M5J8|PGIP2_ARATH(Polygalacturonase inhibitor 2 OS=Arabidopsis thaliana OX=3702 GN=PGIP2 PE=2 SV=2)	PF13855(LRR_8:Leucine rich repeat); PF12799(LRR_4:Leucine Rich repeats (2 copies)); PF08263(LRRNT_2:Leucine rich repeat N-terminal domain)
TRINITY_DN12909_c0_g1	Cluster 4		3.3002	1.72255	5.47668e-11	6.9101e-09	yes	up
TRINITY_DN844_c0_g1	Cluster 4	hypothetical protein SELMODRAFT_105398 [Selaginella moellendorffii]	2.0893	1.06302	6.0882e-11	7.60025e-09	yes	up	GO:0016874(molecular_function:ligase activity); GO:0004842(molecular_function:ubiquitin-protein transferase activity); GO:0007166(biological_process:cell surface receptor signaling pathway)				ENOG410XSRG(S:Function unknown); ENOG410XRTN(S:Function unknown)	ENOG410XSRG(Ankyrin and armadillo repeat containing); ENOG410XRTN(Ankyrin and armadillo repeat containing)	sp|A2ZLU6|SL11_ORYSI(Protein spotted leaf 11 OS=Oryza sativa subsp. indica OX=39946 GN=SPL11 PE=1 SV=2)	PF00514(Arm:Armadillo/beta-catenin-like repeat); PF13646(HEAT_2:HEAT repeats)
TRINITY_DN82946_c0_g2	Cluster 4		3.61919	1.85567	9.1029e-11	1.10894e-08	yes	up								PF13599(Pentapeptide_4:Pentapeptide repeats (9 copies))
TRINITY_DN6472_c0_g1	Cluster 4	flavone synthase [Pohlia nutans]	2.13816	1.09637	2.18505e-10	2.50632e-08	yes	up	GO:0046872(molecular_function:metal ion binding); GO:0051213(molecular_function:dioxygenase activity); GO:0016491(molecular_function:oxidoreductase activity)	K05933	E1.14.17.4	map00270(Cysteine and methionine metabolism)	COG3491(S:Function unknown)	COG3491(2OGFe(II) oxygenase)	sp|Q9ZUN4|ACCO1_ARATH(1-aminocyclopropane-1-carboxylate oxidase 1 OS=Arabidopsis thaliana OX=3702 GN=ACO1 PE=2 SV=1)	PF03171(2OG-FeII_Oxy:2OG-Fe(II) oxygenase superfamily)
TRINITY_DN2596_c1_g1	Cluster 4		2.19369	1.13336	2.93297e-10	3.25329e-08	yes	up
TRINITY_DN22203_c0_g2	Cluster 4	caffeic acid 3-O-methyltransferase 1 [Selaginella moellendorffii]	6.8179	2.76933	7.2251e-10	7.35597e-08	yes	up	GO:0047763(molecular_function:caffeate O-methyltransferase activity); GO:0046983(molecular_function:protein dimerization activity); GO:0032259(biological_process:methylation); GO:0008171(molecular_function:O-methyltransferase activity)	K13066	E2.1.1.68, COMT	map00940(Phenylpropanoid biosynthesis)	ENOG410XS7T(S:Function unknown)	ENOG410XS7T(Uncharacterized conserved protein (DUF2215))	sp|Q00763|COMT1_POPTM(Caffeic acid 3-O-methyltransferase 1 OS=Populus tremuloides OX=3693 GN=OMT1 PE=1 SV=1)	PF00891(Methyltransf_2:O-methyltransferase domain); PF08100(Dimerisation:Dimerisation domain)
TRINITY_DN21920_c0_g2	Cluster 4	peroxidase P7 [Selaginella moellendorffii]	5.43884	2.4433	1.4102e-09	1.33209e-07	yes	up	GO:0020037(molecular_function:heme binding); GO:0006979(biological_process:response to oxidative stress); GO:0005576(cellular_component:extracellular region); GO:0042744(biological_process:hydrogen peroxide catabolic process); GO:0046872(molecular_function:metal ion binding); GO:0004601(molecular_function:peroxidase activity)	K00430	E1.11.1.7	map00940(Phenylpropanoid biosynthesis)	ENOG410ZMT4(G:Carbohydrate transport and metabolism)	ENOG410ZMT4(peroxidase)	sp|Q96520|PER12_ARATH(Peroxidase 12 OS=Arabidopsis thaliana OX=3702 GN=PER12 PE=1 SV=1)
TRINITY_DN5321_c0_g1	Cluster 4	aspartyl protease family protein 2 [Selaginella moellendorffii]	2.49137	1.31694	1.72678e-09	1.59489e-07	yes	up	GO:0004190(molecular_function:aspartic-type endopeptidase activity)				ENOG410XNV7(O:Posttranslational modification, protein turnover, chaperones)	ENOG410XNV7(aspartic)	sp|P0DO21|GIP2_NICBE(Probable aspartic proteinase GIP2 OS=Nicotiana benthamiana OX=4100 GN=GIP2 PE=1 SV=1)	PF14541(TAXi_C:Xylanase inhibitor C-terminal); PF14543(TAXi_N:Xylanase inhibitor N-terminal)
TRINITY_DN29389_c0_g1	Cluster 4		3.10497	1.63458	4.47102e-09	3.81994e-07	yes	up
TRINITY_DN13413_c0_g1	Cluster 4	bidirectional sugar transporter SWEET4 [Selaginella moellendorffii]	3.26043	1.70506	8.676e-09	7.00594e-07	yes	up	GO:0016021(cellular_component:integral component of membrane); GO:0005886(cellular_component:plasma membrane); GO:0008643(biological_process:carbohydrate transport)	K15382	SLC50A, SWEET		ENOG4111M4R(U:Intracellular trafficking, secretion, and vesicular transport)	ENOG4111M4R(sugar transporter)	sp|Q84WN3|SWT17_ARATH(Bidirectional sugar transporter SWEET17 OS=Arabidopsis thaliana OX=3702 GN=SWEET17 PE=1 SV=2)	PF03083(MtN3_slv:Sugar efflux transporter for intercellular exchange)
TRINITY_DN7560_c0_g1	Cluster 4	phytepsin-like [Physcomitrella patens]	2.0664	1.04712	9.12427e-09	7.34275e-07	yes	up	GO:0004190(molecular_function:aspartic-type endopeptidase activity); GO:0006629(biological_process:lipid metabolic process)	K08245	E3.4.23.40		ENOG410XNV7(O:Posttranslational modification, protein turnover, chaperones)	ENOG410XNV7(aspartic)	sp|O04057|ASPR_CUCPE(Aspartic proteinase OS=Cucurbita pepo OX=3663 PE=2 SV=1)	PF00026(Asp:Eukaryotic aspartyl protease); PF03489(SapB_2:Saposin-like type B, region 2); PF14543(TAXi_N:Xylanase inhibitor N-terminal); PF05184(SapB_1:Saposin-like type B, region 1)
TRINITY_DN45404_c0_g1	Cluster 4		3.1951	1.67586	1.017e-08	8.10129e-07	yes	up		K23490	CYB5
TRINITY_DN18865_c0_g1	Cluster 4	hypothetical protein SELMODRAFT_402373 [Selaginella moellendorffii]	2.92399	1.54794	2.43754e-08	1.75565e-06	yes	up	GO:0030674(molecular_function:protein binding, bridging); GO:0051015(molecular_function:actin filament binding)				ENOG41122DF(S:Function unknown)	ENOG41122DF(-)		PF07468(Agglutinin:Agglutinin domain)
TRINITY_DN4694_c0_g1	Cluster 4	hypothetical protein SELMODRAFT_132659, partial [Selaginella moellendorffii]	2.28733	1.19366	6.213e-08	4.04626e-06	yes	up	GO:0046983(molecular_function:protein dimerization activity)				ENOG410YRG3(S:Function unknown)	ENOG410YRG3(ethylene-responsive protein)	sp|Q7XJU2|BH153_ARATH(Transcription factor bHLH153 OS=Arabidopsis thaliana OX=3702 GN=BHLH153 PE=1 SV=1)
TRINITY_DN31914_c1_g1	Cluster 4	linamarin synthase 2 [Selaginella moellendorffii]	2.31161	1.2089	1.3711e-07	8.1961e-06	yes	up	GO:0016758(molecular_function:transferase activity, transferring hexosyl groups)				COG1819(S:Function unknown)	COG1819(Transferase)	sp|Q66PF2|URT1_FRAAN(Putative UDP-rhamnose:rhamnosyltransferase 1 OS=Fragaria ananassa OX=3747 GN=GT4 PE=2 SV=1)	PF00201(UDPGT:UDP-glucoronosyl and UDP-glucosyl transferase)
TRINITY_DN4046_c0_g1	Cluster 4	thaumatin-like protein isoform X2 [Physcomitrella patens]	6.68191	2.74026	1.49847e-07	8.87488e-06	yes	up					ENOG410YD4X(S:Function unknown)	ENOG410YD4X(thaumatin-like protein)	sp|P25096|P21_SOYBN(Protein P21 OS=Glycine max OX=3847 PE=1 SV=1)	PF00314(Thaumatin:Thaumatin family)
TRINITY_DN7508_c0_g1	Cluster 4	protein EXORDIUM-like 3 [Selaginella moellendorffii]	2.52636	1.33706	1.51117e-07	8.93513e-06	yes	up					ENOG410Y43B(S:Function unknown)	ENOG410Y43B(phosphate-induced protein 1 conserved region domain containing protein, expressed)	sp|Q9SII5|EXOL5_ARATH(Protein EXORDIUM-like 5 OS=Arabidopsis thaliana OX=3702 GN=EXL5 PE=2 SV=1)	PF04674(Phi_1:Phosphate-induced protein 1 conserved region)
TRINITY_DN6320_c2_g1	Cluster 4	hypothetical protein AXG93_1333s1150 [Marchantia polymorpha subsp. ruderalis]	2.10309	1.07251	1.82755e-07	1.05931e-05	yes	up	GO:0006564(biological_process:L-serine biosynthetic process); GO:0016616(molecular_function:oxidoreductase activity, acting on the CH-OH group of donors, NAD or NADP as acceptor); GO:0051287(molecular_function:NAD binding); GO:0006520(biological_process:cellular amino acid metabolic process); GO:0004617(molecular_function:phosphoglycerate dehydrogenase activity); GO:0055114(biological_process:oxi…	K00058	serA, PHGDH	map00270(Cysteine and methionine metabolism); map00260(Glycine, serine and threonine metabolism)	COG0111(E:Amino acid transport and metabolism)	COG0111(Dehydrogenase)	sp|O49485|SERA1_ARATH(D-3-phosphoglycerate dehydrogenase 1, chloroplastic OS=Arabidopsis thaliana OX=3702 GN=PGDH1 PE=1 SV=1)	PF02826(2-Hacid_dh_C:D-isomer specific 2-hydroxyacid dehydrogenase, NAD binding domain); PF00389(2-Hacid_dh:D-isomer specific 2-hydroxyacid dehydrogenase, catalytic domain); PF07991(IlvN:Acetohydroxy acid isomeroreductase, NADPH-binding domain); PF00670(AdoHcyase_NAD:S-adenosyl-L-homocysteine hydrolase, NAD binding domain)
TRINITY_DN7947_c0_g2	Cluster 4	disease resistance protein TAO1-like [Physcomitrella patens]	2.19227	1.13242	2.00652e-07	1.15264e-05	yes	up	GO:0043531(molecular_function:ADP binding)				COG4886(S:Function unknown)	COG4886(leucine Rich Repeat)	sp|Q9FJB5|RP8L3_ARATH(Disease resistance RPP8-like protein 3 OS=Arabidopsis thaliana OX=3702 GN=RPP8L3 PE=2 SV=1)	PF00931(NB-ARC:NB-ARC domain)
TRINITY_DN29150_c0_g4	Cluster 4		16.1541	4.01383	2.05545e-07	1.17502e-05	yes	up
TRINITY_DN23145_c0_g1	Cluster 4	hypothetical protein AXG93_461s1200 [Marchantia polymorpha subsp. ruderalis]	122.328	6.93461	2.92836e-07	1.60769e-05	yes	up	GO:0003735(molecular_function:structural constituent of ribosome); GO:0006412(biological_process:translation); GO:0005840(cellular_component:ribosome)	K02925	RP-L3e, RPL3	map03010(Ribosome)	COG0087(S:Function unknown)	COG0087(-)	sp|P22738|RL32_ARATH(60S ribosomal protein L3-2 OS=Arabidopsis thaliana OX=3702 GN=ARP2 PE=2 SV=4)	PF00297(Ribosomal_L3:Ribosomal protein L3)
TRINITY_DN13426_c1_g1	Cluster 4	hypothetical protein PHYPA_007050 [Physcomitrella patens]	2.58915	1.37248	1.03317e-06	4.87539e-05	yes	up	GO:0006355(biological_process:regulation of transcription, DNA-templated)				ENOG410ZJVC(S:Function unknown)	ENOG410ZJVC(transposon protein)	sp|Q9SZL8|FRS5_ARATH(Protein FAR1-RELATED SEQUENCE 5 OS=Arabidopsis thaliana OX=3702 GN=FRS5 PE=1 SV=1)	PF10551(MULE:MULE transposase domain); PF03101(FAR1:FAR1 DNA-binding domain); PF00872(Transposase_mut:Transposase, Mutator family)
TRINITY_DN39459_c0_g1	Cluster 4		2.2168	1.14848	1.07374e-06	5.02767e-05	yes	up					ENOG410YZKG(S:Function unknown)	ENOG410YZKG(wound induced protein)		PF12609(DUF3774:Wound-induced protein)
TRINITY_DN44315_c0_g2	Cluster 4	aldehyde dehydrogenase family 2 member B7, mitochondrial [Selaginella moellendorffii]	2.32602	1.21786	1.37247e-06	6.20835e-05	yes	up	GO:0016620(molecular_function:oxidoreductase activity, acting on the aldehyde or oxo group of donors, NAD or NADP as acceptor)	K12355	REF1	map00940(Phenylpropanoid biosynthesis)			sp|Q56YU0|AL2C4_ARATH(Aldehyde dehydrogenase family 2 member C4 OS=Arabidopsis thaliana OX=3702 GN=ALDH2C4 PE=1 SV=2)	PF00171(Aldedh:Aldehyde dehydrogenase family)
TRINITY_DN5897_c0_g1	Cluster 4		2.46521	1.30171	1.48567e-06	6.67345e-05	yes	up
TRINITY_DN14676_c0_g1	Cluster 4	gibberellin 20 oxidase [Lygodium japonicum]	3.35007	1.74419	2.1242e-06	9.07433e-05	yes	up	GO:0046872(molecular_function:metal ion binding); GO:0051213(molecular_function:dioxygenase activity); GO:0016491(molecular_function:oxidoreductase activity)				COG3491(S:Function unknown)	COG3491(2OGFe(II) oxygenase)	sp|Q39112|GAOX3_ARATH(Gibberellin 20 oxidase 3 OS=Arabidopsis thaliana OX=3702 GN=GA20OX3 PE=2 SV=1)	PF03171(2OG-FeII_Oxy:2OG-Fe(II) oxygenase superfamily); PF14226(DIOX_N:non-haem dioxygenase in morphine synthesis N-terminal)
TRINITY_DN38660_c0_g2	Cluster 4		5.85475	2.54961	2.21056e-06	9.39214e-05	yes	up		K15044	AGFG1		ENOG41122WA(C:Energy production and conversion)	ENOG41122WA(aconitate hydratase)	sp|Q8RXE7|AGD14_ARATH(Probable ADP-ribosylation factor GTPase-activating protein AGD14 OS=Arabidopsis thaliana OX=3702 GN=AGD14 PE=1 SV=2)
TRINITY_DN1486_c0_g1	Cluster 4	annexin A4 isoform X2 [Selaginella moellendorffii]	2.57115	1.36241	3.16238e-06	0.000128269	yes	up	GO:0005544(molecular_function:calcium-dependent phospholipid binding); GO:0005509(molecular_function:calcium ion binding)	K17098	ANNAT				sp|P51074|ANX4_FRAAN(Annexin-like protein RJ4 OS=Fragaria ananassa OX=3747 PE=2 SV=2)	PF00191(Annexin:Annexin)
TRINITY_DN19368_c0_g1	Cluster 4	phosphate transporter 1;3 [Pteris vittata]	2.30152	1.20259	3.7606e-06	0.000149193	yes	up	GO:0006817(biological_process:phosphate ion transport); GO:0016021(cellular_component:integral component of membrane); GO:0005315(molecular_function:inorganic phosphate transmembrane transporter activity)	K08176	PHO84		ENOG410ZVN7(G:Carbohydrate transport and metabolism)	ENOG410ZVN7(phosphate transporter)	sp|A7KTC5|PHT11_PETHY(Low affinity inorganic phosphate transporter 1 OS=Petunia hybrida OX=4102 GN=PT1 PE=2 SV=1)	PF00083(Sugar_tr:Sugar (and other) transporter); PF07690(MFS_1:Major Facilitator Superfamily)
TRINITY_DN1094_c0_g1	Cluster 4		5.00567	2.32356	5.40516e-06	0.000205109	yes	up					COG5068(K:Transcription)	COG5068(Transcription factor)
TRINITY_DN23080_c0_g1	Cluster 4	hypothetical protein AXG93_4170s1190 [Marchantia polymorpha subsp. ruderalis]	2.4526	1.29431	5.57006e-06	0.000210237	yes	up	GO:0102305(molecular_function:(13E)-labda-7,13-dien-15-ol synthase activity); GO:0010333(molecular_function:terpene synthase activity); GO:0000287(molecular_function:magnesium ion binding); GO:0009686(biological_process:gibberellin biosynthetic process); GO:0009905(molecular_function:ent-copalyl diphosphate synthase activity); GO:0016114(biological_process:terpenoid biosynthetic process); GO:0009…	K15803	GERD	map00909(Sesquiterpenoid and triterpenoid biosynthesis)	ENOG41118IF(S:Function unknown); ENOG410YBXH(S:Function unknown)	ENOG41118IF(Terpene synthase, N-terminal domain); ENOG410YBXH(synthase)	sp|Q6Q3H2|TPSVS_VITVI(Valencene synthase OS=Vitis vinifera OX=29760 GN=ValCS PE=1 SV=1)	PF01397(Terpene_synth:Terpene synthase, N-terminal domain); PF03936(Terpene_synth_C:Terpene synthase family, metal binding domain)
TRINITY_DN27501_c0_g1	Cluster 4	flavonoid 3'-monooxygenase [Selaginella moellendorffii]	2.28326	1.1911	6.14086e-06	0.000227527	yes	up	GO:0005506(molecular_function:iron ion binding); GO:0016705(molecular_function:oxidoreductase activity, acting on paired donors, with incorporation or reduction of molecular oxygen); GO:0016021(cellular_component:integral component of membrane); GO:0004497(molecular_function:monooxygenase activity); GO:0020037(molecular_function:heme binding)	K20617	CYP71A		COG2124(S:Function unknown)	COG2124(Component of the eukaryotic translation initiation factor 3 (eIF-3) complex, which is involved in protein synthesis and, together with other initiation factors, stimulates binding of mRNA and methionyl-tRNAi to the 40S ribosome (By similarity))	sp|O81970|C71A9_SOYBN(Cytochrome P450 71A9 OS=Glycine max OX=3847 GN=CYP71A9 PE=2 SV=1)	PF00067(p450:Cytochrome P450)
TRINITY_DN28253_c0_g1	Cluster 4		13.0647	3.7076	6.81746e-06	0.000248535	yes	up					ENOG410XVWA(S:Function unknown); ENOG410XZB8(S:Function unknown); ENOG4111JHC(S:Function unknown)	ENOG410XVWA(-); ENOG410XZB8(-); ENOG4111JHC(senescence-associated protein)
TRINITY_DN28785_c0_g1	Cluster 4		79.5351	6.31352	9.45554e-06	0.000328143	yes	up
TRINITY_DN2285_c0_g2	Cluster 4		2.03576	1.02557	1.34998e-05	0.00044656	yes	up
TRINITY_DN16723_c0_g1	Cluster 4	germin-like protein 1-1 [Selaginella moellendorffii]	2.06025	1.04282	1.49048e-05	0.000488013	yes	up	GO:0048046(cellular_component:apoplast); GO:0005618(cellular_component:cell wall); GO:0005576(cellular_component:extracellular region); GO:0030145(molecular_function:manganese ion binding); GO:0045735(molecular_function:nutrient reservoir activity)						sp|Q9ZRA4|AB19A_PRUPE(Auxin-binding protein ABP19a OS=Prunus persica OX=3760 GN=ABP19A PE=3 SV=1)	PF00190(Cupin_1:Cupin); PF07883(Cupin_2:Cupin domain)
TRINITY_DN1472_c1_g1	Cluster 4		34.9291	5.12636	1.91035e-05	0.00060071	yes	up		K17193	UGT79B1	map00942(Anthocyanin biosynthesis)	COG1819(S:Function unknown)	COG1819(Transferase)	sp|Q9LJA6|U79B4_ARATH(UDP-glycosyltransferase 79B4 OS=Arabidopsis thaliana OX=3702 GN=UGT79B4 PE=2 SV=1)
TRINITY_DN7333_c0_g1	Cluster 4	hypothetical protein MARPO_0030s0072 [Marchantia polymorpha]	3.22307	1.68844	2.40264e-05	0.000729927	yes	up	GO:0016021(cellular_component:integral component of membrane)				ENOG410YVQQ(S:Function unknown)	ENOG410YVQQ(early nodulin)	sp|Q02921|NO93_SOYBN(Early nodulin-93 OS=Glycine max OX=3847 PE=2 SV=1)	PF03386(ENOD93:Early nodulin 93 ENOD93 protein)
TRINITY_DN4094_c2_g1	Cluster 4	hypothetical protein MARPO_0014s0012 [Marchantia polymorpha]	2.01497	1.01076	2.51668e-05	0.000759596	yes	up	GO:0005975(biological_process:carbohydrate metabolic process); GO:0016021(cellular_component:integral component of membrane); GO:0050511(molecular_function:undecaprenyldiphospho-muramoylpentapeptide beta-N-acetylglucosaminyltransferase activity); GO:0030259(biological_process:lipid glycosylation)	K02563	murG	map01502(Vancomycin resistance)	COG0707(M:Cell wall/membrane/envelope biogenesis)	COG0707(Cell wall formation. Catalyzes the transfer of a GlcNAc subunit on undecaprenyl-pyrophosphoryl-MurNAc-pentapeptide (lipid intermediate I) to form undecaprenyl-pyrophosphoryl-MurNAc- (pentapeptide)GlcNAc (lipid intermediate II) (By similarity))	sp|Q2S528|MURG_SALRD(UDP-N-acetylglucosamine--N-acetylmuramyl-(pentapeptide) pyrophosphoryl-undecaprenol N-acetylglucosamine transferase OS=Salinibacter ruber (strain DSM 13855 / M31) OX=309807 GN=murG PE=3 SV=1)	PF04101(Glyco_tran_28_C:Glycosyltransferase family 28 C-terminal domain); PF03033(Glyco_transf_28:Glycosyltransferase family 28 N-terminal domain)
TRINITY_DN11588_c0_g1	Cluster 4	PIN-like protein, partial [Anemia tomentosa]	3.11857	1.64088	2.98894e-05	0.00087594	yes	up	GO:0016021(cellular_component:integral component of membrane); GO:0055085(biological_process:transmembrane transport); GO:0009734(biological_process:auxin-activated signaling pathway)	K13947	PIN		ENOG410YAJ0(U:Intracellular trafficking, secretion, and vesicular transport)	ENOG410YAJ0(auxin Efflux)	sp|Q9LU77|PIN2_ARATH(Auxin efflux carrier component 2 OS=Arabidopsis thaliana OX=3702 GN=PIN2 PE=1 SV=2)	PF03547(Mem_trans:Membrane transport protein)
TRINITY_DN9903_c0_g1	Cluster 4	ubiquinol oxidase 2, mitochondrial [Selaginella moellendorffii]	2.0128	1.00921	3.02109e-05	0.0008828	yes	up	GO:0070469(cellular_component:respiratory chain); GO:0016021(cellular_component:integral component of membrane); GO:0046872(molecular_function:metal ion binding); GO:0009916(molecular_function:alternative oxidase activity); GO:0102721(molecular_function:ubiquinol:oxygen oxidoreductase activity)	K17893	AOX1, AOX2		ENOG410YFEH(S:Function unknown)	ENOG410YFEH(alternative oxidase)	sp|Q40294|AOX1_MANIN(Ubiquinol oxidase, mitochondrial OS=Mangifera indica OX=29780 GN=AOMI 1 PE=1 SV=2)	PF01786(AOX:Alternative oxidase); PF03232(COQ7:Ubiquinone biosynthesis protein COQ7)
TRINITY_DN64356_c0_g1	Cluster 4		13.3013	3.7335	3.84492e-05	0.00108413	yes	up
TRINITY_DN10185_c0_g1	Cluster 4		2.01325	1.00953	3.9901e-05	0.00112103	yes	up
TRINITY_DN90927_c0_g1	Cluster 4	40S ribosomal protein S12 [Selaginella moellendorffii]	66.9966	6.06602	4.46874e-05	0.0012392	yes	up	GO:0003735(molecular_function:structural constituent of ribosome); GO:0022627(cellular_component:cytosolic small ribosomal subunit); GO:0006412(biological_process:translation); GO:0005840(cellular_component:ribosome)	K02951	RP-S12e, RPS12	map03010(Ribosome)	COG1358(J:Translation, ribosomal structure and biogenesis)	COG1358(40s ribosomal protein S27)	sp|Q9SMI3|RS12_CYAPA(40S ribosomal protein S12 OS=Cyanophora paradoxa OX=2762 GN=RPS12 PE=2 SV=1)	PF01248(Ribosomal_L7Ae:Ribosomal protein L7Ae/L30e/S12e/Gadd45 family)
TRINITY_DN8395_c0_g1	Cluster 4		6.87496	2.78135	5.01387e-05	0.00136413	yes	up		K04733	IRAK4
TRINITY_DN28288_c0_g2	Cluster 4		3.40712	1.76855	5.09738e-05	0.00138153	yes	up
TRINITY_DN15654_c1_g1	Cluster 4	hypothetical protein AXG93_399s1040 [Marchantia polymorpha subsp. ruderalis]	2.43534	1.28412	5.8558e-05	0.00155313	yes	up	GO:0022857(molecular_function:transmembrane transporter activity); GO:0015297(molecular_function:antiporter activity); GO:0016020(cellular_component:membrane); GO:0016021(cellular_component:integral component of membrane); GO:0042910(molecular_function:xenobiotic transporter activity)	K03327	TC.MATE, SLC47A, norM, mdtK, dinF		COG0534(V:Defense mechanisms)	COG0534(Mate efflux family protein)	sp|Q9LUH2|DTX19_ARATH(Protein DETOXIFICATION 19 OS=Arabidopsis thaliana OX=3702 GN=DTX19 PE=2 SV=1)	PF01554(MatE:MatE)
TRINITY_DN47683_c0_g2	Cluster 4		29.3286	4.87424	6.1124e-05	0.00160911	yes	up								PF02992(Transposase_21:Transposase family tnp2)
TRINITY_DN10305_c0_g1	Cluster 4	hypothetical protein MARPO_0043s0013 [Marchantia polymorpha]	2.0335	1.02397	6.53642e-05	0.00170171	yes	up	GO:0046872(molecular_function:metal ion binding); GO:0051213(molecular_function:dioxygenase activity); GO:0016491(molecular_function:oxidoreductase activity)	K05933	E1.14.17.4	map00270(Cysteine and methionine metabolism)	COG3491(S:Function unknown)	COG3491(2OGFe(II) oxygenase)	sp|P31237|ACCO_ACTDE(1-aminocyclopropane-1-carboxylate oxidase OS=Actinidia deliciosa OX=3627 GN=ACO PE=2 SV=1)	PF03171(2OG-FeII_Oxy:2OG-Fe(II) oxygenase superfamily); PF14226(DIOX_N:non-haem dioxygenase in morphine synthesis N-terminal)
TRINITY_DN57820_c0_g1	Cluster 4	hypothetical protein MARPO_0052s0012 [Marchantia polymorpha]	2.42219	1.27631	6.69852e-05	0.00173878	yes	up	GO:0005216(molecular_function:ion channel activity); GO:0016021(cellular_component:integral component of membrane); GO:0005249(molecular_function:voltage-gated potassium channel activity)	K05391	CNGC	map04626(Plant-pathogen interaction)	ENOG410XPSE(U:Intracellular trafficking, secretion, and vesicular transport)	ENOG410XPSE(Potassium voltage-gated channel, subfamily H (Eag-related), member)	sp|Q9SJA4|CNG14_ARATH(Probable cyclic nucleotide-gated ion channel 14 OS=Arabidopsis thaliana OX=3702 GN=CNGC14 PE=2 SV=2)	PF00520(Ion_trans:Ion transport protein); PF00027(cNMP_binding:Cyclic nucleotide-binding domain)
TRINITY_DN46387_c0_g1	Cluster 4	uncharacterized protein LOC9649231 isoform X1 [Selaginella moellendorffii]	5.38057	2.42776	7.1567e-05	0.00183613	yes	up	GO:0003824(molecular_function:catalytic activity); GO:0005975(biological_process:carbohydrate metabolic process); GO:0030246(molecular_function:carbohydrate binding)	K18195	RGL4, rhiE		ENOG410YE12(S:Function unknown)	ENOG410YE12(function. Its presence in a non-photosynthetic plant (Epifagus virginiana) and experiments in tobacco indicate that it has an essential function which is probably not related to photosynthesis)		PF14683(CBM-like:Polysaccharide lyase family 4, domain III)
TRINITY_DN8371_c0_g1	Cluster 4	probable WRKY transcription factor 14 isoform X2 [Selaginella moellendorffii]	2.21894	1.14987	7.43158e-05	0.00189303	yes	up	GO:0003700(molecular_function:transcription factor activity, sequence-specific DNA binding); GO:0043565(molecular_function:sequence-specific DNA binding); GO:0005634(cellular_component:nucleus)				ENOG410YK4F(K:Transcription)	ENOG410YK4F(WRKY transcription factor)	sp|Q9LP56|WRK65_ARATH(Probable WRKY transcription factor 65 OS=Arabidopsis thaliana OX=3702 GN=WRKY65 PE=2 SV=1)	PF03106(WRKY:WRKY DNA -binding domain)
TRINITY_DN406_c0_g1	Cluster 4	thaumatin-like protein isoform X1 [Physcomitrella patens]	4.88741	2.28907	7.43205e-05	0.00189303	yes	up					ENOG410YD4X(S:Function unknown); ENOG41105QU(S:Function unknown)	ENOG410YD4X(KDEL (Lys-Asp-Glu-Leu) containing); ENOG41105QU(THN)	sp|P50702|OS81_SOLCO(Osmotin-like protein OSML81 OS=Solanum commersonii OX=4109 PE=2 SV=1)	PF00314(Thaumatin:Thaumatin family)
TRINITY_DN25937_c0_g2	Cluster 4		3.19082	1.67393	7.5541e-05	0.00191766	yes	up
TRINITY_DN16120_c0_g1	Cluster 4		3.22762	1.69047	7.99651e-05	0.00201142	yes	up					ENOG410YEIX(S:Function unknown)	ENOG410YEIX(F-box LRR-repeat protein)	sp|Q8W104|FBL17_ARATH(F-box/LRR-repeat protein 17 OS=Arabidopsis thaliana OX=3702 GN=FBL17 PE=1 SV=1)	PF00646(F-box:F-box domain); PF12937(F-box-like:F-box-like)
TRINITY_DN21638_c0_g1	Cluster 4		3.5701	1.83596	0.000107625	0.00259009	yes	up					ENOG410YTD2(S:Function unknown)	ENOG410YTD2(-)		PF05553(DUF761:Cotton fibre expressed protein)
TRINITY_DN17918_c0_g1	Cluster 4	probable cellulose synthase A catalytic subunit 5 [UDP-forming] [Selaginella moellendorffii]	2.34166	1.22753	0.000112374	0.00269244	yes	up	GO:0016021(cellular_component:integral component of membrane); GO:0030244(biological_process:cellulose biosynthetic process); GO:0071555(biological_process:cell wall organization); GO:0016760(molecular_function:cellulose synthase (UDP-forming) activity); GO:0005886(cellular_component:plasma membrane); GO:0046872(molecular_function:metal ion binding)				COG1215(M:Cell wall/membrane/envelope biogenesis)	COG1215(Glycosyl transferase, family 2)	sp|Q651X7|CSLE1_ORYSJ(Cellulose synthase-like protein E1 OS=Oryza sativa subsp. japonica OX=39947 GN=CSLE1 PE=2 SV=2)	PF03552(Cellulose_synt:Cellulose synthase); PF13632(Glyco_trans_2_3:Glycosyl transferase family group 2)
TRINITY_DN5500_c0_g1	Cluster 4	cationic peroxidase SPC4 [Selaginella moellendorffii]	4.5076	2.17236	0.000133129	0.00310342	yes	up	GO:0020037(molecular_function:heme binding); GO:0006979(biological_process:response to oxidative stress); GO:0005576(cellular_component:extracellular region); GO:0042744(biological_process:hydrogen peroxide catabolic process); GO:0046872(molecular_function:metal ion binding); GO:0004601(molecular_function:peroxidase activity)	K00430	E1.11.1.7	map00940(Phenylpropanoid biosynthesis)	ENOG410ZMT4(G:Carbohydrate transport and metabolism)	ENOG410ZMT4(peroxidase)	sp|Q96520|PER12_ARATH(Peroxidase 12 OS=Arabidopsis thaliana OX=3702 GN=PER12 PE=1 SV=1)	PF00141(peroxidase:Peroxidase)
TRINITY_DN22396_c0_g2	Cluster 4		2.55408	1.3528	0.000197898	0.00434165	yes	up
TRINITY_DN9210_c0_g1	Cluster 4	hypothetical protein MARPO_1350s0001 [Marchantia polymorpha]	2.18986	1.13084	0.000199225	0.00436215	yes	up	GO:0032502(biological_process:developmental process); GO:0006355(biological_process:regulation of transcription, DNA-templated); GO:0005634(cellular_component:nucleus); GO:0006351(biological_process:transcription, DNA-templated); GO:0005524(molecular_function:ATP binding)				ENOG4111821(K:Transcription)	ENOG4111821(WRC)	sp|Q9FJB8|GRF7_ARATH(Growth-regulating factor 7 OS=Arabidopsis thaliana OX=3702 GN=GRF7 PE=2 SV=1)	PF08879(WRC:WRC); PF08880(QLQ:QLQ)
TRINITY_DN19367_c0_g3	Cluster 4	hypothetical protein PHYPA_018526 [Physcomitrella patens]	2.40816	1.26793	0.00022826	0.00486227	yes	up	GO:0016021(cellular_component:integral component of membrane)				ENOG4111SG9(S:Function unknown); ENOG4111K5V(S:Function unknown); ENOG410YRUW(S:Function unknown); ENOG410XS82(S:Function unknown)	ENOG4111SG9(Reverse transcriptase (RNA-dependent DNA polymerase)); ENOG4111K5V(Reverse transcriptase (RNA-dependent DNA polymerase)); ENOG410YRUW(reverse transcriptase); ENOG410XS82(Retrotransposon protein)	sp|O00370|LORF2_HUMAN(LINE-1 retrotransposable element ORF2 protein OS=Homo sapiens OX=9606 PE=1 SV=1)	PF00078(RVT_1:Reverse transcriptase (RNA-dependent DNA polymerase))
TRINITY_DN22559_c0_g1	Cluster 4		2.05734	1.04078	0.000322613	0.00645563	yes	up
TRINITY_DN6648_c0_g2	Cluster 4	protein NRT1/ PTR FAMILY 3.1 [Selaginella moellendorffii]	3.46074	1.79108	0.000347123	0.00685678	yes	up	GO:0006857(biological_process:oligopeptide transport); GO:0022857(molecular_function:transmembrane transporter activity); GO:0016021(cellular_component:integral component of membrane)	K14638	SLC15A3_4, PHT				sp|Q9M175|PTR39_ARATH(Protein NRT1/ PTR FAMILY 2.3 OS=Arabidopsis thaliana OX=3702 GN=NPF2.3 PE=2 SV=1)	PF00854(PTR2:POT family); PF07690(MFS_1:Major Facilitator Superfamily)
TRINITY_DN30538_c0_g1	Cluster 4	obtusifolial 14alpha-demethylase [Selaginella moellendorffii]	2.20696	1.14206	0.000349611	0.00689628	yes	up	GO:0004497(molecular_function:monooxygenase activity); GO:0016125(biological_process:sterol metabolic process); GO:0020037(molecular_function:heme binding); GO:0016021(cellular_component:integral component of membrane); GO:0016705(molecular_function:oxidoreductase activity, acting on paired donors, with incorporation or reduction of molecular oxygen); GO:0008168(molecular_function:methyltransfera…	K05917	CYP51	map00100(Steroid biosynthesis)	COG2124(Q:Secondary metabolites biosynthesis, transport and catabolism)	COG2124(Cytochrome p450)	sp|Q9SAA9|CP511_ARATH(Sterol 14-demethylase OS=Arabidopsis thaliana OX=3702 GN=CYP51G1 PE=1 SV=1)	PF00067(p450:Cytochrome P450)
TRINITY_DN6896_c0_g2	Cluster 4		18.1943	4.18542	0.000370304	0.00722199	yes	up
TRINITY_DN10626_c0_g1	Cluster 4	uncharacterized protein LOC112283951 [Physcomitrella patens]	2.14486	1.10088	0.000398242	0.00767765	yes	up	GO:0009733(biological_process:response to auxin)	pxb;K14488	;SAUR	map04075(Plant hormone signal transduction)	ENOG410YUJ0(S:Function unknown)	ENOG410YUJ0(Auxin responsive protein)	sp|Q9SA49|SAU41_ARATH(Auxin-responsive protein SAUR41 OS=Arabidopsis thaliana OX=3702 GN=SAUR41 PE=2 SV=1)	PF02519(Auxin_inducible:Auxin responsive protein)
TRINITY_DN70439_c0_g4	Cluster 4	hypothetical protein PHYPA_027525 [Physcomitrella patens]	3.6016	1.84864	0.000414045	0.00791509	yes	up	GO:0015074(biological_process:DNA integration); GO:0003676(molecular_function:nucleic acid binding)	K01528	DNM1_3	map04144(Endocytosis)			sp|Q94HW2|POLR1_ARATH(Retrovirus-related Pol polyprotein from transposon RE1 OS=Arabidopsis thaliana OX=3702 GN=RE1 PE=2 SV=1)	PF07727(RVT_2:Reverse transcriptase (RNA-dependent DNA polymerase))
TRINITY_DN21920_c0_g1	Cluster 4	cationic peroxidase SPC4 [Selaginella moellendorffii]	2.35805	1.2376	0.000414143	0.00791509	yes	up	GO:0020037(molecular_function:heme binding); GO:0006979(biological_process:response to oxidative stress); GO:0005576(cellular_component:extracellular region); GO:0042744(biological_process:hydrogen peroxide catabolic process); GO:0046872(molecular_function:metal ion binding); GO:0004601(molecular_function:peroxidase activity)	K00430	E1.11.1.7	map00940(Phenylpropanoid biosynthesis)	ENOG410ZMT4(V:Defense mechanisms)	ENOG410ZMT4((ABC) transporter)	sp|Q96520|PER12_ARATH(Peroxidase 12 OS=Arabidopsis thaliana OX=3702 GN=PER12 PE=1 SV=1)	PF00141(peroxidase:Peroxidase)
TRINITY_DN51347_c0_g1	Cluster 4	hypothetical protein MARPO_0058s0008 [Marchantia polymorpha]	2.51257	1.32916	0.000435953	0.008256	yes	up	GO:0016021(cellular_component:integral component of membrane); GO:0005886(cellular_component:plasma membrane); GO:0005524(molecular_function:ATP binding); GO:0004672(molecular_function:protein kinase activity)	K13420	FLS2	map04016(MAPK signaling pathway - plant); map04626(Plant-pathogen interaction)	COG4886(S:Function unknown)	COG4886(leucine Rich Repeat)	sp|Q9FL28|FLS2_ARATH(LRR receptor-like serine/threonine-protein kinase FLS2 OS=Arabidopsis thaliana OX=3702 GN=FLS2 PE=1 SV=1)	PF12799(LRR_4:Leucine Rich repeats (2 copies)); PF13855(LRR_8:Leucine rich repeat); PF08263(LRRNT_2:Leucine rich repeat N-terminal domain)
TRINITY_DN79294_c0_g1	Cluster 4	protein DETOXIFICATION 16-like isoform X1 [Physcomitrella patens]	2.95323	1.5623	0.000480518	0.00892768	yes	up	GO:0022857(molecular_function:transmembrane transporter activity); GO:0015297(molecular_function:antiporter activity); GO:0016020(cellular_component:membrane); GO:0016021(cellular_component:integral component of membrane); GO:0042910(molecular_function:xenobiotic transporter activity)	K03327	TC.MATE, SLC47A, norM, mdtK, dinF		COG0534(K:Transcription)	COG0534(growth regulating factor protein)	sp|Q9LVD9|DTX40_ARATH(Protein DETOXIFICATION 40 OS=Arabidopsis thaliana OX=3702 GN=DTX40 PE=1 SV=1)	PF01554(MatE:MatE)
TRINITY_DN24688_c1_g1	Cluster 4		3.90633	1.96582	0.00053431	0.00976784	yes	up					ENOG410YXD4(S:Function unknown)	ENOG410YXD4(Defensin-like protein)	sp|O65740|DEF2_CAPAN(Defensin J1-2 OS=Capsicum annuum OX=4072 PE=1 SV=1)	PF00304(Gamma-thionin:Gamma-thionin family); PF01097(Defensin_2:Arthropod defensin)
TRINITY_DN53726_c0_g1	Cluster 4	hypothetical protein SELMODRAFT_99818 [Selaginella moellendorffii]	6.39425	2.67677	0.000538617	0.0098415	yes	up		K14487	GH3	map04075(Plant hormone signal transduction)	ENOG410XQH0(S:Function unknown)	ENOG410XQH0(Indole-3-acetic acid-amido synthetase)	sp|O82333|GH31_ARATH(Probable indole-3-acetic acid-amido synthetase GH3.1 OS=Arabidopsis thaliana OX=3702 GN=GH3.1 PE=2 SV=1)	PF03321(GH3:GH3 auxin-responsive promoter)
TRINITY_DN35993_c0_g1	Cluster 4	cytochrome P450 71A1 [Selaginella moellendorffii]	2.65295	1.4076	0.000549074	0.00999381	yes	up	GO:0005506(molecular_function:iron ion binding); GO:0016705(molecular_function:oxidoreductase activity, acting on paired donors, with incorporation or reduction of molecular oxygen); GO:0016021(cellular_component:integral component of membrane); GO:0004497(molecular_function:monooxygenase activity); GO:0020037(molecular_function:heme binding)				COG2124(Q:Secondary metabolites biosynthesis, transport and catabolism)	COG2124(Cytochrome p450)	sp|I3PFJ5|C76AD_BETVU(Cytochrome P450 76AD1 OS=Beta vulgaris OX=161934 GN=CYP76AD1 PE=2 SV=1)	PF00067(p450:Cytochrome P450)
TRINITY_DN44093_c0_g1	Cluster 4		2.8427	1.50726	0.000587964	0.0106006	yes	up
TRINITY_DN25289_c0_g1	Cluster 4		4.74507	2.24643	0.000673576	0.0118863	yes	up		K02563	murG	map01502(Vancomycin resistance)
TRINITY_DN24283_c1_g1	Cluster 4		7.41652	2.89074	0.000681636	0.0120016	yes	up							sp|Q9SBK8|THN_BRARP(Thionin OS=Brassica rapa subsp. pekinensis OX=51351 GN=THI2 PE=2 SV=1)	PF00321(Thionin:Plant thionin)
TRINITY_DN13035_c0_g1	Cluster 4	chloroplast-localized small heat shock protein [Funaria hygrometrica]	2.52961	1.33891	0.000708739	0.0123718	yes	up		K13993	HSP20	map04141(Protein processing in endoplasmic reticulum)	COG0071(O:Posttranslational modification, protein turnover, chaperones)	COG0071(response to heat)	sp|Q9SSQ8|HS26M_ARATH(26.5 kDa heat shock protein, mitochondrial OS=Arabidopsis thaliana OX=3702 GN=HSP26.5 PE=2 SV=1)	PF00011(HSP20:Hsp20/alpha crystallin family); PF17886(ArsA_HSP20:HSP20-like domain found in ArsA)
TRINITY_DN11815_c0_g3	Cluster 4		6.11448	2.61223	0.000781341	0.0133643	yes	up
TRINITY_DN15002_c0_g2	Cluster 4	serine/threonine-protein kinase HT1 [Selaginella moellendorffii]	2.22957	1.15677	0.000787394	0.0134351	yes	up	GO:0005524(molecular_function:ATP binding); GO:0004672(molecular_function:protein kinase activity)				COG0515(T:Signal transduction mechanisms)	COG0515(Serine Threonine protein kinase)	sp|Q2MHE4|HT1_ARATH(Serine/threonine/tyrosine-protein kinase HT1 OS=Arabidopsis thaliana OX=3702 GN=HT1 PE=1 SV=1)	PF07714(PK_Tyr_Ser-Thr:Protein tyrosine and serine/threonine kinase); PF00069(Pkinase:Protein kinase domain); PF17667(Pkinase_fungal:Fungal protein kinase); PF14531(Kinase-like:Kinase-like)
TRINITY_DN20327_c0_g1	Cluster 4	cationic amino acid transporter 6, chloroplastic [Selaginella moellendorffii]	2.27548	1.18617	0.000799652	0.0136016	yes	up	GO:0051938(biological_process:L-glutamate import); GO:0015189(molecular_function:L-lysine transmembrane transporter activity); GO:0022857(molecular_function:transmembrane transporter activity); GO:0005313(molecular_function:L-glutamate transmembrane transporter activity); GO:0016021(cellular_component:integral component of membrane)				COG0531(E:Amino acid transport and metabolism)	COG0531(amino acid)	sp|Q9SQZ0|CAAT7_ARATH(Cationic amino acid transporter 7, chloroplastic OS=Arabidopsis thaliana OX=3702 GN=CAT7 PE=3 SV=1)	PF13520(AA_permease_2:Amino acid permease); PF00324(AA_permease:Amino acid permease); PF13906(AA_permease_C:C-terminus of AA_permease)
TRINITY_DN11994_c0_g1	Cluster 4		2.12871	1.08998	0.000827718	0.013978	yes	up
TRINITY_DN38788_c0_g1	Cluster 4		2.47997	1.31032	0.00091021	0.0151182	yes	up
TRINITY_DN23438_c0_g1	Cluster 4		40.8343	5.35171	0.000938069	0.0155116	yes	up
TRINITY_DN13899_c3_g3	Cluster 4		3.45699	1.78951	0.00115434	0.0183327	yes	up
TRINITY_DN31924_c0_g1	Cluster 4		8.62412	3.10838	0.00127802	0.0199106	yes	up
TRINITY_DN44295_c0_g1	Cluster 4	hypothetical protein MARPO_0147s0015 [Marchantia polymorpha]	12.2722	3.61732	0.00128476	0.0199862	yes	up					ENOG4111PC4(S:Function unknown)	ENOG4111PC4(Pfam:Cw-hydrolase)
TRINITY_DN35667_c0_g1	Cluster 4	pectinesterase-like [Selaginella moellendorffii]	2.29071	1.1958	0.0012959	0.0201302	yes	up	GO:0042545(biological_process:cell wall modification); GO:0005618(cellular_component:cell wall); GO:0016021(cellular_component:integral component of membrane); GO:0030599(molecular_function:pectinesterase activity); GO:0005576(cellular_component:extracellular region); GO:0045330(molecular_function:aspartyl esterase activity); GO:0004857(molecular_function:enzyme inhibitor activity); GO:0045490(bi…				COG4677(U:Intracellular trafficking, secretion, and vesicular transport)	COG4677(negative regulation of translational elongation)	sp|Q7Y201|PME13_ARATH(Probable pectinesterase/pectinesterase inhibitor 13 OS=Arabidopsis thaliana OX=3702 GN=PME13 PE=2 SV=2)	PF01095(Pectinesterase:Pectinesterase); PF04043(PMEI:Plant invertase/pectin methylesterase inhibitor)
TRINITY_DN19341_c0_g1	Cluster 4	pectinesterase [Selaginella moellendorffii]	2.56203	1.35729	0.00129754	0.0201388	yes	up	GO:0042545(biological_process:cell wall modification); GO:0005618(cellular_component:cell wall); GO:0016021(cellular_component:integral component of membrane); GO:0030599(molecular_function:pectinesterase activity); GO:0005576(cellular_component:extracellular region); GO:0045330(molecular_function:aspartyl esterase activity); GO:0004857(molecular_function:enzyme inhibitor activity); GO:0045490(bi…	K01051	E3.1.1.11	map00040(Pentose and glucuronate interconversions)	COG4677(S:Function unknown)	COG4677(-)	sp|Q9STY3|PME33_ARATH(Probable pectinesterase/pectinesterase inhibitor 33 OS=Arabidopsis thaliana OX=3702 GN=PME33 PE=2 SV=1)	PF01095(Pectinesterase:Pectinesterase); PF04043(PMEI:Plant invertase/pectin methylesterase inhibitor)
TRINITY_DN16090_c0_g1	Cluster 4	long-chain-alcohol oxidase FAO4A-like [Physcomitrella patens]	2.11688	1.08194	0.00145175	0.0220121	yes	up	GO:0046577(molecular_function:long-chain-alcohol oxidase activity); GO:0016020(cellular_component:membrane); GO:0016021(cellular_component:integral component of membrane); GO:0050660(molecular_function:flavin adenine dinucleotide binding)	K17756	FAO3		COG2303(P:Inorganic ion transport and metabolism)	COG2303(molybdate ion transmembrane transporter activity)	sp|O65709|FAO4A_ARATH(Long-chain-alcohol oxidase FAO4A OS=Arabidopsis thaliana OX=3702 GN=FAO4A PE=3 SV=2)	PF00732(GMC_oxred_N:GMC oxidoreductase); PF05199(GMC_oxred_C:GMC oxidoreductase)
TRINITY_DN53045_c0_g1	Cluster 4	hypothetical protein MARPO_0078s0013 [Marchantia polymorpha]	38.6481	5.27232	0.00145758	0.0220626	yes	up	GO:0030896(cellular_component:checkpoint clamp complex); GO:0004648(molecular_function:O-phospho-L-serine:2-oxoglutarate aminotransferase activity); GO:0006564(biological_process:L-serine biosynthetic process); GO:0000077(biological_process:DNA damage checkpoint); GO:0022625(cellular_component:cytosolic large ribosomal subunit); GO:0003735(molecular_function:structural constituent of ribosome); G…	K02900	RP-L27Ae, RPL27A	map03010(Ribosome)	COG0200(S:Function unknown)	COG0200(Retrotransposon protein)	sp|P48160|RL27A_DICDI(60S ribosomal protein L27a OS=Dictyostelium discoideum OX=44689 GN=rpl27a PE=3 SV=1)	PF00828(Ribosomal_L27A:Ribosomal proteins 50S-L15, 50S-L18e, 60S-L27A)
TRINITY_DN37576_c0_g5	Cluster 4		38.6481	5.27232	0.00145758	0.0220626	yes	up
TRINITY_DN8464_c0_g1	Cluster 4		2.11305	1.07933	0.00156467	0.0233238	yes	up
TRINITY_DN46931_c0_g1	Cluster 4	shikimate O-hydroxycinnamoyltransferase [Selaginella moellendorffii]	4.54966	2.18576	0.00162599	0.0240286	yes	up	GO:0047172(molecular_function:shikimate O-hydroxycinnamoyltransferase activity); GO:0016747(molecular_function:transferase activity, transferring acyl groups other than amino-acyl groups)				ENOG410YCVD(S:Function unknown)	ENOG410YCVD(Transferase family)	sp|Q9LIS1|CR26L_ARATH(Protein ECERIFERUM 26-like OS=Arabidopsis thaliana OX=3702 GN=CER26L PE=2 SV=1)	PF02458(Transferase:Transferase family)
TRINITY_DN26194_c0_g4	Cluster 4	hypothetical protein AXG93_1520s1200 [Marchantia polymorpha subsp. ruderalis]	4.73861	2.24446	0.0017144	0.0249916	yes	up	GO:0005737(cellular_component:cytoplasm); GO:0031625(molecular_function:ubiquitin protein ligase binding); GO:0005840(cellular_component:ribosome); GO:0005634(cellular_component:nucleus); GO:0019941(biological_process:modification-dependent protein catabolic process); GO:0003735(molecular_function:structural constituent of ribosome); GO:0016567(biological_process:protein ubiquitination); GO:00313…	K08770;K02927	UBC;RP-L40e, RPL40	map03010(Ribosome)	COG1552(S:Function unknown)	COG1552(-)	sp|P59271|R27AA_ARATH(Ubiquitin-40S ribosomal protein S27a-1 OS=Arabidopsis thaliana OX=3702 GN=RPS27AA PE=2 SV=2)	PF00240(ubiquitin:Ubiquitin family)
TRINITY_DN5101_c2_g1	Cluster 4		2.80647	1.48876	0.00181239	0.0260986	yes	up
TRINITY_DN52844_c0_g1	Cluster 4		5.26149	2.39547	0.00184277	0.0264107	yes	up
TRINITY_DN45171_c0_g2	Cluster 4		3.16235	1.661	0.0019153	0.0272403	yes	up								PF03478(DUF295:Protein of unknown function (DUF295))
TRINITY_DN6320_c1_g2	Cluster 4	hypothetical protein AXG93_1333s1150 [Marchantia polymorpha subsp. ruderalis]	2.18761	1.12935	0.00193448	0.0274854	yes	up	GO:0006564(biological_process:L-serine biosynthetic process); GO:0016616(molecular_function:oxidoreductase activity, acting on the CH-OH group of donors, NAD or NADP as acceptor); GO:0051287(molecular_function:NAD binding); GO:0006520(biological_process:cellular amino acid metabolic process); GO:0004617(molecular_function:phosphoglycerate dehydrogenase activity); GO:0055114(biological_process:oxi…	K00058	serA, PHGDH	map00270(Cysteine and methionine metabolism); map00260(Glycine, serine and threonine metabolism)	COG0111(E:Amino acid transport and metabolism)	COG0111(Dehydrogenase)	sp|O49485|SERA1_ARATH(D-3-phosphoglycerate dehydrogenase 1, chloroplastic OS=Arabidopsis thaliana OX=3702 GN=PGDH1 PE=1 SV=1)
TRINITY_DN23694_c0_g1	Cluster 4	F-box/kelch-repeat protein At5g15710 isoform X1 [Selaginella moellendorffii]	2.55444	1.353	0.00208312	0.0290366	yes	up	GO:0004842(molecular_function:ubiquitin-protein transferase activity); GO:0031146(biological_process:SCF-dependent proteasomal ubiquitin-dependent protein catabolic process)				ENOG4111NU8(S:Function unknown)	ENOG4111NU8(-)	sp|Q9FII2|FK117_ARATH(F-box/kelch-repeat protein At5g42350 OS=Arabidopsis thaliana OX=3702 GN=At5g42350 PE=2 SV=1)	PF12937(F-box-like:F-box-like); PF01344(Kelch_1:Kelch motif); PF00646(F-box:F-box domain)
TRINITY_DN16192_c0_g1	Cluster 4	L-ascorbate peroxidase 3 [Selaginella moellendorffii]	2.73618	1.45216	0.00223405	0.0307223	yes	up	GO:0016021(cellular_component:integral component of membrane); GO:0004601(molecular_function:peroxidase activity); GO:0020037(molecular_function:heme binding); GO:0006979(biological_process:response to oxidative stress)	K00434	E1.11.1.11	map00480(Glutathione metabolism); map00053(Ascorbate and aldarate metabolism)	COG0376(P:Inorganic ion transport and metabolism)	COG0376(Bifunctional enzyme with both catalase and broad- spectrum peroxidase activity (By similarity))	sp|Q0JEQ2|APX3_ORYSJ(Probable L-ascorbate peroxidase 3, peroxisomal OS=Oryza sativa subsp. japonica OX=39947 GN=APX3 PE=2 SV=1)	PF00141(peroxidase:Peroxidase)
TRINITY_DN3122_c0_g3	Cluster 4		2.29196	1.19658	0.00285825	0.0371719	yes	up
TRINITY_DN12257_c1_g2	Cluster 4		3.60798	1.85119	0.00295213	0.0381193	yes	up
TRINITY_DN36129_c0_g1	Cluster 4	putative RING-H2 finger protein ATL12 [Selaginella moellendorffii]	3.88038	1.9562	0.00316091	0.0401359	yes	up	GO:0016567(biological_process:protein ubiquitination); GO:0016021(cellular_component:integral component of membrane); GO:0031625(molecular_function:ubiquitin protein ligase binding)	K19041	RNF38_44		ENOG41121N2(O:Posttranslational modification, protein turnover, chaperones)	ENOG41121N2(zinc ion binding)	sp|Q5EAE9|ATL43_ARATH(RING-H2 finger protein ATL43 OS=Arabidopsis thaliana OX=3702 GN=ATL43 PE=2 SV=2)	PF13639(zf-RING_2:Ring finger domain); PF17123(zf-RING_11:RING-like zinc finger); PF13923(zf-C3HC4_2:Zinc finger, C3HC4 type (RING finger)); PF12678(zf-rbx1:RING-H2 zinc finger domain); PF00097(zf-C3HC4:Zinc finger, C3HC4 type (RING finger)); PF14634(zf-RING_5:zinc-RING finger domain); PF12861(zf-ANAPC11:Anaphase-promoting complex subunit 11 RING-H2 finger); PF13920(zf-C3HC4_3:Zinc finger, C3HC4 …
TRINITY_DN60244_c0_g1	Cluster 4		32.5058	5.02263	0.00362212	0.0446023	yes	up		K08850	AURKX		ENOG410XNRB(T:Signal transduction mechanisms)	ENOG410XNRB(serine threonine-protein kinase)	sp|O64629|AUR3_ARATH(Serine/threonine-protein kinase Aurora-3 OS=Arabidopsis thaliana OX=3702 GN=AUR3 PE=2 SV=1)	PF00069(Pkinase:Protein kinase domain)
TRINITY_DN4540_c0_g3	Cluster 6		13.5308	3.75818	3.28108e-42	6.81856e-39	yes	up
TRINITY_DN76_c2_g2	Cluster 6		2.99314	1.58166	2.29241e-27	1.81994e-24	yes	up					ENOG410ZQIN(S:Function unknown)	ENOG410ZQIN(-)	sp|P08688|ALB2_PEA(Albumin-2 OS=Pisum sativum OX=3888 PE=2 SV=1)	PF00045(Hemopexin:Hemopexin)
TRINITY_DN18023_c0_g1	Cluster 6	protein NRT1/ PTR FAMILY 8.1 isoform X2 [Selaginella moellendorffii]	11.9278	3.57626	6.66108e-25	4.75406e-22	yes	up	GO:0006857(biological_process:oligopeptide transport); GO:0022857(molecular_function:transmembrane transporter activity); GO:0016021(cellular_component:integral component of membrane)	K14638	SLC15A3_4, PHT		COG3104(E:Amino acid transport and metabolism)	COG3104(transporter)	sp|Q9LQL2|PTR14_ARATH(Protein NRT1/ PTR FAMILY 7.3 OS=Arabidopsis thaliana OX=3702 GN=NPF7.3 PE=1 SV=2)	PF00854(PTR2:POT family)
TRINITY_DN7023_c0_g1	Cluster 6	probable protein phosphatase 2C 33 [Selaginella moellendorffii]	3.05339	1.61041	2.49042e-23	1.50398e-20	yes	up	GO:0004724(molecular_function:magnesium-dependent protein serine/threonine phosphatase activity); GO:0004722(molecular_function:protein serine/threonine phosphatase activity)				COG0631(T:Signal transduction mechanisms)	COG0631(Phosphatase)	sp|Q6Z8B9|P2C12_ORYSJ(Probable protein phosphatase 2C 12 OS=Oryza sativa subsp. japonica OX=39947 GN=Os02g0224100 PE=2 SV=1)	PF00481(PP2C:Protein phosphatase 2C); PF13672(PP2C_2:Protein phosphatase 2C)
TRINITY_DN6405_c0_g1	Cluster 6		3.52277	1.81671	4.26636e-22	2.35506e-19	yes	up
TRINITY_DN13899_c0_g1	Cluster 6		5.25576	2.3939	1.51534e-20	7.18588e-18	yes	up
TRINITY_DN8878_c0_g1	Cluster 6	sucrose synthase 2-like [Selaginella moellendorffii]	2.15792	1.10964	1.34029e-19	5.84574e-17	yes	up	GO:0046524(molecular_function:sucrose-phosphate synthase activity); GO:0016157(molecular_function:sucrose synthase activity); GO:0005985(biological_process:sucrose metabolic process)	bvg;K00695	;E2.4.1.13	map00500(Starch and sucrose metabolism)	COG0438(M:Cell wall/membrane/envelope biogenesis)	COG0438(Glycosyl transferase (Group 1)	sp|Q42652|SUS_BETVU(Sucrose synthase (Fragment) OS=Beta vulgaris OX=161934 GN=SS1 PE=2 SV=1)	PF00862(Sucrose_synth:Sucrose synthase); PF00534(Glycos_transf_1:Glycosyl transferases group 1); PF13692(Glyco_trans_1_4:Glycosyl transferases group 1); PF13524(Glyco_trans_1_2:Glycosyl transferases group 1)
TRINITY_DN617_c0_g2	Cluster 6	peroxidase P7 [Selaginella moellendorffii]	4.20502	2.07211	4.37951e-19	1.76825e-16	yes	up	GO:0020037(molecular_function:heme binding); GO:0006979(biological_process:response to oxidative stress); GO:0005576(cellular_component:extracellular region); GO:0042744(biological_process:hydrogen peroxide catabolic process); GO:0046872(molecular_function:metal ion binding); GO:0004601(molecular_function:peroxidase activity)	K00430	E1.11.1.7	map00940(Phenylpropanoid biosynthesis)	ENOG410YA1B(G:Carbohydrate transport and metabolism)	ENOG410YA1B(peroxidase)	sp|Q9FJZ9|PER72_ARATH(Peroxidase 72 OS=Arabidopsis thaliana OX=3702 GN=PER72 PE=1 SV=1)	PF00141(peroxidase:Peroxidase)
TRINITY_DN2899_c0_g1	Cluster 6	cold-responsive protein kinase 1 [Selaginella moellendorffii]	3.00452	1.58713	1.47793e-18	5.64465e-16	yes	up	GO:0016021(cellular_component:integral component of membrane); GO:0004672(molecular_function:protein kinase activity); GO:0004674(molecular_function:protein serine/threonine kinase activity); GO:0005886(cellular_component:plasma membrane); GO:0046777(biological_process:protein autophosphorylation); GO:0005524(molecular_function:ATP binding)	K04733	IRAK4		COG0515(T:Signal transduction mechanisms)	COG0515(Serine Threonine protein kinase)	sp|Q9LDM5|CRK31_ARATH(Putative cysteine-rich receptor-like protein kinase 31 OS=Arabidopsis thaliana OX=3702 GN=CRK31 PE=3 SV=1)	PF00069(Pkinase:Protein kinase domain); PF07714(PK_Tyr_Ser-Thr:Protein tyrosine and serine/threonine kinase); PF01636(APH:Phosphotransferase enzyme family)
TRINITY_DN7282_c0_g1	Cluster 6	transmembrane protein DDB_G0273707/DDB_G0273361 [Selaginella moellendorffii]	2.76686	1.46825	1.24596e-17	4.31549e-15	yes	up	GO:0016021(cellular_component:integral component of membrane)				ENOG4111S0M(S:Function unknown)	ENOG4111S0M(integral membrane HPP family protein)		PF04982(HPP:HPP family)
TRINITY_DN1821_c1_g3	Cluster 6	hypothetical protein MARPO_0029s0092 [Marchantia polymorpha]	2.31691	1.2122	1.35439e-17	4.6455e-15	yes	up	GO:0006561(biological_process:proline biosynthetic process); GO:0005618(cellular_component:cell wall); GO:0004735(molecular_function:pyrroline-5-carboxylate reductase activity); GO:0009651(biological_process:response to salt stress); GO:0009408(biological_process:response to heat); GO:0055129(biological_process:L-proline biosynthetic process)	K00286	proC	map00330(Arginine and proline metabolism)	COG0345(E:Amino acid transport and metabolism)	COG0345(pyrroline-5-carboxylate reductase activity)	sp|O04016|P5CR_ACTCC(Pyrroline-5-carboxylate reductase OS=Actinidia chinensis var. chinensis OX=1590841 GN=CEY00_Acc23110 PE=2 SV=2)	PF03807(F420_oxidored:NADP oxidoreductase coenzyme F420-dependent); PF14748(P5CR_dimer:Pyrroline-5-carboxylate reductase dimerisation); PF03446(NAD_binding_2:NAD binding domain of 6-phosphogluconate dehydrogenase)
TRINITY_DN76_c0_g1	Cluster 6	calumenin-A-like isoform X4 [Physcomitrella patens]	2.34102	1.22714	2.06821e-17	7.02565e-15	yes	up	GO:0016021(cellular_component:integral component of membrane); GO:0005509(molecular_function:calcium ion binding); GO:0005783(cellular_component:endoplasmic reticulum)				ENOG410XRVE(S:Function unknown)	ENOG410XRVE(EF-hand calcium binding domain)	sp|Q14257|RCN2_HUMAN(Reticulocalbin-2 OS=Homo sapiens OX=9606 GN=RCN2 PE=1 SV=1)	PF13499(EF-hand_7:EF-hand domain pair); PF00036(EF-hand_1:EF hand); PF13202(EF-hand_5:EF hand); PF13405(EF-hand_6:EF-hand domain); PF13833(EF-hand_8:EF-hand domain pair); PF10591(SPARC_Ca_bdg:Secreted protein acidic and rich in cysteine Ca binding region)
TRINITY_DN24562_c0_g1	Cluster 6	hemoglobin [Ceratodon purpureus]	9.16044	3.19542	5.84224e-17	1.87634e-14	yes	up	GO:0005344(molecular_function:oxygen transporter activity); GO:0046872(molecular_function:metal ion binding); GO:0019825(molecular_function:oxygen binding); GO:0020037(molecular_function:heme binding)	K21894	CYGB		COG1018(C:Energy production and conversion)	COG1018(Is involved in NO detoxification in an aerobic process, termed nitric oxide dioxygenase (NOD) reaction that utilizes O(2) and NAD(P)H to convert NO to nitrate, which protects the bacterium from various noxious nitrogen compounds. Therefore, plays a central role in the inducible response to nitrosative stress (By similarity))	sp|Q9FVL0|HBL1_MEDSA(Non-symbiotic hemoglobin 1 OS=Medicago sativa OX=3879 GN=MHB1 PE=2 SV=1)	PF00042(Globin:Globin)
TRINITY_DN179_c0_g1	Cluster 6	hypothetical protein SELMODRAFT_87670 [Selaginella moellendorffii]	2.1264	1.08841	7.29403e-17	2.3215e-14	yes	up	GO:0005737(cellular_component:cytoplasm); GO:0046872(molecular_function:metal ion binding); GO:0019243(biological_process:methylglyoxal catabolic process to D-lactate via S-lactoyl-glutathione); GO:0004462(molecular_function:lactoylglutathione lyase activity)	K01759	GLO1, gloA	map00620(Pyruvate metabolism)	COG0346(E:Amino acid transport and metabolism)	COG0346(glyoxalase bleomycin resistance protein dioxygenase)	sp|O65398|GLX1_ARATH(Lactoylglutathione lyase GLX1 OS=Arabidopsis thaliana OX=3702 GN=GLX1 PE=1 SV=1)	PF00903(Glyoxalase:Glyoxalase/Bleomycin resistance protein/Dioxygenase superfamily); PF13669(Glyoxalase_4:Glyoxalase/Bleomycin resistance protein/Dioxygenase superfamily); PF18029(Glyoxalase_6:Glyoxalase-like domain)
TRINITY_DN5933_c0_g1	Cluster 6	ferredoxin--nitrite reductase, chloroplastic [Selaginella moellendorffii]	2.36581	1.24234	3.26548e-16	9.45611e-14	yes	up	GO:0009941(cellular_component:chloroplast envelope); GO:0010167(biological_process:response to nitrate); GO:0051539(molecular_function:4 iron, 4 sulfur cluster binding); GO:0020037(molecular_function:heme binding); GO:0009570(cellular_component:chloroplast stroma); GO:0051536(molecular_function:iron-sulfur cluster binding); GO:0005739(cellular_component:mitochondrion); GO:0048046(cellular_compone…	K00366	nirA	map00910(Nitrogen metabolism)	COG0155(C:Energy production and conversion)	COG0155(Component of the sulfite reductase complex that catalyzes the 6-electron reduction of sulfite to sulfide. This is one of several activities required for the biosynthesis of L- cysteine from sulfate (By similarity))	sp|P05314|NIR_SPIOL(Ferredoxin--nitrite reductase, chloroplastic OS=Spinacia oleracea OX=3562 GN=NIR PE=1 SV=1)	PF01077(NIR_SIR:Nitrite and sulphite reductase 4Fe-4S domain); PF03460(NIR_SIR_ferr:Nitrite/Sulfite reductase ferredoxin-like half domain)
TRINITY_DN12299_c0_g1	Cluster 6		4.49132	2.16714	7.58782e-16	2.12751e-13	yes	up
TRINITY_DN15474_c0_g1	Cluster 6	uncharacterized protein LOC112277665 [Physcomitrella patens]	10.7137	3.42138	1.33838e-14	3.19479e-12	yes	up	GO:0016021(cellular_component:integral component of membrane); GO:0009506(cellular_component:plasmodesma); GO:0005886(cellular_component:plasma membrane)				ENOG410YVJ0(S:Function unknown)	ENOG410YVJ0(B12D protein)		PF06522(B12D:NADH-ubiquinone reductase complex 1 MLRQ subunit)
TRINITY_DN6120_c0_g2	Cluster 6	vesicle-associated membrane protein 721 [Selaginella moellendorffii]	5.16329	2.36829	2.20349e-14	5.12144e-12	yes	up	GO:0016021(cellular_component:integral component of membrane); GO:0016192(biological_process:vesicle-mediated transport)	K08511	ATVAMP72		COG5143(U:Intracellular trafficking, secretion, and vesicular transport)	COG5143(Vesicle-associated membrane protein)	sp|O48850|VA725_ARATH(Vesicle-associated membrane protein 725 OS=Arabidopsis thaliana OX=3702 GN=VAMP725 PE=2 SV=2)
TRINITY_DN11435_c0_g1	Cluster 6	hypothetical protein AXG93_1660s1370 [Marchantia polymorpha subsp. ruderalis]	2.01893	1.01359	5.77355e-14	1.26298e-11	yes	up	GO:0006541(biological_process:glutamine metabolic process)	K22314	GGP		COG0518(F:Nucleotide transport and metabolism)	COG0518(Catalyzes the synthesis of GMP from XMP (By similarity))	sp|O82225|GGP5_ARATH(Gamma-glutamyl peptidase 5 OS=Arabidopsis thaliana OX=3702 GN=GGP5 PE=2 SV=1)	PF00117(GATase:Glutamine amidotransferase class-I)
TRINITY_DN14390_c0_g1	Cluster 6	beta-glucosidase 6 isoform X2 [Selaginella moellendorffii]	2.55439	1.35298	1.02744e-13	2.14781e-11	yes	up	GO:0005975(biological_process:carbohydrate metabolic process); GO:0004553(molecular_function:hydrolase activity, hydrolyzing O-glycosyl compounds)	K01188	E3.2.1.21	map00460(Cyanoamino acid metabolism); map00940(Phenylpropanoid biosynthesis); map00500(Starch and sucrose metabolism)	COG2723(G:Carbohydrate transport and metabolism)	COG2723(beta-glucosidase)	sp|B3H5Q1|BGL11_ARATH(Beta-glucosidase 11 OS=Arabidopsis thaliana OX=3702 GN=BGLU11 PE=2 SV=2)	PF00232(Glyco_hydro_1:Glycosyl hydrolase family 1)
TRINITY_DN92008_c0_g1	Cluster 6	BURP domain-containing protein BNM2A-like [Physcomitrella patens]	10.5096	3.39364	1.211e-13	2.51663e-11	yes	up					ENOG411184D(S:Function unknown); ENOG410YDUK(S:Function unknown)	ENOG411184D(BURP domain); ENOG410YDUK(BURP domain)	sp|Q08298|RD22_ARATH(BURP domain protein RD22 OS=Arabidopsis thaliana OX=3702 GN=RD22 PE=2 SV=1)	PF03181(BURP:BURP domain)
TRINITY_DN5901_c0_g1	Cluster 6	hypothetical protein AXG93_4461s1500 [Marchantia polymorpha subsp. ruderalis]	2.81181	1.4915	3.8747e-13	7.32018e-11	yes	up	GO:0005548(molecular_function:phospholipid transporter activity); GO:0003676(molecular_function:nucleic acid binding)				COG5083(S:Function unknown)	COG5083(phosphatidylinositol transfer protein)	sp|Q9NCL8|PITP1_DICDI(Phosphatidylinositol transfer protein 1 OS=Dictyostelium discoideum OX=44689 GN=pitA PE=1 SV=1)	PF02121(IP_trans:Phosphatidylinositol transfer protein)
TRINITY_DN512_c1_g2	Cluster 6	cationic peroxidase SPC4 [Selaginella moellendorffii]	2.06445	1.04576	5.45059e-13	1.00032e-10	yes	up	GO:0020037(molecular_function:heme binding); GO:0006979(biological_process:response to oxidative stress); GO:0005576(cellular_component:extracellular region); GO:0042744(biological_process:hydrogen peroxide catabolic process); GO:0046872(molecular_function:metal ion binding); GO:0004601(molecular_function:peroxidase activity)	K00430	E1.11.1.7	map00940(Phenylpropanoid biosynthesis)	ENOG410ZMT4(G:Carbohydrate transport and metabolism)	ENOG410ZMT4(peroxidase)	sp|Q96520|PER12_ARATH(Peroxidase 12 OS=Arabidopsis thaliana OX=3702 GN=PER12 PE=1 SV=1)	PF00141(peroxidase:Peroxidase)
TRINITY_DN22002_c0_g1	Cluster 6	thiamine phosphate phosphatase-like protein isoform X1 [Physcomitrella patens]	2.88905	1.5306	7.05513e-13	1.26521e-10	yes	up	GO:0046872(molecular_function:metal ion binding); GO:0016791(molecular_function:phosphatase activity)	K13248	PHOSPHO2	map00750(Vitamin B6 metabolism)			sp|Q67YC0|PPSP1_ARATH(Inorganic pyrophosphatase 1 OS=Arabidopsis thaliana OX=3702 GN=PS2 PE=1 SV=1)	PF06888(Put_Phosphatase:Putative Phosphatase); PF12710(HAD:haloacid dehalogenase-like hydrolase)
TRINITY_DN22744_c0_g1	Cluster 6	hypothetical protein SELMODRAFT_112786 [Selaginella moellendorffii]	8.43898	3.07707	8.4885e-13	1.49943e-10	yes	up	GO:0046872(molecular_function:metal ion binding); GO:0051213(molecular_function:dioxygenase activity); GO:0016491(molecular_function:oxidoreductase activity)				COG3491(S:Function unknown)	COG3491(2OGFe(II) oxygenase)	sp|Q945B6|AOP1L_ARATH(Probable 2-oxoglutarate-dependent dioxygenase AOP1.2 OS=Arabidopsis thaliana OX=3702 GN=AOP1.2 PE=2 SV=1)	PF03171(2OG-FeII_Oxy:2OG-Fe(II) oxygenase superfamily); PF14226(DIOX_N:non-haem dioxygenase in morphine synthesis N-terminal)
TRINITY_DN12949_c0_g1	Cluster 6		16.4881	4.04336	9.2662e-13	1.61931e-10	yes	up
TRINITY_DN6437_c0_g1	Cluster 6		564.576	9.14102	1.00814e-12	1.75449e-10	yes	up
TRINITY_DN8664_c0_g1	Cluster 6	protein DETOXIFICATION 42-like [Physcomitrella patens]	2.22313	1.15259	1.02117e-12	1.7728e-10	yes	up	GO:0015297(molecular_function:antiporter activity); GO:0016021(cellular_component:integral component of membrane); GO:0042910(molecular_function:xenobiotic transporter activity)				COG0534(V:Defense mechanisms)	COG0534(Mate efflux family protein)	sp|Q9SYD6|DTX42_ARATH(Protein DETOXIFICATION 42 OS=Arabidopsis thaliana OX=3702 GN=DTX42 PE=2 SV=2)	PF01554(MatE:MatE); PF14667(Polysacc_synt_C:Polysaccharide biosynthesis C-terminal domain)
TRINITY_DN2762_c0_g1	Cluster 6	magnesium-chelatase subunit ChlH, chloroplastic isoform X1 [Selaginella moellendorffii]	3.5983	1.84731	1.04868e-12	1.8161e-10	yes	up	GO:0009058(biological_process:biosynthetic process); GO:0015995(biological_process:chlorophyll biosynthetic process); GO:0005739(cellular_component:mitochondrion); GO:0009507(cellular_component:chloroplast); GO:0016851(molecular_function:magnesium chelatase activity)	K03403	chlH, bchH	map00860(Porphyrin and chlorophyll metabolism)	COG1429(H:Coenzyme transport and metabolism)	COG1429(cobaltochelatase, cobn subunit)	sp|Q9FNB0|CHLH_ARATH(Magnesium-chelatase subunit ChlH, chloroplastic OS=Arabidopsis thaliana OX=3702 GN=CHLH PE=1 SV=1)	PF02514(CobN-Mg_chel:CobN/Magnesium Chelatase); PF11965(DUF3479:Domain of unknown function (DUF3479))
TRINITY_DN33163_c0_g1	Cluster 6	elongation factor 1-alpha [Selaginella moellendorffii]	59.4842	5.89443	1.21169e-12	2.07299e-10	yes	up	GO:0003746(molecular_function:translation elongation factor activity); GO:0003924(molecular_function:GTPase activity); GO:0005525(molecular_function:GTP binding)	K03231	EEF1A	map03013(RNA transport)	COG5256(J:Translation, ribosomal structure and biogenesis)	COG5256(This protein promotes the GTP-dependent binding of aminoacyl-tRNA to the A-site of ribosomes during protein biosynthesis (By similarity))	sp|P17786|EF1A_SOLLC(Elongation factor 1-alpha OS=Solanum lycopersicum OX=4081 PE=2 SV=1)	PF00009(GTP_EFTU:Elongation factor Tu GTP binding domain); PF03143(GTP_EFTU_D3:Elongation factor Tu C-terminal domain); PF03144(GTP_EFTU_D2:Elongation factor Tu domain 2); PF01926(MMR_HSR1:50S ribosome-binding GTPase)
TRINITY_DN8861_c0_g1	Cluster 6	hypothetical protein MARPO_0005s0025 [Marchantia polymorpha]	13.5376	3.7589	1.75594e-12	2.91243e-10	yes	up	GO:0016021(cellular_component:integral component of membrane); GO:1903424(biological_process:fluoride transmembrane transport); GO:0005887(cellular_component:integral component of plasma membrane); GO:1903425(molecular_function:fluoride transmembrane transporter activity); GO:0005886(cellular_component:plasma membrane)	K06199	crcB, FEX		ENOG4111HB9(S:Function unknown)	ENOG4111HB9(Camphor resistance CrcB family protein)	sp|A5GAD3|CRCB_GEOUR(Putative fluoride ion transporter CrcB OS=Geobacter uraniireducens (strain Rf4) OX=351605 GN=crcB PE=3 SV=1)	PF02537(CRCB:CrcB-like protein, Camphor Resistance (CrcB))
TRINITY_DN19390_c0_g1	Cluster 6	chloroplast unusual positioning 1A [Adiantum capillus-veneris]	2.34081	1.22701	3.27178e-12	5.08075e-10	yes	up					ENOG410YDCU(S:Function unknown)	ENOG410YDCU(-)	sp|Q9LI74|CHUP1_ARATH(Protein CHUP1, chloroplastic OS=Arabidopsis thaliana OX=3702 GN=CHUP1 PE=1 SV=1)
TRINITY_DN16629_c0_g1	Cluster 6		3.71488	1.89332	4.28844e-12	6.53036e-10	yes	up					ENOG410YJN0(S:Function unknown)	ENOG410YJN0(-)		PF05553(DUF761:Cotton fibre expressed protein)
TRINITY_DN34997_c0_g1	Cluster 6	hypothetical protein AXG93_4170s1000 [Marchantia polymorpha subsp. ruderalis]	14.8051	3.88802	4.91236e-12	7.4007e-10	yes	up	GO:0047763(molecular_function:caffeate O-methyltransferase activity); GO:0046983(molecular_function:protein dimerization activity); GO:0008171(molecular_function:O-methyltransferase activity); GO:0032259(biological_process:methylation)	K16040	ROMT	map00945(Stilbenoid, diarylheptanoid and gingerol biosynthesis)	ENOG410XS7T(S:Function unknown)	ENOG410XS7T(o-methyltransferase)	sp|B0ZB57|OMT3_HUMLU(Probable O-methyltransferase 3 OS=Humulus lupulus OX=3486 GN=OMT3 PE=2 SV=1)	PF00891(Methyltransf_2:O-methyltransferase domain); PF08100(Dimerisation:Dimerisation domain)
TRINITY_DN61473_c0_g1	Cluster 6	hypothetical protein MARPO_0122s0009 [Marchantia polymorpha]	392.786	8.6176	5.83838e-12	8.64827e-10	yes	up	GO:0008234(molecular_function:cysteine-type peptidase activity)	K01365;K01373	CTSL;CTSF	map04145(Phagosome); map04626(Plant-pathogen interaction)	COG4870(O:Posttranslational modification, protein turnover, chaperones)	COG4870(cathepsin)	sp|Q05094|CYSP2_LEIPI(Cysteine proteinase 2 OS=Leishmania pifanoi OX=5682 GN=CYS2 PE=1 SV=1)	PF00112(Peptidase_C1:Papain family cysteine protease); PF08246(Inhibitor_I29:Cathepsin propeptide inhibitor domain (I29)); PF03051(Peptidase_C1_2:Peptidase C1-like family)
TRINITY_DN8869_c0_g2	Cluster 6		7.43514	2.89436	7.17156e-12	1.05347e-09	yes	up
TRINITY_DN48868_c0_g2	Cluster 6	GDSL esterase/lipase 1-like isoform X1 [Physcomitrella patens]	10.7829	3.43067	1.26333e-11	1.79244e-09	yes	up	GO:0016298(molecular_function:lipase activity); GO:0006629(biological_process:lipid metabolic process); GO:0016788(molecular_function:hydrolase activity, acting on ester bonds)				COG3240(S:Function unknown)	COG3240(-)	sp|Q9SSA7|GLIP5_ARATH(GDSL esterase/lipase 5 OS=Arabidopsis thaliana OX=3702 GN=GLIP5 PE=2 SV=2)	PF00657(Lipase_GDSL:GDSL-like Lipase/Acylhydrolase)
TRINITY_DN69519_c0_g2	Cluster 6	calcium-dependent protein kinase 7-like [Physcomitrella patens]	343.028	8.42218	2.26458e-11	3.07708e-09	yes	up	GO:1902584(biological_process:positive regulation of response to water deprivation); GO:0006970(biological_process:response to osmotic stress); GO:0005509(molecular_function:calcium ion binding); GO:0005524(molecular_function:ATP binding); GO:0004672(molecular_function:protein kinase activity)	K13412	CPK	map04626(Plant-pathogen interaction)	ENOG410XRMJ(T:Signal transduction mechanisms)	ENOG410XRMJ(calcium-dependent protein kinase)	sp|Q9SIQ7|CDPKO_ARATH(Calcium-dependent protein kinase 24 OS=Arabidopsis thaliana OX=3702 GN=CPK24 PE=2 SV=1)	PF00069(Pkinase:Protein kinase domain); PF07714(PK_Tyr_Ser-Thr:Protein tyrosine and serine/threonine kinase)
TRINITY_DN2503_c1_g1	Cluster 6		2.29627	1.19929	3.96586e-11	5.1444e-09	yes	up
TRINITY_DN13003_c0_g1	Cluster 6	nicotianamine synthase 2-like [Physcomitrella patens]	2.57123	1.36246	6.82658e-11	8.4179e-09	yes	up		K05953	E2.5.1.43				sp|Q9XGI7|NAS_SOLLC(Nicotianamine synthase OS=Solanum lycopersicum OX=4081 GN=CHLN PE=2 SV=1)	PF03059(NAS:Nicotianamine synthase protein); PF13847(Methyltransf_31:Methyltransferase domain)
TRINITY_DN1854_c0_g1	Cluster 6		2.45516	1.29582	1.21091e-10	1.44771e-08	yes	up
TRINITY_DN41692_c0_g2	Cluster 6	uncharacterized protein LOC112289777 [Physcomitrella patens]	2.37968	1.25077	2.55225e-10	2.88244e-08	yes	up	GO:0005759(cellular_component:mitochondrial matrix); GO:0006457(biological_process:protein folding); GO:0051087(molecular_function:chaperone binding); GO:0000774(molecular_function:adenyl-nucleotide exchange factor activity); GO:0042803(molecular_function:protein homodimerization activity)	K03687	GRPE		COG0576(O:Posttranslational modification, protein turnover, chaperones)	COG0576(Participates actively in the response to hyperosmotic and heat shock by preventing the aggregation of stress-denatured proteins, in association with DnaK and GrpE. It is the nucleotide exchange factor for DnaK and may function as a thermosensor. Unfolded proteins bind initially to DnaJ)	sp|A3PA63|GRPE_PROM0(Protein GrpE OS=Prochlorococcus marinus (strain MIT 9301) OX=167546 GN=grpE PE=3 SV=1)	PF01025(GrpE:GrpE)
TRINITY_DN59056_c0_g2	Cluster 6		55.2841	5.78879	5.93483e-10	6.2124e-08	yes	up							sp|P0C2F6|RNHX1_ARATH(Putative ribonuclease H protein At1g65750 OS=Arabidopsis thaliana OX=3702 GN=At1g65750 PE=3 SV=1)
TRINITY_DN6855_c0_g2	Cluster 6		234.956	7.87624	6.06608e-10	6.3404e-08	yes	up
TRINITY_DN30793_c0_g1	Cluster 6	guard cell S-type anion channel SLAC1-like [Physcomitrella patens]	4.11975	2.04256	9.12339e-10	9.09212e-08	yes	up	GO:0016021(cellular_component:integral component of membrane); GO:0008308(molecular_function:voltage-gated anion channel activity); GO:0006873(biological_process:cellular ion homeostasis); GO:0005623(cellular_component:cell)				ENOG410YDIV(P:Inorganic ion transport and metabolism)	ENOG410YDIV(S-type anion channel SLAH1-like)	sp|Q5E930|SLAH1_ARATH(S-type anion channel SLAH1 OS=Arabidopsis thaliana OX=3702 GN=SLAH1 PE=2 SV=1)	PF03595(SLAC1:Voltage-dependent anion channel)
TRINITY_DN7853_c0_g1	Cluster 6	anthocyanidin 3-O-glucosyltransferase 7 [Selaginella moellendorffii]	2.49596	1.31959	9.63249e-10	9.54562e-08	yes	up	GO:0016758(molecular_function:transferase activity, transferring hexosyl groups)	K13691	SGT1				sp|Q6VAA6|U74G1_STERE(UDP-glycosyltransferase 74G1 OS=Stevia rebaudiana OX=55670 GN=UGT74G1 PE=1 SV=1)	PF00201(UDPGT:UDP-glucoronosyl and UDP-glucosyl transferase); PF04101(Glyco_tran_28_C:Glycosyltransferase family 28 C-terminal domain)
TRINITY_DN44989_c0_g5	Cluster 6		8.30547	3.05406	1.36587e-09	1.2989e-07	yes	up
TRINITY_DN32977_c0_g2	Cluster 6	ribulose bisphosphate carboxylase small chain, chloroplastic-like [Physcomitrella patens]	227.502	7.82973	1.40004e-09	1.32426e-07	yes	up	GO:0004497(molecular_function:monooxygenase activity); GO:0009536(cellular_component:plastid); GO:0016984(molecular_function:ribulose-bisphosphate carboxylase activity); GO:0009853(biological_process:photorespiration); GO:0015977(biological_process:carbon fixation); GO:0015979(biological_process:photosynthesis)	K01602	rbcS	map00630(Glyoxylate and dicarboxylate metabolism); map00710(Carbon fixation in photosynthetic organisms)	COG4451(C:Energy production and conversion)	COG4451(RuBisCO catalyzes two reactions the carboxylation of D- ribulose 1,5-bisphosphate, the primary event in carbon dioxide fixation, as well as the oxidative fragmentation of the pentose substrate. Both reactions occur simultaneously and in competition at the same active site)	sp|P17537|RBS_CHLMO(Ribulose bisphosphate carboxylase small chain, chloroplastic OS=Chlamydomonas moewusii OX=3054 GN=RBCS PE=2 SV=1)	PF00101(RuBisCO_small:Ribulose bisphosphate carboxylase, small chain)
TRINITY_DN21702_c0_g1	Cluster 6		24.1968	4.59674	1.43764e-09	1.35439e-07	yes	up
TRINITY_DN73694_c0_g3	Cluster 6		172.6	7.43129	2.37894e-09	2.13853e-07	yes	up					COG0577(V:Defense mechanisms)	COG0577(ABC transporter (permease))
TRINITY_DN12632_c0_g1	Cluster 6	hypothetical protein AXG93_3102s1420 [Marchantia polymorpha subsp. ruderalis]	5.6139	2.489	3.285e-09	2.87618e-07	yes	up	GO:0008270(molecular_function:zinc ion binding); GO:0003676(molecular_function:nucleic acid binding)				ENOG410YJRW(S:Function unknown)	ENOG410YJRW(-)		PF14223(Retrotran_gag_2:gag-polypeptide of LTR copia-type)
TRINITY_DN20092_c0_g2	Cluster 6		8.25486	3.04524	4.89929e-09	4.15569e-07	yes	up		K03046	rpoC	map03020(RNA polymerase)	ENOG411220X(S:Function unknown); COG0048(J:Translation, ribosomal structure and biogenesis); ENOG410Y13W(S:Function unknown)	ENOG411220X(unknow protein); COG0048(Interacts with and stabilizes bases of the 16S rRNA that are involved in tRNA selection in the A site and with the mRNA backbone. Located at the interface of the 30S and 50S subunits, it traverses the body of the 30S subunit contacting proteins on the other side and probably holding the rRNA structure together. The combined cluster of proteins S8, S12 and S17 …
TRINITY_DN6196_c0_g1	Cluster 6	hypothetical protein AXG93_1403s1010 [Marchantia polymorpha subsp. ruderalis]	3.47465	1.79687	5.82591e-09	4.83715e-07	yes	up	GO:0016758(molecular_function:transferase activity, transferring hexosyl groups); GO:0005576(cellular_component:extracellular region); GO:0030145(molecular_function:manganese ion binding); GO:0045735(molecular_function:nutrient reservoir activity)	K23260	TOGT1	map00940(Phenylpropanoid biosynthesis)	COG1819(S:Function unknown)	COG1819(Transferase)	sp|Q9AT54|SCGT_TOBAC(Scopoletin glucosyltransferase OS=Nicotiana tabacum OX=4097 GN=TOGT1 PE=1 SV=1)	PF00201(UDPGT:UDP-glucoronosyl and UDP-glucosyl transferase)
TRINITY_DN39398_c0_g1	Cluster 6		3.82853	1.93679	9.90011e-09	7.91303e-07	yes	up					ENOG410YUPY(S:Function unknown); ENOG410Y65V(S:Function unknown); ENOG410Y42B(S:Function unknown)	ENOG410YUPY(Retroelement); ENOG410Y65V(Retrotransposon protein); ENOG410Y42B(-)
TRINITY_DN44510_c1_g1	Cluster 6	probable acyl-activating enzyme 1, peroxisomal [Selaginella moellendorffii]	2.36923	1.24442	1.0224e-08	8.11812e-07	yes	up	GO:0003824(molecular_function:catalytic activity)				COG0318(I:Lipid transport and metabolism); COG0318(Q:Secondary metabolites biosynthesis, transport and catabolism)	COG0318(Amp-dependent synthetase and ligase); COG0318(Amp-dependent synthetase and ligase)	sp|F4HUK6|AAE1_ARATH(Probable acyl-activating enzyme 1, peroxisomal OS=Arabidopsis thaliana OX=3702 GN=AAE1 PE=2 SV=1)	PF00501(AMP-binding:AMP-binding enzyme); PF13193(AMP-binding_C:AMP-binding enzyme C-terminal domain)
TRINITY_DN22501_c0_g2	Cluster 6		7.25848	2.85967	1.10871e-08	8.72364e-07	yes	up					ENOG410YBST(S:Function unknown)	ENOG410YBST(Mariner sub-class)		PF01498(HTH_Tnp_Tc3_2:Transposase); PF13936(HTH_38:Helix-turn-helix domain); PF13412(HTH_24:Winged helix-turn-helix DNA-binding); PF12728(HTH_17:Helix-turn-helix domain)
TRINITY_DN39671_c0_g1	Cluster 6	elongation of fatty acids protein 3-like [Physcomitrella patens]	188.364	7.55738	1.17797e-08	9.17664e-07	yes	up	GO:0016021(cellular_component:integral component of membrane)	K10203	ELOVL6	map01040(Biosynthesis of unsaturated fatty acids); map00062(Fatty acid elongation)	ENOG410Z3FZ(I:Lipid transport and metabolism)	ENOG410Z3FZ(fatty acid elongase)	sp|Q5ZJR8|ELOV6_CHICK(Elongation of very long chain fatty acids protein 6 OS=Gallus gallus OX=9031 GN=ELOVL6 PE=2 SV=1)	PF01151(ELO:GNS1/SUR4 family)
TRINITY_DN19128_c0_g1	Cluster 6		12.488	3.64247	1.38144e-08	1.06443e-06	yes	up
TRINITY_DN4875_c0_g1	Cluster 6		5.59338	2.48372	1.62395e-08	1.22589e-06	yes	up
TRINITY_DN68841_c1_g6	Cluster 6		177.481	7.47152	1.66503e-08	1.25422e-06	yes	up
TRINITY_DN20048_c0_g1	Cluster 6	hypothetical protein SELMODRAFT_74043, partial [Selaginella moellendorffii]	2.32053	1.21445	1.91525e-08	1.41702e-06	yes	up	GO:0019898(cellular_component:extrinsic component of membrane); GO:0009654(cellular_component:photosystem II oxygen evolving complex); GO:0005509(molecular_function:calcium ion binding); GO:0015979(biological_process:photosynthesis)	K02717	psbP	map00195(Photosynthesis)	ENOG4111N4V(G:Carbohydrate transport and metabolism)	ENOG4111N4V(Photosystem II oxygen evolving complex protein PsbP)	sp|P82538|PPL1_ARATH(PsbP-like protein 1, chloroplastic OS=Arabidopsis thaliana OX=3702 GN=PPL1 PE=1 SV=1)	PF01789(PsbP:PsbP)
TRINITY_DN73694_c0_g1	Cluster 6		162.072	7.34049	1.96272e-08	1.44158e-06	yes	up								PF13966(zf-RVT:zinc-binding in reverse transcriptase)
TRINITY_DN8370_c0_g1	Cluster 6		178.001	7.47574	2.37873e-08	1.71679e-06	yes	up
TRINITY_DN70610_c0_g1	Cluster 6		131.321	7.03695	2.782e-08	1.95979e-06	yes	up
TRINITY_DN24621_c0_g1	Cluster 6	hypothetical protein AXG93_509s1570 [Marchantia polymorpha subsp. ruderalis]	2.14788	1.10291	3.1143e-08	2.17438e-06	yes	up					ENOG410YX6S(S:Function unknown)	ENOG410YX6S(Plant protein 1589 of unknown function (A_thal_3526))		PF09713(A_thal_3526:Plant protein 1589 of unknown function (A_thal_3526))
TRINITY_DN15826_c0_g1	Cluster 6		2.49114	1.31681	4.75784e-08	3.20166e-06	yes	up					ENOG4111ACR(T:Signal transduction mechanisms)	ENOG4111ACR(phytochrome kinase substrate)	sp|Q9SWI1|PKS1_ARATH(Protein PHYTOCHROME KINASE SUBSTRATE 1 OS=Arabidopsis thaliana OX=3702 GN=PKS1 PE=1 SV=2)
TRINITY_DN14208_c0_g1	Cluster 6	jasmonic acid-amido synthetase JAR1-like [Physcomitrella patens]	148.872	7.21793	4.87108e-08	3.26543e-06	yes	up		K14506	JAR1_4_6	map04075(Plant hormone signal transduction)	ENOG410XQH0(O:Posttranslational modification, protein turnover, chaperones)	ENOG410XQH0(peptidase (S8 and S53, subtilisin, kexin, sedolisin)	sp|A0A314KSQ4|JAR6_NICAT(Jasmonoyl--L-amino acid synthetase JAR6 OS=Nicotiana attenuata OX=49451 GN=JAR6 PE=1 SV=2)	PF03321(GH3:GH3 auxin-responsive promoter)
TRINITY_DN7467_c0_g3	Cluster 6		147.099	7.20065	5.45555e-08	3.60592e-06	yes	up
TRINITY_DN12754_c1_g1	Cluster 6	hypothetical protein AXG93_4473s1030 [Marchantia polymorpha subsp. ruderalis]	2.52686	1.33735	6.01867e-08	3.9376e-06	yes	up	GO:0015074(biological_process:DNA integration); GO:0003676(molecular_function:nucleic acid binding)				ENOG410XS4D(S:Function unknown); COG2801(L:Replication, recombination and repair)	ENOG410XS4D(Retrotransposon protein); COG2801(Retrotransposon protein)	sp|P10978|POLX_TOBAC(Retrovirus-related Pol polyprotein from transposon TNT 1-94 OS=Nicotiana tabacum OX=4097 PE=2 SV=1)	PF07727(RVT_2:Reverse transcriptase (RNA-dependent DNA polymerase))
TRINITY_DN3752_c0_g1	Cluster 6		16.2294	4.02054	6.66068e-08	4.30974e-06	yes	up
TRINITY_DN11771_c0_g1	Cluster 6		5.51204	2.46259	7.27776e-08	4.65362e-06	yes	up
TRINITY_DN25288_c0_g1	Cluster 6		11.6157	3.53801	1.79969e-07	1.04487e-05	yes	up					ENOG410Y65V(S:Function unknown); ENOG4111SG9(S:Function unknown)	ENOG410Y65V(Retrotransposon protein); ENOG4111SG9(Reverse transcriptase (RNA-dependent DNA polymerase))		PF13966(zf-RVT:zinc-binding in reverse transcriptase)
TRINITY_DN50599_c0_g3	Cluster 6	hypothetical protein MARPO_0082s0009 [Marchantia polymorpha]	22.6794	4.50331	2.81646e-07	1.55229e-05	yes	up					ENOG41120V4(S:Function unknown)	ENOG41120V4(Uncharacterized conserved protein (DUF2358))		PF10184(DUF2358:Uncharacterized conserved protein (DUF2358))
TRINITY_DN67506_c0_g1	Cluster 6	hypothetical protein AXG93_2079s1190 [Marchantia polymorpha subsp. ruderalis]	135.64	7.08364	3.00534e-07	1.64739e-05	yes	up	GO:0005347(molecular_function:ATP transmembrane transporter activity); GO:0016021(cellular_component:integral component of membrane); GO:0005743(cellular_component:mitochondrial inner membrane)	K05863	SLC25A4S, ANT		ENOG410XNW0(U:Intracellular trafficking, secretion, and vesicular transport)	ENOG410XNW0(transmembrane transport)	sp|P31692|ADT_PARKE(ADP,ATP carrier protein OS=Parachlorella kessleri OX=3074 PE=3 SV=1)	PF00153(Mito_carr:Mitochondrial carrier protein)
TRINITY_DN6020_c2_g1	Cluster 6		122.226	6.9334	3.21744e-07	1.75225e-05	yes	up
TRINITY_DN24786_c0_g1	Cluster 6		6.88551	2.78356	3.21906e-07	1.75225e-05	yes	up
TRINITY_DN16350_c0_g3	Cluster 6		116.268	6.86132	4.06095e-07	2.14611e-05	yes	up
TRINITY_DN55729_c0_g1	Cluster 6		6.8773	2.78184	6.38315e-07	3.1784e-05	yes	up
TRINITY_DN23448_c0_g1	Cluster 6		7.80936	2.9652	7.1441e-07	3.50542e-05	yes	up
TRINITY_DN25480_c0_g1	Cluster 6		107.938	6.75405	8.42545e-07	4.05253e-05	yes	up
TRINITY_DN24395_c0_g1	Cluster 6		107.818	6.75246	9.46166e-07	4.49283e-05	yes	up
TRINITY_DN1878_c1_g1	Cluster 6	hypothetical protein AXG93_3109s1020 [Marchantia polymorpha subsp. ruderalis]	2.07218	1.05115	1.05723e-06	4.963e-05	yes	up	GO:0016021(cellular_component:integral component of membrane); GO:0015267(molecular_function:channel activity)	K09872	PIP				sp|Q9SV31|PIP25_ARATH(Probable aquaporin PIP2-5 OS=Arabidopsis thaliana OX=3702 GN=PIP2-5 PE=1 SV=1)	PF00230(MIP:Major intrinsic protein)
TRINITY_DN9833_c0_g1	Cluster 6		2.00261	1.00188	1.08568e-06	5.07012e-05	yes	up					ENOG41120RW(S:Function unknown)	ENOG41120RW(expressed protein)
TRINITY_DN23805_c0_g1	Cluster 6	60S ribosomal protein L18-2-like [Physcomitrella patens]	107.39	6.74672	1.61821e-06	7.15774e-05	yes	up	GO:0003735(molecular_function:structural constituent of ribosome); GO:0006412(biological_process:translation); GO:0005840(cellular_component:ribosome)	K02883	RP-L18e, RPL18	map03010(Ribosome)	COG1727(L:Replication, recombination and repair)	COG1727(Retrotransposon protein)	sp|O65729|RL18_CICAR(60S ribosomal protein L18 (Fragment) OS=Cicer arietinum OX=3827 GN=RPL18 PE=2 SV=1)	PF17135(Ribosomal_L18:Ribosomal protein 60S L18 and 50S L18e); PF00828(Ribosomal_L27A:Ribosomal proteins 50S-L15, 50S-L18e, 60S-L27A)
TRINITY_DN31043_c0_g3	Cluster 6	40S ribosomal protein S3a-2-like [Physcomitrella patens]	105.324	6.71869	1.76049e-06	7.72613e-05	yes	up	GO:0050660(molecular_function:flavin adenine dinucleotide binding); GO:0022627(cellular_component:cytosolic small ribosomal subunit); GO:0005829(cellular_component:cytosol); GO:0003735(molecular_function:structural constituent of ribosome); GO:0017150(molecular_function:tRNA dihydrouridine synthase activity); GO:0006412(biological_process:translation); GO:0005840(cellular_component:ribosome)	K02984	RP-S3Ae, RPS3A	map03010(Ribosome)	COG1890(J:Translation, ribosomal structure and biogenesis)	COG1890(Ribosomal protein)	sp|A8HS48|RS3A_CHLRE(40S ribosomal protein S3a OS=Chlamydomonas reinhardtii OX=3055 GN=CHLREDRAFT_168484 PE=3 SV=1)	PF01015(Ribosomal_S3Ae:Ribosomal S3Ae family)
TRINITY_DN2978_c2_g1	Cluster 6		3.42014	1.77406	2.14519e-06	9.15296e-05	yes	up
TRINITY_DN35703_c2_g1	Cluster 6		99.4561	6.63599	2.17183e-06	9.24987e-05	yes	up
TRINITY_DN33223_c1_g6	Cluster 6	hypothetical protein MARPO_0083s0026 [Marchantia polymorpha]	93.7768	6.55116	2.56662e-06	0.000106363	yes	up	GO:0016021(cellular_component:integral component of membrane); GO:0008234(molecular_function:cysteine-type peptidase activity)				COG4870(O:Posttranslational modification, protein turnover, chaperones)	COG4870(cathepsin)	sp|O65493|XCP1_ARATH(Cysteine protease XCP1 OS=Arabidopsis thaliana OX=3702 GN=XCP1 PE=1 SV=1)	PF00112(Peptidase_C1:Papain family cysteine protease); PF08246(Inhibitor_I29:Cathepsin propeptide inhibitor domain (I29))
TRINITY_DN14974_c0_g1	Cluster 6		5.39307	2.43111	2.61405e-06	0.000108139	yes	up					ENOG410YBST(S:Function unknown)	ENOG410YBST(Mariner sub-class)
TRINITY_DN90532_c0_g1	Cluster 6		90.1251	6.49386	3.17722e-06	0.000128723	yes	up
TRINITY_DN32976_c0_g1	Cluster 6		97.6388	6.60938	3.34996e-06	0.000135025	yes	up
TRINITY_DN55952_c0_g3	Cluster 6	hypothetical protein AXG93_1440s1070 [Marchantia polymorpha subsp. ruderalis]	95.1201	6.57168	4.16892e-06	0.000163465	yes	up	GO:0003735(molecular_function:structural constituent of ribosome); GO:0006412(biological_process:translation); GO:0015934(cellular_component:large ribosomal subunit); GO:0005840(cellular_component:ribosome); GO:0003723(molecular_function:RNA binding)	K02865	RP-L10Ae, RPL10A	map03010(Ribosome)	COG0081(J:Translation, ribosomal structure and biogenesis)	COG0081(Binds directly to 23S rRNA. The L1 stalk is quite mobile in the ribosome, and is involved in E site tRNA release (By similarity))	sp|B8B9K6|R10A_ORYSI(60S ribosomal protein L10a OS=Oryza sativa subsp. indica OX=39946 GN=RPL10A PE=3 SV=1)	PF00687(Ribosomal_L1:Ribosomal protein L1p/L10e family)
TRINITY_DN5310_c0_g3	Cluster 6	hypothetical protein SELMODRAFT_91501 [Selaginella moellendorffii]	2.23017	1.15715	4.49001e-06	0.000174409	yes	up	GO:0005509(molecular_function:calcium ion binding); GO:0019722(biological_process:calcium-mediated signaling)				COG5126(D:Cell cycle control, cell division, chromosome partitioning); COG5126(T:Signal transduction mechanisms); COG5126(Z:Cytoskeleton)	COG5126(Calcium-binding protein); COG5126(Calcium-binding protein); COG5126(Calcium-binding protein)	sp|Q5Z676|CML29_ORYSJ(Probable calcium-binding protein CML29 OS=Oryza sativa subsp. japonica OX=39947 GN=CML29 PE=2 SV=1)	PF00036(EF-hand_1:EF hand); PF13499(EF-hand_7:EF-hand domain pair); PF13405(EF-hand_6:EF-hand domain); PF13202(EF-hand_5:EF hand); PF13833(EF-hand_8:EF-hand domain pair)
TRINITY_DN58008_c0_g1	Cluster 6	hypothetical protein MARPO_0004s0172 [Marchantia polymorpha]	94.8512	6.56759	5.70175e-06	0.00021452	yes	up	GO:0000028(biological_process:ribosomal small subunit assembly); GO:0022627(cellular_component:cytosolic small ribosomal subunit); GO:0003735(molecular_function:structural constituent of ribosome); GO:0005840(cellular_component:ribosome); GO:0003723(molecular_function:RNA binding); GO:0006412(biological_process:translation); GO:0015935(cellular_component:small ribosomal subunit)	K02958	RP-S15e, RPS15	map03010(Ribosome)	COG0185(J:Translation, ribosomal structure and biogenesis)	COG0185(Methyltransferase)	sp|P34737|RS15_PODAS(40S ribosomal protein S15 OS=Podospora anserina OX=2587412 GN=RPS15 PE=3 SV=1)	PF00203(Ribosomal_S19:Ribosomal protein S19)
TRINITY_DN87991_c0_g1	Cluster 6		83.9814	6.392	6.00462e-06	0.000223534	yes	up
TRINITY_DN30242_c1_g1	Cluster 6	actin [Selaginella moellendorffii]	92.948	6.53835	6.09254e-06	0.000226093	yes	up	GO:0005737(cellular_component:cytoplasm); GO:0005856(cellular_component:cytoskeleton); GO:0005524(molecular_function:ATP binding)	K05692;K10355	ACTB_G1;ACTF	map04145(Phagosome)	COG5277(S:Function unknown)	COG5277(expressed protein)	sp|P27131|ACT1_NAEFO(Actin-1 OS=Naegleria fowleri OX=5763 PE=2 SV=2)	PF00022(Actin:Actin)
TRINITY_DN29105_c0_g1	Cluster 6	protein DMR6-LIKE OXYGENASE 2 [Selaginella moellendorffii]	2.44957	1.29253	7.12099e-06	0.000257102	yes	up	GO:0046872(molecular_function:metal ion binding); GO:0051213(molecular_function:dioxygenase activity); GO:0016491(molecular_function:oxidoreductase activity)				COG3491(K:Transcription)	COG3491(Transcription factor)	sp|Q84MB3|ACCH1_ARATH(1-aminocyclopropane-1-carboxylate oxidase homolog 1 OS=Arabidopsis thaliana OX=3702 GN=At1g06620 PE=2 SV=1)	PF03171(2OG-FeII_Oxy:2OG-Fe(II) oxygenase superfamily); PF14226(DIOX_N:non-haem dioxygenase in morphine synthesis N-terminal)
TRINITY_DN25968_c0_g1	Cluster 6		81.8229	6.35443	7.64537e-06	0.000273935	yes	up
TRINITY_DN79580_c0_g1	Cluster 6		87.0284	6.44341	7.92693e-06	0.000282025	yes	up
TRINITY_DN98_c4_g2	Cluster 6		4.21179	2.07443	8.00719e-06	0.000284354	yes	up
TRINITY_DN16674_c0_g3	Cluster 6		81.6564	6.35149	8.05872e-06	0.000285559	yes	up
TRINITY_DN88033_c0_g1	Cluster 6	hypothetical protein AXG93_2167s1280 [Marchantia polymorpha subsp. ruderalis]	85.1743	6.41235	8.73959e-06	0.00030661	yes	up	GO:0005840(cellular_component:ribosome); GO:0019843(molecular_function:rRNA binding); GO:0003735(molecular_function:structural constituent of ribosome); GO:0003723(molecular_function:RNA binding); GO:0006412(biological_process:translation); GO:0022627(cellular_component:cytosolic small ribosomal subunit)	K02987	RP-S4e, RPS4	map03010(Ribosome)	COG1471(J:Translation, ribosomal structure and biogenesis)	COG1471((ribosomal) protein)	sp|Q642H9|RS4X_DANRE(40S ribosomal protein S4, X isoform OS=Danio rerio OX=7955 GN=rps4x PE=2 SV=3)	PF00900(Ribosomal_S4e:Ribosomal family S4e); PF08071(RS4NT:RS4NT (NUC023) domain); PF16121(40S_S4_C:40S ribosomal protein S4 C-terminus); PF01479(S4:S4 domain); PF00467(KOW:KOW motif)
TRINITY_DN11913_c1_g1	Cluster 6		61.856	5.95084	8.77753e-06	0.000307788	yes	up
TRINITY_DN24463_c0_g1	Cluster 6		81.4881	6.34852	8.80272e-06	0.000308519	yes	up
TRINITY_DN4540_c0_g1	Cluster 6		91.5941	6.51718	9.11086e-06	0.000318214	yes	up								PF07740(Toxin_12:Ion channel inhibitory toxin)
TRINITY_DN37774_c0_g1	Cluster 6		3.4768	1.79776	9.15065e-06	0.000319445	yes	up
TRINITY_DN10199_c0_g1	Cluster 6		7.69386	2.94371	9.23673e-06	0.000321656	yes	up					COG1485(S:Function unknown)	COG1485(AFG1 family ATPase)
TRINITY_DN4744_c0_g1	Cluster 6	uncharacterized protein LOC9635407 [Selaginella moellendorffii]	2.06884	1.04882	9.46864e-06	0.000328237	yes	up	GO:0005548(molecular_function:phospholipid transporter activity); GO:0003676(molecular_function:nucleic acid binding)				ENOG410XUP5(S:Function unknown)	ENOG410XUP5(expressed protein)		PF04784(DUF547:Protein of unknown function, DUF547); PF14389(Lzipper-MIP1:Leucine-zipper of ternary complex factor MIP1)
TRINITY_DN23540_c0_g1	Cluster 6		79.4457	6.3119	1.01224e-05	0.00034736	yes	up
TRINITY_DN29088_c1_g3	Cluster 6		23.6958	4.56656	1.04863e-05	0.000357764	yes	up
TRINITY_DN20448_c0_g3	Cluster 6	pathogenesis-related protein PRMS-like [Physcomitrella patens]	3.53381	1.82122	1.12752e-05	0.000380706	yes	up	GO:0005576(cellular_component:extracellular region)	K13449	PR1	map04016(MAPK signaling pathway - plant); map04626(Plant-pathogen interaction); map04075(Plant hormone signal transduction)	COG2340(S:Function unknown)	COG2340(Scp-like extracellular)	sp|P08299|PR1A_TOBAC(Pathogenesis-related protein 1A OS=Nicotiana tabacum OX=4097 PE=1 SV=1)	PF00188(CAP:Cysteine-rich secretory protein family)
TRINITY_DN13828_c1_g1	Cluster 6		77.4019	6.2743	1.21674e-05	0.000407254	yes	up
TRINITY_DN14029_c0_g1	Cluster 6	hypothetical protein MARPO_0152s0014 [Marchantia polymorpha]	2.32895	1.21968	1.51444e-05	0.000495035	yes	up	GO:0016491(molecular_function:oxidoreductase activity)	K00306	PIPOX	map04146(Peroxisome); map00310(Lysine degradation); map00260(Glycine, serine and threonine metabolism)	COG0665(E:Amino acid transport and metabolism)	COG0665(Catalyzes the last two steps in the biosynthesis of 5- methylaminomethyl-2-thiouridine (mnm(5)s(2)U) at the wobble position (U34) in tRNA. Catalyzes the FAD-dependent demodification of cmnm(5)s(2)U34 to nm(5)s(2)U34, followed by the transfer of a methyl group from S-adenosyl-L-methionine to nm(5)s(2)U34, to form mnm(5)s(2)U34 (By similarity))	sp|Q9SJA7|SOX_ARATH(Probable sarcosine oxidase OS=Arabidopsis thaliana OX=3702 GN=At2g24580 PE=2 SV=1)	PF01266(DAO:FAD dependent oxidoreductase); PF13450(NAD_binding_8:NAD(P)-binding Rossmann-like domain); PF12831(FAD_oxidored:FAD dependent oxidoreductase); PF01134(GIDA:Glucose inhibited division protein A); PF00890(FAD_binding_2:FAD binding domain)
TRINITY_DN25065_c0_g2	Cluster 6		79.2269	6.30792	1.58173e-05	0.000512426	yes	up					ENOG410Y65V(S:Function unknown)	ENOG410Y65V(Retrotransposon protein)	sp|P0C2F6|RNHX1_ARATH(Putative ribonuclease H protein At1g65750 OS=Arabidopsis thaliana OX=3702 GN=At1g65750 PE=3 SV=1)
TRINITY_DN66996_c0_g1	Cluster 6		2.38344	1.25304	1.69722e-05	0.000541891	yes	up
TRINITY_DN38392_c0_g1	Cluster 6		57.4567	5.8444	1.90912e-05	0.00060059	yes	up
TRINITY_DN33223_c1_g2	Cluster 6	hypothetical protein AXG93_492s1080 [Marchantia polymorpha subsp. ruderalis]	75.1959	6.23258	2.10531e-05	0.000651006	yes	up	GO:0016021(cellular_component:integral component of membrane); GO:0008234(molecular_function:cysteine-type peptidase activity)	K16292	CEP, CYSEP		COG4870(O:Posttranslational modification, protein turnover, chaperones)	COG4870(cathepsin)	sp|O65039|CYSEP_RICCO(Vignain OS=Ricinus communis OX=3988 GN=CYSEP PE=1 SV=1)	PF00112(Peptidase_C1:Papain family cysteine protease)
TRINITY_DN17768_c0_g2	Cluster 6		10.1072	3.33731	2.15759e-05	0.000664556	yes	up
TRINITY_DN71267_c1_g2	Cluster 6		16.3524	4.03143	2.92489e-05	0.000860742	yes	up								PF03732(Retrotrans_gag:Retrotransposon gag protein)
TRINITY_DN37625_c2_g2	Cluster 6	hypothetical protein AXG93_1550s1160 [Marchantia polymorpha subsp. ruderalis]	74.7369	6.22375	2.99845e-05	0.000878359	yes	up	GO:0015935(cellular_component:small ribosomal subunit); GO:0019843(molecular_function:rRNA binding); GO:0003735(molecular_function:structural constituent of ribosome); GO:0003723(molecular_function:RNA binding); GO:0006412(biological_process:translation); GO:0009507(cellular_component:chloroplast)	K02989	RP-S5e, RPS5	map03010(Ribosome)	COG0049(K:Transcription)	COG0049(Transcription factor)	sp|O65731|RS5_CICAR(40S ribosomal protein S5 (Fragment) OS=Cicer arietinum OX=3827 GN=RPS5 PE=2 SV=1)	PF00177(Ribosomal_S7:Ribosomal protein S7p/S5e)
TRINITY_DN10704_c0_g2	Cluster 6	putative germin-like protein 3-2 [Selaginella moellendorffii]	8.29	3.05137	3.12119e-05	0.000907209	yes	up	GO:0048046(cellular_component:apoplast); GO:0005618(cellular_component:cell wall); GO:0005576(cellular_component:extracellular region); GO:0030145(molecular_function:manganese ion binding); GO:0045735(molecular_function:nutrient reservoir activity)						sp|Q9ZRA4|AB19A_PRUPE(Auxin-binding protein ABP19a OS=Prunus persica OX=3760 GN=ABP19A PE=3 SV=1)	PF00190(Cupin_1:Cupin); PF07883(Cupin_2:Cupin domain)
TRINITY_DN15101_c0_g1	Cluster 6	kaurene synthase, partial [Dryopteris fragrans]	2.10494	1.07378	3.31945e-05	0.000960059	yes	up	GO:0050559(molecular_function:copalyl diphosphate synthase activity); GO:0010333(molecular_function:terpene synthase activity); GO:0000287(molecular_function:magnesium ion binding); GO:0009686(biological_process:gibberellin biosynthetic process); GO:0009905(molecular_function:ent-copalyl diphosphate synthase activity); GO:0016114(biological_process:terpenoid biosynthetic process); GO:0009507(cell…	K14175	NES1	map00909(Sesquiterpenoid and triterpenoid biosynthesis)	ENOG410YDA6(S:Function unknown)	ENOG410YDA6(synthase)	sp|P0CV94|NES1_FRAAN((3S,6E)-nerolidol synthase 1 OS=Fragaria ananassa OX=3747 PE=1 SV=1)	PF03936(Terpene_synth_C:Terpene synthase family, metal binding domain); PF19086(Terpene_syn_C_2:Terpene synthase family 2, C-terminal metal binding)
TRINITY_DN65950_c0_g2	Cluster 6		69.1723	6.11212	3.54891e-05	0.00101726	yes	up
TRINITY_DN58299_c0_g2	Cluster 6		63.4306	5.98711	4.93414e-05	0.00134661	yes	up
TRINITY_DN42070_c0_g1	Cluster 6	probable trehalose-phosphate phosphatase C [Physcomitrella patens]	5.31121	2.40904	4.93612e-05	0.00134661	yes	up	GO:0005992(biological_process:trehalose biosynthetic process); GO:0004805(molecular_function:trehalose-phosphatase activity)	K01087	otsB	map00500(Starch and sucrose metabolism)	COG1877(G:Carbohydrate transport and metabolism)	COG1877(trehalose biosynthetic process)	sp|Q6ZAL2|TPP6_ORYSJ(Probable trehalose-phosphate phosphatase 6 OS=Oryza sativa subsp. japonica OX=39947 GN=TPP6 PE=2 SV=1)	PF02358(Trehalose_PPase:Trehalose-phosphatase); PF08282(Hydrolase_3:haloacid dehalogenase-like hydrolase)
TRINITY_DN28307_c0_g6	Cluster 6	ran-binding protein 1 homolog b-like [Physcomitrella patens]	65.0347	6.02314	5.01206e-05	0.00136413	yes	up	GO:0046907(biological_process:intracellular transport)	K15306	RANBP1		COG5171(U:Intracellular trafficking, secretion, and vesicular transport)	COG5171(ran binding protein)	sp|Q8RWG8|RBP1B_ARATH(Ran-binding protein 1 homolog b OS=Arabidopsis thaliana OX=3702 GN=RANBP1B PE=1 SV=2)
TRINITY_DN71801_c0_g2	Cluster 6		8.64012	3.11105	5.06127e-05	0.0013728	yes	up							sp|Q94HW2|POLR1_ARATH(Retrovirus-related Pol polyprotein from transposon RE1 OS=Arabidopsis thaliana OX=3702 GN=RE1 PE=2 SV=1)
TRINITY_DN89685_c0_g1	Cluster 6	aspartyl protease family protein 2 [Selaginella moellendorffii]	4.4575	2.15624	5.27088e-05	0.00142007	yes	up	GO:0004190(molecular_function:aspartic-type endopeptidase activity)				ENOG410XNV7(S:Function unknown)	ENOG410XNV7(WD and tetratricopeptide repeats)	sp|P0DO21|GIP2_NICBE(Probable aspartic proteinase GIP2 OS=Nicotiana benthamiana OX=4100 GN=GIP2 PE=1 SV=1)	PF14543(TAXi_N:Xylanase inhibitor N-terminal); PF14541(TAXi_C:Xylanase inhibitor C-terminal)
TRINITY_DN17869_c0_g1	Cluster 6	hypothetical protein AXG93_3954s1070 [Marchantia polymorpha subsp. ruderalis]	63.29	5.9839	5.45895e-05	0.00146325	yes	up	GO:0015074(biological_process:DNA integration); GO:0003676(molecular_function:nucleic acid binding)							PF17921(Integrase_H2C2:Integrase zinc binding domain)
TRINITY_DN6829_c1_g4	Cluster 6		65.1882	6.02654	5.63978e-05	0.00150317	yes	up
TRINITY_DN22838_c0_g6	Cluster 6	tubulin alpha chain [Selaginella moellendorffii]	74.8064	6.22509	5.65318e-05	0.0015048	yes	up	GO:0005737(cellular_component:cytoplasm); GO:0007017(biological_process:microtubule-based process); GO:0003924(molecular_function:GTPase activity); GO:0005200(molecular_function:structural constituent of cytoskeleton); GO:0005874(cellular_component:microtubule); GO:0005525(molecular_function:GTP binding)	K07374	TUBA	map04145(Phagosome)	COG5023(Z:Cytoskeleton)	COG5023(protein polymerization)	sp|Q40832|TBA2_PELFA(Tubulin alpha-2 chain OS=Pelvetia fastigiata OX=48072 GN=TUBA2 PE=2 SV=1)	PF00091(Tubulin:Tubulin/FtsZ family, GTPase domain)
TRINITY_DN10566_c0_g1	Cluster 6		2.29756	1.2001	5.65441e-05	0.0015048	yes	up								PF03732(Retrotrans_gag:Retrotransposon gag protein); PF00098(zf-CCHC:Zinc knuckle)
TRINITY_DN9020_c0_g1	Cluster 6		2.75228	1.46063	5.66161e-05	0.00150614	yes	up		K07466	RFA1, RPA1, rpa	map03430(Mismatch repair); map03440(Homologous recombination); map03420(Nucleotide excision repair); map03030(DNA replication)
TRINITY_DN15698_c1_g1	Cluster 6		2.96842	1.56969	5.91696e-05	0.00156582	yes	up
TRINITY_DN23048_c0_g1	Cluster 6	hypothetical protein AXG93_977s1010 [Marchantia polymorpha subsp. ruderalis]	66.7006	6.05963	6.11981e-05	0.00161011	yes	up	GO:0000049(molecular_function:tRNA binding); GO:0004822(molecular_function:isoleucine-tRNA ligase activity); GO:0016021(cellular_component:integral component of membrane); GO:0003924(molecular_function:GTPase activity); GO:0006428(biological_process:isoleucyl-tRNA aminoacylation); GO:0002161(molecular_function:aminoacyl-tRNA editing activity); GO:0003746(molecular_function:translation elongation …	K03231	EEF1A	map03013(RNA transport)	COG5256(I:Lipid transport and metabolism)	COG5256(Squalene--hopene cyclase)	sp|P86934|EF1A1_TRYB2(Elongation factor 1-alpha 1 OS=Trypanosoma brucei brucei (strain 927/4 GUTat10.1) OX=185431 GN=TEF1 PE=1 SV=1)	PF03143(GTP_EFTU_D3:Elongation factor Tu C-terminal domain); PF00009(GTP_EFTU:Elongation factor Tu GTP binding domain); PF03144(GTP_EFTU_D2:Elongation factor Tu domain 2)
TRINITY_DN19209_c0_g1	Cluster 6	hypothetical protein SELMODRAFT_97661, partial [Selaginella moellendorffii]	51.7954	5.69475	6.42586e-05	0.00167787	yes	up	GO:0004252(molecular_function:serine-type endopeptidase activity)				COG1404(O:Posttranslational modification, protein turnover, chaperones)	COG1404(peptidase (S8 and S53, subtilisin, kexin, sedolisin)	sp|Q8GUK4|SBT3D_ARATH(Subtilisin-like protease SBT3.13 OS=Arabidopsis thaliana OX=3702 GN=SBT3.13 PE=2 SV=1)	PF00082(Peptidase_S8:Subtilase family)
TRINITY_DN21767_c0_g2	Cluster 6		68.6671	6.10155	6.70231e-05	0.00173913	yes	up
TRINITY_DN20967_c0_g1	Cluster 6		3.07989	1.62288	6.90779e-05	0.00178068	yes	up
TRINITY_DN24302_c1_g1	Cluster 6		62.9768	5.97675	7.11975e-05	0.00182798	yes	up
TRINITY_DN31389_c1_g2	Cluster 6		61.0259	5.93135	7.55589e-05	0.00191766	yes	up
TRINITY_DN8505_c0_g1	Cluster 6	hypothetical protein MARPO_0001s0423 [Marchantia polymorpha]	2.27766	1.18755	7.95114e-05	0.00200388	yes	up	GO:0010150(biological_process:leaf senescence); GO:0007623(biological_process:circadian rhythm); GO:0042542(biological_process:response to hydrogen peroxide); GO:0009941(cellular_component:chloroplast envelope); GO:0016021(cellular_component:integral component of membrane); GO:1990641(biological_process:response to iron ion starvation); GO:0055072(biological_process:iron ion homeostasis); GO:1901…				COG0661(S:Function unknown)	COG0661(Ribosomal protein)	sp|Q93Y08|AB1K8_ARATH(Protein ACTIVITY OF BC1 COMPLEX KINASE 8, chloroplastic OS=Arabidopsis thaliana OX=3702 GN=ABC1K8 PE=2 SV=1)
TRINITY_DN79165_c0_g1	Cluster 6	60S ribosomal protein L19-3-like [Physcomitrella patens]	60.9348	5.9292	8.39417e-05	0.00209061	yes	up	GO:0003735(molecular_function:structural constituent of ribosome); GO:0022625(cellular_component:cytosolic large ribosomal subunit); GO:0003723(molecular_function:RNA binding); GO:0006412(biological_process:translation)	K02885	RP-L19e, RPL19	map03010(Ribosome)	COG2147(J:Translation, ribosomal structure and biogenesis)	COG2147(ribosomal protein L19)	sp|Q9SRX2|RL191_ARATH(60S ribosomal protein L19-1 OS=Arabidopsis thaliana OX=3702 GN=RPL19A PE=2 SV=1)	PF01280(Ribosomal_L19e:Ribosomal protein L19e)
TRINITY_DN30141_c0_g3	Cluster 6	actin [Selaginella moellendorffii]	60.9348	5.9292	8.39417e-05	0.00209061	yes	up	GO:0005737(cellular_component:cytoplasm); GO:0005856(cellular_component:cytoskeleton); GO:0005524(molecular_function:ATP binding)	K05692	ACTB_G1	map04145(Phagosome)	COG5277(Z:Cytoskeleton)	COG5277(Actin-related protein)	sp|P22131|ACT1_PHYIN(Actin-1 OS=Phytophthora infestans OX=4787 GN=ACTA PE=2 SV=1)	PF00022(Actin:Actin)
TRINITY_DN13016_c0_g1	Cluster 6		2.97455	1.57267	8.52494e-05	0.00212094	yes	up		K22312	ST2A, SOT15		ENOG4111H56(S:Function unknown)	ENOG4111H56(Sulfotransferase)	sp|Q9ZPQ5|SOT13_ARATH(Cytosolic sulfotransferase 13 OS=Arabidopsis thaliana OX=3702 GN=SOT13 PE=3 SV=1)	PF00685(Sulfotransfer_1:Sulfotransferase domain)
TRINITY_DN306_c0_g3	Cluster 6		3.97423	1.99068	8.58391e-05	0.00213336	yes	up
TRINITY_DN36691_c0_g1	Cluster 6		59.1128	5.8854	9.14419e-05	0.00224928	yes	up
TRINITY_DN67520_c0_g2	Cluster 6	glyceraldehyde-3-phosphate dehydrogenase A, chloroplastic [Selaginella moellendorffii]	58.9688	5.88188	0.000107027	0.00257829	yes	up	GO:0051287(molecular_function:NAD binding); GO:0050661(molecular_function:NADP binding); GO:0006006(biological_process:glucose metabolic process); GO:0016620(molecular_function:oxidoreductase activity, acting on the aldehyde or oxo group of donors, NAD or NADP as acceptor)	K05298	GAPA	map00710(Carbon fixation in photosynthetic organisms)	COG0057(G:Carbohydrate transport and metabolism)	COG0057(glyceraldehyde3phosphate dehydrogenase)	sp|P50362|G3PA_CHLRE(Glyceraldehyde-3-phosphate dehydrogenase A, chloroplastic OS=Chlamydomonas reinhardtii OX=3055 GN=GAPA PE=1 SV=1)	PF02800(Gp_dh_C:Glyceraldehyde 3-phosphate dehydrogenase, C-terminal domain); PF00044(Gp_dh_N:Glyceraldehyde 3-phosphate dehydrogenase, NAD binding domain)
TRINITY_DN27476_c0_g6	Cluster 6		3.69031	1.88374	0.00010892	0.00261767	yes	up
TRINITY_DN17724_c0_g1	Cluster 6		2.97336	1.5721	0.000109321	0.00262642	yes	up
TRINITY_DN22136_c0_g1	Cluster 6	hypothetical protein AXG93_4620s1950 [Marchantia polymorpha subsp. ruderalis]	2.3247	1.21705	0.000116024	0.00276303	yes	up	GO:0005634(cellular_component:nucleus); GO:0003677(molecular_function:DNA binding)	K09422	MYBP		COG5147(K:Transcription)	COG5147(Myblike DNAbinding domain containing protein)	sp|Q9FKL2|MYB36_ARATH(Transcription factor MYB36 OS=Arabidopsis thaliana OX=3702 GN=MYB36 PE=1 SV=1)	PF00249(Myb_DNA-binding:Myb-like DNA-binding domain); PF13921(Myb_DNA-bind_6:Myb-like DNA-binding domain)
TRINITY_DN21962_c0_g2	Cluster 6		8.13857	3.02478	0.000122594	0.00289413	yes	up
TRINITY_DN31942_c0_g4	Cluster 6		6.28496	2.6519	0.000123676	0.00291285	yes	up
TRINITY_DN36902_c0_g4	Cluster 6		13.6314	3.76886	0.000133599	0.00311337	yes	up
TRINITY_DN83552_c0_g2	Cluster 6		3.41631	1.77244	0.000156559	0.00357415	yes	up
TRINITY_DN33009_c0_g2	Cluster 6	hypothetical protein AXG93_939s1260 [Marchantia polymorpha subsp. ruderalis]	54.8829	5.77828	0.000159798	0.00363399	yes	up	GO:0003735(molecular_function:structural constituent of ribosome); GO:0006412(biological_process:translation); GO:0005840(cellular_component:ribosome)	K02949	RP-S11e, RPS11	map03010(Ribosome)	COG0186(J:Translation, ribosomal structure and biogenesis)	COG0186(One of the primary rRNA binding proteins, it binds specifically to the 5'-end of 16S ribosomal)	sp|Q3T0V4|RS11_BOVIN(40S ribosomal protein S11 OS=Bos taurus OX=9913 GN=RPS11 PE=2 SV=3)	PF16205(Ribosomal_S17_N:Ribosomal_S17 N-terminal); PF00366(Ribosomal_S17:Ribosomal protein S17)
TRINITY_DN43240_c0_g1	Cluster 6		53.1726	5.73261	0.000169065	0.00381527	yes	up
TRINITY_DN18522_c1_g1	Cluster 6		4.64685	2.21625	0.000172181	0.00387816	yes	up
TRINITY_DN25347_c0_g1	Cluster 6		53.0849	5.73023	0.000178105	0.00398617	yes	up
TRINITY_DN4889_c0_g1	Cluster 6		2.43773	1.28554	0.000178565	0.00399395	yes	up
TRINITY_DN47535_c0_g1	Cluster 6		56.5768	5.82214	0.000193626	0.00426886	yes	up					ENOG410Y9HM(S:Function unknown)	ENOG410Y9HM(protein PLASTID MOVEMENT IMPAIRED)		PF05701(WEMBL:Weak chloroplast movement under blue light); PF08317(Spc7:Spc7 kinetochore protein); PF07888(CALCOCO1:Calcium binding and coiled-coil domain (CALCOCO1) like)
TRINITY_DN57603_c0_g2	Cluster 6		52.8916	5.72497	0.000198226	0.0043443	yes	up
TRINITY_DN2372_c1_g1	Cluster 6		8.05818	3.01045	0.000203425	0.00443898	yes	up					ENOG410YRAU(S:Function unknown)	ENOG410YRAU(CACTA, En Spm sub-class)
TRINITY_DN30404_c0_g2	Cluster 6		7.64765	2.93502	0.000205133	0.00446247	yes	up								PF04434(SWIM:SWIM zinc finger)
TRINITY_DN16655_c0_g1	Cluster 6	hypothetical protein SELMODRAFT_80828 [Selaginella moellendorffii]	2.06739	1.04781	0.000216457	0.00465153	yes	up	GO:0016788(molecular_function:hydrolase activity, acting on ester bonds)				COG3240(S:Function unknown)	COG3240(GDSL esterase lipase)	sp|Q9SSA7|GLIP5_ARATH(GDSL esterase/lipase 5 OS=Arabidopsis thaliana OX=3702 GN=GLIP5 PE=2 SV=2)	PF00657(Lipase_GDSL:GDSL-like Lipase/Acylhydrolase)
TRINITY_DN31158_c0_g2	Cluster 6		58.4608	5.8694	0.000223793	0.00478443	yes	up
TRINITY_DN345_c2_g1	Cluster 6		2.04218	1.03011	0.000237893	0.00503409	yes	up		K03260	EIF4G	map03013(RNA transport)
TRINITY_DN10560_c0_g1	Cluster 6	probable glutathione S-transferase [Selaginella moellendorffii]	2.3832	1.2529	0.000289101	0.00590377	yes	up		K00799	GST, gst	map00480(Glutathione metabolism)	ENOG410XSIX(O:Posttranslational modification, protein turnover, chaperones)	ENOG410XSIX(glutathione Stransferase)	sp|P32110|GSTX6_SOYBN(Probable glutathione S-transferase OS=Glycine max OX=3847 GN=HSP26-A PE=2 SV=1)	PF02798(GST_N:Glutathione S-transferase, N-terminal domain); PF13417(GST_N_3:Glutathione S-transferase, N-terminal domain); PF13409(GST_N_2:Glutathione S-transferase, N-terminal domain); PF00043(GST_C:Glutathione S-transferase, C-terminal domain); PF17172(GST_N_4:Glutathione S-transferase N-terminal domain); PF13410(GST_C_2:Glutathione S-transferase, C-terminal domain)
TRINITY_DN69152_c0_g1	Cluster 6		52.5979	5.71693	0.000290883	0.00592817	yes	up
TRINITY_DN61855_c0_g1	Cluster 6	hypothetical protein PHYPA_024091, partial [Physcomitrella patens]	50.7299	5.66476	0.00029155	0.00593578	yes	up	GO:0004013(molecular_function:adenosylhomocysteinase activity); GO:0033353(biological_process:S-adenosylmethionine cycle); GO:0005829(cellular_component:cytosol); GO:0006730(biological_process:one-carbon metabolic process)	K01251	E3.3.1.1, ahcY	map00270(Cysteine and methionine metabolism)	COG0499(L:Replication, recombination and repair)	COG0499(Retrotransposon protein)	sp|P93253|SAHH_MESCR(Adenosylhomocysteinase OS=Mesembryanthemum crystallinum OX=3544 GN=SAHH PE=2 SV=1)	PF00670(AdoHcyase_NAD:S-adenosyl-L-homocysteine hydrolase, NAD binding domain); PF05221(AdoHcyase:S-adenosyl-L-homocysteine hydrolase); PF02826(2-Hacid_dh_C:D-isomer specific 2-hydroxyacid dehydrogenase, NAD binding domain); PF07991(IlvN:Acetohydroxy acid isomeroreductase, NADPH-binding domain); PF02254(TrkA_N:TrkA-N domain)
TRINITY_DN119_c0_g2	Cluster 6		6.29294	2.65373	0.000324561	0.00648727	yes	up
TRINITY_DN40735_c0_g1	Cluster 6	UDP-glycosyltransferase 85A3 [Selaginella moellendorffii]	2.29805	1.20041	0.000349063	0.00688739	yes	up	GO:0016758(molecular_function:transferase activity, transferring hexosyl groups)				COG1819(S:Function unknown)	COG1819(Transferase)	sp|Q6VAA9|U73E1_STERE(UDP-glycosyltransferase 73E1 OS=Stevia rebaudiana OX=55670 GN=UGT73E1 PE=2 SV=1)	PF00201(UDPGT:UDP-glucoronosyl and UDP-glucosyl transferase)
TRINITY_DN11929_c1_g1	Cluster 6	glutathione S-transferase U19-like [Selaginella moellendorffii]	2.68942	1.42729	0.000351029	0.00692038	yes	up		K00799	GST, gst	map00480(Glutathione metabolism)	ENOG410XSIX(O:Posttranslational modification, protein turnover, chaperones)	ENOG410XSIX(glutathione Stransferase)	sp|P25317|GSTXA_TOBAC(Probable glutathione S-transferase parA OS=Nicotiana tabacum OX=4097 GN=PARA PE=2 SV=1)	PF02798(GST_N:Glutathione S-transferase, N-terminal domain); PF00043(GST_C:Glutathione S-transferase, C-terminal domain); PF13417(GST_N_3:Glutathione S-transferase, N-terminal domain); PF13410(GST_C_2:Glutathione S-transferase, C-terminal domain); PF13409(GST_N_2:Glutathione S-transferase, N-terminal domain); PF14497(GST_C_3:Glutathione S-transferase, C-terminal domain)
TRINITY_DN4026_c1_g1	Cluster 6		2.13606	1.09495	0.000353933	0.00696792	yes	up
TRINITY_DN16415_c0_g1	Cluster 6		50.5551	5.65978	0.000363441	0.00712136	yes	up
TRINITY_DN67791_c0_g1	Cluster 6	60S ribosomal protein L30 [Selaginella moellendorffii]	58.3202	5.86592	0.000372085	0.00725053	yes	up	GO:0003735(molecular_function:structural constituent of ribosome); GO:0005840(cellular_component:ribosome); GO:0003723(molecular_function:RNA binding); GO:0022625(cellular_component:cytosolic large ribosomal subunit)	K02908	RP-L30e, RPL30	map03010(Ribosome)	COG1911(L:Replication, recombination and repair)	COG1911(Retrotransposon protein)	sp|Q9M5M6|RL30_EUPES(60S ribosomal protein L30 OS=Euphorbia esula OX=3993 GN=RPL30 PE=3 SV=1)	PF01248(Ribosomal_L7Ae:Ribosomal protein L7Ae/L30e/S12e/Gadd45 family)
TRINITY_DN30100_c0_g2	Cluster 6	guanosine nucleotide diphosphate dissociation inhibitor 1 [Selaginella moellendorffii]	2.62055	1.38987	0.000400162	0.00769275	yes	up	GO:0018344(biological_process:protein geranylgeranylation); GO:0005092(molecular_function:GDP-dissociation inhibitor activity); GO:0005093(molecular_function:Rab GDP-dissociation inhibitor activity); GO:0006886(biological_process:intracellular protein transport); GO:0005096(molecular_function:GTPase activator activity); GO:0017137(molecular_function:Rab GTPase binding); GO:0015031(biological_proc…	K17255	GDI1_2		COG5044(O:Posttranslational modification, protein turnover, chaperones)	COG5044(GDP dissociation inhibitor)	sp|Q9LXC0|GDI_ARATH(Guanosine nucleotide diphosphate dissociation inhibitor At5g09550 OS=Arabidopsis thaliana OX=3702 GN=At5g09550 PE=3 SV=1)	PF00996(GDI:GDP dissociation inhibitor)
TRINITY_DN61538_c0_g4	Cluster 6	hypothetical protein AXG93_1040s1360 [Marchantia polymorpha subsp. ruderalis]	52.4686	5.71338	0.000406436	0.0077931	yes	up	GO:0003924(molecular_function:GTPase activity); GO:0005525(molecular_function:GTP binding)	K03234	EEF2		COG0480(L:Replication, recombination and repair)	COG0480(DNA polymerase)	sp|A0SXL6|EF2_CALJA(Elongation factor 2 OS=Callithrix jacchus OX=9483 GN=EEF2 PE=2 SV=1)	PF03764(EFG_IV:Elongation factor G, domain IV); PF00679(EFG_C:Elongation factor G C-terminus)
TRINITY_DN83033_c0_g1	Cluster 6		46.9156	5.55199	0.000410795	0.00786601	yes	up
TRINITY_DN15740_c0_g2	Cluster 6		6.80435	2.76646	0.000413553	0.00791023	yes	up							sp|P0C2F6|RNHX1_ARATH(Putative ribonuclease H protein At1g65750 OS=Arabidopsis thaliana OX=3702 GN=At1g65750 PE=3 SV=1)	PF13456(RVT_3:Reverse transcriptase-like); PF13966(zf-RVT:zinc-binding in reverse transcriptase)
TRINITY_DN22105_c0_g1	Cluster 6		7.50702	2.90824	0.000448299	0.00844545	yes	up					ENOG410YZWQ(S:Function unknown)	ENOG410YZWQ(-)	sp|Q9FFJ8|LIMYB_ARATH(L10-interacting MYB domain-containing protein OS=Arabidopsis thaliana OX=3702 GN=LIMYB PE=1 SV=1)	PF12776(Myb_DNA-bind_3:Myb/SANT-like DNA-binding domain)
TRINITY_DN17971_c0_g1	Cluster 6	putative somatic embryogenesis receptor kinase [Adiantum capillus-veneris]	3.39853	1.76491	0.000500012	0.00924609	yes	up	GO:0004675(molecular_function:transmembrane receptor protein serine/threonine kinase activity); GO:0005102(molecular_function:receptor binding); GO:0016021(cellular_component:integral component of membrane); GO:0005524(molecular_function:ATP binding)	K13418	SERK1		ENOG411233U(T:Signal transduction mechanisms); ENOG410ZNK7(T:Signal transduction mechanisms)	ENOG411233U(receptor kinase); ENOG410ZNK7(Somatic embryogenesis receptor kinase)	sp|Q7XV05|SERK2_ORYSJ(LRR receptor kinase SERK2 OS=Oryza sativa subsp. japonica OX=39947 GN=SERK2 PE=1 SV=1)	PF08263(LRRNT_2:Leucine rich repeat N-terminal domain)
TRINITY_DN84310_c0_g1	Cluster 6	hypothetical protein AXG93_700s1060 [Marchantia polymorpha subsp. ruderalis]	48.4814	5.59936	0.00051183	0.00943009	yes	up	GO:0003735(molecular_function:structural constituent of ribosome); GO:0006412(biological_process:translation); GO:0005840(cellular_component:ribosome)	K02962	RP-S17e, RPS17	map03010(Ribosome)	COG1383(L:Replication, recombination and repair)	COG1383(Tkp5 protein)	sp|Q9SJ36|RS172_ARATH(40S ribosomal protein S17-2 OS=Arabidopsis thaliana OX=3702 GN=RPS17B PE=2 SV=3)	PF00833(Ribosomal_S17e:Ribosomal S17)
TRINITY_DN88706_c0_g1	Cluster 6	nascent polypeptide-associated complex subunit beta-like [Physcomitrella patens]	44.8716	5.48773	0.000526155	0.00963871	yes	up		K01527	EGD1, BTF3		ENOG4111JBG(K:Transcription)	ENOG4111JBG(Component of the nascent polypeptide-associated complex (NAC), a dynamic component of the ribosomal exit tunnel, protecting the emerging polypeptides from interaction with other cytoplasmic proteins to ensure appropriate nascent protein targeting (By similarity). The NAC complex also promotes mitochondrial protein import by enhancing productive ribosome interactions with the outer mit…	sp|A1CMP1|NACB_ASPCL(Nascent polypeptide-associated complex subunit beta OS=Aspergillus clavatus (strain ATCC 1007 / CBS 513.65 / DSM 816 / NCTC 3887 / NRRL 1) OX=344612 GN=egd1 PE=3 SV=1)	PF01849(NAC:NAC domain)
TRINITY_DN35866_c0_g2	Cluster 6		44.8716	5.48773	0.000526155	0.00963871	yes	up
TRINITY_DN48323_c0_g4	Cluster 6	hypothetical protein AXG93_1429s1030 [Marchantia polymorpha subsp. ruderalis]	3.30481	1.72457	0.000547995	0.00998186	yes	up							sp|P0C2F6|RNHX1_ARATH(Putative ribonuclease H protein At1g65750 OS=Arabidopsis thaliana OX=3702 GN=At1g65750 PE=3 SV=1)
TRINITY_DN57426_c1_g4	Cluster 6		8.29024	3.05141	0.000597953	0.0107533	yes	up
TRINITY_DN78282_c0_g1	Cluster 6	40S ribosomal protein S9-2-like [Adiantum reniforme var. sinense]	44.7037	5.48232	0.000601419	0.0108061	yes	up	GO:0015935(cellular_component:small ribosomal subunit); GO:0045903(biological_process:positive regulation of translational fidelity); GO:0019843(molecular_function:rRNA binding); GO:0003735(molecular_function:structural constituent of ribosome); GO:0006412(biological_process:translation); GO:0022627(cellular_component:cytosolic small ribosomal subunit)	K02997	RP-S9e, RPS9	map03010(Ribosome)	COG0522(S:Function unknown)	COG0522(Aminotransferase-like, plant mobile domain family protein)	sp|Q9LXG1|RS91_ARATH(40S ribosomal protein S9-1 OS=Arabidopsis thaliana OX=3702 GN=RPS9B PE=1 SV=1)	PF01479(S4:S4 domain); PF00163(Ribosomal_S4:Ribosomal protein S4/S9 N-terminal domain)
TRINITY_DN80266_c0_g1	Cluster 6	hypothetical protein AXG93_1992s1010 [Marchantia polymorpha subsp. ruderalis]	2.47402	1.30686	0.0006492	0.0115195	yes	up	GO:0046983(molecular_function:protein dimerization activity)				ENOG410YG6S(S:Function unknown)	ENOG410YG6S(-)	sp|Q9T072|BH025_ARATH(Transcription factor bHLH25 OS=Arabidopsis thaliana OX=3702 GN=BHLH25 PE=2 SV=2)	PF00010(HLH:Helix-loop-helix DNA-binding domain)
TRINITY_DN85218_c0_g1	Cluster 6	hypothetical protein SELMODRAFT_129710 [Selaginella moellendorffii]	3.50527	1.80953	0.000653821	0.0115927	yes	up	GO:0016021(cellular_component:integral component of membrane); GO:0016020(cellular_component:membrane)				ENOG410YDIX(S:Function unknown)	ENOG410YDIX(Sequestosome 1)	sp|Q65XS5|BC10_ORYSJ(Glycosyltransferase BC10 OS=Oryza sativa subsp. japonica OX=39947 GN=BC10 PE=1 SV=1)	PF02485(Branch:Core-2/I-Branching enzyme)
TRINITY_DN8224_c0_g2	Cluster 6		31.5575	4.97991	0.00067925	0.0119655	yes	up
TRINITY_DN13301_c0_g3	Cluster 6		32.5346	5.0239	0.000688953	0.0120912	yes	up
TRINITY_DN33625_c0_g1	Cluster 6	hypothetical protein AXG93_2415s1640 [Marchantia polymorpha subsp. ruderalis]	32.3389	5.0152	0.000691635	0.0121323	yes	up	GO:0016655(molecular_function:oxidoreductase activity, acting on NAD(P)H, quinone or similar compound as acceptor); GO:0005886(cellular_component:plasma membrane); GO:0003924(molecular_function:GTPase activity); GO:0005525(molecular_function:GTP binding)	K17065	DNM1L		COG0699(L:Replication, recombination and repair)	COG0699(Retrotransposon protein)	sp|Q8LFT2|DRP3B_ARATH(Dynamin-related protein 3B OS=Arabidopsis thaliana OX=3702 GN=DRP3B PE=1 SV=2)
TRINITY_DN28587_c0_g4	Cluster 6		6.77132	2.75944	0.000706214	0.012336	yes	up
TRINITY_DN86505_c0_g1	Cluster 6	60S ribosomal protein L17-like [Physcomitrella patens]	48.5325	5.60088	0.000718474	0.0125068	yes	up	GO:0003735(molecular_function:structural constituent of ribosome); GO:0002181(biological_process:cytoplasmic translation); GO:0015934(cellular_component:large ribosomal subunit); GO:0006412(biological_process:translation); GO:0022625(cellular_component:cytosolic large ribosomal subunit)	K02880	RP-L17e, RPL17	map03010(Ribosome)	COG0091(J:Translation, ribosomal structure and biogenesis)	COG0091(The globular domain of the protein is located near the polypeptide exit tunnel on the outside of the subunit, while an extended beta-hairpin is found that lines the wall of the exit tunnel in the center of the 70S ribosome (By similarity))	sp|Q93VI3|RL171_ARATH(60S ribosomal protein L17-1 OS=Arabidopsis thaliana OX=3702 GN=RPL17A PE=2 SV=1)	PF00237(Ribosomal_L22:Ribosomal protein L22p/L17e)
TRINITY_DN35906_c0_g1	Cluster 6	60S ribosomal protein L23A-like [Physcomitrella patens]	44.6103	5.4793	0.000726645	0.0126118	yes	up	GO:0003735(molecular_function:structural constituent of ribosome); GO:0006412(biological_process:translation); GO:0005840(cellular_component:ribosome)	K02893	RP-L23Ae, RPL23A	map03010(Ribosome)	COG0089(S:Function unknown)	COG0089(Retrotransposon protein)	sp|Q07761|RL23A_TOBAC(60S ribosomal protein L23a OS=Nicotiana tabacum OX=4097 GN=RPL23A PE=2 SV=1)	PF03939(Ribosomal_L23eN:Ribosomal protein L23, N-terminal domain); PF00276(Ribosomal_L23:Ribosomal protein L23)
TRINITY_DN18279_c0_g1	Cluster 6	myb-related protein 308, partial [Selaginella moellendorffii]	2.20073	1.13798	0.000729609	0.0126508	yes	up	GO:0003677(molecular_function:DNA binding)	K09422	MYBP		COG5147(K:Transcription)	COG5147(DNA-directed RNA Polymerase)	sp|Q10MB4|MYB2_ORYSJ(Transcription factor MYB2 OS=Oryza sativa subsp. japonica OX=39947 GN=MYB2 PE=2 SV=1)	PF00249(Myb_DNA-binding:Myb-like DNA-binding domain); PF13921(Myb_DNA-bind_6:Myb-like DNA-binding domain)
TRINITY_DN40708_c0_g1	Cluster 6		3.37607	1.75535	0.000741937	0.0128299	yes	up					COG0577(V:Defense mechanisms); ENOG410Y65V(S:Function unknown)	COG0577(ABC transporter (permease)); ENOG410Y65V(Retrotransposon protein)		PF13966(zf-RVT:zinc-binding in reverse transcriptase)
TRINITY_DN56132_c0_g3	Cluster 6		4.35499	2.12267	0.000743334	0.0128509	yes	up
TRINITY_DN92099_c0_g1	Cluster 6	hypothetical protein PHYPA_001207 [Physcomitrella patens]	46.4747	5.53838	0.000776631	0.013319	yes	up	GO:0003735(molecular_function:structural constituent of ribosome); GO:0005840(cellular_component:ribosome); GO:0022625(cellular_component:cytosolic large ribosomal subunit); GO:0003723(molecular_function:RNA binding); GO:0006412(biological_process:translation)	K02873	RP-L13e, RPL13	map03010(Ribosome)	COG4352(J:Translation, ribosomal structure and biogenesis)	COG4352(cytoplasmic translation)	sp|P41128|RL131_BRANA(60S ribosomal protein L13-1 OS=Brassica napus OX=3708 PE=2 SV=1)	PF01294(Ribosomal_L13e:Ribosomal protein L13e)
TRINITY_DN79029_c0_g2	Cluster 6		3.51802	1.81476	0.000780451	0.0133587	yes	up					ENOG410Z7Y9(S:Function unknown)	ENOG410Z7Y9(Potato type II proteinase inhibitor family)	sp|P83241|IP23_CAPAN(Proteinase inhibitor PSI-1.2 OS=Capsicum annuum OX=4072 PE=1 SV=1)	PF02428(Prot_inhib_II:Potato type II proteinase inhibitor family)
TRINITY_DN80084_c0_g2	Cluster 6		12.5196	3.64612	0.000783259	0.0133872	yes	up
TRINITY_DN35826_c0_g2	Cluster 6	carboxyl-terminal-processing peptidase 1, chloroplastic [Selaginella moellendorffii]	42.7636	5.41831	0.000786697	0.0134297	yes	up	GO:0031977(cellular_component:thylakoid lumen); GO:0008236(molecular_function:serine-type peptidase activity)	K03797	E3.4.21.102, prc, ctpA		COG0793(S:Function unknown)	COG0793(Retrotransposon protein)	sp|F4KHG6|CTPA1_ARATH(Carboxyl-terminal-processing peptidase 1, chloroplastic OS=Arabidopsis thaliana OX=3702 GN=CTPA1 PE=1 SV=1)
TRINITY_DN36223_c0_g3	Cluster 6		19.811	4.30823	0.000886026	0.014786	yes	up					ENOG41107VY(S:Function unknown)	ENOG41107VY(Retrotransposon gag protein)		PF03732(Retrotrans_gag:Retrotransposon gag protein)
TRINITY_DN10905_c0_g1	Cluster 6	CBL-interacting protein kinase 23 [Selaginella moellendorffii]	2.43144	1.28181	0.00090238	0.0150164	yes	up	GO:0004674(molecular_function:protein serine/threonine kinase activity); GO:0007165(biological_process:signal transduction); GO:0005524(molecular_function:ATP binding)	K07198	PRKAA, AMPK		COG0515(T:Signal transduction mechanisms)	COG0515(Serine Threonine protein kinase)	sp|Q8W1D5|CIPKP_ARATH(CBL-interacting serine/threonine-protein kinase 25 OS=Arabidopsis thaliana OX=3702 GN=CIPK25 PE=2 SV=1)	PF00069(Pkinase:Protein kinase domain); PF07714(PK_Tyr_Ser-Thr:Protein tyrosine and serine/threonine kinase); PF03822(NAF:NAF domain); PF14531(Kinase-like:Kinase-like); PF06293(Kdo:Lipopolysaccharide kinase (Kdo/WaaP) family); PF01163(RIO1:RIO1 family)
TRINITY_DN15242_c0_g5	Cluster 6		40.9121	5.35445	0.000932635	0.0154431	yes	up
TRINITY_DN3245_c0_g2	Cluster 6		2.08749	1.06177	0.00093321	0.0154431	yes	up
TRINITY_DN26849_c0_g2	Cluster 6		8.9569	3.163	0.000992859	0.0162378	yes	up
TRINITY_DN73320_c0_g1	Cluster 6		42.6435	5.41425	0.00100749	0.0164288	yes	up					ENOG410Z9QS(S:Function unknown); ENOG410Y65V(S:Function unknown)	ENOG410Z9QS(-); ENOG410Y65V(-)
TRINITY_DN20002_c0_g3	Cluster 6	protein DMR6-LIKE OXYGENASE 2 [Selaginella moellendorffii]	4.76706	2.2531	0.00104433	0.0169242	yes	up	GO:0046872(molecular_function:metal ion binding); GO:0051213(molecular_function:dioxygenase activity); GO:0016491(molecular_function:oxidoreductase activity)				COG3491(S:Function unknown)	COG3491(2OGFe(II) oxygenase)	sp|Q84MB3|ACCH1_ARATH(1-aminocyclopropane-1-carboxylate oxidase homolog 1 OS=Arabidopsis thaliana OX=3702 GN=At1g06620 PE=2 SV=1)	PF03171(2OG-FeII_Oxy:2OG-Fe(II) oxygenase superfamily); PF14226(DIOX_N:non-haem dioxygenase in morphine synthesis N-terminal)
TRINITY_DN56352_c0_g1	Cluster 6	germin-like protein 1-3 [Selaginella moellendorffii]	6.65891	2.73529	0.00112264	0.0179544	yes	up	GO:0048046(cellular_component:apoplast); GO:0005618(cellular_component:cell wall); GO:0030145(molecular_function:manganese ion binding); GO:0045735(molecular_function:nutrient reservoir activity)				ENOG410YKM8(S:Function unknown)	ENOG410YKM8(May play a role in plant defense. Probably has no oxalate oxidase activity even if the active site is conserved)	sp|Q9LMC9|GLT2_ARATH(Germin-like protein subfamily T member 2 OS=Arabidopsis thaliana OX=3702 GN=At1g18980 PE=2 SV=1)	PF00190(Cupin_1:Cupin); PF07883(Cupin_2:Cupin domain)
TRINITY_DN69227_c0_g1	Cluster 6		8.00313	3.00057	0.00118847	0.018765	yes	up
TRINITY_DN13066_c0_g2	Cluster 6		38.868	5.28051	0.00119196	0.0188034	yes	up
TRINITY_DN91311_c0_g1	Cluster 6	nascent polypeptide-associated complex subunit alpha-like protein 1 [Physcomitrella patens]	40.6023	5.34349	0.0011942	0.0188303	yes	up	GO:0005854(cellular_component:nascent polypeptide-associated complex)	K03626	EGD2, NACA		COG1308(S:Function unknown)	COG1308(Retrotransposon protein)	sp|Q9M612|NACA_PINTA(Nascent polypeptide-associated complex subunit alpha-like protein OS=Pinus taeda OX=3352 PE=2 SV=1)	PF01849(NAC:NAC domain)
TRINITY_DN30171_c0_g1	Cluster 6	L-type lectin-domain containing receptor kinase VIII.1-like [Selaginella moellendorffii]	2.88031	1.52622	0.00122326	0.01919	yes	up	GO:0004674(molecular_function:protein serine/threonine kinase activity); GO:0016021(cellular_component:integral component of membrane); GO:0030246(molecular_function:carbohydrate binding); GO:0005524(molecular_function:ATP binding); GO:0004672(molecular_function:protein kinase activity)				COG0515(T:Signal transduction mechanisms)	COG0515(Serine Threonine protein kinase)	sp|Q9FG33|LRKS5_ARATH(Probable L-type lectin-domain containing receptor kinase S.5 OS=Arabidopsis thaliana OX=3702 GN=LECRKS5 PE=2 SV=1)	PF00139(Lectin_legB:Legume lectin domain); PF00069(Pkinase:Protein kinase domain); PF07714(PK_Tyr_Ser-Thr:Protein tyrosine and serine/threonine kinase)
TRINITY_DN92895_c0_g1	Cluster 6	60S ribosomal protein L7a-2-like [Physcomitrella patens]	42.4692	5.40835	0.00122951	0.0192539	yes	up	GO:0042254(biological_process:ribosome biogenesis); GO:0022625(cellular_component:cytosolic large ribosomal subunit); GO:1990904(cellular_component:ribonucleoprotein complex); GO:0003723(molecular_function:RNA binding); GO:0000470(biological_process:maturation of LSU-rRNA)	K02936	RP-L7Ae, RPL7A	map03010(Ribosome)	COG1358(J:Translation, ribosomal structure and biogenesis)	COG1358(Located at the top of the head of the 30S subunit, it contacts several helices of the 16S rRNA. In the 70S ribosome it contacts the 23S rRNA (bridge B1a) and protein L5 of the 50S subunit (bridge B1b), connecting the 2 subunits)	sp|Q9LZH9|RL7A2_ARATH(60S ribosomal protein L7a-2 OS=Arabidopsis thaliana OX=3702 GN=RPL7AB PE=2 SV=1)	PF01248(Ribosomal_L7Ae:Ribosomal protein L7Ae/L30e/S12e/Gadd45 family)
TRINITY_DN28664_c0_g1	Cluster 6		2.53864	1.34406	0.00130409	0.0202112	yes	up
TRINITY_DN45967_c1_g1	Cluster 6		2.90098	1.53654	0.00131333	0.0203406	yes	up
TRINITY_DN8861_c0_g2	Cluster 6		6.69299	2.74265	0.00131417	0.0203452	yes	up
TRINITY_DN31227_c0_g3	Cluster 6		38.7535	5.27626	0.00134864	0.0207697	yes	up
TRINITY_DN2881_c2_g1	Cluster 6		2.07313	1.05181	0.00138378	0.0212183	yes	up
TRINITY_DN46402_c0_g1	Cluster 6		3.52862	1.8191	0.00149495	0.0224982	yes	up
TRINITY_DN35559_c0_g1	Cluster 6	40S ribosomal protein S14-3 [Selaginella moellendorffii]	38.5854	5.26998	0.00152403	0.0228337	yes	up	GO:0003735(molecular_function:structural constituent of ribosome); GO:0019843(molecular_function:rRNA binding); GO:0006412(biological_process:translation); GO:0009507(cellular_component:chloroplast); GO:0005840(cellular_component:ribosome)	K02955	RP-S14e, RPS14	map03010(Ribosome)	COG0100(D:Cell cycle control, cell division, chromosome partitioning); COG0100(O:Posttranslational modification, protein turnover, chaperones)	COG0100(complex subunit 10); COG0100(complex subunit 10)	sp|P46295|RS14_CHLRE(40S ribosomal protein S14 OS=Chlamydomonas reinhardtii OX=3055 GN=RPS14 PE=3 SV=1)	PF00411(Ribosomal_S11:Ribosomal protein S11)
TRINITY_DN65364_c0_g3	Cluster 6		38.5332	5.26803	0.00153053	0.0229164	yes	up
TRINITY_DN17281_c1_g1	Cluster 6		38.5058	5.267	0.00160162	0.0237294	yes	up
TRINITY_DN27437_c0_g1	Cluster 6		3.13203	1.6471	0.00162343	0.0240022	yes	up
TRINITY_DN58218_c0_g1	Cluster 6	hypothetical protein MARPO_0014s0135 [Marchantia polymorpha]	38.4773	5.26594	0.00172579	0.0251328	yes	up	GO:0003824(molecular_function:catalytic activity)				COG0318(I:Lipid transport and metabolism); COG0318(Q:Secondary metabolites biosynthesis, transport and catabolism)	COG0318(Amp-dependent synthetase and ligase); COG0318(Amp-dependent synthetase and ligase)	sp|F4HUK6|AAE1_ARATH(Probable acyl-activating enzyme 1, peroxisomal OS=Arabidopsis thaliana OX=3702 GN=AAE1 PE=2 SV=1)	PF00501(AMP-binding:AMP-binding enzyme)
TRINITY_DN23302_c0_g4	Cluster 6		36.71	5.1981	0.00172622	0.0251328	yes	up
TRINITY_DN61599_c1_g1	Cluster 6	hypothetical protein AXG93_3042s1030 [Marchantia polymorpha subsp. ruderalis]	29.9378	4.90389	0.00175003	0.025414	yes	up	GO:0005737(cellular_component:cytoplasm); GO:0007017(biological_process:microtubule-based process); GO:0000278(biological_process:mitotic cell cycle); GO:0003924(molecular_function:GTPase activity); GO:0005200(molecular_function:structural constituent of cytoskeleton); GO:0000226(biological_process:microtubule cytoskeleton organization); GO:0005874(cellular_component:microtubule); GO:0005525(mole…	K07374	TUBA	map04145(Phagosome)	COG5023(Z:Cytoskeleton)	COG5023(protein polymerization)	sp|Q8T6A5|TBA1_APLCA(Tubulin alpha-1 chain OS=Aplysia californica OX=6500 PE=2 SV=1)	PF03953(Tubulin_C:Tubulin C-terminal domain)
TRINITY_DN17189_c0_g1	Cluster 6		26.2342	4.71338	0.00176623	0.0255888	yes	up
TRINITY_DN27508_c0_g2	Cluster 6	uncharacterized protein LOC112343504 [Selaginella moellendorffii]	8.86155	3.14756	0.00177314	0.0256606	yes	up								PF00385(Chromo:Chromo (CHRromatin Organisation MOdifier) domain)
TRINITY_DN14603_c1_g1	Cluster 6	uncharacterized protein LOC112350597 [Selaginella moellendorffii]	2.31549	1.21131	0.00179985	0.0259429	yes	up	GO:0004674(molecular_function:protein serine/threonine kinase activity); GO:0016021(cellular_component:integral component of membrane); GO:0030246(molecular_function:carbohydrate binding); GO:0005524(molecular_function:ATP binding); GO:0048544(biological_process:recognition of pollen)				COG0515(T:Signal transduction mechanisms)	COG0515(Serine Threonine protein kinase)	sp|P17801|KPRO_MAIZE(Putative receptor protein kinase ZmPK1 OS=Zea mays OX=4577 GN=PK1 PE=2 SV=2)	PF00069(Pkinase:Protein kinase domain); PF07714(PK_Tyr_Ser-Thr:Protein tyrosine and serine/threonine kinase); PF08276(PAN_2:PAN-like domain); PF00024(PAN_1:PAN domain); PF14295(PAN_4:PAN domain)
TRINITY_DN45171_c0_g1	Cluster 6		4.64239	2.21487	0.00181625	0.0261272	yes	up								PF00646(F-box:F-box domain)
TRINITY_DN78649_c0_g1	Cluster 6	60S ribosomal protein L21-2-like [Physcomitrella patens]	42.1497	5.39745	0.00183873	0.0263742	yes	up	GO:0003735(molecular_function:structural constituent of ribosome); GO:0006412(biological_process:translation); GO:0005840(cellular_component:ribosome)	K02889	RP-L21e, RPL21	map03010(Ribosome)	COG2139(J:Translation, ribosomal structure and biogenesis)	COG2139((ribosomal) protein)	sp|O82574|RL21_CYAPA(60S ribosomal protein L21 OS=Cyanophora paradoxa OX=2762 GN=RPL21 PE=2 SV=1)	PF01157(Ribosomal_L21e:Ribosomal protein L21e)
TRINITY_DN32350_c0_g2	Cluster 6		3.18771	1.67252	0.00188427	0.0268908	yes	up		K01602	rbcS	map00630(Glyoxylate and dicarboxylate metabolism); map00710(Carbon fixation in photosynthetic organisms)	COG4451(C:Energy production and conversion)	COG4451(RuBisCO catalyzes two reactions the carboxylation of D- ribulose 1,5-bisphosphate, the primary event in carbon dioxide fixation, as well as the oxidative fragmentation of the pentose substrate. Both reactions occur simultaneously and in competition at the same active site)	sp|Q08183|RBS3_MESCR(Ribulose bisphosphate carboxylase small chain 3, chloroplastic OS=Mesembryanthemum crystallinum OX=3544 GN=RBCS-3 PE=2 SV=1)
TRINITY_DN77950_c0_g1	Cluster 6	eukaryotic translation initiation factor 5A-2 [Physcomitrella patens]	38.4476	5.26482	0.00192455	0.0273553	yes	up	GO:0045905(biological_process:positive regulation of translational termination); GO:0003746(molecular_function:translation elongation factor activity); GO:0043022(molecular_function:ribosome binding); GO:0045901(biological_process:positive regulation of translational elongation); GO:0006452(biological_process:translational frameshifting)	K03263	EIF5A		COG0231(J:Translation, ribosomal structure and biogenesis)	COG0231(Involved in peptide bond synthesis. Stimulates efficient translation and peptide-bond synthesis on native or reconstituted 70S ribosomes in vitro. Probably functions indirectly by altering the affinity of the ribosome for aminoacyl-tRNA, thus increasing their reactivity as acceptors for peptidyl transferase (By similarity))	sp|Q9AXQ5|IF5A2_SOLLC(Eukaryotic translation initiation factor 5A-2 OS=Solanum lycopersicum OX=4081 PE=2 SV=1)	PF01287(eIF-5a:Eukaryotic elongation factor 5A hypusine, DNA-binding OB fold)
TRINITY_DN45823_c0_g3	Cluster 6		38.3587	5.26148	0.00193496	0.0274867	yes	up
TRINITY_DN65960_c0_g1	Cluster 6	phosphatidylinositol:ceramide inositolphosphotransferase [Selaginella moellendorffii]	3.61913	1.85564	0.00197289	0.0279412	yes	up	GO:0016021(cellular_component:integral component of membrane)	K22697	SAMD8		ENOG410XNSC(S:Function unknown)	ENOG410XNSC(sphingomyelin synthase)	sp|B8ACH9|IPCS_ORYSI(Phosphatidylinositol:ceramide inositolphosphotransferase OS=Oryza sativa subsp. indica OX=39946 GN=ERH1 PE=3 SV=1)	PF14360(PAP2_C:PAP2 superfamily C-terminal)
TRINITY_DN13887_c0_g4	Cluster 6		38.4629	5.2654	0.00200936	0.028344	yes	up
TRINITY_DN84092_c0_g2	Cluster 6		36.5152	5.19043	0.00204456	0.0286631	yes	up
TRINITY_DN50152_c0_g1	Cluster 6	60S ribosomal protein L7-2-like [Physcomitrella patens]	36.5152	5.19043	0.00204456	0.0286631	yes	up	GO:0003735(molecular_function:structural constituent of ribosome); GO:0000463(biological_process:maturation of LSU-rRNA from tricistronic rRNA transcript (SSU-rRNA, 5.8S rRNA, LSU-rRNA)); GO:0022625(cellular_component:cytosolic large ribosomal subunit)	K02937	RP-L7e, RPL7	map03010(Ribosome)	COG1841(O:Posttranslational modification, protein turnover, chaperones)	COG1841(beta SUBUNIT)	sp|Q9LHP1|RL74_ARATH(60S ribosomal protein L7-4 OS=Arabidopsis thaliana OX=3702 GN=RPL7D PE=2 SV=1)	PF00327(Ribosomal_L30:Ribosomal protein L30p/L7e); PF08079(Ribosomal_L30_N:Ribosomal L30 N-terminal domain)
TRINITY_DN24609_c0_g1	Cluster 6		6.0193	2.5896	0.00205724	0.0287729	yes	up
TRINITY_DN69412_c0_g1	Cluster 6	hypothetical protein AXG93_3296s1030 [Marchantia polymorpha subsp. ruderalis]	2.03069	1.02197	0.00205727	0.0287729	yes	up					ENOG410YVTQ(S:Function unknown)	ENOG410YVTQ(CONTAINS InterPro DOMAIN s Cyclin-like F-box (InterPro IPR001810), F-box associated (InterPro IPR006527), F-box associated type 1 (InterPro IPR017451))	sp|Q9SU30|CPR1_ARATH(F-box protein CPR1 OS=Arabidopsis thaliana OX=3702 GN=CPR1 PE=1 SV=2)	PF00646(F-box:F-box domain); PF12937(F-box-like:F-box-like)
TRINITY_DN26680_c1_g4	Cluster 6		3.6935	1.88499	0.0021923	0.0302896	yes	up
TRINITY_DN48994_c0_g1	Cluster 6		4.03414	2.01226	0.00228999	0.0313695	yes	up
TRINITY_DN92053_c0_g1	Cluster 6	40S ribosomal protein S19-1 [Selaginella moellendorffii]	40.2258	5.33005	0.00229253	0.0313739	yes	up	GO:0000028(biological_process:ribosomal small subunit assembly); GO:0022627(cellular_component:cytosolic small ribosomal subunit); GO:0003735(molecular_function:structural constituent of ribosome); GO:0003723(molecular_function:RNA binding); GO:0006412(biological_process:translation); GO:0005840(cellular_component:ribosome)	K02966	RP-S19e, RPS19	map03010(Ribosome)	COG2238(O:Posttranslational modification, protein turnover, chaperones)	COG2238(ubiquitin-dependent protein catabolic process)	sp|P58234|RS19A_SCHPO(40S ribosomal protein S19-A OS=Schizosaccharomyces pombe (strain 972 / ATCC 24843) OX=284812 GN=rps1901 PE=2 SV=1)	PF01090(Ribosomal_S19e:Ribosomal protein S19e)
TRINITY_DN88179_c0_g1	Cluster 6	hypothetical protein MARPO_0075s0021 [Marchantia polymorpha]	40.2258	5.33005	0.00229253	0.0313739	yes	up	GO:0016021(cellular_component:integral component of membrane); GO:0045485(molecular_function:omega-6 fatty acid desaturase activity); GO:0006629(biological_process:lipid metabolic process); GO:0016717(molecular_function:oxidoreductase activity, acting on paired donors, with oxidation of a pair of donors resulting in the reduction of molecular oxygen to two molecules of water)	K10256	FAD2	map01040(Biosynthesis of unsaturated fatty acids)	COG3239(J:Translation, ribosomal structure and biogenesis)	COG3239(This is 1 of the proteins that binds and probably mediates the attachment of the 5S RNA into the large ribosomal subunit, where it forms part of the central protuberance. In the 70S ribosome it contacts protein S13 of the 30S subunit (bridge B1b), connecting the 2 subunits)	sp|Q9Y8H5|FAD12_MORAP(Delta(12) fatty acid desaturase OS=Mortierella alpina OX=64518 PE=1 SV=2)	PF00487(FA_desaturase:Fatty acid desaturase)
TRINITY_DN3675_c0_g1	Cluster 6		2.08999	1.0635	0.00229929	0.0314267	yes	up		K00434	E1.11.1.11	map00480(Glutathione metabolism); map00053(Ascorbate and aldarate metabolism)
TRINITY_DN82565_c0_g1	Cluster 6	NIMA-related protein kinase [Physcomitrella patens]	25.2232	4.65668	0.00231145	0.0315784	yes	up	GO:0005524(molecular_function:ATP binding); GO:0004672(molecular_function:protein kinase activity)	K08857	NEK1_4_5		ENOG410Y7JF(L:Replication, recombination and repair)	ENOG410Y7JF(DNA polymerase)	sp|Q0WPH8|NEK5_ARATH(Serine/threonine-protein kinase Nek5 OS=Arabidopsis thaliana OX=3702 GN=NEK5 PE=1 SV=1)
TRINITY_DN64467_c0_g1	Cluster 6		34.6916	5.11651	0.00232468	0.0317156	yes	up
TRINITY_DN50290_c0_g1	Cluster 6	60S ribosomal protein L14-1-like [Physcomitrella patens]	40.3224	5.33351	0.0023408	0.0318862	yes	up	GO:0003735(molecular_function:structural constituent of ribosome); GO:0005840(cellular_component:ribosome); GO:0003723(molecular_function:RNA binding); GO:0006412(biological_process:translation)	K02875	RP-L14e, RPL14	map03010(Ribosome)	COG2163(J:Translation, ribosomal structure and biogenesis)	COG2163((ribosomal) protein)	sp|Q9CR57|RL14_MOUSE(60S ribosomal protein L14 OS=Mus musculus OX=10090 GN=Rpl14 PE=1 SV=3)	PF01929(Ribosomal_L14e:Ribosomal protein L14); PF00467(KOW:KOW motif)
TRINITY_DN67520_c0_g1	Cluster 6	glyceraldehyde-3-phosphate dehydrogenase [Marchantia polymorpha]	36.3959	5.1857	0.00242522	0.0328023	yes	up	GO:0051287(molecular_function:NAD binding); GO:0050661(molecular_function:NADP binding); GO:0006006(biological_process:glucose metabolic process); GO:0016620(molecular_function:oxidoreductase activity, acting on the aldehyde or oxo group of donors, NAD or NADP as acceptor)	K05298	GAPA	map00710(Carbon fixation in photosynthetic organisms)	COG0057(U:Intracellular trafficking, secretion, and vesicular transport)	COG0057(transmembrane transport)	sp|P50362|G3PA_CHLRE(Glyceraldehyde-3-phosphate dehydrogenase A, chloroplastic OS=Chlamydomonas reinhardtii OX=3055 GN=GAPA PE=1 SV=1)	PF02800(Gp_dh_C:Glyceraldehyde 3-phosphate dehydrogenase, C-terminal domain)
TRINITY_DN91219_c0_g1	Cluster 6		36.3959	5.1857	0.00242522	0.0328023	yes	up
TRINITY_DN33230_c0_g1	Cluster 6	UDP-glycosyltransferase 72B1-like [Physcomitrella patens]	2.27805	1.1878	0.00244859	0.0330298	yes	up	GO:0016758(molecular_function:transferase activity, transferring hexosyl groups)	K23260	TOGT1	map00940(Phenylpropanoid biosynthesis)	COG1819(S:Function unknown)	COG1819(Transferase)	sp|Q9AT54|SCGT_TOBAC(Scopoletin glucosyltransferase OS=Nicotiana tabacum OX=4097 GN=TOGT1 PE=1 SV=1)	PF00201(UDPGT:UDP-glucoronosyl and UDP-glucosyl transferase)
TRINITY_DN63934_c0_g2	Cluster 6		8.98993	3.16831	0.00250258	0.0335174	yes	up
TRINITY_DN26631_c0_g1	Cluster 6		2.61632	1.38754	0.00261018	0.0346473	yes	up
TRINITY_DN19550_c0_g1	Cluster 6		3.32637	1.73395	0.00273631	0.0359301	yes	up
TRINITY_DN27040_c2_g4	Cluster 6		24.1868	4.59615	0.00274921	0.0360726	yes	up					COG0417(L:Replication, recombination and repair); ENOG410XWAR(S:Function unknown)	COG0417(DNA polymerase); ENOG410XWAR(WD and tetratricopeptide repeats)
TRINITY_DN86994_c0_g1	Cluster 6	60S ribosomal protein L26-1-like [Physcomitrella patens]	38.2827	5.25862	0.00275639	0.0361533	yes	up	GO:0042273(biological_process:ribosomal large subunit biogenesis); GO:0015934(cellular_component:large ribosomal subunit); GO:0022625(cellular_component:cytosolic large ribosomal subunit); GO:0003735(molecular_function:structural constituent of ribosome); GO:0003723(molecular_function:RNA binding); GO:0002181(biological_process:cytoplasmic translation); GO:0006412(biological_process:translation)	K02898	RP-L26e, RPL26	map03010(Ribosome)	COG0198(K:Transcription)	COG0198(Transcription factor)	sp|Q9FJX2|RL262_ARATH(60S ribosomal protein L26-2 OS=Arabidopsis thaliana OX=3702 GN=RPL26B PE=2 SV=1)	PF16906(Ribosomal_L26:Ribosomal proteins L26 eukaryotic, L24P archaeal); PF00467(KOW:KOW motif)
TRINITY_DN17739_c0_g1	Cluster 6		2.64106	1.40112	0.00275809	0.0361622	yes	up					ENOG410YFJ1(S:Function unknown)	ENOG410YFJ1(expressed protein)		PF06880(DUF1262:Protein of unknown function (DUF1262))
TRINITY_DN37886_c0_g1	Cluster 6		11.0667	3.46816	0.00286993	0.0372964	yes	up
TRINITY_DN7795_c0_g1	Cluster 6	hypothetical protein SELMODRAFT_83967, partial [Selaginella moellendorffii]	2.34854	1.23176	0.00294181	0.0380207	yes	up	GO:0016491(molecular_function:oxidoreductase activity)	K15095	E1.1.1.208	map00902(Monoterpenoid biosynthesis)	COG1028(S:Function unknown)	COG1028(Dehydrogenase reductase)	sp|Q9M2E2|SDR1_ARATH((+)-neomenthol dehydrogenase OS=Arabidopsis thaliana OX=3702 GN=SDR1 PE=1 SV=1)	PF00106(adh_short:short chain dehydrogenase); PF13561(adh_short_C2:Enoyl-(Acyl carrier protein) reductase); PF08659(KR:KR domain); PF01370(Epimerase:NAD dependent epimerase/dehydratase family)
TRINITY_DN85858_c0_g1	Cluster 6		36.4957	5.18965	0.00294774	0.0380765	yes	up
TRINITY_DN30822_c0_g1	Cluster 6		24.1157	4.5919	0.00300323	0.0385887	yes	up
TRINITY_DN22521_c0_g1	Cluster 6		38.3326	5.2605	0.0030674	0.0392348	yes	up
TRINITY_DN47439_c0_g1	Cluster 6		2.74691	1.45781	0.00307751	0.0393285	yes	up
TRINITY_DN78997_c0_g1	Cluster 6		32.699	5.03117	0.00312587	0.0397954	yes	up
TRINITY_DN31349_c0_g1	Cluster 6	wall-associated receptor kinase 3 [Selaginella moellendorffii]	2.10594	1.07447	0.00313097	0.0398532	yes	up	GO:0016021(cellular_component:integral component of membrane); GO:0030247(molecular_function:polysaccharide binding); GO:0004674(molecular_function:protein serine/threonine kinase activity); GO:0005509(molecular_function:calcium ion binding); GO:0004672(molecular_function:protein kinase activity); GO:0005524(molecular_function:ATP binding)				COG0515(T:Signal transduction mechanisms)	COG0515(Serine Threonine protein kinase)	sp|Q7X8C5|WAKLB_ARATH(Wall-associated receptor kinase-like 2 OS=Arabidopsis thaliana OX=3702 GN=WAKL2 PE=2 SV=1)	PF00069(Pkinase:Protein kinase domain); PF07714(PK_Tyr_Ser-Thr:Protein tyrosine and serine/threonine kinase)
TRINITY_DN74919_c0_g2	Cluster 6	hypothetical protein AXG93_2752s1770 [Marchantia polymorpha subsp. ruderalis]	34.4054	5.10456	0.00315877	0.0401228	yes	up	GO:0015074(biological_process:DNA integration); GO:0003676(molecular_function:nucleic acid binding)						sp|Q99315|YG31B_YEAST(Transposon Ty3-G Gag-Pol polyprotein OS=Saccharomyces cerevisiae (strain ATCC 204508 / S288c) OX=559292 GN=TY3B-G PE=1 SV=3)
TRINITY_DN88775_c0_g1	Cluster 6		34.4385	5.10595	0.00347115	0.0431316	yes	up
TRINITY_DN73831_c0_g1	Cluster 6	ubiquitin-60S ribosomal protein L40 [Selaginella moellendorffii]	36.1874	5.17742	0.00347581	0.0431693	yes	up	GO:0003735(molecular_function:structural constituent of ribosome); GO:0006412(biological_process:translation); GO:0005840(cellular_component:ribosome)	K02927	RP-L40e, RPL40	map03010(Ribosome)	COG1552(Q:Secondary metabolites biosynthesis, transport and catabolism)	COG1552(isochorismatase)	sp|P0CH06|RL401_SCHPO(Ubiquitin-60S ribosomal protein L40 OS=Schizosaccharomyces pombe (strain 972 / ATCC 24843) OX=284812 GN=ubi1 PE=1 SV=1)	PF00240(ubiquitin:Ubiquitin family); PF01020(Ribosomal_L40e:Ribosomal L40e family); PF11976(Rad60-SLD:Ubiquitin-2 like Rad60 SUMO-like); PF14560(Ubiquitin_2:Ubiquitin-like domain)
TRINITY_DN25374_c0_g2	Cluster 6		32.5839	5.02609	0.00359474	0.0442961	yes	up					ENOG410ZDTK(L:Replication, recombination and repair)	ENOG410ZDTK(DEAD DEAH box helicase)
TRINITY_DN51353_c0_g1	Cluster 6		7.53567	2.91374	0.00373855	0.045749	yes	up
TRINITY_DN56516_c0_g1	Cluster 6	probable 2-oxoglutarate-dependent dioxygenase ANS [Selaginella moellendorffii]	5.33613	2.41579	0.00377528	0.0460868	yes	up	GO:0046872(molecular_function:metal ion binding); GO:0051213(molecular_function:dioxygenase activity); GO:0016491(molecular_function:oxidoreductase activity)				COG3491(S:Function unknown)	COG3491(2OGFe(II) oxygenase)	sp|D4N502|DIOX3_PAPSO(Codeine O-demethylase OS=Papaver somniferum OX=3469 GN=CODM PE=1 SV=1)	PF03171(2OG-FeII_Oxy:2OG-Fe(II) oxygenase superfamily)
TRINITY_DN27218_c0_g1	Cluster 6	hypothetical protein AXG93_1024s1190 [Marchantia polymorpha subsp. ruderalis]	2.24631	1.16756	0.00382907	0.0466064	yes	up	GO:0003700(molecular_function:transcription factor activity, sequence-specific DNA binding); GO:0043565(molecular_function:sequence-specific DNA binding); GO:0005634(cellular_component:nucleus)				ENOG410YDVM(K:Transcription)	ENOG410YDVM(Transcription factor)	sp|Q9XEC3|WRK42_ARATH(WRKY transcription factor 42 OS=Arabidopsis thaliana OX=3702 GN=WRKY42 PE=1 SV=1)	PF03106(WRKY:WRKY DNA -binding domain)
TRINITY_DN42144_c0_g3	Cluster 6		6.91011	2.78871	0.00389456	0.0472084	yes	up
TRINITY_DN78299_c0_g1	Cluster 6	uncharacterized protein LOC9648412 isoform X1 [Selaginella moellendorffii]	3.15682	1.65847	0.00398716	0.0480178	yes	up	GO:0004523(molecular_function:RNA-DNA hybrid ribonuclease activity); GO:0003676(molecular_function:nucleic acid binding)				ENOG410Y65V(S:Function unknown)	ENOG410Y65V(Retrotransposon protein)	sp|P0C2F6|RNHX1_ARATH(Putative ribonuclease H protein At1g65750 OS=Arabidopsis thaliana OX=3702 GN=At1g65750 PE=3 SV=1)	PF13456(RVT_3:Reverse transcriptase-like); PF00075(RNase_H:RNase H)
TRINITY_DN57508_c0_g1	Cluster 6		22.1135	4.46686	0.00399634	0.0480956	yes	up
TRINITY_DN31975_c0_g1	Cluster 6		32.3886	5.01741	0.00413917	0.049444	yes	up
TRINITY_DN7539_c0_g1	Cluster 7	inositol oxygenase 1-like [Physcomitrella patens]	7.67259	2.93971	4.90558e-30	4.68396e-27	yes	up	GO:0005737(cellular_component:cytoplasm); GO:0050113(molecular_function:inositol oxygenase activity); GO:0019310(biological_process:inositol catabolic process); GO:0005506(molecular_function:iron ion binding)	K00469	MIOX	map00053(Ascorbate and aldarate metabolism); map00562(Inositol phosphate metabolism)	ENOG410XQ4J(S:Function unknown)	ENOG410XQ4J(-)	sp|Q8L799|MIOX1_ARATH(Inositol oxygenase 1 OS=Arabidopsis thaliana OX=3702 GN=MIOX1 PE=2 SV=1)	PF05153(MIOX:Myo-inositol oxygenase)
TRINITY_DN12682_c0_g1	Cluster 7		4.64317	2.21511	4.81915e-28	4.00596e-25	yes	up					ENOG410YRRT(S:Function unknown)	ENOG410YRRT(14 kDa proline-rich protein)	sp|Q39176|ERLI1_ARATH(Lipid transfer protein EARLI 1 OS=Arabidopsis thaliana OX=3702 GN=EARLI1 PE=1 SV=1)	PF14547(Hydrophob_seed:Hydrophobic seed protein); PF00234(Tryp_alpha_amyl:Protease inhibitor/seed storage/LTP family); PF14368(LTP_2:Probable lipid transfer)
TRINITY_DN6108_c0_g1	Cluster 7		4.93952	2.30437	1.28249e-24	8.97194e-22	yes	up
TRINITY_DN9473_c0_g1	Cluster 7	60S acidic ribosomal protein P0-like [Physcomitrella patens]	3.99167	1.99699	1.17232e-21	6.18152e-19	yes	up	GO:0042254(biological_process:ribosome biogenesis); GO:0005840(cellular_component:ribosome)	K02941	RP-LP0, RPLP0	map03010(Ribosome)			sp|P41095|RLA0_ORYSJ(60S acidic ribosomal protein P0 OS=Oryza sativa subsp. japonica OX=39947 GN=Os08g0130500 PE=1 SV=3)	PF00466(Ribosomal_L10:Ribosomal protein L10); PF17777(RL10P_insert:Insertion domain in 60S ribosomal protein L10P); PF00428(Ribosomal_60s:60s Acidic ribosomal protein)
TRINITY_DN13894_c0_g1	Cluster 7	hypothetical protein SELMODRAFT_15697, partial [Selaginella moellendorffii]	4.53396	2.18077	3.63074e-21	1.83241e-18	yes	up	GO:0016021(cellular_component:integral component of membrane); GO:0020037(molecular_function:heme binding); GO:0055114(biological_process:oxidation-reduction process); GO:0016491(molecular_function:oxidoreductase activity)				COG0378(K:Transcription); COG0378(O:Posttranslational modification, protein turnover, chaperones)	COG0378(Facilitates the functional incorporation of the urease nickel metallocenter. This process requires GTP hydrolysis, probably effectuated by UreG (By similarity)); COG0378(Facilitates the functional incorporation of the urease nickel metallocenter. This process requires GTP hydrolysis, probably effectuated by UreG (By similarity))	sp|Q0WPS2|B561M_ARATH(Cytochrome b561 domain-containing protein At4g18260 OS=Arabidopsis thaliana OX=3702 GN=At4g18260 PE=2 SV=1)	PF03188(Cytochrom_B561:Eukaryotic cytochrome b561); PF06687(SUR7:SUR7/PalI family)
TRINITY_DN18760_c0_g1	Cluster 7	hypothetical protein MARPO_0003s0137 [Marchantia polymorpha]	3.42191	1.7748	4.42244e-20	1.9903e-17	yes	up	GO:0016891(molecular_function:endoribonuclease activity, producing 5'-phosphomonoesters); GO:0042779(biological_process:tRNA 3'-trailer cleavage)	K00784	rnz	map03013(RNA transport)	COG0580(S:Function unknown); COG1234(S:Function unknown)	COG0580(Zinc phosphodiesterase, which displays some tRNA 3'- processing endonuclease activity. Probably involved in tRNA maturation, by removing a 3'-trailer from precursor tRNA (By similarity)); COG1234(Zinc phosphodiesterase, which displays some tRNA 3'- processing endonuclease activity. Probably involved in tRNA maturation, by removing a 3'-trailer from precursor tRNA (By similarity))	sp|F4J1H7|RNZ4_ARATH(tRNAse Z TRZ4, mitochondrial OS=Arabidopsis thaliana OX=3702 GN=TRZ4 PE=2 SV=1)	PF13691(Lactamase_B_4:tRNase Z endonuclease); PF12706(Lactamase_B_2:Beta-lactamase superfamily domain)
TRINITY_DN13768_c0_g1	Cluster 7		21.1274	4.40105	3.56873e-19	1.45966e-16	yes	up
TRINITY_DN13179_c0_g1	Cluster 7	probable aldo-keto reductase 2 [Physcomitrella patens]	3.51146	1.81207	4.58834e-17	1.5079e-14	yes	up	GO:0016491(molecular_function:oxidoreductase activity)						sp|P40691|A115_TOBAC(Auxin-induced protein PCNT115 OS=Nicotiana tabacum OX=4097 PE=2 SV=1)	PF00248(Aldo_ket_red:Aldo/keto reductase family)
TRINITY_DN51866_c0_g1	Cluster 7	hypothetical protein AXG93_1089s1040 [Marchantia polymorpha subsp. ruderalis]	5.72677	2.51772	2.03618e-15	5.53347e-13	yes	up	GO:0006355(biological_process:regulation of transcription, DNA-templated); GO:0016021(cellular_component:integral component of membrane); GO:0015232(molecular_function:heme transporter activity); GO:0005739(cellular_component:mitochondrion); GO:0017004(biological_process:cytochrome complex assembly)						sp|Q9SZL8|FRS5_ARATH(Protein FAR1-RELATED SEQUENCE 5 OS=Arabidopsis thaliana OX=3702 GN=FRS5 PE=1 SV=1)	PF10551(MULE:MULE transposase domain)
TRINITY_DN57403_c0_g3	Cluster 7		28.2195	4.81862	8.1714e-14	1.73383e-11	yes	up
TRINITY_DN14382_c0_g1	Cluster 7		11.5691	3.53221	3.46409e-13	6.61519e-11	yes	up
TRINITY_DN2193_c0_g1	Cluster 7	alpha-1,3/1,6-mannosyltransferase ALG2-like [Physcomitrella patens]	2.20044	1.13779	5.69078e-13	1.04169e-10	yes	up	GO:0004378(molecular_function:GDP-Man:Man1GlcNAc2-PP-Dol alpha-1,3-mannosyltransferase activity); GO:0016021(cellular_component:integral component of membrane); GO:0016740(molecular_function:transferase activity); GO:0006486(biological_process:protein glycosylation)	K03843	ALG2	map00510(N-Glycan biosynthesis); map00513(Various types of N-glycan biosynthesis)	COG0438(S:Function unknown)	COG0438(Domain-Containing protein)	sp|Q7KWM5|ALG2_DICDI(Alpha-1,3/1,6-mannosyltransferase ALG2 OS=Dictyostelium discoideum OX=44689 GN=alg2 PE=3 SV=1)	PF00534(Glycos_transf_1:Glycosyl transferases group 1); PF13692(Glyco_trans_1_4:Glycosyl transferases group 1); PF13439(Glyco_transf_4:Glycosyltransferase Family 4); PF13579(Glyco_trans_4_4:Glycosyl transferase 4-like domain); PF13524(Glyco_trans_1_2:Glycosyl transferases group 1)
TRINITY_DN3396_c0_g1	Cluster 7	hypothetical protein MARPO_0001s0529 [Marchantia polymorpha]	3.10726	1.63564	6.6196e-13	1.19317e-10	yes	up	GO:0031408(biological_process:oxylipin biosynthetic process); GO:0046872(molecular_function:metal ion binding); GO:0016702(molecular_function:oxidoreductase activity, acting on single donors with incorporation of molecular oxygen, incorporation of two atoms of oxygen); GO:0050080(molecular_function:malonyl-CoA decarboxylase activity)	K00454	LOX2S	map00591(Linoleic acid metabolism); map00592(alpha-Linolenic acid metabolism)	ENOG410YN4N(S:Function unknown)	ENOG410YN4N(Plant lipoxygenase may be involved in a number of diverse aspects of plant physiology including growth and development, pest resistance, and senescence or responses to wounding (By similarity))	sp|R9WS04|LOX2_TANCI(Lipoxygenase 2, chloroplastic OS=Tanacetum cinerariifolium OX=118510 GN=LOX2 PE=2 SV=1)	PF00305(Lipoxygenase:Lipoxygenase); PF01477(PLAT:PLAT/LH2 domain)
TRINITY_DN17853_c0_g1	Cluster 7		4.52971	2.17942	5.04886e-12	7.59016e-10	yes	up
TRINITY_DN860_c0_g1	Cluster 7	pathogen-related protein-like [Physcomitrella patens]	2.60617	1.38193	2.39923e-11	3.24135e-09	yes	up	GO:0043565(molecular_function:sequence-specific DNA binding); GO:0044212(molecular_function:transcription regulatory region DNA binding); GO:0003700(molecular_function:transcription factor activity, sequence-specific DNA binding); GO:0005634(cellular_component:nucleus); GO:0007275(biological_process:multicellular organism development); GO:0045944(biological_process:positive regulation of transcri…				ENOG410YA3P(S:Function unknown)	ENOG410YA3P(-)	sp|P16273|PRPX_HORVU(Pathogen-related protein OS=Hordeum vulgare OX=4513 PE=2 SV=2)
TRINITY_DN15613_c0_g1	Cluster 7	endoglucanase 25 [Selaginella moellendorffii]	2.75137	1.46015	2.87992e-11	3.83214e-09	yes	up	GO:0016021(cellular_component:integral component of membrane); GO:0008810(molecular_function:cellulase activity); GO:0030245(biological_process:cellulose catabolic process)	K01179	E3.2.1.4	map00500(Starch and sucrose metabolism)	ENOG410YBAV(S:Function unknown)	ENOG410YBAV(endo-glucanase)	sp|Q7XUK4|GUN12_ORYSJ(Endoglucanase 12 OS=Oryza sativa subsp. japonica OX=39947 GN=GLU3 PE=2 SV=2)	PF00759(Glyco_hydro_9:Glycosyl hydrolase family 9)
TRINITY_DN17151_c0_g1	Cluster 7	alpha-amylase type B isozyme [Selaginella moellendorffii]	7.90098	2.98203	4.79543e-11	6.12714e-09	yes	up	GO:0004556(molecular_function:alpha-amylase activity); GO:0103025(molecular_function:alpha-amylase activity (releasing maltohexaose)); GO:0005975(biological_process:carbohydrate metabolic process); GO:0005509(molecular_function:calcium ion binding)	K01176	AMY, amyA, malS	map00500(Starch and sucrose metabolism)	COG0366(G:Carbohydrate transport and metabolism)	COG0366(alpha amylase, catalytic)	sp|P17859|AMYA_VIGMU(Alpha-amylase OS=Vigna mungo OX=3915 GN=AMY1.1 PE=2 SV=1)	PF07821(Alpha-amyl_C2:Alpha-amylase C-terminal beta-sheet domain); PF00128(Alpha-amylase:Alpha amylase, catalytic domain)
TRINITY_DN11825_c2_g1	Cluster 7	peroxidase 57-like [Physcomitrella patens]	2.99057	1.58042	5.5605e-11	7.00211e-09	yes	up	GO:0020037(molecular_function:heme binding); GO:0006979(biological_process:response to oxidative stress); GO:0005576(cellular_component:extracellular region); GO:0042744(biological_process:hydrogen peroxide catabolic process); GO:0046872(molecular_function:metal ion binding); GO:0004601(molecular_function:peroxidase activity)	K00430	E1.11.1.7	map00940(Phenylpropanoid biosynthesis)	ENOG4110UVG(G:Carbohydrate transport and metabolism)	ENOG4110UVG(peroxidase)	sp|Q43729|PER57_ARATH(Peroxidase 57 OS=Arabidopsis thaliana OX=3702 GN=PER57 PE=1 SV=1)	PF00141(peroxidase:Peroxidase)
TRINITY_DN6371_c0_g3	Cluster 7	hypothetical protein SELMODRAFT_167957 [Selaginella moellendorffii]	5.18477	2.37428	5.62208e-11	7.05576e-09	yes	up	GO:0016758(molecular_function:transferase activity, transferring hexosyl groups)	K13495	CISZOG	map00908(Zeatin biosynthesis)	COG1819(S:Function unknown)	COG1819(Transferase)	sp|Q9ZSK5|ZOG_PHALU(Zeatin O-glucosyltransferase OS=Phaseolus lunatus OX=3884 GN=ZOG1 PE=2 SV=1)	PF00201(UDPGT:UDP-glucoronosyl and UDP-glucosyl transferase)
TRINITY_DN13212_c0_g1	Cluster 7	hypothetical protein SELMODRAFT_29247, partial [Selaginella moellendorffii]	5.67894	2.50562	1.68813e-10	1.98136e-08	yes	up	GO:0003700(molecular_function:transcription factor activity, sequence-specific DNA binding); GO:0043565(molecular_function:sequence-specific DNA binding); GO:0005634(cellular_component:nucleus)				ENOG410YM5M(K:Transcription)	ENOG410YM5M(WRKY)	sp|Q9FYA2|WRK75_ARATH(Probable WRKY transcription factor 75 OS=Arabidopsis thaliana OX=3702 GN=WRKY75 PE=2 SV=1)	PF03106(WRKY:WRKY DNA -binding domain)
TRINITY_DN7198_c1_g1	Cluster 7	tropinone reductase homolog At5g06060-like isoform X2 [Physcomitrella patens]	11.462	3.51879	4.46172e-10	4.76211e-08	yes	up	GO:0046540(cellular_component:U4/U6 x U5 tri-snRNP complex); GO:0016021(cellular_component:integral component of membrane); GO:0000398(biological_process:mRNA splicing, via spliceosome); GO:0016491(molecular_function:oxidoreductase activity)	K08081	TR1	map00960(Tropane, piperidine and pyridine alkaloid biosynthesis)	COG1028(S:Function unknown)	COG1028(Pentatricopeptide repeat-containing protein)	sp|Q9ZW20|TRNHD_ARATH(Tropinone reductase homolog At2g29370 OS=Arabidopsis thaliana OX=3702 GN=At2g29370 PE=3 SV=1)	PF13561(adh_short_C2:Enoyl-(Acyl carrier protein) reductase); PF00106(adh_short:short chain dehydrogenase); PF08659(KR:KR domain)
TRINITY_DN31612_c0_g2	Cluster 7		14.157	3.82344	5.8431e-10	6.13456e-08	yes	up
TRINITY_DN9032_c1_g1	Cluster 7		5.67374	2.5043	8.72783e-10	8.73487e-08	yes	up					ENOG410Y65V(S:Function unknown)	ENOG410Y65V(Retrotransposon protein)	sp|P11369|LORF2_MOUSE(LINE-1 retrotransposable element ORF2 protein OS=Mus musculus OX=10090 GN=Pol PE=1 SV=2)
TRINITY_DN272_c0_g1	Cluster 7	AT-hook motif nuclear-localized protein 23-like [Physcomitrella patens]	2.08979	1.06336	1.63643e-09	1.51939e-07	yes	up	GO:0003700(molecular_function:transcription factor activity, sequence-specific DNA binding); GO:0003680(molecular_function:AT DNA binding); GO:0005634(cellular_component:nucleus)				ENOG410YGVK(S:Function unknown)	ENOG410YGVK(Domain of unknown function (DUF296))	sp|Q9LTA2|AHL17_ARATH(AT-hook motif nuclear-localized protein 17 OS=Arabidopsis thaliana OX=3702 GN=AHL17 PE=2 SV=1)	PF03479(PCC:Plants and Prokaryotes Conserved (PCC) domain)
TRINITY_DN723_c1_g1	Cluster 7		2.25741	1.17467	2.78225e-09	2.46966e-07	yes	up
TRINITY_DN119_c0_g1	Cluster 7		18.3627	4.19871	4.13509e-09	3.55875e-07	yes	up					ENOG410YXD4(S:Function unknown)	ENOG410YXD4(OBERON 3-like)	sp|P20346|DF322_SOLTU(Defensin-like protein P322 OS=Solanum tuberosum OX=4113 PE=2 SV=1)	PF00304(Gamma-thionin:Gamma-thionin family)
TRINITY_DN13280_c0_g1	Cluster 7	cinnamyl alcohol dehydrogenase 1 [Plagiochasma appendiculatum]	2.4385	1.286	4.28582e-09	3.67504e-07	yes	up	GO:0050662(molecular_function:coenzyme binding); GO:0003824(molecular_function:catalytic activity); GO:0016021(cellular_component:integral component of membrane); GO:0052747(molecular_function:sinapyl alcohol dehydrogenase activity); GO:0045552(molecular_function:dihydrokaempferol 4-reductase activity); GO:0045551(molecular_function:cinnamyl-alcohol dehydrogenase activity)				COG0451(M:Cell wall/membrane/envelope biogenesis)	COG0451(Nad-dependent epimerase dehydratase)	sp|Q9S9N9|CCR1_ARATH(Cinnamoyl-CoA reductase 1 OS=Arabidopsis thaliana OX=3702 GN=CCR1 PE=1 SV=1)	PF01370(Epimerase:NAD dependent epimerase/dehydratase family); PF16363(GDP_Man_Dehyd:GDP-mannose 4,6 dehydratase)
TRINITY_DN17097_c0_g1	Cluster 7		6.99925	2.8072	4.46001e-09	3.81514e-07	yes	up					ENOG411288N(S:Function unknown); ENOG410XYMV(S:Function unknown)	ENOG411288N(-); ENOG410XYMV(-)
TRINITY_DN35194_c0_g2	Cluster 7		17.7588	4.15046	1.10295e-08	8.68794e-07	yes	up					ENOG410YSAJ(S:Function unknown)	ENOG410YSAJ(-)
TRINITY_DN53213_c0_g1	Cluster 7		181.837	7.5065	2.18427e-08	1.59107e-06	yes	up
TRINITY_DN83437_c1_g1	Cluster 7		147.901	7.20848	4.89726e-08	3.27986e-06	yes	up
TRINITY_DN9269_c0_g1	Cluster 7	R2R3-MYB transcription factor [Selaginella moellendorffii]	4.83494	2.2735	6.21338e-08	4.04626e-06	yes	up	GO:0005634(cellular_component:nucleus); GO:0003677(molecular_function:DNA binding)	K09422	MYBP		COG5147(S:Function unknown)	COG5147(PI-PLC X domain-containing protein)	sp|Q38850|MYB5_ARATH(Transcription repressor MYB5 OS=Arabidopsis thaliana OX=3702 GN=MYB5 PE=1 SV=1)	PF00249(Myb_DNA-binding:Myb-like DNA-binding domain); PF13921(Myb_DNA-bind_6:Myb-like DNA-binding domain)
TRINITY_DN27177_c0_g1	Cluster 7		11.3682	3.50693	6.3609e-08	4.1347e-06	yes	up
TRINITY_DN13688_c0_g1	Cluster 7	cytochrome P450 71A1 [Selaginella moellendorffii]	2.42378	1.27726	2.07854e-07	1.18629e-05	yes	up	GO:0005506(molecular_function:iron ion binding); GO:0016705(molecular_function:oxidoreductase activity, acting on paired donors, with incorporation or reduction of molecular oxygen); GO:0004497(molecular_function:monooxygenase activity); GO:0020037(molecular_function:heme binding)	K13260	CYP81E1_7	map00943(Isoflavonoid biosynthesis)	COG2124(Q:Secondary metabolites biosynthesis, transport and catabolism)	COG2124(Cytochrome p450)	sp|W8JIS9|CYC13_CATRO(Cytochrome P450 81C13 OS=Catharanthus roseus OX=4058 GN=CYP81C13 PE=2 SV=1)	PF00067(p450:Cytochrome P450)
TRINITY_DN5403_c0_g1	Cluster 7		3.93024	1.97462	2.16394e-07	1.22917e-05	yes	up					ENOG410YXD4(S:Function unknown); ENOG41119RB(S:Function unknown)	ENOG410YXD4(Defensin-like protein); ENOG41119RB(Defensin-like protein)	sp|Q9FFP8|DEF06_ARATH(Defensin-like protein 6 OS=Arabidopsis thaliana OX=3702 GN=PDF2.5 PE=3 SV=1)	PF00304(Gamma-thionin:Gamma-thionin family)
TRINITY_DN17604_c0_g1	Cluster 7		14.6858	3.87635	2.28543e-07	1.29082e-05	yes	up					ENOG41122GY(S:Function unknown)	ENOG41122GY(-)	sp|Q3BAI2|YCX91_PHAAO(Uncharacterized protein ORF91 OS=Phalaenopsis aphrodite subsp. formosana OX=308872 PE=4 SV=1)
TRINITY_DN92074_c0_g1	Cluster 7	hypothetical protein MARPO_0029s0092 [Marchantia polymorpha]	132.643	7.0514	2.29126e-07	1.29308e-05	yes	up	GO:0006561(biological_process:proline biosynthetic process); GO:0005618(cellular_component:cell wall); GO:0004735(molecular_function:pyrroline-5-carboxylate reductase activity); GO:0009651(biological_process:response to salt stress); GO:0009408(biological_process:response to heat); GO:0055129(biological_process:L-proline biosynthetic process)	K00286	proC	map00330(Arginine and proline metabolism)	COG0345(S:Function unknown)	COG0345(Retrotransposon protein)	sp|Q54IL7|P5CR1_DICDI(Pyrroline-5-carboxylate reductase 1 OS=Dictyostelium discoideum OX=44689 GN=pycr1 PE=3 SV=1)	PF14748(P5CR_dimer:Pyrroline-5-carboxylate reductase dimerisation); PF03807(F420_oxidored:NADP oxidoreductase coenzyme F420-dependent); PF01210(NAD_Gly3P_dh_N:NAD-dependent glycerol-3-phosphate dehydrogenase N-terminus); PF07991(IlvN:Acetohydroxy acid isomeroreductase, NADPH-binding domain); PF03446(NAD_binding_2:NAD binding domain of 6-phosphogluconate dehydrogenase); PF02558(ApbA:Ketopantoate r…
TRINITY_DN10051_c0_g1	Cluster 7	linamarin synthase 1 [Selaginella moellendorffii]	3.00962	1.58958	2.63787e-07	1.46413e-05	yes	up	GO:0016758(molecular_function:transferase activity, transferring hexosyl groups)				COG1819(S:Function unknown)	COG1819(Transferase)	sp|Q9ZUV0|U86A2_ARATH(UDP-glycosyltransferase 86A2 OS=Arabidopsis thaliana OX=3702 GN=UGT86A2 PE=2 SV=1)
TRINITY_DN79658_c0_g1	Cluster 7		118.431	6.8879	4.06637e-07	2.14736e-05	yes	up		K02892	RP-L23, MRPL23, rplW	map03010(Ribosome)			sp|Q0PUX0|RK23_PRUPE(50S ribosomal protein L23, chloroplastic OS=Prunus persica OX=3760 GN=rpl23 PE=3 SV=1)
TRINITY_DN45967_c0_g3	Cluster 7		151.662	7.24471	4.53266e-07	2.36358e-05	yes	up
TRINITY_DN53823_c0_g3	Cluster 7		19.2655	4.26794	5.57082e-07	2.83382e-05	yes	up					ENOG411288N(S:Function unknown)	ENOG411288N(-)
TRINITY_DN6080_c0_g3	Cluster 7		6.98004	2.80324	6.66303e-07	3.30379e-05	yes	up
TRINITY_DN15438_c0_g2	Cluster 7		8.2698	3.04785	1.13004e-06	5.24605e-05	yes	up
TRINITY_DN44296_c0_g1	Cluster 7		104.13	6.70224	1.13759e-06	5.27766e-05	yes	up
TRINITY_DN1561_c2_g1	Cluster 7		116.227	6.8608	1.1687e-06	5.39718e-05	yes	up					ENOG4111UA7(S:Function unknown); ENOG410Y2V0(S:Function unknown)	ENOG4111UA7(-); ENOG410Y2V0(-)
TRINITY_DN49025_c0_g1	Cluster 7		7.27681	2.86331	2.00183e-06	8.61935e-05	yes	up
TRINITY_DN3146_c0_g2	Cluster 7		13.7857	3.7851	2.3575e-06	9.88725e-05	yes	up
TRINITY_DN674_c0_g1	Cluster 7	ent-kaurene synthase [Lygodium japonicum]	2.7184	1.44276	2.36218e-06	9.89945e-05	yes	up	GO:0050559(molecular_function:copalyl diphosphate synthase activity); GO:0010333(molecular_function:terpene synthase activity); GO:0000287(molecular_function:magnesium ion binding); GO:0009686(biological_process:gibberellin biosynthetic process); GO:0009905(molecular_function:ent-copalyl diphosphate synthase activity); GO:0016102(biological_process:diterpenoid biosynthetic process); GO:0016114(bi…	K15803	GERD	map00909(Sesquiterpenoid and triterpenoid biosynthesis)	ENOG410YBXH(S:Function unknown)	ENOG410YBXH(synthase)	sp|W0FFD7|DS_PERHD((-)-drimenol synthase OS=Persicaria hydropiper OX=46901 PE=1 SV=1)	PF01397(Terpene_synth:Terpene synthase, N-terminal domain); PF03936(Terpene_synth_C:Terpene synthase family, metal binding domain)
TRINITY_DN6999_c0_g1	Cluster 7	flavonoid synthase I [Conocephalum japonicum]	2.53103	1.33972	2.94515e-06	0.000120078	yes	up	GO:0046872(molecular_function:metal ion binding); GO:0045486(molecular_function:naringenin 3-dioxygenase activity); GO:0016491(molecular_function:oxidoreductase activity)	K00475	F3H	map00941(Flavonoid biosynthesis)	COG3491(S:Function unknown)	COG3491(2OGFe(II) oxygenase)	sp|P41090|FL3H_VITVI(Naringenin,2-oxoglutarate 3-dioxygenase OS=Vitis vinifera OX=29760 GN=F3H PE=2 SV=1)	PF03171(2OG-FeII_Oxy:2OG-Fe(II) oxygenase superfamily)
TRINITY_DN16202_c0_g1	Cluster 7		93.9214	6.55338	3.01615e-06	0.00012276	yes	up
TRINITY_DN24688_c0_g1	Cluster 7		2.94124	1.55643	3.2333e-06	0.00013077	yes	up					ENOG41119RB(S:Function unknown); ENOG410YXD4(S:Function unknown)	ENOG41119RB(Defensin-like protein); ENOG410YXD4(Defensin-like protein)	sp|Q9FFP8|DEF06_ARATH(Defensin-like protein 6 OS=Arabidopsis thaliana OX=3702 GN=PDF2.5 PE=3 SV=1)	PF00304(Gamma-thionin:Gamma-thionin family)
TRINITY_DN34354_c0_g2	Cluster 7		5.69864	2.51062	3.89669e-06	0.000154159	yes	up
TRINITY_DN2417_c1_g1	Cluster 7		2.1402	1.09774	6.28178e-06	0.000231776	yes	up					ENOG410YUPY(S:Function unknown); ENOG410Y65V(S:Function unknown)	ENOG410YUPY(Retroelement); ENOG410Y65V(Retrotransposon protein)
TRINITY_DN9565_c0_g2	Cluster 7	flavin-containing monooxygenase FMO GS-OX-like 4 isoform X1 [Physcomitrella patens]	6.74495	2.75381	6.70568e-06	0.000245367	yes	up	GO:0050661(molecular_function:NADP binding); GO:0050660(molecular_function:flavin adenine dinucleotide binding); GO:0004499(molecular_function:N,N-dimethylaniline monooxygenase activity)				COG2072(P:Inorganic ion transport and metabolism)	COG2072(Monooxygenase)	sp|Q9FF12|GSXL9_ARATH(Flavin-containing monooxygenase FMO GS-OX-like 9 OS=Arabidopsis thaliana OX=3702 GN=At5g07800 PE=2 SV=1)	PF00743(FMO-like:Flavin-binding monooxygenase-like); PF13738(Pyr_redox_3:Pyridine nucleotide-disulphide oxidoreductase); PF07992(Pyr_redox_2:Pyridine nucleotide-disulphide oxidoreductase); PF13450(NAD_binding_8:NAD(P)-binding Rossmann-like domain); PF01266(DAO:FAD dependent oxidoreductase); PF01946(Thi4:Thi4 family); PF03486(HI0933_like:HI0933-like protein); PF00890(FAD_binding_2:FAD binding doma…
TRINITY_DN76222_c1_g2	Cluster 7		83.7417	6.38787	7.9833e-06	0.000283883	yes	up					ENOG41129MV(S:Function unknown)	ENOG41129MV(-)
TRINITY_DN65230_c0_g3	Cluster 7		87.1779	6.44589	8.41362e-06	0.000296647	yes	up
TRINITY_DN23403_c1_g1	Cluster 7		17.0433	4.09113	1.69937e-05	0.000542088	yes	up
TRINITY_DN13564_c1_g3	Cluster 7		3.21738	1.68588	1.87064e-05	0.000591117	yes	up
TRINITY_DN19899_c4_g2	Cluster 7	uncharacterized protein LOC112342112 [Selaginella moellendorffii]	2.01073	1.00772	1.93059e-05	0.000606806	yes	up	GO:0015074(biological_process:DNA integration); GO:0003676(molecular_function:nucleic acid binding); GO:0008168(molecular_function:methyltransferase activity)				COG2801(L:Replication, recombination and repair)	COG2801(Retrotransposon protein)	sp|Q7LHG5|YI31B_YEAST(Transposon Ty3-I Gag-Pol polyprotein OS=Saccharomyces cerevisiae (strain ATCC 204508 / S288c) OX=559292 GN=TY3B-I PE=1 SV=2)	PF17917(RT_RNaseH:RNase H-like domain found in reverse transcriptase); PF17919(RT_RNaseH_2:RNase H-like domain found in reverse transcriptase); PF08284(RVP_2:Retroviral aspartyl protease); PF00078(RVT_1:Reverse transcriptase (RNA-dependent DNA polymerase)); PF17921(Integrase_H2C2:Integrase zinc binding domain)
TRINITY_DN22838_c0_g2	Cluster 7	hypothetical protein MARPO_0120s0003 [Marchantia polymorpha]	18.5466	4.21308	2.40874e-05	0.000730763	yes	up	GO:0005737(cellular_component:cytoplasm); GO:0007017(biological_process:microtubule-based process); GO:0003924(molecular_function:GTPase activity); GO:0005200(molecular_function:structural constituent of cytoskeleton); GO:0005874(cellular_component:microtubule); GO:0005525(molecular_function:GTP binding)	K07374	TUBA	map04145(Phagosome)	COG5023(Z:Cytoskeleton)	COG5023(protein polymerization)	sp|P11481|TBA1_VOLCA(Tubulin alpha-1/alpha-2 chain OS=Volvox carteri OX=3067 GN=TUBA1 PE=3 SV=1)	PF00091(Tubulin:Tubulin/FtsZ family, GTPase domain)
TRINITY_DN15786_c0_g1	Cluster 7	hypothetical protein SELMODRAFT_38723, partial [Selaginella moellendorffii]	5.88168	2.55623	2.76508e-05	0.000820893	yes	up	GO:0005618(cellular_component:cell wall); GO:0008061(molecular_function:chitin binding)				ENOG410XTMI(S:Function unknown)	ENOG410XTMI(DPBB_1)	sp|Q9ZP41|EGC_CITJA(EG45-like domain containing protein OS=Citrus jambhiri OX=64884 GN=CjBAp12 PE=1 SV=1)	PF03330(DPBB_1:Lytic transglycolase); PF00967(Barwin:Barwin family)
TRINITY_DN43914_c0_g2	Cluster 7		52.4283	5.71227	3.11618e-05	0.000906463	yes	up					ENOG410YJ7V(S:Function unknown)	ENOG410YJ7V(C2 domain)	sp|O04023|SRC2_ARATH(Protein SRC2 homolog OS=Arabidopsis thaliana OX=3702 GN=SRC2 PE=1 SV=1)	PF00168(C2:C2 domain)
TRINITY_DN38488_c0_g1	Cluster 7	F-box/kelch-repeat protein At5g15710-like [Physcomitrella patens]	2.44517	1.28994	3.69911e-05	0.0010538	yes	up	GO:0004842(molecular_function:ubiquitin-protein transferase activity); GO:0031146(biological_process:SCF-dependent proteasomal ubiquitin-dependent protein catabolic process)				ENOG410YVTQ(S:Function unknown)	ENOG410YVTQ(CONTAINS InterPro DOMAIN s Cyclin-like F-box (InterPro IPR001810), F-box associated (InterPro IPR006527), F-box associated type 1 (InterPro IPR017451))	sp|Q9SU30|CPR1_ARATH(F-box protein CPR1 OS=Arabidopsis thaliana OX=3702 GN=CPR1 PE=1 SV=2)	PF00646(F-box:F-box domain)
TRINITY_DN33198_c0_g1	Cluster 7		6.50499	2.70155	4.09173e-05	0.00114635	yes	up
TRINITY_DN13797_c0_g1	Cluster 7		2.32301	1.216	5.27172e-05	0.00142007	yes	up
TRINITY_DN45819_c0_g1	Cluster 7	granule-bound starch synthase 1, chloroplastic/amyloplastic-like [Selaginella moellendorffii]	2.31004	1.20792	5.46645e-05	0.0014647	yes	up	GO:0009569(cellular_component:chloroplast starch grain); GO:0009570(cellular_component:chloroplast stroma); GO:0004373(molecular_function:glycogen (starch) synthase activity); GO:0009011(molecular_function:starch synthase activity); GO:0009501(cellular_component:amyloplast); GO:0019252(biological_process:starch biosynthetic process); GO:0010021(biological_process:amylopectin biosynthetic process)…	K13679	WAXY	map00500(Starch and sucrose metabolism)			sp|O82627|SSG1_ANTMA(Granule-bound starch synthase 1, chloroplastic/amyloplastic OS=Antirrhinum majus OX=4151 GN=WAXY PE=2 SV=1)	PF08323(Glyco_transf_5:Starch synthase catalytic domain); PF00534(Glycos_transf_1:Glycosyl transferases group 1); PF13692(Glyco_trans_1_4:Glycosyl transferases group 1); PF13439(Glyco_transf_4:Glycosyltransferase Family 4)
TRINITY_DN21073_c0_g1	Cluster 7	hypothetical protein MARPO_0075s0021 [Marchantia polymorpha]	9.46297	3.24229	5.49379e-05	0.00147036	yes	up	GO:0016021(cellular_component:integral component of membrane); GO:0045485(molecular_function:omega-6 fatty acid desaturase activity); GO:0006629(biological_process:lipid metabolic process); GO:0016717(molecular_function:oxidoreductase activity, acting on paired donors, with oxidation of a pair of donors resulting in the reduction of molecular oxygen to two molecules of water)	K10256	FAD2	map01040(Biosynthesis of unsaturated fatty acids)	COG3239(I:Lipid transport and metabolism)	COG3239(linoleoyl-CoA desaturase activity)	sp|Q84VT2|FAD12_PUNGR(Delta(12)-acyl-lipid-desaturase OS=Punica granatum OX=22663 GN=FAD12 PE=2 SV=2)	PF00487(FA_desaturase:Fatty acid desaturase); PF11960(DUF3474:Domain of unknown function (DUF3474))
[truncated: 70 more rows]
